# Supplementary material for: Methylation Quantitative Trait Loci are Largely Consistent across Disease States in Crohn’s disease
Source: bioRxiv preprint, doi:10.1101/2020.11.16.385534, version 1 (2020-11-17)
Supplement: Additional file Table S15 [file 385534_file18.xlsx]

## Sheet: CD-CpGs in Discovery Bon
The blood cis-mQTLs detected for 977 CD associated CpGs from Somineni et al. 2019 in discovery cohort
SNP	CpGs	Beta	t-stat	pvalue
rs571126	cg19070398	-0.0893445	-17.9248	3.15e-45
rs805883	cg19070398	-0.0892563	-17.8854	4.22e-45
rs10769150	cg03700417	-0.129031	-16.5869	6.73e-41
rs1873057	cg03700417	-0.124738	-14.3676	1.19e-33
rs570393;rs796963361;rs59562890	cg19070398	0.0764584	14.1299	7.14e-33
rs608938	cg19070398	0.0760998	13.9467	2.83e-32
rs6125883	cg00568296	-0.0834398	-13.9178	3.52e-32
rs34219567	cg10065189	-0.056985	-13.0457	2.43e-29
rs56245572	cg10065189	-0.056985	-13.0457	2.43e-29
rs1109279	cg10065189	-0.056985	-13.0457	2.43e-29
rs2793381	cg02280892	0.102913	12.0957	2.82e-26
rs2769355	cg20406979	0.0632979	12.0611	3.64e-26
rs2757054	cg20406979	0.0632979	12.0611	3.64e-26
rs443570	cg20406979	0.0622722	11.9417	8.78e-26
rs366938	cg20406979	0.0622436	11.9277	9.73e-26
rs1811121	cg20406979	0.0622436	11.9277	9.73e-26
rs394522	cg20406979	0.0622425	11.926	9.85e-26
rs10946199	cg20406979	0.062231	11.924	1e-25
rs1819333	cg20406979	0.0622275	11.922	1.01e-25
rs2013815	cg20406979	0.0622275	11.922	1.01e-25
rs2769349	cg20406979	0.0622275	11.922	1.01e-25
rs1187530	cg20406979	0.0622275	11.922	1.01e-25
rs2757050	cg20406979	0.0622275	11.922	1.01e-25
rs1590257	cg20406979	0.0622275	11.922	1.01e-25
rs2769351	cg20406979	0.0622275	11.922	1.01e-25
rs6939196	cg20406979	0.0622275	11.922	1.01e-25
rs2769354	cg20406979	0.0622275	11.922	1.01e-25
rs2757052	cg20406979	0.0622275	11.922	1.01e-25
rs1211447	cg20406979	0.0622275	11.922	1.01e-25
rs1187532	cg20406979	0.0622275	11.922	1.01e-25
rs434093	cg20406979	0.0622275	11.922	1.01e-25
rs448060	cg20406979	0.0622275	11.922	1.01e-25
rs365189	cg20406979	0.0622275	11.922	1.01e-25
rs376551	cg20406979	0.0622275	11.922	1.01e-25
rs386548	cg20406979	0.0622275	11.922	1.01e-25
rs402749	cg20406979	0.0622275	11.922	1.01e-25
rs385863	cg20406979	0.0622275	11.922	1.01e-25
rs397713	cg20406979	0.0622275	11.922	1.01e-25
rs453184	cg20406979	0.0622275	11.922	1.01e-25
rs436707	cg20406979	0.0622275	11.922	1.01e-25
rs442298	cg20406979	0.0622275	11.922	1.01e-25
rs377753	cg20406979	0.0622275	11.922	1.01e-25
rs430477	cg20406979	0.0622275	11.922	1.01e-25
rs376574	cg20406979	0.0622275	11.922	1.01e-25
rs439237	cg20406979	0.0622275	11.922	1.01e-25
rs9457247	cg20406979	0.0622275	11.922	1.01e-25
rs9459827	cg20406979	0.0622275	11.922	1.01e-25
rs1794699	cg20406979	0.0622275	11.922	1.01e-25
rs1743439	cg20406979	0.0622275	11.922	1.01e-25
rs13192426	cg20406979	0.0622275	11.922	1.01e-25
rs13192687	cg20406979	0.0622275	11.922	1.01e-25
rs9717548	cg20406979	0.0622275	11.922	1.01e-25
rs5020533	cg20406979	0.0622275	11.922	1.01e-25
rs1620933	cg20406979	0.0622275	11.922	1.01e-25
rs415987	cg20406979	0.0622275	11.922	1.01e-25
rs1794697	cg20406979	0.0622275	11.922	1.01e-25
rs34560498;rs386708543	cg20406979	0.0622275	11.922	1.01e-25
rs414437	cg20406979	0.0622275	11.922	1.01e-25
rs421214	cg20406979	0.0622275	11.922	1.01e-25
rs422094	cg20406979	0.0622275	11.922	1.01e-25
rs393558	cg20406979	0.0622275	11.922	1.01e-25
rs436625	cg20406979	0.0622275	11.922	1.01e-25
rs408040	cg20406979	0.0622275	11.922	1.01e-25
rs408918	cg20406979	0.0622275	11.922	1.01e-25
rs413232	cg20406979	0.0622275	11.922	1.01e-25
rs86755	cg20406979	0.0622275	11.922	1.01e-25
rs382009	cg20406979	0.0622275	11.922	1.01e-25
rs428805	cg20406979	0.0622275	11.922	1.01e-25
rs2345571	cg20406979	0.0622275	11.922	1.01e-25
rs385460	cg20406979	0.0622275	11.922	1.01e-25
rs385113	cg20406979	0.0622275	11.922	1.01e-25
rs932644	cg20406979	0.0622275	11.922	1.01e-25
rs10946198	cg20406979	0.0622275	11.922	1.01e-25
rs1743440	cg20406979	0.0622275	11.922	1.01e-25
rs1743441	cg20406979	0.0622275	11.922	1.01e-25
rs1794694	cg20406979	0.0622275	11.922	1.01e-25
rs430293	cg20406979	0.0622275	11.922	1.01e-25
rs430097	cg20406979	0.0622275	11.922	1.01e-25
rs409356	cg20406979	0.0622275	11.922	1.01e-25
rs447042	cg20406979	0.0622275	11.922	1.01e-25
rs402191	cg20406979	0.0622275	11.922	1.01e-25
rs1794693	cg20406979	0.0622275	11.922	1.01e-25
rs401260	cg20406979	0.0622275	11.922	1.01e-25
rs422694	cg20406979	0.0622275	11.922	1.01e-25
rs422780	cg20406979	0.0622275	11.922	1.01e-25
rs400176	cg20406979	0.0622275	11.922	1.01e-25
rs422562	cg20406979	0.0622275	11.922	1.01e-25
rs416131	cg20406979	0.0622275	11.922	1.01e-25
rs415890	cg20406979	0.0622275	11.922	1.01e-25
rs415842	cg20406979	0.0622275	11.922	1.01e-25
rs389956	cg20406979	0.0622275	11.922	1.01e-25
rs389946	cg20406979	0.0622275	11.922	1.01e-25
rs401261	cg20406979	0.0622113	11.9158	1.06e-25
rs2015864	cg20406979	0.0621449	11.8817	1.36e-25
rs1811123	cg20406979	0.0619799	11.7988	2.51e-25
rs364283	cg20406979	0.0619795	11.7652	3.21e-25
rs429083	cg20406979	0.0619795	11.7652	3.21e-25
rs393727	cg20406979	0.0612903	11.7492	3.61e-25
rs4710147	cg20406979	0.0618662	11.7477	3.65e-25
rs2757046	cg20406979	0.0618662	11.7477	3.65e-25
rs2757047	cg20406979	0.0618662	11.7477	3.65e-25
rs405553	cg20406979	0.0619143	11.6822	5.9e-25
rs2249731	cg02280892	0.0993168	11.6283	8.75e-25
rs1317170	cg02280892	0.0987898	11.482	2.55e-24
rs2570367	cg02280892	0.0987898	11.482	2.55e-24
rs2345573	cg20406979	0.0609964	11.4593	3.01e-24
rs407515	cg20406979	0.061227	11.4378	3.52e-24
rs406095	cg20406979	0.061227	11.4378	3.52e-24
rs4710160	cg20406979	0.061227	11.4378	3.52e-24
rs4710161	cg20406979	0.061227	11.4378	3.52e-24
rs388406	cg20406979	0.061227	11.4378	3.52e-24
rs430145	cg20406979	0.061227	11.4378	3.52e-24
rs425039	cg20406979	0.061227	11.4378	3.52e-24
rs376097	cg20406979	0.061227	11.4378	3.52e-24
rs424185	cg20406979	0.061227	11.4378	3.52e-24
rs400837	cg20406979	0.061227	11.4378	3.52e-24
rs4997107	cg20406979	0.0610625	11.4045	4.48e-24
rs439553	cg20406979	-0.0602714	-11.4019	4.57e-24
rs2149083	cg20406979	0.0603268	11.3835	5.22e-24
rs2149084	cg20406979	0.0603268	11.3835	5.22e-24
rs2769346	cg20406979	0.0603268	11.3835	5.22e-24
rs2149085	cg20406979	0.0603268	11.3835	5.22e-24
rs2769347	cg20406979	0.0603268	11.3835	5.22e-24
rs2769348	cg20406979	0.0603268	11.3835	5.22e-24
rs2149090	cg20406979	0.0603268	11.3835	5.22e-24
rs2149091	cg20406979	0.0603268	11.3835	5.22e-24
rs2149092	cg20406979	0.0603268	11.3835	5.22e-24
rs444210	cg20406979	-0.0603104	-11.3156	8.55e-24
rs400063	cg20406979	-0.0596886	-11.2889	1.04e-23
rs1794700	cg20406979	-0.0596886	-11.2889	1.04e-23
rs9900933	cg23470227	-0.0527272	-11.2016	1.96e-23
rs2757044	cg20406979	0.0599966	11.1852	2.2e-23
rs9903858	cg23470227	-0.0521086	-11.099	4.11e-23
rs8069105	cg23470227	-0.05247	-11.0962	4.2e-23
rs433191	cg20406979	0.0611221	11.0934	4.28e-23
rs1047743	cg23470227	-0.0520355	-11.0919	4.33e-23
rs408087	cg20406979	-0.0587182	-11.0603	5.44e-23
rs387733	cg20406979	0.0598525	10.9657	1.08e-22
rs56785718	cg27569037	0.0686224	10.8612	2.28e-22
rs7656235	cg27569037	0.0686224	10.8612	2.28e-22
rs6091092	cg00568296	-0.0938912	-10.7442	5.28e-22
rs10769151	cg03700417	-0.110149	-10.7397	5.46e-22
rs377232	cg20406979	-0.0589252	-10.6514	1.03e-21
rs4662721	cg09152259	0.0555322	10.6232	1.25e-21
rs4485425	cg23470227	-0.0507231	-10.5608	1.96e-21
rs4662724	cg09152259	0.0551781	10.5572	2.01e-21
rs1076714	cg00568296	-0.0734128	-10.5488	2.13e-21
rs12613413	cg09152259	0.0548888	10.5339	2.37e-21
rs2276683	cg09152259	0.0552283	10.5025	2.96e-21
rs2276682	cg09152259	0.0549371	10.4778	3.53e-21
rs73352129	cg23470227	-0.0503589	-10.423	5.21e-21
rs67740167	cg23470227	-0.0503589	-10.423	5.21e-21
rs78057960	cg23470227	-0.0503589	-10.423	5.21e-21
rs8076052	cg23470227	-0.0503589	-10.423	5.21e-21
rs2125345;rs558180280	cg23470227	-0.0503589	-10.423	5.21e-21
rs11652539	cg23470227	-0.0494952	-10.4211	5.28e-21
rs11652261	cg23470227	-0.0494952	-10.4211	5.28e-21
rs10928764	cg09152259	0.0548686	10.4018	6.06e-21
rs2090573	cg09152259	0.0548686	10.4018	6.06e-21
rs878371	cg23470227	-0.0486387	-10.3945	6.38e-21
rs11658385	cg23470227	-0.0488525	-10.3885	6.66e-21
rs1044059	cg20406979	0.0578898	10.3771	7.21e-21
rs6430937	cg09152259	0.0538634	10.3703	7.57e-21
rs1135688	cg23470227	-0.0486629	-10.362	8.03e-21
rs28578956	cg23470227	-0.0483531	-10.3265	1.03e-20
rs7225724	cg15815084	0.0979425	10.3038	1.21e-20
rs6503775	cg15815084	0.0979425	10.3038	1.21e-20
rs4365350	cg15815084	0.0979425	10.3038	1.21e-20
rs13429925	cg09152259	0.0532208	10.2777	1.46e-20
rs59027829	cg09152259	0.0534048	10.2279	2.07e-20
rs7584659	cg09152259	0.056152	10.2206	2.18e-20
rs6095747	cg00568296	-0.0930913	-10.2033	2.46e-20
rs2757042	cg20406979	0.057496	10.1895	2.71e-20
rs8071825	cg15815084	0.0999565	10.1801	2.9e-20
rs9892183	cg15815084	0.0999565	10.1801	2.9e-20
rs4789229	cg23470227	-0.0484299	-10.1719	3.07e-20
rs7218058	cg23470227	-0.0486536	-10.1346	3.99e-20
rs10221244	cg23470227	-0.0469685	-10.1157	4.56e-20
rs12600868	cg23470227	-0.0472246	-10.095	5.27e-20
rs8081539	cg23470227	-0.0476181	-10.0857	5.63e-20
rs398278	cg20406979	0.05781	10.0827	5.75e-20
rs364451	cg20406979	0.0575257	10.072	6.19e-20
rs55636440	cg23470227	-0.0476573	-10.0655	6.48e-20
rs2238645	cg02370334	-0.0543592	-10.0649	6.51e-20
rs78742057	cg20859453	-0.177985	-10.0505	7.2e-20
rs73645935	cg20859453	-0.177985	-10.0505	7.2e-20
rs6475024	cg20859453	-0.177985	-10.0505	7.2e-20
rs6091091	cg00568296	-0.0929445	-10.035	8.03e-20
rs239935	cg20406979	0.0575298	10.0346	8.05e-20
rs4300780	cg09152259	0.055126	10.0305	8.28e-20
rs12613252	cg09152259	0.055126	10.0305	8.28e-20
rs12613254	cg09152259	0.055126	10.0305	8.28e-20
rs13414676	cg09152259	0.055126	10.0305	8.28e-20
rs13390029	cg09152259	0.055126	10.0305	8.28e-20
rs13409933	cg09152259	0.055126	10.0305	8.28e-20
rs35757209	cg23470227	-0.0472733	-10.0274	8.46e-20
rs2061387	cg23470227	-0.0481255	-10.013	9.36e-20
rs7217432	cg23470227	-0.0481255	-10.013	9.36e-20
rs7216615	cg23470227	-0.048125	-10.0061	9.82e-20
rs1322077	cg20406979	0.0555498	10.0035	1e-19
rs4789227	cg23470227	-0.0472043	-9.993	1.08e-19
rs28807127	cg09152259	0.0543306	9.98763	1.12e-19
rs13017103	cg09152259	0.0543306	9.98763	1.12e-19
rs9457249	cg20406979	0.0554391	9.97496	1.22e-19
rs9457251	cg20406979	0.0554391	9.97496	1.22e-19
rs2149093	cg20406979	0.0571307	9.97453	1.22e-19
rs444988	cg20406979	0.0571307	9.97453	1.22e-19
rs408080	cg20406979	0.0571307	9.97453	1.22e-19
rs1794696	cg20406979	0.0571307	9.97453	1.22e-19
rs404222	cg20406979	0.0571307	9.97453	1.22e-19
rs34006114	cg09152259	0.0563523	9.9633	1.32e-19
rs11899601	cg09152259	0.0547279	9.95784	1.38e-19
rs10167294	cg09152259	0.0547279	9.95784	1.38e-19
rs4150434	cg09152259	0.0542134	9.95697	1.38e-19
rs12614320	cg09152259	0.0544281	9.95129	1.44e-19
rs7217536	cg23470227	-0.0476859	-9.94162	1.54e-19
rs7216512	cg23470227	-0.0476859	-9.94162	1.54e-19
rs12602430	cg23470227	-0.0476859	-9.94162	1.54e-19
rs12603812	cg23470227	-0.0476859	-9.94162	1.54e-19
rs9348211	cg20406979	0.0570257	9.93866	1.57e-19
rs6920364	cg20406979	0.0570257	9.93866	1.57e-19
rs2769352	cg20406979	0.0570257	9.93866	1.57e-19
rs1811120	cg20406979	0.0570257	9.93866	1.57e-19
rs427824	cg20406979	0.0570257	9.93866	1.57e-19
rs1143407	cg09152259	0.0540607	9.91882	1.81e-19
rs9717862	cg20406979	0.0569319	9.9175	1.82e-19
rs7221792	cg23470227	-0.0468272	-9.90698	1.96e-19
rs7223416	cg23470227	-0.0476194	-9.89453	2.14e-19
rs239934	cg20406979	0.0571388	9.88548	2.28e-19
rs8047999	cg22873414	0.0483769	9.86558	2.62e-19
rs3738948	cg09152259	0.05385	9.86477	2.63e-19
rs4150514	cg09152259	0.05385	9.86477	2.63e-19
rs58063879	cg09152259	0.05385	9.86477	2.63e-19
rs13403918	cg09152259	0.05385	9.86477	2.63e-19
rs12617858	cg09152259	0.05385	9.86477	2.63e-19
rs2134794	cg09152259	0.05385	9.86477	2.63e-19
rs4346838	cg20406979	0.0568875	9.85292	2.86e-19
rs2345572	cg20406979	0.0568875	9.85292	2.86e-19
rs3212701	cg02370334	-0.0530515	-9.85145	2.89e-19
rs16977599	cg12421287	0.0530293	9.83454	3.25e-19
rs6716392	cg09152259	0.0538842	9.81179	3.8e-19
rs2071556	cg09017117	0.0470233	9.72282	7.04e-19
rs10017705	cg27569037	0.0701099	9.71339	7.52e-19
rs4234892	cg27569037	0.0701099	9.71339	7.52e-19
rs4690807	cg27569037	0.0701099	9.71339	7.52e-19
rs11731244	cg27569037	0.0697079	9.6581	1.1e-18
rs9894244	cg23470227	-0.0481116	-9.6504	1.16e-18
rs9894291	cg23470227	-0.0481116	-9.6504	1.16e-18
rs35708549	cg09152259	0.0563769	9.6414	1.24e-18
rs13034157	cg09152259	0.0563769	9.6414	1.24e-18
rs8051462	cg22873414	0.0473758	9.63292	1.31e-18
rs3744006	cg23470227	-0.0482402	-9.61848	1.45e-18
rs9923	cg09152259	0.0543473	9.5982	1.66e-18
rs2238644	cg02370334	-0.0529191	-9.58326	1.84e-18
rs9459835	cg20406979	0.0532	9.57597	1.94e-18
rs6735779	cg09152259	0.0561197	9.57103	2.01e-18
rs9897048	cg23470227	-0.047609	-9.54572	2.39e-18
rs6929466	cg20406979	0.0531406	9.54446	2.41e-18
rs9459840	cg20406979	0.0531406	9.54446	2.41e-18
rs9459841	cg20406979	0.0531406	9.54446	2.41e-18
rs6904946	cg20406979	0.0531406	9.54446	2.41e-18
rs6900701	cg20406979	0.0531406	9.54446	2.41e-18
rs6923582	cg20406979	0.0531406	9.54446	2.41e-18
rs2237276	cg20406979	0.0531406	9.54446	2.41e-18
rs13195812	cg20406979	0.0531406	9.54446	2.41e-18
rs9295385	cg20406979	0.0531406	9.54446	2.41e-18
rs8074963	cg23470227	-0.0475692	-9.52554	2.74e-18
rs35171809	cg20406979	0.0523097	9.52143	2.82e-18
rs67771362	cg09152259	0.0557428	9.50927	3.07e-18
rs8067076	cg23470227	-0.0474631	-9.49998	3.27e-18
rs11684068	cg09152259	0.0550456	9.48888	3.53e-18
rs2139142	cg09152259	0.0550456	9.48888	3.53e-18
rs7970524	cg27246571	-0.0608739	-9.4827	3.68e-18
rs58875777	cg27569037	0.0612267	9.47891	3.77e-18
rs34703177	cg09152259	0.0560142	9.45285	4.51e-18
rs34441363	cg09152259	0.0560142	9.45285	4.51e-18
rs6738811	cg09152259	0.0560142	9.45285	4.51e-18
rs6752139	cg09152259	0.0560142	9.45285	4.51e-18
rs147898570	cg09152259	0.0560142	9.45285	4.51e-18
rs8100347	cg02370334	-0.0521464	-9.44891	4.64e-18
rs11655389	cg23470227	-0.0453635	-9.44603	4.73e-18
rs28836897	cg27569037	0.0697452	9.42056	5.63e-18
rs28875870	cg27569037	0.0697452	9.42056	5.63e-18
rs4588419	cg27569037	0.0697452	9.42056	5.63e-18
rs4690808	cg27569037	0.0697452	9.42056	5.63e-18
rs12619391	cg09152259	0.0547587	9.35504	8.8e-18
rs35103294	cg23470227	-0.043274	-9.35482	8.81e-18
rs2203894	cg15815084	0.0867061	9.34407	9.48e-18
rs4150506	cg09152259	0.0556648	9.33421	1.01e-17
rs1979215	cg23470227	-0.0452117	-9.30155	1.27e-17
rs62353271	cg27569037	0.0710556	9.29306	1.34e-17
rs9906591	cg12582317	0.05504	9.26667	1.6e-17
rs886925	cg12582317	0.05504	9.26667	1.6e-17
rs34601617	cg09152259	0.0538097	9.2637	1.64e-17
rs12526548	cg20406979	0.0514512	9.26269	1.65e-17
rs9459839	cg20406979	0.0514512	9.26269	1.65e-17
rs1894603	cg20406979	0.0514512	9.26269	1.65e-17
rs9459845	cg20406979	0.0514512	9.26269	1.65e-17
rs9457257	cg20406979	0.0514512	9.26269	1.65e-17
rs9459846	cg20406979	0.0514512	9.26269	1.65e-17
rs6456146	cg20406979	0.0514512	9.26269	1.65e-17
rs9295384	cg20406979	0.0514512	9.26269	1.65e-17
rs239933	cg20406979	0.0515007	9.22237	2.16e-17
rs4789155	cg02433148	0.0390956	9.21006	2.35e-17
rs9459842	cg20406979	0.0511735	9.20992	2.36e-17
rs7749278	cg20406979	0.0511735	9.20992	2.36e-17
rs2282861	cg20406979	0.0511735	9.20992	2.36e-17
rs2282860	cg20406979	0.0511735	9.20992	2.36e-17
rs2181059	cg20406979	0.0511735	9.20992	2.36e-17
rs2237277	cg20406979	0.0511735	9.20992	2.36e-17
rs9457258	cg20406979	0.0511735	9.20992	2.36e-17
rs10946205	cg20406979	0.0511735	9.20992	2.36e-17
rs6456143	cg20406979	0.0511089	9.19031	2.69e-17
rs6503769	cg15815084	0.0861485	9.18084	2.87e-17
rs12600529	cg15815084	0.0861485	9.18084	2.87e-17
rs6747862	cg09152259	0.053856	9.17281	3.03e-17
rs2237273	cg20406979	0.0512273	9.16964	3.09e-17
rs4150492	cg09152259	0.0541887	9.1546	3.42e-17
rs903202	cg22873414	0.0459579	9.14854	3.57e-17
rs1970872	cg15815084	0.0869189	9.11273	4.54e-17
rs3867602	cg15815084	0.0869189	9.11273	4.54e-17
rs2237275	cg20406979	0.0513439	9.09481	5.12e-17
rs2237274	cg20406979	0.0513439	9.09481	5.12e-17
rs6503768	cg15815084	0.0850697	9.07969	5.67e-17
rs2301436	cg20406979	0.0503374	9.02356	8.26e-17
rs1990231	cg12582317	0.0533205	8.99201	1.02e-16
rs9910446	cg12582317	0.0533205	8.99201	1.02e-16
rs12451748	cg12582317	0.0533205	8.99201	1.02e-16
rs12451753	cg12582317	0.0533205	8.99201	1.02e-16
rs12449409	cg12582317	0.0533205	8.99201	1.02e-16
rs7220397	cg12582317	0.0533205	8.99201	1.02e-16
rs8081251	cg12582317	0.0533205	8.99201	1.02e-16
rs386793608;rs1519976	cg22873414	0.0449935	8.99015	1.03e-16
rs768410	cg22873414	0.0449935	8.99015	1.03e-16
rs2540499	cg27246571	-0.0582845	-8.98886	1.04e-16
rs2540498	cg27246571	-0.0582845	-8.98886	1.04e-16
rs55913048	cg02893324	-0.0602171	-8.9574	1.29e-16
rs2332966	cg12582317	0.0529739	8.93203	1.52e-16
rs12477214	cg09152259	0.0456331	8.92513	1.6e-16
rs6428525	cg23747839	-0.0632608	-8.90763	1.79e-16
rs1850689	cg09152259	0.0455721	8.90484	1.83e-16
rs10484531	cg20406979	0.0515864	8.90188	1.86e-16
rs199612119;rs147968	cg22873414	0.0459769	8.89973	1.89e-16
rs71373396	cg15815084	0.0836193	8.88062	2.15e-16
rs13008440	cg09152259	0.0523312	8.87522	2.23e-16
rs56151459	cg02893324	-0.0596282	-8.87111	2.29e-16
rs13032010	cg02893324	-0.0596282	-8.87111	2.29e-16
rs376571402	cg20406979	0.0506218	8.86949	2.31e-16
rs386708545;rs200447952;rs79452434	cg20406979	0.0505861	8.86117	2.44e-16
rs10946203	cg20406979	0.0519413	8.83174	2.97e-16
rs9459836	cg20406979	0.0520135	8.81554	3.31e-16
rs12212247	cg20406979	0.0520964	8.81017	3.43e-16
rs935471	cg11878712	0.0494334	8.79697	3.74e-16
rs55894868	cg02893324	-0.0595623	-8.77802	4.24e-16
rs9457254	cg20406979	0.0515258	8.7773	4.26e-16
rs2237272	cg20406979	0.0515258	8.7773	4.26e-16
rs10455982	cg20406979	0.0515258	8.7773	4.26e-16
rs9459838	cg20406979	0.0513631	8.74145	5.4e-16
rs9457256	cg20406979	0.0512984	8.72986	5.83e-16
rs2742421	cg15361247	0.0447619	8.71017	6.64e-16
rs9877499	cg15361247	0.0446595	8.69816	7.19e-16
rs3791268	cg11878712	0.0500212	8.69806	7.2e-16
rs1060404	cg20406979	0.0511346	8.68927	7.63e-16
rs4710171	cg20406979	0.0511346	8.68927	7.63e-16
rs9457252	cg20406979	0.0511346	8.68927	7.63e-16
rs3752520	cg20406979	0.0511346	8.68927	7.63e-16
rs9459849	cg20406979	0.0511346	8.68927	7.63e-16
rs9457259	cg20406979	0.0511346	8.68927	7.63e-16
rs10946204	cg20406979	0.0511346	8.68927	7.63e-16
rs2742417	cg15361247	0.0443969	8.68791	7.69e-16
rs9905938	cg12582317	0.052306	8.68626	7.78e-16
rs8064970	cg12582317	0.052306	8.68626	7.78e-16
rs12990553	cg02893324	-0.0593393	-8.68562	7.81e-16
rs3769161	cg02893324	-0.0593393	-8.68562	7.81e-16
rs2251954	cg15361247	0.0443847	8.6847	7.86e-16
rs56084435	cg02893324	-0.0591586	-8.68289	7.95e-16
rs375004057	cg02893324	-0.0591586	-8.68289	7.95e-16
rs377400560	cg02893324	-0.0591586	-8.68289	7.95e-16
rs7134860	cg27246571	-0.060153	-8.67224	8.53e-16
rs7134975	cg27246571	-0.060153	-8.67224	8.53e-16
rs7306086	cg27246571	-0.060153	-8.67224	8.53e-16
rs61937880	cg27246571	-0.060153	-8.67224	8.53e-16
rs61937881	cg27246571	-0.060153	-8.67224	8.53e-16
rs2673035;rs142054397	cg15361247	0.0444377	8.6571	9.42e-16
rs4359587	cg09152259	0.0504821	8.65001	9.87e-16
rs17677343	cg27246571	-0.0599848	-8.64745	1e-15
rs2742420	cg15361247	0.0443993	8.64746	1e-15
rs2673051	cg15361247	0.0443993	8.64746	1e-15
rs2742422	cg15361247	0.0443993	8.64746	1e-15
rs2742423	cg15361247	0.0443993	8.64746	1e-15
rs17328701	cg15361247	0.0443993	8.64746	1e-15
rs1969624	cg15361247	0.0443993	8.64746	1e-15
rs1969625	cg15361247	0.0443993	8.64746	1e-15
rs1609553	cg15361247	0.0443993	8.64746	1e-15
rs1609554	cg15361247	0.0443993	8.64746	1e-15
rs2673058	cg15361247	0.0443993	8.64746	1e-15
rs2673057	cg15361247	0.0443993	8.64746	1e-15
rs2742426	cg15361247	0.0443993	8.64746	1e-15
rs2742427	cg15361247	0.0443993	8.64746	1e-15
rs2742429	cg15361247	0.0443993	8.64746	1e-15
rs2742430	cg15361247	0.0443993	8.64746	1e-15
rs2742431	cg15361247	0.0443993	8.64746	1e-15
rs2742432	cg15361247	0.0443993	8.64746	1e-15
rs2673056	cg15361247	0.0443993	8.64746	1e-15
rs9825559	cg15361247	0.0443993	8.64746	1e-15
rs9809868	cg15361247	0.0443993	8.64746	1e-15
rs9829631	cg15361247	0.0443993	8.64746	1e-15
rs1534875	cg15361247	0.0443993	8.64746	1e-15
rs1534876	cg15361247	0.0443993	8.64746	1e-15
rs2673047	cg15361247	0.0443993	8.64746	1e-15
rs2742438	cg15361247	0.0443993	8.64746	1e-15
rs2742439	cg15361247	0.0443993	8.64746	1e-15
rs938363;rs34519783	cg15361247	0.0443993	8.64746	1e-15
rs938362	cg15361247	0.0443993	8.64746	1e-15
rs1969626	cg15361247	0.0443993	8.64746	1e-15
rs2373047	cg15361247	0.0443993	8.64746	1e-15
rs2742441	cg15361247	0.0443993	8.64746	1e-15
rs2742442	cg15361247	0.0443993	8.64746	1e-15
rs2673038	cg15361247	0.0443993	8.64746	1e-15
rs2673037	cg15361247	0.0443993	8.64746	1e-15
rs2245705	cg15361247	0.0443993	8.64746	1e-15
rs1883096	cg15361247	0.0443993	8.64746	1e-15
rs2673036	cg15361247	0.0443993	8.64746	1e-15
rs2742445	cg15361247	0.0443993	8.64746	1e-15
rs1877934	cg15361247	0.0443993	8.64746	1e-15
rs1877933	cg15361247	0.0443993	8.64746	1e-15
rs1877932	cg15361247	0.0443993	8.64746	1e-15
rs2742369	cg15361247	0.0443993	8.64746	1e-15
rs2248991	cg15361247	0.0443993	8.64746	1e-15
rs2673034	cg15361247	0.0443993	8.64746	1e-15
rs2742385	cg15361247	0.0443993	8.64746	1e-15
rs2742389	cg15361247	0.0443993	8.64746	1e-15
rs2742390	cg15361247	0.0443993	8.64746	1e-15
rs2742393	cg15361247	0.0443993	8.64746	1e-15
rs2742373	cg15361247	0.0443993	8.64746	1e-15
rs2673025	cg15361247	0.0443865	8.64455	1.02e-15
rs2742452	cg15361247	0.0443865	8.64455	1.02e-15
rs2673065	cg15361247	0.0443736	8.64081	1.05e-15
rs2742462	cg15361247	0.0443736	8.64081	1.05e-15
rs3791264	cg11878712	0.0497749	8.63864	1.06e-15
rs11695371	cg11878712	0.0497749	8.63864	1.06e-15
rs11676854	cg11878712	0.0497749	8.63864	1.06e-15
rs7576554	cg11878712	0.0497749	8.63864	1.06e-15
rs7593036	cg11878712	0.0497749	8.63864	1.06e-15
rs6757621	cg11878712	0.0497749	8.63864	1.06e-15
rs57223057	cg11878712	0.0497749	8.63864	1.06e-15
rs7596803	cg11878712	0.0497749	8.63864	1.06e-15
rs36053895;rs386355408	cg02893324	-0.0581151	-8.63903	1.06e-15
rs2742368	cg15361247	0.0441929	8.63384	1.1e-15
rs2742418	cg15361247	0.0443509	8.63318	1.1e-15
rs2742419	cg15361247	0.0443509	8.63318	1.1e-15
rs2076857	cg02893324	-0.0581811	-8.63223	1.11e-15
rs10930579	cg02893324	-0.0582389	-8.593	1.44e-15
rs2742386	cg15361247	0.0438732	8.55867	1.8e-15
rs10023382	cg27569037	0.0567769	8.54095	2.02e-15
rs1109278	cg10065189	-0.0389036	-8.52223	2.28e-15
rs6800556	cg15361247	0.0440829	8.50769	2.51e-15
rs2660892	cg27246571	-0.0588999	-8.49135	2.79e-15
rs4793566	cg12582317	0.050805	8.4703	3.2e-15
rs7211686	cg12582317	0.050805	8.4703	3.2e-15
rs12949028	cg12582317	0.051601	8.46988	3.21e-15
rs12950062	cg12582317	0.051601	8.46988	3.21e-15
rs6426551	cg02280892	0.0730676	8.46627	3.28e-15
rs886926	cg12582317	0.0505396	8.43451	4.04e-15
rs7517174	cg02280892	0.0728364	8.4295	4.17e-15
rs2660891	cg27246571	-0.0587057	-8.37683	5.87e-15
rs2540488	cg27246571	-0.0571115	-8.36287	6.42e-15
rs7212186	cg12582317	0.0505042	8.35114	6.93e-15
rs2673052	cg15361247	0.0437319	8.31924	8.52e-15
rs2673033	cg15361247	0.0430901	8.31208	8.92e-15
rs2247304	cg27246571	-0.0565595	-8.29141	1.02e-14
rs2660838	cg27246571	-0.0578794	-8.27907	1.1e-14
rs6668851	cg02280892	0.0704597	8.27534	1.13e-14
rs71343622	cg09152259	0.0561282	8.26243	1.23e-14
rs2540493	cg27246571	-0.0576692	-8.26139	1.24e-14
rs6702917	cg02280892	0.0716266	8.24137	1.41e-14
rs4793912	cg12582317	0.0502489	8.22964	1.52e-14
rs2540497	cg27246571	-0.0573655	-8.21664	1.65e-14
rs2660900	cg27246571	-0.0573655	-8.21664	1.65e-14
rs2251021	cg15361247	-0.0429098	-8.21498	1.66e-14
rs7297245	cg27246571	-0.0621758	-8.13357	2.8e-14
rs10018252	cg27569037	0.0570133	8.12757	2.91e-14
rs6456150	cg20406979	0.0459614	8.11786	3.1e-14
rs10745746	cg27246571	-0.0625088	-8.0917	3.66e-14
rs4762659	cg27246571	-0.0625088	-8.0917	3.66e-14
rs6909180	cg20406979	0.0460174	8.08983	3.7e-14
rs12213683	cg20406979	0.0460174	8.08983	3.7e-14
rs12529876	cg20406979	0.0460174	8.08983	3.7e-14
rs12528323	cg20406979	0.0460174	8.08983	3.7e-14
rs12528689	cg20406979	0.0460174	8.08983	3.7e-14
rs13208636	cg20406979	0.0460174	8.08983	3.7e-14
rs7966537	cg27246571	-0.0622177	-8.08667	3.78e-14
rs17676451	cg27246571	-0.0622177	-8.08667	3.78e-14
rs6932740	cg20406979	0.0457943	8.08304	3.86e-14
rs6934043	cg20406979	0.0457943	8.08304	3.86e-14
rs1358882	cg20406979	0.0457943	8.08304	3.86e-14
rs1358883	cg20406979	0.0457943	8.08304	3.86e-14
rs9457261	cg20406979	0.0457943	8.08304	3.86e-14
rs1407315	cg20406979	0.0457943	8.08304	3.86e-14
rs12527827	cg20406979	0.0457943	8.08304	3.86e-14
rs12529959	cg20406979	0.0457943	8.08304	3.86e-14
rs6909475	cg20406979	0.0457943	8.08304	3.86e-14
rs6909502	cg20406979	0.0457943	8.08304	3.86e-14
rs12523712	cg20406979	0.0457943	8.08304	3.86e-14
rs911632	cg20406979	0.0457943	8.08304	3.86e-14
rs1810644	cg20406979	0.0457943	8.08304	3.86e-14
rs1810645	cg20406979	0.0457943	8.08304	3.86e-14
rs2017338	cg20406979	0.0457943	8.08304	3.86e-14
rs6456151	cg20406979	0.0457943	8.08304	3.86e-14
rs6456153	cg20406979	0.0457943	8.08304	3.86e-14
rs6456154	cg20406979	0.0457943	8.08304	3.86e-14
rs12203510	cg20406979	0.0457943	8.08304	3.86e-14
rs13195158	cg20406979	0.0457943	8.08304	3.86e-14
rs2187859	cg20406979	0.0457943	8.08304	3.86e-14
rs9457266	cg20406979	0.0457943	8.08304	3.86e-14
rs7750209	cg20406979	0.0457943	8.08304	3.86e-14
rs7746628	cg20406979	0.0457943	8.08304	3.86e-14
rs4598049	cg20406979	0.0457943	8.08304	3.86e-14
rs2345753	cg20406979	0.0457943	8.08304	3.86e-14
rs2345754	cg20406979	0.0457943	8.08304	3.86e-14
rs7761977	cg20406979	0.0457943	8.08304	3.86e-14
rs7742305	cg20406979	0.0457943	8.08304	3.86e-14
rs7762156	cg20406979	0.0457943	8.08304	3.86e-14
rs2001115	cg20406979	0.0457943	8.08304	3.86e-14
rs9459862	cg20406979	0.0457943	8.08304	3.86e-14
rs6456149	cg20406979	0.0459786	8.08237	3.88e-14
rs2181058	cg20406979	0.0459786	8.08237	3.88e-14
rs12529238	cg20406979	0.0459786	8.08237	3.88e-14
rs7748224	cg20406979	0.0461348	8.07938	3.96e-14
rs2673049	cg15361247	-0.0436673	-8.07656	4.03e-14
rs2742392	cg15361247	-0.0436673	-8.07656	4.03e-14
rs2742447	cg15361247	-0.0436673	-8.07656	4.03e-14
rs12633747	cg15361247	-0.043666	-8.07603	4.04e-14
rs13008554	cg02893324	-0.0547353	-8.0708	4.18e-14
rs17761169	cg02893324	-0.0544915	-8.06537	4.32e-14
rs2069918	cg09152259	0.0473831	8.05244	4.69e-14
rs2673053	cg15361247	-0.0471145	-8.04148	5.03e-14
rs2742424	cg15361247	-0.0471145	-8.04148	5.03e-14
rs2742433	cg15361247	-0.0471145	-8.04148	5.03e-14
rs2028382	cg02893324	-0.0527717	-8.03875	5.12e-14
rs3769167	cg02893324	-0.0544485	-8.02882	5.45e-14
rs2289399	cg02893324	-0.0542186	-8.01942	5.79e-14
rs6936261	cg20406979	0.0454638	8.01716	5.87e-14
rs13210649	cg20406979	0.0454638	8.01716	5.87e-14
rs12213801	cg20406979	0.0454638	8.01716	5.87e-14
rs9457265	cg20406979	0.0454638	8.01716	5.87e-14
rs9459853	cg20406979	0.0456453	8.01566	5.93e-14
rs17733203	cg27246571	-0.0615458	-8.00655	6.28e-14
rs73216216	cg27246571	-0.0615458	-8.00655	6.28e-14
rs56361316	cg27246571	-0.0615458	-8.00655	6.28e-14
rs767280	cg15361247	-0.0428832	-8.00513	6.33e-14
rs3754741	cg02893324	-0.0541514	-8.00519	6.33e-14
rs1468543	cg15361247	-0.0428823	-8.00484	6.35e-14
rs2742406	cg15361247	-0.0428818	-8.00468	6.35e-14
rs9311378	cg15361247	-0.0428818	-8.00468	6.35e-14
rs2742454	cg15361247	-0.0428818	-8.00468	6.35e-14
rs2742435	cg15361247	-0.0428814	-8.00458	6.36e-14
rs2742436	cg15361247	-0.0428814	-8.00458	6.36e-14
rs2742437	cg15361247	-0.0428814	-8.00458	6.36e-14
rs2673039	cg15361247	-0.0428814	-8.00458	6.36e-14
rs2249357	cg15361247	-0.0428814	-8.00458	6.36e-14
rs2742397	cg15361247	-0.0428814	-8.00458	6.36e-14
rs2673028	cg15361247	-0.0428814	-8.00458	6.36e-14
rs9821974;rs71622516	cg15361247	-0.0428814	-8.00458	6.36e-14
rs56396137	cg27246571	-0.0622939	-7.98071	7.39e-14

## Sheet: CD-CpGs in Replication Bon
The blood cis-mQTLs detected for 977 CD associated CpGs from Somineni et al. 2019 in replication cohort with 780 adult African American samples
SNP	CpGs	Beta	t-stat	pvalue
rs2772435	cg06097048	0.0589718	19.4244	1.16748e-68
rs2807759	cg06097048	0.0589718	19.4244	1.16748e-68
rs332121	cg06097048	0.0589718	19.4244	1.16748e-68
rs332124	cg06097048	0.0589718	19.4244	1.16748e-68
rs332126	cg06097048	0.0589718	19.4244	1.16748e-68
rs332128	cg06097048	0.0589718	19.4244	1.16748e-68
rs231202	cg06097048	0.0589718	19.4244	1.16748e-68
rs332131	cg06097048	0.0589718	19.4244	1.16748e-68
rs332134	cg06097048	0.0589718	19.4244	1.16748e-68
rs332137	cg06097048	0.0589718	19.4244	1.16748e-68
rs332139	cg06097048	0.0589718	19.4244	1.16748e-68
rs332140	cg06097048	0.0589718	19.4244	1.16748e-68
rs332142	cg06097048	0.0589718	19.4244	1.16748e-68
rs332143	cg06097048	0.0589718	19.4244	1.16748e-68
rs332146	cg06097048	0.0589718	19.4244	1.16748e-68
rs332151	cg06097048	0.0589621	19.4154	1.3132e-68
rs332152	cg06097048	0.0587319	19.2665	9.13859e-68
rs332177	cg06097048	0.0588502	19.2488	1.15171e-67
rs332178	cg06097048	0.0588502	19.2488	1.15171e-67
rs332183	cg06097048	0.0588502	19.2488	1.15171e-67
rs332154	cg06097048	0.0588369	19.2364	1.35252e-67
rs332156	cg06097048	0.0588369	19.2364	1.35252e-67
rs332161	cg06097048	0.0588369	19.2364	1.35252e-67
rs332162	cg06097048	0.0588369	19.2364	1.35252e-67
rs332168	cg06097048	0.0588369	19.2364	1.35252e-67
rs332172	cg06097048	0.0588369	19.2364	1.35252e-67
rs332158	cg06097048	0.0589031	19.1512	4.09602e-67
rs332181	cg06097048	0.0587802	19.1277	5.55915e-67
rs332186	cg06097048	0.0586749	19.1129	6.73374e-67
rs332187	cg06097048	0.0586749	19.1129	6.73374e-67
rs2807763	cg06097048	0.0566312	18.7969	4.02094e-65
rs2486639	cg06097048	0.0565415	18.7698	5.70472e-65
rs998362	cg06097048	0.0565415	18.7698	5.70472e-65
rs2993990	cg06097048	0.056084	18.5072	1.67274e-63
rs2153300	cg06097048	0.0560922	18.43	4.50428e-63
rs2790448	cg06097048	0.0558462	18.3987	6.72124e-63
rs2807734	cg06097048	0.0558462	18.3987	6.72124e-63
rs2095901	cg06097048	0.0558462	18.3987	6.72124e-63
rs332189	cg06097048	0.0585362	18.3779	8.77779e-63
rs332132	cg06097048	0.0508168	17.3759	2.82433e-57
rs3121059	cg06097048	0.0513757	17.0704	1.27006e-55
rs946594	cg06097048	0.0511125	16.9593	5.03626e-55
rs1416817	cg06097048	0.0511125	16.9593	5.03626e-55
rs2998285	cg06097048	0.0511125	16.9593	5.03626e-55
rs4237390	cg06097048	0.0511125	16.9593	5.03626e-55
rs2486637	cg06097048	0.0511125	16.9593	5.03626e-55
rs2993980	cg06097048	0.0511125	16.9593	5.03626e-55
rs332191	cg06097048	0.054738	16.7283	8.70628e-54
rs332194	cg06097048	0.0527009	16.6004	4.18917e-53
rs2807738	cg06097048	0.0398152	14.9137	2.35591e-44
rs2807740	cg06097048	0.0398283	14.9129	2.37792e-44
rs2807737	cg06097048	0.039761	14.8921	3.02937e-44
rs2790460	cg06097048	0.0362892	13.8635	3.66237e-39
rs332165	cg06097048	0.0360255	13.4243	4.66661e-37
rs332113	cg06097048	0.0385085	13.3693	8.50455e-37
rs332127	cg06097048	0.0357925	13.3346	1.24104e-36
rs2486636	cg06097048	0.0351082	13.103	1.52265e-35
rs2486635	cg06097048	0.0350681	13.0791	1.97099e-35
rs2486640	cg06097048	0.0342253	12.8497	2.29227e-34
rs73595532	cg10368935	0.0788792	12.8448	2.41445e-34
rs2772436	cg06097048	0.0402216	12.7973	3.99859e-34
rs1034087	cg06097048	0.0400701	12.7698	5.3536e-34
rs332114	cg06097048	0.0383081	12.7535	6.36313e-34
rs11258046	cg07091793	0.0525485	12.7108	9.99266e-34
rs332130	cg06097048	0.0331269	12.7081	1.02755e-33
rs1272396	cg06097048	0.0399301	12.6858	1.30127e-33
rs12256344	cg07091793	0.052289	12.6617	1.67783e-33
rs78770626	cg07091793	0.0521751	12.6109	2.86219e-33
rs12251586	cg07091793	0.0521751	12.6109	2.86219e-33
rs12256290	cg07091793	0.0521751	12.6109	2.86219e-33
rs1755205	cg06097048	0.0390462	12.5567	5.05361e-33
rs542007	cg19208876	-0.0361511	-12.4639	1.3342e-32
rs2185293	cg06097048	0.0322926	12.3456	4.56506e-32
rs2807732	cg06097048	0.0322926	12.3456	4.56506e-32
rs2790436	cg06097048	0.0322926	12.3456	4.56506e-32
rs2807730	cg06097048	0.0322926	12.3456	4.56506e-32
rs2993991	cg06097048	0.0322926	12.3456	4.56506e-32
rs2998283	cg06097048	0.0322926	12.3456	4.56506e-32
rs2993992	cg06097048	0.0322926	12.3456	4.56506e-32
rs2491251	cg06097048	0.0322926	12.3456	4.56506e-32
rs2807728	cg06097048	0.0322926	12.3456	4.56506e-32
rs1339704	cg06097048	0.0322926	12.3456	4.56506e-32
rs2993986	cg06097048	0.0317951	12.1119	5.06858e-31
rs2993987	cg06097048	0.0317951	12.1119	5.06858e-31
rs2790447	cg06097048	0.0317951	12.1119	5.06858e-31
rs2993989	cg06097048	0.0317951	12.1119	5.06858e-31
rs2807742	cg06097048	0.0305862	11.9442	2.79879e-30
rs5784065	cg06097048	0.0309957	11.8171	1.01026e-29
rs2993981	cg06097048	0.0309746	11.6997	3.28296e-29
rs2993982	cg06097048	0.0309746	11.6997	3.28296e-29
rs76372386	cg07091793	0.0546135	11.6944	3.46043e-29
rs74360523	cg06097048	0.050324	11.6924	3.5303e-29
rs11258011	cg07091793	0.0472205	11.6782	4.06852e-29
rs2993985	cg06097048	0.0305939	11.6579	4.98172e-29
rs75561131	cg06097048	0.0485395	11.6281	6.70831e-29
rs74595315	cg07091793	0.0532123	11.6062	8.33633e-29
rs78001383	cg07091793	0.0532123	11.6062	8.33633e-29
rs332195	cg06097048	0.0350412	11.6013	8.75491e-29
rs11258006	cg07091793	0.0468066	11.5816	1.06463e-28
rs1416816	cg06097048	0.0306684	11.5746	1.14113e-28
rs2486638	cg06097048	0.0306684	11.5746	1.14113e-28
rs3006785	cg14640477	0.0346064	11.3752	8.16084e-28
rs2807735	cg06097048	0.0296992	11.3677	8.7833e-28
rs332173	cg06097048	0.0272164	10.9509	4.95927e-26
rs332174	cg06097048	0.0272164	10.9509	4.95927e-26
rs332182	cg06097048	0.0271767	10.9343	5.8071e-26
rs167967	cg06097048	0.0271767	10.9343	5.8071e-26
rs1005762	cg07091793	0.0473704	10.8012	2.05597e-25
rs1005763	cg07091793	0.0473704	10.8012	2.05597e-25
rs1005764	cg07091793	0.0470816	10.7486	3.37863e-25
rs78104842	cg07091793	0.0470816	10.7486	3.37863e-25
rs12098455	cg07091793	0.0470816	10.7486	3.37863e-25
rs1557107	cg07091793	0.0470816	10.7486	3.37863e-25
rs1557104	cg07091793	0.0470816	10.7486	3.37863e-25
rs12250330	cg07091793	0.0470816	10.7486	3.37863e-25
rs12241717	cg07091793	0.0470816	10.7486	3.37863e-25
rs59737591	cg26404226	0.0507701	10.7343	3.86507e-25
rs66478243	cg26404226	0.0507701	10.7343	3.86507e-25
rs12241401	cg26404226	0.0507701	10.7343	3.86507e-25
rs57807025	cg26404226	0.0507701	10.7343	3.86507e-25
rs56104559	cg26404226	0.0507701	10.7343	3.86507e-25
rs11202897	cg26404226	0.0507701	10.7343	3.86507e-25
rs11202898	cg26404226	0.0507701	10.7343	3.86507e-25
rs11202899	cg26404226	0.0507701	10.7343	3.86507e-25
rs12250469	cg07091793	0.0470159	10.7063	5.02618e-25
rs12249235	cg07091793	0.0470159	10.7063	5.02618e-25
rs111952136	cg07091793	0.0470159	10.7063	5.02618e-25
rs12247470	cg07091793	0.0463931	10.5764	1.695e-24
rs10826477	cg06097048	0.0259837	10.5371	2.4413e-24
rs332112	cg06097048	0.0288842	10.5216	2.81928e-24
chr10:26734815	cg14640477	0.0354849	10.5177	2.92245e-24
chr10:26734817	cg14640477	0.0354849	10.5177	2.92245e-24
rs332157	cg06097048	0.0260427	10.4876	3.86391e-24
rs1557106	cg07091793	0.0437945	10.4051	8.27256e-24
rs332169	cg06097048	0.025087	10.3022	2.12464e-23
rs332170	cg06097048	0.025087	10.3022	2.12464e-23
rs332188	cg06097048	0.0247843	10.2946	2.27633e-23
rs2491252	cg06097048	0.0247252	10.2871	2.43858e-23
rs2790438	cg06097048	0.0247252	10.2871	2.43858e-23
rs1072523	cg06097048	0.0247252	10.2871	2.43858e-23
rs332145	cg06097048	0.0249134	10.1797	6.47317e-23
rs332150	cg06097048	0.0249134	10.1797	6.47317e-23
rs332133	cg06097048	0.025172	10.178	6.57249e-23
rs2807757	cg06097048	0.0248793	10.1654	7.36769e-23
rs332123	cg06097048	0.0248793	10.1654	7.36769e-23
rs332138	cg06097048	0.0248793	10.1654	7.36769e-23
rs332179	cg06097048	0.0242814	10.1522	8.30208e-23
rs332149	cg06097048	0.0248047	10.1195	1.11505e-22
rs2807731	cg06097048	0.0237079	10.1167	1.14347e-22
rs76239564	cg07091793	0.0425093	10.1118	1.19476e-22
rs2807760	cg06097048	0.0247709	10.1053	1.26639e-22
rs7086169	cg06097048	0.0477107	10.0635	1.84485e-22
rs332136	cg06097048	0.0246621	10.0614	1.8797e-22
rs10735667	cg22827965	-0.0573943	-10.0228	2.65591e-22
rs913821	cg06097048	0.023441	9.91821	6.7489e-22
rs332119	cg06097048	0.023441	9.91821	6.7489e-22
rs2993993	cg06097048	0.0232534	9.89255	8.47367e-22
rs2790440	cg06097048	0.0233392	9.8831	9.21321e-22
rs332171	cg06097048	0.0233432	9.87948	9.51333e-22
rs7079666	cg22827965	-0.0559977	-9.82692	1.51351e-21
rs2814445	cg22827965	-0.0563184	-9.78802	2.13156e-21
rs7094339	cg07091793	0.0426505	9.74964	2.98531e-21
rs2807761	cg06097048	0.0229056	9.68307	5.34195e-21
rs2998284	cg06097048	0.0227539	9.67949	5.51124e-21
rs2790461	cg06097048	0.023369	9.64274	7.58887e-21
rs74582187	cg07091793	0.0372767	9.56106	1.53975e-20
rs10781583	cg22827965	-0.0558279	-9.54136	1.82504e-20
rs2790450	cg06097048	0.0225298	9.46779	3.43467e-20
rs1277765	cg10368935	0.0473805	9.40257	5.99758e-20
rs7905590	cg22827965	-0.0568422	-9.37554	7.54961e-20
rs7915393	cg26404226	0.0385495	9.36485	8.26778e-20
rs945944	cg22827965	-0.0565979	-9.35763	8.7906e-20
rs945945	cg22827965	-0.0565979	-9.35763	8.7906e-20
rs1034086	cg06097048	0.0254345	9.35223	9.20339e-20
rs2767426	cg22827965	-0.0519489	-9.28458	1.63166e-19
rs2804001	cg22827965	-0.0515074	-9.26749	1.88463e-19
rs11591231	cg26404226	0.0409782	9.21457	2.94126e-19
rs2492770	cg22827965	-0.0551997	-9.07109	9.73262e-19
rs11202908	cg26404226	0.0457627	9.03883	1.27117e-18
rs7091551	cg18759809	0.0209181	8.95811	2.47169e-18
rs2786887	cg22827965	-0.0543717	-8.94407	2.77329e-18
rs2819715	cg22827965	-0.0543717	-8.94407	2.77329e-18
rs2814453	cg22827965	-0.0543717	-8.94407	2.77329e-18
rs1265834	cg06097048	0.0229194	8.93691	2.941e-18
rs74439920	cg18759809	0.0208773	8.92412	3.26553e-18
rs73364893	cg26404226	0.0455752	8.83262	6.88422e-18
rs12241898	cg26404226	0.0452905	8.78516	1.01113e-17
rs11814250	cg18759809	0.0194846	8.78219	1.03567e-17
rs7086143	cg22827965	-0.0520626	-8.71041	1.84635e-17
rs1265842	cg06097048	0.0224036	8.70633	1.90773e-17
rs7910850	cg22827965	-0.0522326	-8.6673	2.60794e-17
rs7914822	cg22827965	-0.0522326	-8.6673	2.60794e-17
rs116614987	cg18759809	0.0198959	8.64933	3.01069e-17
rs10508303	cg07091793	0.0369508	8.6372	3.31661e-17
rs332192	cg06097048	0.037976	8.61843	3.85156e-17
rs12264805	cg20270840	0.0356272	8.55394	6.42593e-17
rs7094522	cg22827965	-0.0503246	-8.51928	8.44947e-17
rs12257303	cg20270840	0.0353841	8.50623	9.36465e-17
rs332144	cg06097048	0.0200285	8.46637	1.28121e-16
rs77572290	cg18759809	0.0195634	8.45524	1.39806e-16
rs16931381	cg18759809	0.0195634	8.45524	1.39806e-16
rs77162406	cg18759809	0.0196335	8.43574	1.62873e-16
rs60176626	cg20270840	0.0351358	8.43157	1.68281e-16
rs332129	cg06097048	0.0200234	8.4243	1.7812e-16
rs2767423	cg22827965	-0.0501354	-8.40631	2.04987e-16
rs11202902	cg26404226	0.0466547	8.36018	2.93576e-16
rs10826484	cg06097048	0.038279	8.24921	6.91995e-16
rs74926020	cg18759809	0.0210665	8.22219	8.51448e-16
rs73595550	cg10368935	0.0616422	8.20383	9.79982e-16
rs7098235	cg26404226	0.0329782	8.15289	1.44562e-15
rs675678	cg06097048	0.0377364	8.15268	1.44793e-15
rs2147416	cg26404226	0.039782	8.14453	1.5405e-15
rs76965718	cg22827965	-0.047482	-8.13787	1.6205e-15
rs2786905	cg22827965	-0.0437747	-8.12474	1.79052e-15
rs7085698	cg26404226	0.0328388	8.11496	1.92832e-15
rs2804000	cg22827965	-0.0408993	-8.08675	2.38757e-15
rs113150703	cg18759809	0.0185763	8.03931	3.41504e-15
rs113153830	cg18759809	0.0201091	8.00623	4.3784e-15
rs77688450	cg18759809	0.0201091	8.00623	4.3784e-15
rs676146	cg06097048	0.0209387	8.00329	4.47628e-15
rs529426	cg19208876	-0.0231632	-7.99238	4.85744e-15
rs76200132	cg18759809	0.0186145	7.99223	4.86293e-15
rs11201916	cg15342448	-0.0185004	-7.98229	5.23846e-15
rs1265838	cg06097048	0.0210245	7.9696	5.75993e-15
rs561336	cg19208876	-0.0228336	-7.92703	7.91143e-15
rs1265841	cg06097048	0.0193881	7.92617	7.9623e-15
rs74393935	cg26404226	0.0455644	7.90878	9.06128e-15
rs28436069	cg22827965	-0.0443502	-7.885	1.08085e-14
rs114731269	cg18759809	0.0169296	7.88347	1.09316e-14
rs11146421	cg22827965	-0.0512721	-7.85715	1.32815e-14
rs12243287	cg07091793	0.0381598	7.85034	1.39663e-14
rs77347073	cg18759809	0.0184515	7.84367	1.46704e-14
rs192947836	cg18759809	0.0184515	7.84367	1.46704e-14
rs12267364	cg22827965	0.0515099	7.82765	1.65089e-14
rs16931411	cg18759809	0.0173722	7.82717	1.65669e-14
rs16934419	cg19208876	-0.0285117	-7.82489	1.68481e-14
rs572215	cg19208876	-0.0227871	-7.77469	2.43559e-14
rs12354973	cg22827965	-0.0507939	-7.75084	2.89958e-14
rs74461648m	cg18759809	0.0181908	7.74534	3.01843e-14
rs11146422	cg22827965	-0.0506869	-7.73209	3.32481e-14
rs16931409	cg18759809	0.0180989	7.71871	3.66502e-14
rs11202901	cg26404226	0.0448252	7.71467	3.77451e-14
rs7090631	cg26404226	0.0312846	7.71375	3.79979e-14
rs547163	cg19208876	-0.0222756	-7.6779	4.92956e-14
rs75415543	cg18759809	0.0199236	7.67624	4.98929e-14
rs115142394	cg18759809	0.0184082	7.66928	5.24714e-14
rs113569821	cg18759809	0.0193075	7.63874	6.54312e-14
rs547212	cg19208876	-0.0221207	-7.63545	6.70055e-14
rs477597	cg19208876	-0.0221207	-7.63545	6.70055e-14
rs13328817	cg18759809	0.0181691	7.6196	7.5112e-14
rs111939752	cg18759809	0.0181691	7.6196	7.5112e-14
rs80354427	cg07091793	0.0364187	7.61546	7.73856e-14
rs10769150	cg03700417	-0.116639	-45.7112	3.41102e-221
rs1873057	cg03700417	-0.110135	-33.5422	1.53076e-152
rs10769151	cg03700417	-0.101145	-29.1706	1.91391e-126
rs2753412	cg19566482	0.0750435	23.6229	3.89442e-93
rs7111000	cg03700417	-0.0984999	-23.2515	6.26785e-91
rs2761211	cg19566482	0.0727789	22.8575	1.35487e-88
rs1488667	cg03700417	0.0816988	22.1644	1.65954e-84
rs2761207	cg19566482	0.0720735	20.9949	1.13056e-77
rs2761206	cg19566482	0.074315	20.8623	6.6363e-77
rs78861487	cg03700417	-0.0961096	-18.8047	3.63947e-65
rs2370794	cg02763813	-0.0560444	-18.6528	2.57621e-64
rs2198151	cg03700417	-0.0694805	-17.7277	3.39762e-59
rs2753413	cg19566482	0.0563123	17.3856	2.50102e-57
rs1530867	cg03700417	-0.0721661	-17.1426	5.18327e-56
rs1530868	cg03700417	-0.0721661	-17.1426	5.18327e-56
rs1825934	cg03700417	-0.0675577	-17.1351	5.6903e-56
rs7943329	cg19566482	0.0530368	17.0572	1.49602e-55
rs11032250	cg19566482	-0.0559949	-16.5692	6.136e-53
rs1157786	cg03700417	0.0694077	16.4102	4.28317e-52
rs16924272	cg19566482	-0.0558235	-16.3408	9.96882e-52
rs12293290	cg19566482	-0.0556663	-16.3317	1.11328e-51
rs12280218	cg19566482	-0.0556351	-16.325	1.20862e-51
rs11822933	cg19566482	-0.0550723	-16.3135	1.38877e-51
rs12285598	cg19566482	-0.0559096	-16.3129	1.39971e-51
rs11032254	cg19566482	-0.0559096	-16.3129	1.39971e-51
rs11032251	cg19566482	-0.0553408	-16.204	5.24522e-51
rs12274850	cg19566482	-0.0545514	-16.1779	7.20375e-51
rs16924246	cg19566482	-0.0545514	-16.1779	7.20375e-51
rs12278760	cg19566482	-0.0547427	-16.1689	8.03095e-51
rs61885699	cg07675998	-0.0411255	-16.1073	1.69169e-50
rs61885700	cg07675998	-0.0410358	-16.0591	3.02485e-50
rs996122	cg03700417	0.0683171	15.5281	1.73736e-47
rs12295788	cg19566482	-0.0529946	-15.4451	4.64329e-47
rs16924279	cg19566482	-0.0533922	-15.4144	6.67477e-47
rs57702339	cg19566482	-0.0531937	-15.3815	9.8476e-47
rs11032252	cg19566482	-0.0532968	-15.3338	1.72814e-46
rs77552387	cg03700417	-0.0885401	-15.2285	5.96487e-46
rs12417141	cg19566482	0.0483251	14.9435	1.66786e-44
rs2863703	cg03700417	-0.063012	-14.2879	3.10132e-41
rs75103784	cg20031708	-0.0531792	-14.0316	5.58768e-40
rs112435016	cg20031708	-0.0531792	-14.0316	5.58768e-40
rs61103107	cg20031708	-0.0529015	-13.8565	3.95681e-39
rs79246250	cg20031708	-0.0529509	-13.816	6.2163e-39
rs73586881	cg20031708	-0.0525962	-13.7339	1.54651e-38
rs2615922	cg19566482	0.0458633	13.7	2.24861e-38
rs60011391	cg20031708	-0.0524853	-13.6931	2.42873e-38
rs61373296	cg20031708	-0.0524853	-13.6931	2.42873e-38
rs2615924	cg19566482	0.0458118	13.6848	2.66288e-38
rs58911382	cg20031708	-0.0525542	-13.6272	5.02969e-38
rs59892297	cg20031708	-0.0525542	-13.6272	5.02969e-38
rs59037594	cg20031708	-0.0519345	-13.4688	2.86699e-37
rs57359524	cg20031708	-0.0519345	-13.4688	2.86699e-37
rs4755995	cg03700417	0.060284	13.4578	3.23396e-37
rs1157785	cg03700417	-0.0915354	-13.2028	5.18692e-36
rs10769152	cg03700417	-0.091877	-13.099	1.59084e-35
rs56262652	cg03700417	-0.0737974	-13.0819	1.91083e-35
rs1157784	cg03700417	-0.0913789	-12.9833	5.51072e-35
rs1906585	cg03700417	-0.0747341	-12.9657	6.64999e-35
rs12364661	cg03700417	-0.0747041	-12.964	6.77032e-35
rs12291056	cg19566482	0.0631603	12.9082	1.22834e-34
rs2761209	cg19566482	0.0637402	12.6838	1.32924e-33
rs11032246	cg19566482	-0.04888	-12.6273	2.40994e-33
rs80329539	cg03700417	-0.0720055	-12.5397	6.04204e-33
rs149472147	cg03700417	-0.0720055	-12.5397	6.04204e-33
rs16938268	cg03700417	-0.0720055	-12.5397	6.04204e-33
rs11038480	cg03700417	0.0538197	12.4688	1.26691e-32
rs1565222	cg03700417	0.0535011	12.3895	2.8953e-32
rs901900	cg03700417	0.0535011	12.3895	2.8953e-32
rs2057498	cg19566482	0.0605034	12.3821	3.12619e-32
rs2863700	cg03700417	0.0532408	12.2946	7.74121e-32
rs4755984	cg03700417	0.0571925	12.2713	9.84895e-32
rs4369419	cg02763813	-0.0392271	-11.9977	1.62545e-30
rs896338	cg03700417	0.0523706	11.9953	1.66495e-30
rs79515887	cg03700417	-0.0840348	-11.9486	2.67534e-30
rs896345	cg03700417	-0.0727085	-11.9039	4.20941e-30
rs59517129	cg03700417	-0.0833089	-11.8543	6.94795e-30
rs10769154	cg03700417	0.0553112	11.8328	8.62668e-30
rs896340	cg03700417	-0.0532145	-11.8271	9.13784e-30
rs896339	cg03700417	-0.0532145	-11.8271	9.13784e-30
rs114598153	cg03700417	-0.0830891	-11.8162	1.01959e-29
rs10838477	cg03700417	0.0555746	11.8134	1.04887e-29
rs4755997	cg03700417	0.0552748	11.744	2.10654e-29
rs2863701	cg03700417	-0.0529313	-11.7311	2.39667e-29
rs901902	cg03700417	-0.0529313	-11.7311	2.39667e-29
rs901903	cg03700417	-0.0529313	-11.7311	2.39667e-29
rs4930404	cg07675998	-0.0290819	-11.6821	3.91382e-29
rs4244816	cg07675998	-0.0290336	-11.6782	4.06947e-29
rs10769153	cg03700417	0.0521247	11.6719	4.33108e-29
rs1948170	cg03700417	-0.0663107	-11.6568	5.0362e-29
rs7112352	cg03700417	-0.0779756	-11.6475	5.52918e-29
rs4755996	cg03700417	0.0517175	11.5963	9.20187e-29
rs1844150	cg03700417	-0.0655466	-11.5489	1.47244e-28
rs77310869	cg03700417	-0.0836771	-11.481	2.88269e-28
rs2615920	cg19566482	-0.0430779	-11.469	3.2458e-28
rs80035635	cg03700417	-0.0822845	-11.4132	5.62139e-28
rs16938256	cg03700417	-0.0842089	-11.3849	7.42567e-28
rs75985253	cg03700417	-0.0820757	-11.3756	8.12767e-28
rs146699380	cg03700417	-0.0820235	-11.3729	8.34844e-28
rs75284026	cg03700417	-0.0804646	-11.3549	9.96082e-28
rs12364278	cg03700417	-0.0644494	-11.3365	1.19314e-27
rs1948169	cg03700417	-0.0640109	-11.3257	1.32591e-27
rs11038468	cg03700417	-0.0503871	-11.2776	2.11968e-27
rs1387055	cg03700417	-0.0718344	-11.2506	2.75669e-27
rs896342	cg03700417	-0.050364	-11.2139	3.93984e-27
rs901904	cg03700417	-0.0502986	-11.2051	4.29187e-27
rs56024005	cg03700417	-0.0503767	-11.2039	4.34032e-27
rs75788366	cg03700417	-0.0817855	-11.1868	5.12423e-27
rs77602209	cg03700417	-0.0780262	-11.1802	5.46439e-27
rs74401916	cg03700417	-0.0774679	-11.0887	1.32257e-26
rs116618965	cg03700417	-0.0774679	-11.0887	1.32257e-26
rs58129596	cg03700417	-0.0774679	-11.0887	1.32257e-26
rs485639	cg10840851	0.0308597	11.0803	1.43337e-26
rs6591853	cg07675998	-0.0347429	-11.0095	2.8298e-26
rs4930406	cg07675998	-0.0278059	-10.9847	3.59043e-26
rs76462073	cg03700417	-0.0775789	-10.9833	3.63864e-26
rs75235781	cg03700417	-0.0736027	-10.9676	4.22714e-26
rs76300496	cg03700417	-0.0594456	-10.9192	6.70896e-26
rs80006971	cg03700417	-0.07703	-10.8665	1.1076e-25
rs78357853	cg03700417	-0.0578383	-10.8387	1.44199e-25
rs77066242	cg03700417	-0.0578383	-10.8387	1.44199e-25
rs78953947	cg03700417	-0.0578383	-10.8387	1.44199e-25
rs76622493	cg03700417	-0.0577881	-10.8299	1.56715e-25
rs750994	cg03700417	-0.0635437	-10.826	1.62603e-25
rs74775627	cg03700417	-0.072566	-10.7388	3.70245e-25
rs114311786	cg03700417	-0.0710629	-10.6794	6.47003e-25
rs60705077	cg03700417	-0.0712565	-10.419	7.27716e-24
rs114904055	cg03700417	-0.0755183	-10.4013	8.567e-24
rs16938298	cg03700417	-0.0844553	-10.3926	9.2816e-24
rs12274286	cg03700417	-0.0735192	-10.3845	9.99908e-24
rs114173381	cg03700417	-0.0754817	-10.35	1.37137e-23
rs875021	cg03700417	-0.0491134	-10.2818	2.55954e-23
rs76496389	cg03700417	-0.0728786	-10.2005	5.3589e-23
rs2122839	cg03700417	-0.0877109	-10.1797	6.47463e-23
rs77681058	cg03700417	-0.0685733	-10.1699	7.06905e-23
rs6485630m	cg03700417	-0.0727767	-10.1684	7.16603e-23
rs7932477	cg03700417	-0.0701686	-10.1499	8.47437e-23
rs12275307	cg03700417	-0.0701686	-10.1499	8.47437e-23
rs113779189	cg03700417	-0.0701686	-10.1499	8.47437e-23
rs2863702	cg03700417	-0.0567829	-10.1451	8.85041e-23
rs6485624	cg03700417	-0.0570451	-10.1427	9.04236e-23
rs77048284	cg07675998	-0.042424	-10.1023	1.30145e-22
rs4930191	cg07675998	0.0258817	10.0858	1.50955e-22
rs7925329	cg03700417	0.0466875	10.0708	1.72783e-22
rs61885698	cg07675998	-0.0248623	-10.0361	2.35907e-22
rs10751011	cg07675998	-0.0248232	-10.0181	2.77081e-22
rs75589465	cg03700417	-0.0787882	-10.0095	2.99192e-22
rs9787760	cg03700417	-0.0452549	-10.0029	3.17433e-22
rs10736732	cg07675998	-0.0248237	-10.0029	3.17497e-22
rs12276079	cg03700417	-0.0712473	-9.99588	3.37962e-22
rs74322017	cg03700417	-0.0710901	-9.94132	5.49571e-22
rs75913978	cg03700417	-0.0671785	-9.88579	8.99616e-22
rs74813191	cg07675998	-0.0409782	-9.88498	9.06111e-22
rs76306684	cg07675998	-0.0409782	-9.88498	9.06111e-22
rs139767668	cg07675998	-0.0409782	-9.88498	9.06111e-22
rs2615923	cg19566482	-0.0352694	-9.86894	1.04434e-21
rs2615921	cg19566482	-0.0352664	-9.84173	1.32809e-21
rs10219310	cg03700417	-0.0703804	-9.80384	1.85471e-21
rs4938561	cg20022139	0.0492457	9.79294	2.04132e-21
rs10736733	cg07675998	0.0242822	9.77863	2.31492e-21
rs74329445	cg03700417	-0.0701904	-9.7601	2.72389e-21
rs74360883	cg03700417	-0.0702153	-9.74606	3.08045e-21
rs6591856	cg07675998	-0.0242013	-9.72934	3.5663e-21
rs61653272	cg03700417	-0.0692223	-9.72084	3.84153e-21
rs4938992	cg10840851	0.0285498	9.68966	5.04372e-21
rs113846823	cg03700417	-0.0754562	-9.66377	6.32034e-21
rs7114666	cg03700417	-0.0879341	-9.6272	8.68539e-21
rs10742757	cg03700417	-0.0633675	-9.58492	1.25287e-20
rs74651561	cg03700417	-0.0717576	-9.55896	1.56794e-20
rs115938332	cg03700417	-0.0717576	-9.55896	1.56794e-20
rs74827412	cg03700417	-0.0674582	-9.5227	2.14318e-20
rs59184195	cg03700417	-0.0707279	-9.51948	2.20343e-20
rs80123493	cg03700417	-0.0707279	-9.51948	2.20343e-20
rs56807367	cg03700417	-0.0649385	-9.50996	2.39151e-20
rs11231799	cg07675998	-0.0320959	-9.50406	2.51595e-20
rs57499770	cg03700417	-0.0710165	-9.49707	2.67167e-20
rs78370737	cg03700417	-0.0710165	-9.49707	2.67167e-20
rs77632470	cg03700417	-0.0710165	-9.49707	2.67167e-20
rs78570154	cg03700417	-0.0710165	-9.49707	2.67167e-20
rs74587277	cg03700417	-0.0710232	-9.49434	2.735e-20
rs75203660	cg03700417	-0.0647117	-9.45986	3.67623e-20
rs77871313	cg03700417	-0.0705466	-9.41658	5.32209e-20
rs4755986	cg03700417	-0.052248	-9.33656	1.05119e-19
rs11820896	cg03700417	-0.0525835	-9.331	1.10191e-19
rs11231803	cg07675998	0.0251364	9.29881	1.44694e-19
rs4930189	cg07675998	0.0252374	9.29381	1.50931e-19
rs4938565	cg20022139	0.0444266	9.22041	2.80058e-19
rs7946961	cg20022139	0.0444266	9.22041	2.80058e-19
rs4938568	cg20022139	0.0444266	9.22041	2.80058e-19
rs4938569	cg20022139	0.0444266	9.22041	2.80058e-19
rs111723516	cg20022139	0.0444266	9.22041	2.80058e-19
rs4938570	cg20022139	0.0444266	9.22041	2.80058e-19
rs11217059	cg20022139	0.0444266	9.22041	2.80058e-19
rs7103314	cg20022139	0.0444266	9.22041	2.80058e-19
rs7111035	cg03700417	-0.0853685	-9.18633	3.72655e-19
rs4755323	cg03700417	0.0475337	9.17721	4.02235e-19
rs10892298	cg20022139	0.0443924	9.17716	4.02396e-19
rs7119460	cg20022139	0.0442512	9.17704	4.02799e-19
rs2156750	cg20022139	0.0442148	9.14042	5.46899e-19
rs2156749	cg20022139	0.0442148	9.14042	5.46899e-19
rs4938564	cg20022139	0.0442148	9.14042	5.46899e-19
rs2156752	cg20022139	0.0442151	9.12683	6.12508e-19
rs7116715	cg20022139	0.0439969	9.08754	8.49129e-19
rs896343	cg03700417	-0.0612707	-9.05961	1.07045e-18
rs73490242	cg07675998	-0.0321976	-9.01136	1.5948e-18
rs7482165	cg07675998	-0.0319479	-8.93889	2.89365e-18
rs4930400	cg07675998	-0.0320651	-8.92499	3.24235e-18
rs76407941	cg03700417	-0.0449762	-8.92395	3.27021e-18
rs604237	cg07675998	0.0235271	8.89348	4.19483e-18
rs7947921	cg03700417	-0.0711104	-8.86993	5.08267e-18
rs6485630	cg03700417	0.0428391	8.8563	5.67913e-18
rs12295982	cg20031708	-0.037942	-8.78304	1.0286e-17
rs4755994	cg03700417	-0.0568167	-8.73387	1.52899e-17
rs7949832	cg03700417	-0.0567541	-8.71992	1.71045e-17
rs7933007	cg20022139	0.0388627	8.71423	1.79044e-17
rs12280668	cg20031708	-0.0367247	-8.70184	1.97774e-17
rs4442522	cg03700417	-0.0566507	-8.70023	2.00339e-17
rs12280904	cg20031708	-0.0366622	-8.68268	2.30596e-17
rs7110477	cg03700417	-0.0849672	-8.67891	2.37661e-17
rs7111829	cg03700417	-0.0852442	-8.66646	2.62552e-17
rs116402057	cg03700417	-0.0852442	-8.66646	2.62552e-17
rs78041060	cg03700417	-0.0851701	-8.65896	2.78787e-17
rs116721607	cg03700417	-0.0851701	-8.65896	2.78787e-17
rs12273102	cg20031708	-0.0365457	-8.64984	2.9983e-17
rs73586872	cg20031708	-0.0365457	-8.64984	2.9983e-17
rs12284388	cg20031708	-0.0364993	-8.63844	3.28395e-17
rs12284500	cg20031708	-0.0364993	-8.63844	3.28395e-17
rs2074417	cg10840851	0.0269005	8.60823	4.17732e-17
rs4755980	cg03700417	0.0435418	8.60589	4.25579e-17
rs12279985	cg20031708	-0.0363409	-8.59252	4.73248e-17
rs78849749	cg03700417	-0.0822897	-8.58107	5.18296e-17
rs12282017	cg20031708	-0.0355345	-8.57393	5.48499e-17
rs79497302	cg07675998	-0.0344751	-8.57	5.65833e-17
rs73586806	cg20031708	-0.037158	-8.5617	6.04291e-17
rs77174966	cg07675998	-0.0383285	-8.56169	6.04334e-17
rs896335	cg03700417	-0.0696291	-8.5604	6.10549e-17
rs3794040	cg10840851	0.0267621	8.55949	6.14971e-17
rs12278942	cg03700417	0.0414431	8.54336	6.98643e-17
rs11216563	cg20031708	-0.0373423	-8.53823	7.27577e-17
rs116054076	cg03700417	-0.0796066	-8.52263	8.2292e-17
rs115068208	cg03700417	-0.0796066	-8.52263	8.2292e-17
rs4143441	cg03700417	0.0409042	8.5033	9.58384e-17
rs12286624	cg20031708	-0.0354676	-8.50289	9.61445e-17
rs896344	cg03700417	0.0411733	8.48849	1.07683e-16
rs500589	cg07675998	0.0225289	8.48045	1.14706e-16
rs12294333	cg07675998	0.0229081	8.45604	1.38932e-16
rs60887160	cg20031708	-0.0356893	-8.44951	1.46231e-16
rs12284607	cg20031708	-0.0373022	-8.41103	1.97578e-16
rs7939462	cg07675998	-0.0208741	-8.38881	2.3496e-16
rs10792438	cg07675998	-0.0207472	-8.34387	3.332e-16
rs4755998	cg03700417	0.0392773	8.2604	6.34899e-16
rs11038470	cg03700417	-0.0637586	-8.21142	9.24644e-16
rs7115683	cg03700417	0.0364821	8.19822	1.02295e-15
rs4938566	cg20022139	0.0387274	8.19713	1.03148e-15
rs4938567	cg20022139	0.0387274	8.19713	1.03148e-15
rs80145730	cg07675998	-0.0356982	-8.1884	1.10262e-15
rs1210879	cg07675998	0.0222254	8.18685	1.11578e-15
rs7130795	cg16013680	-0.0303506	-8.17643	1.2082e-15
rs11601762	cg07675998	0.0215171	8.17017	1.26727e-15
rs74485429	cg07675998	0.0289256	8.14929	1.48567e-15
rs11823330	cg12829473	-0.0308824	-8.14108	1.58144e-15
rs78415538	cg03700417	-0.0634606	-8.1373	1.62751e-15
rs74050108	cg06723541	0.0252607	8.13106	1.70653e-15
rs61885701	cg07675998	0.0213471	8.12533	1.78247e-15
rs2156753	cg20022139	0.0384726	8.11575	1.91681e-15
rs2156751	cg20022139	0.0384726	8.11575	1.91681e-15
rs2187491	cg20022139	0.0384726	8.11575	1.91681e-15
rs4936440	cg20022139	0.0384726	8.11575	1.91681e-15
rs2046734	cg03700417	-0.0383815	-8.11125	1.98347e-15
rs114822408	cg07675998	-0.0354069	-8.09524	2.23913e-15
rs10466693	cg07675998	0.0210751	8.03681	3.47996e-15
rs4755322	cg03700417	0.0409774	8.02955	3.67525e-15
rs2082947	cg07675998	0.021	8.02138	3.9078e-15
rs2082946	cg07675998	0.021	8.02138	3.9078e-15
rs2099531	cg07675998	0.021	8.02138	3.9078e-15
rs4930402	cg07675998	0.0209656	8.01386	4.13481e-15
rs7936748	cg06723541	0.024844	8.00748	4.33759e-15
rs11607325	cg07675998	0.0209403	7.96227	6.08433e-15
rs113709091	cg07675998	0.0278916	7.90487	9.32815e-15
rs72861430	cg12829473	-0.0332205	-7.89312	1.01778e-14
rs896337	cg03700417	-0.0503611	-7.89102	1.0337e-14
rs589852	cg07675998	-0.02071	-7.86484	1.25478e-14
rs10838481	cg03700417	0.0397897	7.85689	1.33072e-14
rs192690595	cg03700417	-0.0638296	-7.85123	1.38747e-14
rs1941410	cg10475276	0.013919	7.84371	1.46667e-14
rs77073170	cg03700417	-0.0637415	-7.8386	1.52297e-14
rs113922848	cg07675998	0.0281182	7.81244	1.84636e-14
rs75696693	cg03700417	-0.0636827	-7.80797	1.90801e-14
rs78856578	cg03700417	-0.0636827	-7.80797	1.90801e-14
rs76154290	cg03700417	-0.0636234	-7.80088	2.00997e-14
rs77781600	cg10475276	0.0245944	7.79915	2.03574e-14
rs11041153	cg20299572	0.0267425	7.79848	2.04571e-14
rs76552492	cg10475276	0.0245906	7.79685	2.0704e-14
rs7930399	cg03700417	0.0394295	7.73487	3.25802e-14
rs77300322	cg03700417	-0.062865	-7.67932	4.87905e-14
rs77481661	cg03700417	-0.062865	-7.67932	4.87905e-14
rs115125991	cg03700417	-0.0626172	-7.66613	5.36826e-14
rs10742752	cg03700417	-0.0417409	-7.64623	6.19881e-14
rs192133	cg07675998	0.0201799	7.62528	7.21018e-14
rs171284	cg07675998	0.0201799	7.62528	7.21018e-14
rs73408832	cg08238129	-0.0625979	-21.0038	1.00368e-77
rs55939945	cg08238129	-0.061483	-20.4708	1.21475e-74
rs55646110	cg08238129	-0.0614309	-20.4307	2.06602e-74
rs60739634	cg08238129	-0.0655467	-19.4678	6.61982e-69
rs73408818	cg08238129	-0.0556579	-18.7319	9.30517e-65
rs73408820	cg08238129	-0.0655783	-18.6389	3.07988e-64
rs73408812	cg08238129	-0.0554125	-18.5375	1.13454e-63
rs112481331	cg08238129	-0.0554125	-18.5375	1.13454e-63
rs7971535	cg08238129	-0.0553764	-18.4997	1.84246e-63
rs7135117	cg25283432	-0.0216387	-18.3778	8.77906e-63
rs73408803	cg08238129	-0.0528241	-17.8846	4.68014e-60
rs113369220	cg08238129	-0.0537427	-17.6277	1.19921e-58
rs59526938	cg08238129	-0.0537529	-17.6247	1.24454e-58
rs55951195	cg08238129	-0.0539463	-17.5914	1.89298e-58
rs112385625	cg08238129	-0.0539075	-17.5741	2.35041e-58
rs113974324	cg08238129	-0.053547	-17.5482	3.25636e-58
rs73408892	cg08238129	-0.0535284	-17.5348	3.8554e-58
rs61677786	cg08238129	-0.0542368	-17.5233	4.45117e-58
rs113539595	cg08238129	-0.0536452	-17.5208	4.59475e-58
rs113201309	cg08238129	-0.0537294	-17.4876	6.9697e-58
rs112827603	cg08238129	-0.0534653	-17.4478	1.14811e-57
rs12311043	cg08238129	-0.0524267	-17.445	1.18932e-57
rs57719471	cg08238129	-0.0643437	-17.4359	1.33194e-57
rs73411017	cg08238129	-0.0641782	-17.4251	1.52507e-57
rs57258703	cg08238129	-0.0638221	-17.416	1.7089e-57
rs73408835	cg08238129	-0.0533015	-17.4091	1.86242e-57
rs55813219	cg08238129	-0.0538553	-17.405	1.9605e-57
rs73408899	cg08238129	-0.0537671	-17.4049	1.96372e-57
rs34010146	cg08238129	-0.0537671	-17.4049	1.96372e-57
rs74815519	cg08238129	-0.0537671	-17.4049	1.96372e-57
rs76614874	cg08238129	-0.0537671	-17.4049	1.96372e-57
rs12828755	cg08238129	-0.0537671	-17.4049	1.96372e-57
rs73411006	cg08238129	-0.0537671	-17.4049	1.96372e-57
rs73411009	cg08238129	-0.0537671	-17.4049	1.96372e-57
rs61061591	cg08238129	-0.0537671	-17.4049	1.96372e-57
rs73411015	cg08238129	-0.0537671	-17.4049	1.96372e-57
rs73408894	cg08238129	-0.0534387	-17.4006	2.07357e-57
rs59881907	cg08238129	-0.0638137	-17.3952	2.21788e-57
rs60920158	cg08238129	-0.0641114	-17.3919	2.31093e-57
rs73408838	cg08238129	-0.0641114	-17.3919	2.31093e-57
rs73411018m	cg08238129	-0.0537288	-17.3878	2.43397e-57
rs58462666	cg08238129	-0.0537288	-17.3878	2.43397e-57
rs60888713	cg08238129	-0.0537288	-17.3878	2.43397e-57
rs199843346	cg08238129	-0.0534745	-17.3657	3.20563e-57
rs59081274	cg08238129	-0.0531902	-17.3497	3.91898e-57
rs73408893	cg08238129	-0.0531902	-17.3497	3.91898e-57
rs73408890	cg08238129	-0.0533441	-17.3477	4.01894e-57
rs73411027	cg08238129	-0.0535891	-17.344	4.2047e-57
rs11060997	cg08238129	-0.0522976	-17.3339	4.77507e-57
rs73408810	cg08238129	-0.0518168	-17.3194	5.72084e-57
rs78262947	cg08238129	-0.0532945	-17.319	5.74871e-57
rs112055728	cg08238129	-0.0532945	-17.319	5.74871e-57
rs56288804	cg08238129	-0.053445	-17.2856	8.72903e-57
rs59002329	cg08238129	-0.0523851	-17.2735	1.01432e-56
rs73408862	cg08238129	-0.0523851	-17.2735	1.01432e-56
rs73408863	cg08238129	-0.0523851	-17.2735	1.01432e-56
rs75980290	cg08238129	-0.0535504	-17.2696	1.06591e-56
rs57310784	cg08238129	-0.0522459	-17.2694	1.06783e-56
rs61546241	cg08238129	-0.0531181	-17.2541	1.29239e-56
rs73411093	cg08238129	-0.0531994	-17.2213	1.9456e-56
rs73408846	cg08238129	-0.0645026	-17.2188	2.00605e-56
rs73411033	cg08238129	-0.0535283	-17.2151	2.10207e-56
rs77113709	cg08238129	-0.0535283	-17.2151	2.10207e-56
rs61592192	cg08238129	-0.0535283	-17.2151	2.10207e-56
rs60987910	cg08238129	-0.0533976	-17.1971	2.62942e-56
rs57863319	cg08238129	-0.0533976	-17.1971	2.62942e-56
rs73411041	cg08238129	-0.0533976	-17.1971	2.62942e-56
rs73411043	cg08238129	-0.0533976	-17.1971	2.62942e-56
rs59211448	cg08238129	-0.0533976	-17.1971	2.62942e-56
rs11060999	cg08238129	-0.0521866	-17.1938	2.74073e-56
rs12229884	cg08238129	-0.0521866	-17.1938	2.74073e-56
rs73408887	cg08238129	-0.0637203	-17.1914	2.8229e-56
rs59379557	cg08238129	-0.0534008	-17.1894	2.89615e-56
rs752164	cg08238129	-0.0532507	-17.1822	3.16638e-56
rs75389867	cg08238129	-0.0528978	-17.1682	3.76822e-56
rs114174371	cg08238129	-0.0528978	-17.1682	3.76822e-56
rs113985700	cg08238129	-0.0535654	-17.1637	3.98306e-56
rs56000615	cg08238129	-0.0636666	-17.1604	4.15253e-56
rs60341983	cg08238129	-0.053066	-17.1254	6.41791e-56
rs73411057	cg08238129	-0.053251	-17.105	8.27191e-56
rs57641050	cg08238129	-0.053251	-17.105	8.27191e-56
rs11061578	cg08238129	-0.053251	-17.105	8.27191e-56
rs61377358	cg08238129	-0.0531201	-17.0869	1.0355e-55
rs61516893	cg08238129	-0.0531201	-17.0869	1.0355e-55
rs56020503	cg08238129	-0.0531201	-17.0869	1.0355e-55
rs56725866	cg08238129	-0.0531201	-17.0869	1.0355e-55
rs55796417	cg08238129	-0.0531201	-17.0869	1.0355e-55
rs55830208	cg08238129	-0.0531201	-17.0869	1.0355e-55
rs112036090	cg08238129	-0.0531201	-17.0869	1.0355e-55
rs73411058	cg08238129	-0.0531201	-17.0869	1.0355e-55
rs60809882	cg08238129	-0.0531201	-17.0869	1.0355e-55
rs73411063	cg08238129	-0.0531201	-17.0869	1.0355e-55
rs60341839	cg08238129	-0.0531201	-17.0869	1.0355e-55
rs57106451	cg08238129	-0.0531201	-17.0869	1.0355e-55
rs57794792	cg08238129	-0.0531201	-17.0869	1.0355e-55
rs73411076	cg08238129	-0.0531201	-17.0869	1.0355e-55
rs57764857	cg08238129	-0.0531201	-17.0869	1.0355e-55
rs60358140	cg08238129	-0.0531201	-17.0869	1.0355e-55
rs7952760	cg08238129	-0.0531201	-17.0869	1.0355e-55
rs11060932	cg08238129	-0.0520138	-17.0855	1.05318e-55
rs10219462	cg08238129	-0.0520138	-17.0855	1.05318e-55
rs7302112	cg08238129	-0.0633763	-17.0736	1.22169e-55
rs73411090	cg08238129	-0.0531457	-17.0554	1.53021e-55
rs55992397	cg08238129	-0.0531457	-17.0554	1.53021e-55
rs60546720	cg08238129	-0.0531457	-17.0554	1.53021e-55
rs7964036	cg08238129	-0.0531457	-17.0554	1.53021e-55
rs56140750	cg08238129	-0.0530142	-17.037	1.9222e-55
rs73411087	cg08238129	-0.0530142	-17.037	1.9222e-55
rs73408859	cg08238129	-0.051601	-16.9676	4.54551e-55
rs73413230	cg08238129	-0.0526459	-16.9035	1.00422e-54
rs57178349	cg08238129	-0.0527083	-16.8971	1.08698e-54
rs73413226	cg08238129	-0.0525803	-16.8798	1.34611e-54
rs73413228	cg08238129	-0.0525803	-16.8798	1.34611e-54
rs111987234	cg08238129	-0.0525803	-16.8798	1.34611e-54
rs73413241	cg08238129	-0.0525803	-16.8798	1.34611e-54
rs73413246	cg08238129	-0.0525803	-16.8798	1.34611e-54
rs60761837	cg08238129	-0.0526475	-16.8612	1.69254e-54
rs73411011	cg08238129	-0.0535012	-16.8384	2.24202e-54
rs151036257	cg08238129	-0.05292	-16.8051	3.38052e-54
rs73413265	cg08238129	-0.0527744	-16.7846	4.35515e-54
rs73406997	cg08238129	-0.0590802	-16.7812	4.53858e-54
rs58025094	cg08238129	-0.0530533	-16.6897	1.39942e-53
rs12229712	cg08238129	-0.0520724	-16.2921	1.80292e-51
rs11060703	cg08238129	-0.0465549	-15.9272	1.48133e-49
rs60901287	cg08238129	-0.0579551	-15.8536	3.58107e-49
rs111835289	cg08238129	-0.0475276	-15.8446	3.99128e-49
rs59615440	cg08238129	-0.0533234	-15.4935	2.61821e-47
rs73411084	cg08238129	-0.0533234	-15.4935	2.61821e-47
rs73411088	cg08238129	-0.0533234	-15.4935	2.61821e-47
rs73411098	cg08238129	-0.0533234	-15.4935	2.61821e-47
rs56150478	cg08238129	-0.0532008	-15.4735	3.31826e-47
rs73411014	cg08238129	-0.0532277	-15.4578	3.99631e-47
rs59187995	cg08238129	-0.0440828	-15.4294	5.59544e-47
rs7968045	cg08238129	-0.0485012	-15.3891	9.00363e-47
rs57110420	cg08238129	-0.0541084	-15.3514	1.40547e-46
rs73406966	cg08238129	-0.0571313	-15.3323	1.75906e-46
rs73413236	cg08238129	-0.0527647	-15.3219	1.98892e-46
rs73413263	cg08238129	-0.0527647	-15.3219	1.98892e-46
rs7295258	cg08238129	-0.054082	-15.3214	2.00069e-46
rs56910713	cg08238129	-0.0523803	-15.2659	3.84523e-46
rs112529657	cg08238129	-0.0503647	-15.2536	4.44248e-46
rs73413270	cg08238129	-0.0471833	-15.2272	6.05825e-46
rs58490757	cg08238129	-0.0460385	-15.2253	6.1931e-46
rs60094911	cg18728406	0.036624	15.1396	1.69243e-45
rs74087113	cg18728406	0.0365754	15.1086	2.43321e-45
rs1317131	cg18728406	0.0365754	15.1086	2.43321e-45
rs1993398	cg18728406	0.0365754	15.1086	2.43321e-45
rs74952881	cg18728406	0.0365754	15.1086	2.43321e-45
rs74903123	cg18728406	0.0365754	15.1086	2.43321e-45
rs7973498	cg18728406	0.0365754	15.1086	2.43321e-45
rs60126713	cg18728406	0.0365754	15.1086	2.43321e-45
rs7964320	cg18728406	0.0365754	15.1086	2.43321e-45
rs138359681	cg18728406	0.0365754	15.1086	2.43321e-45
rs56945609	cg18728406	0.0365754	15.1086	2.43321e-45
rs58756176	cg18728406	0.0365754	15.1086	2.43321e-45
rs56737983	cg18728406	0.0365754	15.1086	2.43321e-45
rs78616783	cg18728406	0.0365754	15.1086	2.43321e-45
rs77056500	cg18728406	0.0365754	15.1086	2.43321e-45
rs11836837	cg18728406	0.0365754	15.1086	2.43321e-45
rs11837639	cg18728406	0.0365754	15.1086	2.43321e-45
rs57291131	cg18728406	0.0365754	15.1086	2.43321e-45
rs7970674	cg18728406	0.0365754	15.1086	2.43321e-45
rs59995499	cg08238129	-0.045709	-15.1054	2.52532e-45
rs60894374	cg08238129	-0.0457368	-15.1019	2.6294e-45
rs10506288	cg18728406	0.0367727	15.0469	4.99814e-45
rs60424338	cg08238129	-0.0457588	-15.0421	5.2903e-45
rs58282663	cg08238129	-0.0457588	-15.0421	5.2903e-45
rs60200203	cg08238129	-0.0457588	-15.0421	5.2903e-45
rs55820451	cg08238129	-0.0457588	-15.0421	5.2903e-45
rs60320128	cg08238129	-0.0457588	-15.0421	5.2903e-45
rs61110645	cg08238129	-0.0457588	-15.0421	5.2903e-45
rs61089898	cg08238129	-0.0457588	-15.0421	5.2903e-45
rs56846082	cg08238129	-0.0459583	-15.015	7.25485e-45
rs74087134	cg18728406	0.0365189	14.9419	1.69892e-44
rs10506287	cg18728406	0.0365189	14.9419	1.69892e-44
rs80071141	cg18728406	0.0365189	14.9419	1.69892e-44
rs4427600	cg08238129	-0.0454219	-14.9213	2.15727e-44
rs61396549	cg08238129	-0.0454219	-14.9213	2.15727e-44
rs60167440	cg08238129	-0.0454219	-14.9213	2.15727e-44
rs73413223	cg08238129	-0.0454219	-14.9213	2.15727e-44
rs60235187	cg08238129	-0.0454219	-14.9213	2.15727e-44
rs7967118m	cg08238129	-0.0454314	-14.9208	2.17108e-44
rs113265502	cg08238129	-0.0505414	-14.7376	1.80932e-43
rs73417317	cg08238129	-0.0505414	-14.7376	1.80932e-43
rs113196368	cg08238129	-0.0513498	-14.6267	6.48752e-43
rs73408822	cg08238129	-0.0410074	-14.5401	1.7528e-42
rs73417324	cg08238129	-0.0510998	-14.5398	1.75814e-42
rs111627086	cg08238129	-0.0510998	-14.5398	1.75814e-42
rs78688710	cg08238129	-0.0511213	-14.5153	2.32598e-42
rs73417346	cg08238129	-0.0508498	-14.409	7.83211e-42
rs57805529	cg08238129	-0.0407842	-14.3997	8.71233e-42
rs61275253	cg08238129	-0.040403	-14.3229	2.08446e-41
rs7306981	cg08238129	-0.0404166	-14.3205	2.1442e-41
rs73408816	cg08238129	-0.0404166	-14.3205	2.1442e-41
rs5892	cg25283432	-0.0294263	-14.32	2.15572e-41
rs58702154	cg08238129	-0.050701	-14.3034	2.60356e-41
rs73417348	cg08238129	-0.049358	-14.2707	3.76955e-41
rs838907	cg25283432	-0.0164434	-14.1098	2.32027e-40
rs56392140	cg08238129	-0.0400819	-14.0291	5.75122e-40
rs7299155	cg08238129	-0.0474644	-13.9975	8.19404e-40
rs73417342	cg08238129	-0.0474644	-13.9975	8.19404e-40
rs59708426	cg08238129	-0.0474644	-13.9975	8.19404e-40
rs57916875	cg18728406	0.0343274	13.9185	1.98351e-39
rs52824916	cg18728406	0.0343274	13.9185	1.98351e-39
rs113903668	cg18728406	0.0342593	13.88	3.04571e-39
rs111915210	cg08238129	-0.047122	-13.8698	3.41504e-39
rs60121503	cg18728406	0.0341279	13.8662	3.55319e-39
rs113605702	cg18728406	0.0341279	13.8662	3.55319e-39
rs838906	cg25283432	-0.0161394	-13.8623	3.70961e-39
rs57191490	cg18728406	0.0340308	13.82	5.94452e-39
rs2303305	cg18728406	0.0348011	13.8199	5.9507e-39
rs60415769	cg18728406	0.0363606	13.7951	7.83939e-39
rs74089182	cg18728406	0.0340019	13.7937	7.96357e-39
rs58339539	cg08238129	-0.0465318	-13.7429	1.39838e-38
rs73417343	cg08238129	-0.0472505	-13.7075	2.07087e-38
rs112536786	cg18728406	0.033657	13.6909	2.48752e-38
rs113680356	cg18728406	0.0339687	13.6897	2.52194e-38
rs75222486	cg18728406	0.0339687	13.6897	2.52194e-38
rs75278574	cg18728406	0.0361573	13.6683	3.19438e-38
rs58278271	cg18728406	0.0338704	13.6048	6.43826e-38
rs60613973	cg18728406	0.0357971	13.5501	1.17509e-37
rs61281663	cg18728406	0.0357288	13.5445	1.24911e-37
rs74086911	cg18728406	0.0359629	13.5423	1.27961e-37
rs838905	cg25283432	-0.0159547	-13.5394	1.32202e-37
rs4641552	cg18728406	0.0357663	13.5368	1.35946e-37
rs73372183	cg15112006	-0.0441116	-13.4966	2.11424e-37
rs838908	cg25283432	-0.0157834	-13.4664	2.94381e-37
rs55637397	cg18728406	0.0358194	13.4488	3.5696e-37
rs12366787	cg08238129	-0.0437146	-13.4184	4.97848e-37
rs17123764	cg18728406	0.0362305	13.403	5.88714e-37
rs56743994	cg18728406	0.0362305	13.403	5.88714e-37
rs74089570	cg18728406	0.0362305	13.403	5.88714e-37
rs74089564m	cg18728406	0.036218	13.3796	7.60067e-37
rs844427	cg25283432	-0.0197581	-13.3337	1.25285e-36
rs59261129	cg18728406	0.0360877	13.3098	1.62558e-36
rs74089573	cg18728406	0.0360877	13.3098	1.62558e-36
rs55686423	cg18728406	0.0336895	13.226	4.03652e-36
rs2278070	cg18728406	0.0334075	13.1726	7.19273e-36
rs112288169	cg08238129	-0.054825	-13.1673	7.61383e-36
rs74089566	cg18728406	0.0356941	13.1538	8.81425e-36
rs60174680	cg08238129	-0.0549021	-13.1201	1.26745e-35
rs4759187	cg01297684	0.0537376	13.0915	1.72485e-35
rs73421393	cg08238129	-0.0542937	-13.0393	3.02054e-35
rs73421389	cg08238129	-0.055409	-13.0348	3.17019e-35
rs111774370	cg08238129	-0.0555169	-13.0177	3.80994e-35
rs73421384	cg08238129	-0.054402	-12.9865	5.32306e-35
rs2540499	cg27246571	-0.052565	-12.9836	5.49055e-35
rs2540498	cg27246571	-0.052565	-12.9836	5.49055e-35
rs2293440	cg25283432	-0.0156777	-12.9469	8.13338e-35
rs111378373	cg08238129	-0.0541547	-12.9162	1.12812e-34
rs73408334	cg08238129	-0.0541547	-12.9162	1.12812e-34
rs55950245	cg08238129	-0.0545724	-12.7456	6.91505e-34
rs55874825	cg01297684	0.0523057	12.7355	7.69827e-34
rs55927117	cg01297684	0.0531902	12.7129	9.76825e-34
rs59237820	cg08238129	-0.0527044	-12.6934	1.19994e-33
rs12313602	cg01297684	0.0522094	12.6809	1.36962e-33
rs838905	cg14849578	-0.0326332	-12.6612	1.68613e-33
rs11057818	cg25283432	-0.015049	-12.6558	1.78501e-33
rs838907	cg14849578	-0.032409	-12.5998	3.21536e-33
rs838908	cg14849578	-0.0322528	-12.5805	3.94029e-33
rs74719236	cg15112006	-0.0515063	-12.5252	7.0313e-33
rs838906	cg14849578	-0.0320621	-12.5059	8.5999e-33
rs28370565	cg08238129	-0.0520322	-12.4729	1.21407e-32
rs7957096	cg08238129	-0.0330739	-12.4402	1.70766e-32
rs114109920	cg18728406	0.0358401	12.3728	3.44287e-32
rs1726374	cg25283432	-0.0185611	-12.3697	3.55665e-32
rs74086906	cg18728406	0.0358646	12.312	6.46695e-32
rs113265587	cg08238129	-0.0544638	-12.3001	7.31002e-32
rs838911	cg25283432	-0.0145859	-12.2122	1.80977e-31
rs838895m	cg25283432	-0.0148901	-12.2034	1.98239e-31
rs12302993	cg27246571	-0.0450451	-12.1657	2.92104e-31
rs74089557	cg18728406	0.0346136	12.16	3.09614e-31
rs55928229	cg08238129	-0.0541354	-12.1464	3.56013e-31
rs74089551	cg18728406	0.0344999	12.1181	4.7559e-31
rs139096986	cg18728406	0.0344999	12.1181	4.7559e-31
rs11057818	cg14849578	-0.0313342	-12.1066	5.35281e-31
rs2272310	cg25283432	-0.0253698	-12.0381	1.07661e-30
rs9919713	cg25283432	-0.0143243	-12.0102	1.431e-30
rs838894	cg25283432	-0.014592	-11.9573	2.4505e-30
rs838868	cg25283432	-0.0142397	-11.9521	2.58298e-30
rs838867	cg25283432	-0.0142397	-11.9521	2.58298e-30
rs838865	cg25283432	-0.0142397	-11.9521	2.58298e-30
rs838893	cg25283432	-0.0144988	-11.8902	4.83453e-30
rs701107	cg25283432	-0.0142414	-11.8256	9.28169e-30
rs838911	cg14849578	-0.0306583	-11.8192	9.89158e-30
rs73413694	cg08238129	-0.0521889	-11.7845	1.403e-29
rs838864	cg25283432	-0.0177629	-11.7784	1.49186e-29
rs57733128	cg08238129	-0.050299	-11.7649	1.70767e-29
rs1672879	cg25283432	-0.0139605	-11.6816	3.93388e-29
chr12:50081154	cg18728406	0.0359378	11.6629	4.74233e-29
chr12:50081155	cg18728406	0.0359378	11.6629	4.74233e-29
rs7970524	cg27246571	-0.0491342	-11.6523	5.26809e-29
rs838892	cg25283432	-0.0140723	-11.6477	5.51888e-29
rs838891	cg25283432	-0.0140531	-11.5804	1.07742e-28
rs838907	cg12053291	-0.0289587	-11.5766	1.11901e-28
rs858156	cg25283432	-0.0141072	-11.5651	1.25451e-28
rs858155	cg25283432	-0.0140616	-11.5513	1.43841e-28
rs7137526	cg04873208	0.0294805	11.5445	1.53867e-28
rs6539341	cg04873208	0.0288972	11.5219	1.92493e-28
rs838905	cg12053291	-0.0289213	-11.5202	1.95774e-28
rs1549500	cg04873208	0.029555	11.5061	2.24933e-28
rs10778563	cg04873208	0.029555	11.5061	2.24933e-28
rs2052740	cg04873208	0.0292593	11.4945	2.52344e-28
rs2114319	cg04873208	0.0288324	11.4555	3.70728e-28
rs838908	cg12053291	-0.0285676	-11.4411	4.27108e-28
rs74087188	cg18728406	0.026223	11.4248	5.01484e-28
rs113271680	cg08238129	-0.0436442	-11.4102	5.78858e-28
rs6539340	cg04873208	0.0285363	11.4076	5.93951e-28
rs838906	cg12053291	-0.0282754	-11.3176	1.43409e-27
rs1579384	cg04873208	0.028352	11.2989	1.72158e-27
rs1549501	cg04873208	0.0290293	11.2551	2.63843e-27
rs73413684	cg08238129	-0.0502657	-11.1726	5.87837e-27
rs146943984	cg18728406	0.0341722	11.1515	7.21312e-27
rs57398316	cg18728406	0.034563	11.1079	1.09929e-26
rs7135117	cg12053291	-0.0300023	-11.0239	2.46455e-26
rs57841760	cg18728406	0.0330054	10.8849	9.2944e-26
rs10778561	cg04873208	0.0277329	10.8748	1.02365e-25
rs897717	cg14849578	-0.02954	-10.8585	1.19442e-25
rs74089525	cg18728406	0.0326242	10.8515	1.2762e-25
rs10846735	cg25283432	0.0130746	10.8472	1.33038e-25
rs4765610	cg25283432	0.0130746	10.8472	1.33038e-25
rs5001158	cg04873208	0.0263527	10.8122	1.85304e-25
rs55841764	cg18728406	0.0327681	10.8085	1.91854e-25
rs897717	cg25283432	-0.0136068	-10.7986	2.10634e-25
rs838911	cg12053291	-0.027101	-10.7427	3.56878e-25
rs74088731	cg18728406	0.0324653	10.6709	7.00886e-25
rs150097931	cg18728406	0.0324653	10.6709	7.00886e-25
rs11057818	cg12053291	-0.0269809	-10.6688	7.14752e-25
rs112733123	cg08238129	-0.0300873	-10.5695	1.80647e-24
rs838898	cg25283432	-0.0237603	-10.5546	2.07602e-24
rs141694549	cg18728406	0.0320371	10.4555	5.19886e-24
rs7955781	cg18728406	0.0320371	10.4555	5.19886e-24
rs7955792	cg18728406	0.0320371	10.4555	5.19886e-24
rs74088733	cg18728406	0.0341983	10.4543	5.25813e-24
rs10846735	cg14849578	0.0272595	10.4124	7.73122e-24
rs4765610	cg14849578	0.0272595	10.4124	7.73122e-24
rs6489254	cg08238129	-0.0292255	-10.406	8.20615e-24
rs59799766	cg08238129	-0.0398598	-10.3163	1.86708e-23
rs10846735	cg12053291	0.025866	10.282	2.55449e-23
rs4765610	cg12053291	0.025866	10.282	2.55449e-23
rs74089067	cg18728406	0.030951	10.2082	4.99697e-23
rs7314144	cg04873208	0.0253304	10.182	6.34097e-23
rs111539247	cg08238129	-0.040219	-10.1601	7.72773e-23
rs7980481	cg08238129	-0.040219	-10.1601	7.72773e-23
rs59384609	cg08238129	-0.040219	-10.1601	7.72773e-23
rs60238006	cg08238129	-0.039932	-10.0829	1.54924e-22
rs28667979	cg08238129	-0.039932	-10.0829	1.54924e-22
rs56068069	cg08238129	-0.0396291	-10.0409	2.25977e-22
rs73421388	cg08238129	-0.0387406	-9.99196	3.49989e-22
rs11830222	cg19122402	-0.0316258	-9.95263	4.96986e-22
rs11831659	cg19122402	-0.0316258	-9.95263	4.96986e-22
rs7963692	cg19122402	-0.0316258	-9.95263	4.96986e-22
rs7972796	cg19122402	-0.0316258	-9.95263	4.96986e-22
rs12307162	cg19122402	-0.0316258	-9.95263	4.96986e-22
rs73428145	cg19122402	-0.0316258	-9.95263	4.96986e-22
rs11837210	cg19122402	-0.0316258	-9.95263	4.96986e-22
rs11829746	cg19122402	-0.0316258	-9.95263	4.96986e-22
rs113474528	cg19122402	-0.0316258	-9.95263	4.96986e-22
rs12306935	cg19122402	-0.0316258	-9.95263	4.96986e-22
rs2710306	cg02369308	-0.0275507	-9.94667	5.24022e-22
rs12320499	cg19122402	-0.0314347	-9.91813	6.75317e-22
rs11065896	cg19122402	-0.0314347	-9.91813	6.75317e-22
rs7299305	cg19122402	-0.0313717	-9.90966	7.28042e-22
rs73410508	cg19122402	-0.0313561	-9.90315	7.71344e-22
rs60612310	cg19122402	-0.0313561	-9.90315	7.71344e-22
rs7964509	cg19122402	-0.0313561	-9.90315	7.71344e-22
rs28615162	cg19122402	-0.0313561	-9.90315	7.71344e-22
rs7305955	cg19122402	-0.0313561	-9.90315	7.71344e-22
rs11065902	cg19122402	-0.0313561	-9.90315	7.71344e-22
rs12315206	cg19122402	-0.0313561	-9.90315	7.71344e-22
rs73410513	cg19122402	-0.0313561	-9.90315	7.71344e-22
rs11065900	cg19122402	-0.0312872	-9.88727	8.87921e-22
rs57018784	cg19122402	-0.0314688	-9.88376	9.15945e-22
rs4898520	cg18728406	0.0299834	9.88179	9.32058e-22
rs2293440	cg12053291	-0.025789	-9.88169	9.32867e-22
rs12301866	cg19122402	-0.0314025	-9.88059	9.41987e-22
rs11065899	cg19122402	-0.0312323	-9.87226	1.01406e-21
rs12312248	cg19122402	-0.0312323	-9.87226	1.01406e-21
rs1107853	cg19122402	-0.0312398	-9.87122	1.02349e-21
rs73410519	cg19122402	-0.0312398	-9.87122	1.02349e-21
rs14555	cg19122402	-0.0312398	-9.87122	1.02349e-21
rs7311116	cg19122402	-0.0312398	-9.87122	1.02349e-21
rs57429061	cg19122402	-0.0314821	-9.85552	1.17588e-21
rs10773000	cg08238129	-0.0258368	-9.83912	1.35909e-21
rs1727302	cg08238129	-0.0264558	-9.83335	1.43012e-21
rs7295678	cg19122402	-0.031127	-9.82929	1.48216e-21
rs12298548	cg19122402	-0.0311615	-9.82439	1.54768e-21
rs7301140	cg19122402	-0.0311615	-9.82439	1.54768e-21
rs4038311	cg14849578	0.0277916	9.79459	2.0119e-21
rs58982895	cg19122402	-0.0309992	-9.74664	3.06502e-21
rs12319091	cg19122402	-0.0309434	-9.72822	3.60135e-21
rs4038311	cg12053291	0.0264936	9.72415	3.73174e-21
rs7309993	cg19122402	-0.030721	-9.69198	4.94286e-21
rs12301585	cg19122402	-0.030721	-9.69198	4.94286e-21
rs7956220	cg19122402	-0.030721	-9.69198	4.94286e-21
rs56142475	cg19122402	-0.030721	-9.69198	4.94286e-21
rs112022408	cg19122402	-0.030673	-9.67404	5.77942e-21
rs73412464	cg19122402	-0.0306886	-9.6733	5.81715e-21
rs11065944	cg19122402	-0.0306886	-9.6733	5.81715e-21
rs7971276	cg19122402	-0.0306886	-9.6733	5.81715e-21
rs41500449	cg19122402	-0.0306886	-9.6733	5.81715e-21
rs10849955	cg19122402	-0.0306886	-9.6733	5.81715e-21
rs73412478	cg19122402	-0.0306886	-9.6733	5.81715e-21
rs12315171	cg19122402	-0.0306886	-9.6733	5.81715e-21
rs7311293	cg19122402	-0.0306886	-9.6733	5.81715e-21
rs12301021	cg19122402	-0.0306886	-9.6733	5.81715e-21
rs7308857	cg19122402	-0.0306886	-9.6733	5.81715e-21
rs73414453	cg19122402	-0.0306886	-9.6733	5.81715e-21
rs9971826	cg19122402	-0.0306886	-9.6733	5.81715e-21
rs9971887	cg19122402	-0.0306886	-9.6733	5.81715e-21
rs13377932	cg19122402	-0.0306886	-9.6733	5.81715e-21
rs60443842	cg19122402	-0.0306886	-9.6733	5.81715e-21
rs7137348	cg19122402	-0.0306886	-9.6733	5.81715e-21
rs11065954	cg19122402	-0.0306886	-9.6733	5.81715e-21
rs28823331	cg19122402	-0.0306886	-9.6733	5.81715e-21
rs77001757	cg19122402	-0.0306886	-9.6733	5.81715e-21
rs12314647	cg19122402	-0.0306886	-9.6733	5.81715e-21
rs7953144	cg19122402	-0.0306886	-9.6733	5.81715e-21
rs7964354	cg19122402	-0.0306886	-9.6733	5.81715e-21
rs77110671	cg19122402	-0.0306886	-9.6733	5.81715e-21
rs16941578	cg19122402	-0.0306886	-9.6733	5.81715e-21
rs7972340	cg19122402	-0.0306886	-9.6733	5.81715e-21
rs113485398	cg19122402	-0.0306886	-9.6733	5.81715e-21
rs146415388	cg19122402	-0.0306886	-9.6733	5.81715e-21
rs7298107	cg19122402	-0.0306886	-9.6733	5.81715e-21
rs11065956	cg19122402	-0.0306886	-9.6733	5.81715e-21
rs11065957	cg19122402	-0.0306886	-9.6733	5.81715e-21
rs11065958	cg19122402	-0.0306886	-9.6733	5.81715e-21
rs6490216	cg19122402	-0.0306886	-9.6733	5.81715e-21
rs12300359	cg19122402	-0.0306842	-9.67005	5.98419e-21
rs11609859	cg14849578	0.0277195	9.66428	6.292e-21
rs11608501	cg14849578	0.0277195	9.66428	6.292e-21
rs11834632	cg19122402	-0.030669	-9.66122	6.46203e-21
rs11065936	cg19122402	-0.0306565	-9.66066	6.49357e-21
rs7301374	cg19122402	-0.0306565	-9.66066	6.49357e-21
rs7305546	cg19122402	-0.0306565	-9.66066	6.49357e-21
rs9804704	cg19122402	-0.0306565	-9.66066	6.49357e-21
rs7302805	cg19122402	-0.0305862	-9.65565	6.78297e-21
rs11065908	cg19122402	-0.0305862	-9.65565	6.78297e-21
rs11065909	cg19122402	-0.0305862	-9.65565	6.78297e-21
rs11065910	cg19122402	-0.0305862	-9.65565	6.78297e-21
rs6490140	cg19122402	-0.0305862	-9.65565	6.78297e-21
rs76709544	cg19122402	-0.0305862	-9.65565	6.78297e-21
rs12310522	cg19122402	-0.0305862	-9.65565	6.78297e-21
rs11065912	cg19122402	-0.0305862	-9.65565	6.78297e-21
rs12299425	cg19122402	-0.0305862	-9.65565	6.78297e-21
rs7961399	cg19122402	-0.0305862	-9.65565	6.78297e-21
rs11065915	cg19122402	-0.0305862	-9.65565	6.78297e-21
rs12299245	cg19122402	-0.0305862	-9.65565	6.78297e-21
rs12300764	cg19122402	-0.0305862	-9.65565	6.78297e-21
rs7965226	cg19122402	-0.0305862	-9.65565	6.78297e-21
rs11065917	cg19122402	-0.0305862	-9.65565	6.78297e-21
rs7298960	cg19122402	-0.0305862	-9.65565	6.78297e-21
rs12300465	cg19122402	-0.0305862	-9.65565	6.78297e-21
rs10161383	cg19122402	-0.0305862	-9.65565	6.78297e-21
rs11065922	cg19122402	-0.0305862	-9.65565	6.78297e-21
rs74882580	cg19122402	-0.0305862	-9.65565	6.78297e-21
rs113491100	cg19122402	-0.0305862	-9.65565	6.78297e-21
rs12309980	cg19122402	-0.0305862	-9.65565	6.78297e-21
rs111279477	cg19122402	-0.0305862	-9.65565	6.78297e-21
rs10400565	cg19122402	-0.0305862	-9.65565	6.78297e-21
rs12301101	cg19122402	-0.0305862	-9.65565	6.78297e-21
rs10400583	cg19122402	-0.0305862	-9.65565	6.78297e-21
rs10400460	cg19122402	-0.0305862	-9.65565	6.78297e-21
rs10400469	cg19122402	-0.0305862	-9.65565	6.78297e-21
rs11065924	cg19122402	-0.0305862	-9.65565	6.78297e-21
rs11065925	cg19122402	-0.0305862	-9.65565	6.78297e-21
rs149637511	cg19122402	-0.0305862	-9.65565	6.78297e-21
rs7970626	cg19122402	-0.0305862	-9.65565	6.78297e-21
rs58740648	cg19122402	-0.0305862	-9.65565	6.78297e-21
rs11837800	cg19122402	-0.0306131	-9.65441	6.85682e-21
rs10400458	cg19122402	-0.0305805	-9.65241	6.97703e-21
rs113715032	cg19122402	-0.0305722	-9.64811	7.24249e-21
rs73414502	cg19122402	-0.0306721	-9.6479	7.25597e-21
rs6490172	cg19122402	-0.0305624	-9.64489	7.44827e-21
rs16941540	cg19122402	-0.0305624	-9.64489	7.44827e-21
rs59829184	cg19122402	-0.0305624	-9.64489	7.44827e-21
rs12310120	cg19122402	-0.0305624	-9.64489	7.44827e-21
rs11836810	cg19122402	-0.0305624	-9.64489	7.44827e-21
rs7139444	cg19122402	-0.0305624	-9.64489	7.44827e-21
rs7302641	cg19122402	-0.0305624	-9.64489	7.44827e-21
rs16941551	cg19122402	-0.0305624	-9.64489	7.44827e-21
rs7301355	cg19122402	-0.0305624	-9.64489	7.44827e-21
rs7305662	cg19122402	-0.0305624	-9.64489	7.44827e-21
rs7978331	cg19122402	-0.0305624	-9.64489	7.44827e-21
rs7136679	cg19122402	-0.0305624	-9.64489	7.44827e-21
rs73416404	cg19122402	-0.0306911	-9.64474	7.45777e-21
rs12308557	cg19122402	-0.0307236	-9.64268	7.59265e-21
rs56945768	cg19122402	-0.0306361	-9.63528	8.09713e-21
rs73414496	cg19122402	-0.0306361	-9.63528	8.09713e-21
rs112336421	cg19122402	-0.0306361	-9.63528	8.09713e-21
rs77640557	cg19122402	-0.0306361	-9.63528	8.09713e-21
rs12308744	cg19122402	-0.0306361	-9.63528	8.09713e-21
rs112009841	cg19122402	-0.0306361	-9.63528	8.09713e-21
rs111717860	cg19122402	-0.0306361	-9.63528	8.09713e-21
rs12316988	cg19122402	-0.0306978	-9.63392	8.19327e-21
rs12296408	cg19122402	-0.0306978	-9.63392	8.19327e-21
rs6490231	cg19122402	-0.0306978	-9.63392	8.19327e-21
rs142496500	cg19122402	-0.030629	-9.63296	8.26181e-21
rs58350765	cg19122402	-0.030629	-9.63296	8.26181e-21
rs11065951	cg19122402	-0.0306633	-9.63151	8.36672e-21
rs4765611	cg14849578	0.0276725	9.62553	8.81199e-21
rs113075607	cg19122402	-0.0305456	-9.61969	9.26997e-21
rs60473879	cg19122402	-0.0305456	-9.61969	9.26997e-21
rs3782287	cg14849578	0.0275418	9.61732	9.46311e-21
rs11065945	cg19122402	-0.0305884	-9.61681	9.50449e-21
rs12819677	cg14849578	0.0276782	9.61104	9.99196e-21
rs7973327	cg19122402	-0.0305022	-9.60076	1.09236e-20
rs10849954	cg19122402	-0.0304385	-9.59089	1.18979e-20
rs7977725	cg19122402	-0.0303789	-9.58846	1.21509e-20
rs7970627	cg19122402	-0.0303789	-9.58846	1.21509e-20
rs7136567	cg19122402	-0.0303789	-9.58846	1.21509e-20
rs7978231	cg19122402	-0.0303789	-9.58846	1.21509e-20
rs7312583	cg19122402	-0.0303789	-9.58846	1.21509e-20
rs11065932	cg19122402	-0.0303106	-9.58128	1.29293e-20
rs113621672	cg19122402	-0.0303321	-9.58029	1.30406e-20
rs11065934	cg19122402	-0.0301803	-9.53483	1.93069e-20
rs7307870	cg19122402	-0.0301803	-9.53483	1.93069e-20
rs10160956	cg19122402	-0.0303249	-9.49246	2.77957e-20
rs7976102	cg19122402	-0.0303249	-9.49246	2.77957e-20
rs7967698	cg19122402	-0.0301085	-9.48843	2.87746e-20
rs11065938	cg19122402	-0.0300837	-9.48453	2.97543e-20
rs1619561	cg08238129	-0.0247537	-9.48066	3.07575e-20
rs989892	cg14849578	0.0272062	9.47626	3.19421e-20
rs1616131	cg08238129	-0.0247089	-9.46902	3.39867e-20
rs1616181	cg08238129	-0.0247089	-9.46902	3.39867e-20
rs1727318	cg08238129	-0.0246467	-9.4636	3.56015e-20
rs2851441	cg08238129	-0.0246467	-9.4636	3.56015e-20
rs2695482	cg08238129	-0.0246467	-9.4636	3.56015e-20
rs12317695	cg19122402	-0.0300688	-9.46078	3.64725e-20
rs28452544	cg19122402	-0.0300688	-9.46078	3.64725e-20
rs16934167	cg19122402	-0.0300688	-9.46078	3.64725e-20
rs147850370	cg19122402	-0.0300688	-9.46078	3.64725e-20
rs73415535	cg08238129	-0.0367279	-9.45789	3.73872e-20
rs1790115	cg08238129	-0.0246068	-9.44564	4.15186e-20
rs4765176	cg14849578	0.0273218	9.44028	4.34662e-20
rs7979403	cg19122402	-0.0300755	-9.42302	5.03719e-20
rs7967067	cg19122402	-0.0298887	-9.40867	5.69358e-20
rs897717	cg12053291	-0.024963	-9.40337	5.95689e-20
rs114675193	cg27246571	-0.0469123	-9.36668	8.13995e-20
rs12322336	cg27246571	-0.0469123	-9.36668	8.13995e-20
rs1569068	cg08238129	-0.0243248	-9.35429	9.04385e-20
rs1790090	cg08238129	-0.0243248	-9.35429	9.04385e-20
rs949142	cg08238129	-0.0243248	-9.35429	9.04385e-20
rs884548	cg08238129	-0.0243248	-9.35429	9.04385e-20
rs12819677	cg12053291	0.0258579	9.3295	1.11597e-19
rs762785	cg23935522	-0.0274225	-9.28422	1.63661e-19
rs12299755	cg27246571	-0.0464774	-9.27651	1.74666e-19
rs12310175	cg27246571	-0.0464774	-9.27651	1.74666e-19
rs4762138	cg03247247	-0.0233247	-9.27497	1.76949e-19
rs11609859	cg12053291	0.0256198	9.26932	1.85577e-19
rs11608501	cg12053291	0.0256198	9.26932	1.85577e-19
rs4765176	cg12053291	0.025751	9.25494	2.09484e-19
rs838866	cg25283432	-0.0138713	-9.25482	2.09698e-19
chr12:111900775	cg19122402	-0.0301968	-9.25462	2.10054e-19
rs989892	cg12053291	0.0255038	9.23436	2.49077e-19
rs3782287	cg12053291	0.025442	9.21925	2.82803e-19
rs12721569	cg27246571	-0.0462407	-9.20806	3.10628e-19
rs10744147	cg08238129	-0.0259449	-9.16673	4.39042e-19
rs10772993	cg08238129	-0.0259449	-9.16673	4.39042e-19
rs7969891	cg19122402	-0.0295562	-9.16203	4.56646e-19
rs1106241	cg08238129	-0.0239834	-9.15873	4.69418e-19
rs11065929	cg19122402	-0.0293644	-9.14014	5.48186e-19
rs6539759	cg23935522	-0.026726	-9.13142	5.8951e-19
rs4761452	cg23935522	-0.026726	-9.13142	5.8951e-19
rs762786	cg23935522	-0.026726	-9.13142	5.8951e-19
rs113715032	cg07058694	-0.0198364	-9.08353	8.77906e-19
rs1617434	cg08238129	-0.0257618	-9.08304	8.81438e-19
rs1790123	cg08238129	-0.0269874	-9.08069	8.98834e-19
rs7977725	cg07058694	-0.0198146	-9.08058	8.99647e-19
rs7970627	cg07058694	-0.0198146	-9.08058	8.99647e-19
rs7136567	cg07058694	-0.0198146	-9.08058	8.99647e-19
rs7978231	cg07058694	-0.0198146	-9.08058	8.99647e-19
rs7312583	cg07058694	-0.0198146	-9.08058	8.99647e-19
rs10400458	cg07058694	-0.0198273	-9.08018	9.02604e-19
rs4765611	cg12053291	0.0251491	9.06162	1.05273e-18
rs7302805	cg07058694	-0.019788	-9.06139	1.0547e-18
rs11065908	cg07058694	-0.019788	-9.06139	1.0547e-18
rs11065909	cg07058694	-0.019788	-9.06139	1.0547e-18
rs11065910	cg07058694	-0.019788	-9.06139	1.0547e-18
rs6490140	cg07058694	-0.019788	-9.06139	1.0547e-18
rs76709544	cg07058694	-0.019788	-9.06139	1.0547e-18
rs12310522	cg07058694	-0.019788	-9.06139	1.0547e-18
rs11065912	cg07058694	-0.019788	-9.06139	1.0547e-18
rs12299425	cg07058694	-0.019788	-9.06139	1.0547e-18
rs7961399	cg07058694	-0.019788	-9.06139	1.0547e-18
rs11065915	cg07058694	-0.019788	-9.06139	1.0547e-18
rs12299245	cg07058694	-0.019788	-9.06139	1.0547e-18
rs12300764	cg07058694	-0.019788	-9.06139	1.0547e-18
rs7965226	cg07058694	-0.019788	-9.06139	1.0547e-18
rs11065917	cg07058694	-0.019788	-9.06139	1.0547e-18
rs7298960	cg07058694	-0.019788	-9.06139	1.0547e-18
rs12300465	cg07058694	-0.019788	-9.06139	1.0547e-18
rs10161383	cg07058694	-0.019788	-9.06139	1.0547e-18
rs11065922	cg07058694	-0.019788	-9.06139	1.0547e-18
rs74882580	cg07058694	-0.019788	-9.06139	1.0547e-18
rs113491100	cg07058694	-0.019788	-9.06139	1.0547e-18
rs12309980	cg07058694	-0.019788	-9.06139	1.0547e-18
rs111279477	cg07058694	-0.019788	-9.06139	1.0547e-18
rs10400565	cg07058694	-0.019788	-9.06139	1.0547e-18
rs12301101	cg07058694	-0.019788	-9.06139	1.0547e-18
rs10400583	cg07058694	-0.019788	-9.06139	1.0547e-18
rs10400460	cg07058694	-0.019788	-9.06139	1.0547e-18
rs10400469	cg07058694	-0.019788	-9.06139	1.0547e-18
rs11065924	cg07058694	-0.019788	-9.06139	1.0547e-18
rs11065925	cg07058694	-0.019788	-9.06139	1.0547e-18
rs149637511	cg07058694	-0.019788	-9.06139	1.0547e-18
rs7970626	cg07058694	-0.019788	-9.06139	1.0547e-18
rs58740648	cg07058694	-0.019788	-9.06139	1.0547e-18
rs12319091	cg07058694	-0.0198832	-9.05996	1.06732e-18
rs10746288	cg23935522	-0.0267513	-9.05973	1.06938e-18
rs4631927	cg23935522	-0.0267167	-9.04126	1.24592e-18
rs11065899	cg07058694	-0.0197518	-9.03134	1.35235e-18
rs12312248	cg07058694	-0.0197518	-9.03134	1.35235e-18
rs11065932	cg07058694	-0.0196678	-9.02192	1.4617e-18
rs73416404	cg07058694	-0.0197945	-9.02036	1.48073e-18
rs6490172	cg07058694	-0.0197052	-9.01729	1.51873e-18
rs16941540	cg07058694	-0.0197052	-9.01729	1.51873e-18
rs59829184	cg07058694	-0.0197052	-9.01729	1.51873e-18
rs12310120	cg07058694	-0.0197052	-9.01729	1.51873e-18
rs11836810	cg07058694	-0.0197052	-9.01729	1.51873e-18
rs7139444	cg07058694	-0.0197052	-9.01729	1.51873e-18
rs7302641	cg07058694	-0.0197052	-9.01729	1.51873e-18
rs16941551	cg07058694	-0.0197052	-9.01729	1.51873e-18
rs7301355	cg07058694	-0.0197052	-9.01729	1.51873e-18
rs7305662	cg07058694	-0.0197052	-9.01729	1.51873e-18
rs7978331	cg07058694	-0.0197052	-9.01729	1.51873e-18
rs7136679	cg07058694	-0.0197052	-9.01729	1.51873e-18
rs1270594	cg08238129	-0.0266697	-9.01399	1.56056e-18
rs10849954	cg07058694	-0.0197135	-9.01202	1.5861e-18
rs7967067	cg07058694	-0.0196917	-9.01161	1.59155e-18
rs11065938	cg07058694	-0.0196626	-9.00377	1.6978e-18
rs11834632	cg07058694	-0.0197132	-9.00168	1.72725e-18
rs57018784	cg07058694	-0.0198022	-8.99182	1.87345e-18
rs12301866	cg07058694	-0.019762	-8.98981	1.90468e-18
rs12320499	cg07058694	-0.0197128	-8.98826	1.92915e-18
rs11065896	cg07058694	-0.0197128	-8.98826	1.92915e-18
rs12316988	cg07058694	-0.0197353	-8.9784	2.09207e-18
rs12296408	cg07058694	-0.0197353	-8.9784	2.09207e-18
rs6490231	cg07058694	-0.0197353	-8.9784	2.09207e-18
rs12308557	cg07058694	-0.0197343	-8.9776	2.10596e-18
rs113621672	cg07058694	-0.0195871	-8.9731	2.1852e-18
rs10778920	cg23935522	-0.0268856	-8.96543	2.32745e-18
rs4038311	cg25283432	0.0118781	8.96252	2.38365e-18
rs7973327	cg07058694	-0.0196376	-8.9621	2.39191e-18
rs11830222	cg07058694	-0.0197128	-8.95867	2.46031e-18
rs11831659	cg07058694	-0.0197128	-8.95867	2.46031e-18
rs7963692	cg07058694	-0.0197128	-8.95867	2.46031e-18
rs7972796	cg07058694	-0.0197128	-8.95867	2.46031e-18
rs12307162	cg07058694	-0.0197128	-8.95867	2.46031e-18
rs73428145	cg07058694	-0.0197128	-8.95867	2.46031e-18
rs11837210	cg07058694	-0.0197128	-8.95867	2.46031e-18
rs11829746	cg07058694	-0.0197128	-8.95867	2.46031e-18
rs113474528	cg07058694	-0.0197128	-8.95867	2.46031e-18
rs12306935	cg07058694	-0.0197128	-8.95867	2.46031e-18
rs10160956	cg07058694	-0.0197082	-8.95492	2.53726e-18
rs7976102	cg07058694	-0.0197082	-8.95492	2.53726e-18
rs11065900	cg07058694	-0.0196078	-8.95456	2.54463e-18
rs7309993	cg07058694	-0.0195881	-8.9498	2.6459e-18
rs12301585	cg07058694	-0.0195881	-8.9498	2.6459e-18
rs7956220	cg07058694	-0.0195881	-8.9498	2.6459e-18
rs56142475	cg07058694	-0.0195881	-8.9498	2.6459e-18
rs73414502	cg07058694	-0.0196248	-8.94392	2.77675e-18
rs10846737	cg14849578	0.0255763	8.94183	2.82473e-18
rs112022408	cg07058694	-0.0195701	-8.93989	2.86999e-18
rs142496500	cg07058694	-0.0196137	-8.93855	2.90153e-18
rs58350765	cg07058694	-0.0196137	-8.93855	2.90153e-18
rs7295678	cg07058694	-0.0195706	-8.93489	2.98988e-18
rs11065934	cg07058694	-0.0194946	-8.93383	3.016e-18
rs7307870	cg07058694	-0.0194946	-8.93383	3.016e-18
rs7135117	cg14849578	-0.0259526	-8.93153	3.07333e-18
rs1107853	cg07058694	-0.0195503	-8.92627	3.20852e-18
rs73410519	cg07058694	-0.0195503	-8.92627	3.20852e-18
rs14555	cg07058694	-0.0195503	-8.92627	3.20852e-18
rs7311116	cg07058694	-0.0195503	-8.92627	3.20852e-18
rs73410508	cg07058694	-0.0195632	-8.9244	3.25823e-18
rs60612310	cg07058694	-0.0195632	-8.9244	3.25823e-18
rs7964509	cg07058694	-0.0195632	-8.9244	3.25823e-18
rs28615162	cg07058694	-0.0195632	-8.9244	3.25823e-18
rs7305955	cg07058694	-0.0195632	-8.9244	3.25823e-18
rs11065902	cg07058694	-0.0195632	-8.9244	3.25823e-18
rs12315206	cg07058694	-0.0195632	-8.9244	3.25823e-18
rs73410513	cg07058694	-0.0195632	-8.9244	3.25823e-18
rs10862666	cg23935522	-0.0267175	-8.92241	3.31164e-18
rs7299305	cg07058694	-0.0195531	-8.92016	3.37301e-18
rs113075607	cg07058694	-0.0195274	-8.90987	3.66924e-18
rs60473879	cg07058694	-0.0195274	-8.90987	3.66924e-18
rs4761450	cg23935522	-0.0266588	-8.90913	3.69143e-18
rs7300299	cg23935522	-0.0266588	-8.90913	3.69143e-18
rs7304988	cg23935522	-0.0266588	-8.90913	3.69143e-18
rs1477752	cg23935522	-0.0266588	-8.90913	3.69143e-18
rs4318021	cg23935522	-0.0266588	-8.90913	3.69143e-18
rs10746272	cg23935522	-0.0266588	-8.90913	3.69143e-18
rs4761343	cg23935522	-0.0266588	-8.90913	3.69143e-18
rs1874301	cg23935522	-0.0266588	-8.90913	3.69143e-18
rs1874300	cg23935522	-0.0266588	-8.90913	3.69143e-18
rs75118013	cg23935522	-0.0268306	-8.9043	3.84016e-18
rs6539705	cg23935522	-0.0266483	-8.90397	3.85038e-18
rs6539707	cg23935522	-0.0266483	-8.90397	3.85038e-18
rs12298548	cg07058694	-0.0195377	-8.9031	3.87795e-18
rs7301140	cg07058694	-0.0195377	-8.9031	3.87795e-18
rs11065951	cg07058694	-0.0195578	-8.89814	4.03831e-18
rs11837800	cg07058694	-0.0194794	-8.8956	4.12276e-18
rs11115603	cg23935522	-0.0266198	-8.8939	4.1806e-18
rs58982895	cg07058694	-0.0195157	-8.87402	4.91632e-18
rs73412464	cg07058694	-0.0194379	-8.86766	5.17773e-18
rs11065944	cg07058694	-0.0194379	-8.86766	5.17773e-18
rs7971276	cg07058694	-0.0194379	-8.86766	5.17773e-18
rs41500449	cg07058694	-0.0194379	-8.86766	5.17773e-18
rs10849955	cg07058694	-0.0194379	-8.86766	5.17773e-18
rs73412478	cg07058694	-0.0194379	-8.86766	5.17773e-18
rs12315171	cg07058694	-0.0194379	-8.86766	5.17773e-18
rs7311293	cg07058694	-0.0194379	-8.86766	5.17773e-18
rs12301021	cg07058694	-0.0194379	-8.86766	5.17773e-18
rs7308857	cg07058694	-0.0194379	-8.86766	5.17773e-18
rs73414453	cg07058694	-0.0194379	-8.86766	5.17773e-18
rs9971826	cg07058694	-0.0194379	-8.86766	5.17773e-18
rs9971887	cg07058694	-0.0194379	-8.86766	5.17773e-18
rs13377932	cg07058694	-0.0194379	-8.86766	5.17773e-18
rs60443842	cg07058694	-0.0194379	-8.86766	5.17773e-18
rs7137348	cg07058694	-0.0194379	-8.86766	5.17773e-18
rs11065954	cg07058694	-0.0194379	-8.86766	5.17773e-18
rs28823331	cg07058694	-0.0194379	-8.86766	5.17773e-18
rs77001757	cg07058694	-0.0194379	-8.86766	5.17773e-18
rs12314647	cg07058694	-0.0194379	-8.86766	5.17773e-18
rs7953144	cg07058694	-0.0194379	-8.86766	5.17773e-18
rs7964354	cg07058694	-0.0194379	-8.86766	5.17773e-18
rs77110671	cg07058694	-0.0194379	-8.86766	5.17773e-18
rs16941578	cg07058694	-0.0194379	-8.86766	5.17773e-18
rs7972340	cg07058694	-0.0194379	-8.86766	5.17773e-18
rs113485398	cg07058694	-0.0194379	-8.86766	5.17773e-18
rs146415388	cg07058694	-0.0194379	-8.86766	5.17773e-18
rs7298107	cg07058694	-0.0194379	-8.86766	5.17773e-18
rs11065956	cg07058694	-0.0194379	-8.86766	5.17773e-18
rs11065957	cg07058694	-0.0194379	-8.86766	5.17773e-18
rs11065958	cg07058694	-0.0194379	-8.86766	5.17773e-18
rs6490216	cg07058694	-0.0194379	-8.86766	5.17773e-18
rs73322246	cg21786775	0.0295367	8.85925	5.54452e-18
rs73322250	cg21786775	0.0295367	8.85925	5.54452e-18
rs7967698	cg07058694	-0.0193842	-8.85865	5.57144e-18
rs12300359	cg07058694	-0.0194204	-8.85728	5.63414e-18
rs11065936	cg07058694	-0.0194191	-8.857	5.6466e-18
rs7301374	cg07058694	-0.0194191	-8.857	5.6466e-18
rs7305546	cg07058694	-0.0194191	-8.857	5.6466e-18
rs9804704	cg07058694	-0.0194191	-8.857	5.6466e-18
rs4761448	cg23935522	-0.0264513	-8.84957	5.99845e-18
rs2126682	cg23935522	-0.0264513	-8.84957	5.99845e-18
rs34349995	cg23935522	-0.0264673	-8.84319	6.31766e-18
rs11065945	cg07058694	-0.0194225	-8.8408	6.44147e-18
rs7956181	cg18728406	0.0187548	8.82351	7.4123e-18
rs57429061	cg07058694	-0.0195201	-8.82172	7.52075e-18
rs1477744	cg23935522	-0.0262337	-8.79906	9.03577e-18
rs12317695	cg07058694	-0.0192733	-8.79035	9.69588e-18
rs28452544	cg07058694	-0.0192733	-8.79035	9.69588e-18
rs16934167	cg07058694	-0.0192733	-8.79035	9.69588e-18
rs147850370	cg07058694	-0.0192733	-8.79035	9.69588e-18
rs1136294	cg23935522	-0.0261803	-8.78497	1.01269e-17
rs872239	cg23935522	-0.0261803	-8.78497	1.01269e-17
rs10735466	cg23935522	-0.0245947	-8.77229	1.1219e-17
rs4761342	cg23935522	-0.0261239	-8.77218	1.12289e-17
rs2369351	cg23935522	-0.0261239	-8.77218	1.12289e-17
rs10778948	cg23935522	-0.0261239	-8.77218	1.12289e-17
rs10862594	cg23935522	-0.0261239	-8.77218	1.12289e-17
rs7488137	cg23935522	-0.0261239	-8.77218	1.12289e-17
rs10778951	cg23935522	-0.0261239	-8.77218	1.12289e-17
rs7315540	cg23935522	-0.0261239	-8.77218	1.12289e-17
rs1540589	cg23935522	-0.0261239	-8.77218	1.12289e-17
rs5023608	cg23935522	-0.0261239	-8.77218	1.12289e-17
rs1532369	cg23935522	-0.0261239	-8.77218	1.12289e-17
rs1495332	cg23935522	-0.0261239	-8.77218	1.12289e-17
rs1587113	cg23935522	-0.0261239	-8.77218	1.12289e-17
rs113507458	cg19122402	-0.028913	-8.76343	1.20503e-17
rs7979403	cg07058694	-0.0192785	-8.75621	1.27724e-17
rs4444124	cg23935522	-0.0260825	-8.75617	1.27773e-17
rs702062	cg23935522	-0.0260757	-8.75291	1.31166e-17
rs702063	cg23935522	-0.0260757	-8.75291	1.31166e-17
rs1105963	cg23935522	-0.0260757	-8.75291	1.31166e-17
rs56945768	cg07058694	-0.0192419	-8.75186	1.32283e-17
rs73414496	cg07058694	-0.0192419	-8.75186	1.32283e-17
rs112336421	cg07058694	-0.0192419	-8.75186	1.32283e-17
rs77640557	cg07058694	-0.0192419	-8.75186	1.32283e-17
rs12308744	cg07058694	-0.0192419	-8.75186	1.32283e-17
rs112009841	cg07058694	-0.0192419	-8.75186	1.32283e-17
rs111717860	cg07058694	-0.0192419	-8.75186	1.32283e-17
rs113372995	cg15112006	-0.0356438	-8.74201	1.43211e-17
rs34137827	cg25283432	-0.017804	-8.71158	1.82909e-17
rs113964984	cg08238129	-0.0256419	-8.70916	1.86495e-17
rs7135903	cg23935522	-0.0246996	-8.7087	1.87177e-17
rs10846736	cg14849578	0.0253391	8.69598	2.07289e-17
rs58703088	cg15112006	-0.035394	-8.69535	2.08331e-17
rs12320433	cg15112006	-0.035394	-8.69535	2.08331e-17
rs11574799	cg21786775	0.0392544	8.69472	2.09393e-17
rs11065929	cg07058694	-0.0192031	-8.68534	2.25743e-17
rs2851435	cg08238129	-0.0253804	-8.67467	2.45859e-17
rs7314589	cg23935522	-0.0260016	-8.66995	2.55328e-17
chr12:111900777	cg19122402	-0.0287345	-8.66848	2.5834e-17
rs1587112	cg23935522	-0.0257765	-8.65429	2.89376e-17
rs1587111	cg23935522	-0.0257765	-8.65429	2.89376e-17
rs7968108	cg23935522	-0.0257765	-8.65429	2.89376e-17
rs1979743	cg23935522	-0.0257765	-8.65429	2.89376e-17
rs7297641	cg04415310	-0.0358485	-8.64727	3.06063e-17
chr12:111900775	cg07058694	-0.0194479	-8.64656	3.07792e-17
rs7306096	cg23935522	-0.0258929	-8.63757	3.3068e-17
rs10735459	cg23935522	-0.0258161	-8.63381	3.40754e-17
rs7969891	cg07058694	-0.0191743	-8.62968	3.5215e-17
rs4762139	cg03247247	-0.0247911	-8.62504	3.65403e-17
rs74087196	cg18728406	0.0370073	8.61768	3.87456e-17
rs7300303	cg23935522	-0.0256574	-8.61351	4.00546e-17
rs2302902	cg03247247	-0.0246168	-8.61209	4.05078e-17
rs66654576	cg23935522	-0.0263631	-8.61102	4.08566e-17
rs4761453	cg23935522	-0.0255182	-8.6053	4.27555e-17
rs7312867	cg23935522	-0.024345	-8.57007	5.65511e-17
rs10778910	cg23935522	-0.0254758	-8.55714	6.26491e-17
rs7315554	cg23935522	-0.0255799	-8.5516	6.54564e-17
rs10846737	cg12053291	0.023533	8.53965	7.19423e-17
rs10862579	cg23935522	-0.0253568	-8.53905	7.22843e-17
rs2047226	cg23935522	-0.0254654	-8.53887	7.23892e-17
rs1477747	cg23935522	-0.0254691	-8.52248	8.23903e-17
rs4604937	cg23935522	-0.0253124	-8.51698	8.60448e-17
rs4315131	cg23935522	-0.0253124	-8.51698	8.60448e-17
rs10746289	cg23935522	-0.0253124	-8.51698	8.60448e-17
rs10746290	cg23935522	-0.0253124	-8.51698	8.60448e-17
rs2247570	cg27246571	-0.0268135	-8.51128	8.99996e-17
rs2047227	cg23935522	-0.0251745	-8.45161	1.43842e-16
rs1716161	cg08238129	0.0223455	8.43562	1.63033e-16
rs2682432	cg08238129	0.0223455	8.43562	1.63033e-16
rs7133597	cg23935522	-0.0250976	-8.43556	1.63101e-16
rs7305217	cg23935522	-0.0252821	-8.43395	1.65179e-16
rs113507458	cg07058694	-0.0191013	-8.42363	1.79059e-16
rs7134204	cg02369308	-0.0264685	-8.4192	1.85361e-16
rs10778935	cg23935522	0.024354	8.41633	1.89571e-16
rs4765176	cg25283432	0.0113802	8.40337	2.09742e-16
rs11609859	cg25283432	0.0113041	8.40148	2.12865e-16
rs11608501	cg25283432	0.0113041	8.40148	2.12865e-16
rs7955841	cg08238129	0.0216308	8.39769	2.19248e-16
rs1727291	cg08238129	0.0223074	8.39634	2.21564e-16
rs7953929	cg08238129	-0.0245622	-8.39319	2.27067e-16
rs1477746	cg23935522	-0.0249353	-8.38615	2.39866e-16
rs7961303	cg08238129	0.0225027	8.37044	2.71064e-16
rs12818067	cg08238129	-0.0248341	-8.36845	2.75304e-16
rs34341465	cg08238129	-0.0248341	-8.36845	2.75304e-16
rs3782287	cg25283432	0.0112334	8.36316	2.86846e-16
rs989892	cg25283432	0.0112308	8.35238	3.11889e-16
rs10846736	cg12053291	0.0234294	8.35128	3.14572e-16
rs12819677	cg25283432	0.0112785	8.34937	3.1928e-16
rs61938417	cg04873208	0.0212955	8.34041	3.42241e-16
rs7309401	cg04873208	0.0212378	8.3241	3.88359e-16
rs1790103	cg08238129	0.0222327	8.32103	3.97695e-16
rs10862521	cg23935522	-0.024839	-8.31516	4.16152e-16
rs10778945	cg23935522	-0.0243033	-8.30713	4.42816e-16
rs10778950	cg23935522	-0.0242133	-8.29441	4.88553e-16
rs10735457	cg23935522	-0.0247011	-8.29237	4.96284e-16
rs77006204	cg18728406	-0.0317625	-8.28743	5.15563e-16
rs10847980	cg08238129	-0.0238928	-8.28368	5.30708e-16
rs12300962	cg18728406	-0.0317348	-8.28221	5.36761e-16
rs12300919	cg18728406	-0.0316736	-8.26385	6.1828e-16
rs2695474	cg08238129	-0.0219841	-8.25245	6.74951e-16
rs10862539	cg23935522	-0.0240584	-8.24664	7.05792e-16
rs7301720	cg25283432	-0.0168901	-8.24021	7.41481e-16
rs35033918	cg08238129	0.0222676	8.23256	7.86362e-16
rs10846737	cg25283432	0.0109738	8.22921	8.06839e-16
rs9668616	cg08238129	0.0222624	8.2286	8.10575e-16
rs75378222	cg18728406	-0.0315128	-8.21386	9.07557e-16
rs11057227	cg08238129	0.0222444	8.2069	9.57195e-16
rs11057228	cg08238129	0.0222444	8.2069	9.57195e-16
rs7306500	cg17281677	-0.0197799	-8.20614	9.62758e-16
rs4376959	cg05924780	0.0164928	8.20506	9.70754e-16
rs10431471	cg23935522	-0.0238855	-8.19056	1.08457e-15
rs4237885	cg23935522	-0.0238855	-8.19056	1.08457e-15
rs35207646	cg25283432	-0.0167793	-8.18679	1.1163e-15
rs4761971	cg09027699	-0.0251545	-8.18139	1.16332e-15
rs12318335	cg27246571	-0.0423341	-8.17994	1.17625e-15
rs1477748	cg23935522	-0.0245596	-8.17829	1.19113e-15
rs2045852	cg23935522	-0.023757	-8.17757	1.19772e-15
rs73301259	cg18728406	-0.0171309	-8.1638	1.33036e-15
rs376118456	cg25283432	-0.015171	-8.16225	1.34616e-15
rs201901986	cg25283432	-0.015171	-8.16225	1.34616e-15
rs1989413	cg23935522	-0.0236689	-8.14705	1.51123e-15
rs838868	cg12053291	-0.0210045	-8.13896	1.60711e-15
rs838867	cg12053291	-0.0210045	-8.13896	1.60711e-15
rs838865	cg12053291	-0.0210045	-8.13896	1.60711e-15
rs12299908	cg18728406	-0.019428	-8.13325	1.6784e-15
rs1260317	cg08238129	0.020817	8.12913	1.73174e-15
rs9669015	cg23935522	-0.0236537	-8.12537	1.78194e-15
rs7137064	cg23935522	-0.0240213	-8.12027	1.85227e-15
rs1017784	cg23935522	-0.0271975	-8.12014	1.8541e-15
rs9919713	cg12053291	-0.0209766	-8.11102	1.9869e-15
rs701107	cg12053291	-0.0211094	-8.10258	2.11806e-15
rs4765611	cg25283432	0.0109512	8.09972	2.16439e-15
rs78085991	cg08238129	0.020771	8.0922	2.2913e-15
rs7312055	cg19122402	-0.0268553	-8.06964	2.71714e-15
rs73372148	cg15112006	-0.0242593	-8.04001	3.39714e-15
rs7956014	cg27246571	-0.0416208	-8.02869	3.69914e-15
rs11108370	cg27246571	-0.0416208	-8.02869	3.69914e-15
rs838866	cg12053291	-0.0252349	-8.0198	3.95444e-15
chr12:111900777	cg07058694	-0.0183202	-8.017	4.03854e-15
rs73322252	cg21786775	0.0264013	8.01641	4.05662e-15
rs10846736	cg25283432	0.0108826	8.01453	4.11406e-15
rs11574795	cg21786775	0.0263755	8.01034	4.24573e-15
rs10083169	cg21786775	0.0263755	8.01034	4.24573e-15
rs10083026	cg21786775	0.0263755	8.01034	4.24573e-15
rs10082796	cg21786775	0.0263755	8.01034	4.24573e-15
rs10082798	cg21786775	0.0263755	8.01034	4.24573e-15
rs7135510	cg23935522	-0.0233083	-8.00259	4.49985e-15
rs73385896	cg04873208	0.0211767	7.97395	5.57588e-15
rs838895m	cg12053291	-0.0211723	-7.97101	5.69986e-15
rs12298595	cg27246571	-0.041371	-7.95698	6.32938e-15
rs10862489	cg23935522	-0.0231679	-7.95339	6.50093e-15
rs58131754	cg08238129	-0.0309428	-7.92634	7.9525e-15
rs838894	cg12053291	-0.0209271	-7.8977	9.83736e-15
rs4761446	cg23935522	-0.0231028	-7.89335	1.01599e-14
rs73418315	cg19122402	-0.0262406	-7.89098	1.03404e-14
rs10849965	cg19122402	-0.0262406	-7.89098	1.03404e-14
rs28680388	cg19122402	-0.0262406	-7.89098	1.03404e-14
rs34137827	cg12053291	-0.0336976	-7.88945	1.04582e-14
rs4761444	cg23935522	-0.0228461	-7.88475	1.08289e-14
rs58809476	cg08238129	-0.0236279	-7.8788	1.13163e-14
rs60622848	cg02369308	0.0216343	7.8777	1.14087e-14
rs7965040	cg19122402	0.0247171	7.86824	1.22359e-14
rs35647985	cg25283432	-0.0163238	-7.86332	1.2689e-14
rs12319170	cg19122402	-0.0266572	-7.84564	1.44594e-14
rs7301120	cg25283432	-0.0151172	-7.84289	1.47555e-14
rs115276392	cg06712932	0.0406588	7.82079	1.73636e-14
rs111806054	cg12053291	-0.0329521	-7.79185	2.14768e-14
rs838893	cg12053291	-0.0206218	-7.78724	2.22163e-14
rs12825652	cg08238129	-0.0212465	-7.77839	2.37037e-14
rs11108369	cg27246571	-0.0411094	-7.7759	2.41397e-14
rs2367755	cg27246571	-0.0251335	-7.77009	2.51889e-14
rs376118456	cg12053291	-0.0300487	-7.7696	2.52792e-14
rs201901986	cg12053291	-0.0300487	-7.7696	2.52792e-14
rs858156	cg12053291	-0.020472	-7.75857	2.74032e-14
rs4761234	cg18707141	0.0222565	7.75036	2.90984e-14
rs7138386	cg12053291	-0.0326189	-7.74241	3.08359e-14
rs858155	cg12053291	-0.0203751	-7.73751	3.19596e-14
rs838892	cg12053291	-0.020203	-7.7194	3.64666e-14
rs115372731	cg06712932	0.0410873	7.71862	3.66744e-14
rs55726594	cg05924780	0.0192515	7.71671	3.71883e-14
rs12811632	cg18707141	0.0224407	7.71403	3.79202e-14
rs1478464	cg18707141	0.0224407	7.71403	3.79202e-14
rs11177615	cg18707141	0.0224974	7.70208	4.13627e-14
rs7138386	cg25283432	-0.015641	-7.69229	4.44089e-14
rs1672879	cg12053291	-0.0198887	-7.67601	4.99726e-14
rs114917192	cg06712932	0.0370182	7.65567	5.79001e-14
rs116611876	cg06712932	0.0384252	7.63123	6.90744e-14
rs73418315	cg07058694	-0.0173969	-7.61876	7.55684e-14
rs10849965	cg07058694	-0.0173969	-7.61876	7.55684e-14
rs28680388	cg07058694	-0.0173969	-7.61876	7.55684e-14
rs35207646	cg12053291	-0.032542	-7.61802	7.59711e-14
rs80282440	cg07136393	-0.0569659	-9.72957	3.55894e-21
rs56972606	cg07136393	-0.0563598	-9.64686	7.32166e-21
rs2181667	cg07136393	-0.0531082	-9.52733	2.05953e-20
rs4773034	cg07136393	-0.039228	-9.32525	1.15686e-19
rs7984872	cg07136393	-0.0393019	-9.23083	2.56585e-19
rs275943	cg07136393	-0.0284081	-8.19688	1.03342e-15
rs275945	cg07136393	-0.0283463	-8.1835	1.14471e-15
rs275951	cg07136393	-0.0278283	-8.04373	3.30333e-15
rs138841600	cg16639691	-0.0283814	-8.03882	3.42775e-15
rs275948	cg07136393	-0.0275763	-7.98531	5.12156e-15
rs7317427	cg16639691	-0.0240756	-7.97105	5.69795e-15
rs7323163	cg16639691	-0.0240756	-7.97105	5.69795e-15
rs7139620	cg16639691	-0.0240756	-7.97105	5.69795e-15
rs7318543	cg16639691	-0.0240756	-7.97105	5.69795e-15
rs73439128	cg16639691	-0.0239159	-7.91383	8.72776e-15
rs7321675	cg22138494	0.0527536	7.8169	1.78684e-14
rs275949	cg07136393	-0.0274546	-7.80096	2.00876e-14
rs140918067	cg16639691	-0.0270509	-7.79954	2.02996e-14
rs73439135	cg16639691	-0.0236654	-7.76939	2.53181e-14
rs7338400	cg22138494	0.051543	7.72278	3.55797e-14
rs11844167	cg04348689	-0.0372856	-12.247	1.26475e-31
rs56118996	cg04348689	-0.0372856	-12.247	1.26475e-31
rs67502036	cg04348689	-0.0372856	-12.247	1.26475e-31
rs8013656	cg04348689	-0.0372856	-12.247	1.26475e-31
rs66499953	cg04348689	-0.0372856	-12.247	1.26475e-31
rs59530356	cg04348689	-0.0372856	-12.247	1.26475e-31
rs7155081	cg04348689	-0.0360058	-11.8137	1.04567e-29
rs17109462	cg20938047	-0.0420568	-11.714	2.84598e-29
rs11849185	cg20938047	-0.0420236	-11.6949	3.44185e-29
rs11847576	cg20938047	-0.0418407	-11.6491	5.43921e-29
rs10484034	cg04348689	-0.036118	-11.6084	8.16182e-29
rs57176727	cg04348689	-0.036118	-11.6084	8.16182e-29
rs80349404	cg20938047	-0.0415915	-11.6043	8.49981e-29
rs987056	cg20938047	-0.0414953	-11.5538	1.403e-28
rs17109380	cg20938047	-0.0414003	-11.5272	1.82556e-28
rs77757127	cg20938047	-0.0414003	-11.5272	1.82556e-28
rs55634005	cg04348689	-0.0360466	-11.5219	1.92353e-28
rs7155485	cg20938047	-0.0414314	-11.5187	1.98622e-28
rs75772222	cg20938047	-0.0413539	-11.5069	2.23183e-28
rs17109397	cg20938047	-0.0413539	-11.5069	2.23183e-28
rs11850786	cg20938047	-0.0412943	-11.5051	2.2711e-28
rs17109457	cg20938047	-0.0412943	-11.5051	2.2711e-28
rs80290239	cg20938047	-0.0412478	-11.4839	2.80187e-28
rs17109406	cg20938047	-0.0412478	-11.4839	2.80187e-28
rs17109382	cg20938047	-0.0411374	-11.4614	3.49868e-28
rs58424382	cg20938047	-0.0411374	-11.4614	3.49868e-28
rs8019222	cg20938047	-0.0409128	-11.3909	6.99588e-28
rs11851504	cg20938047	-0.0409128	-11.3909	6.99588e-28
rs7142073	cg20938047	-0.0409128	-11.3909	6.99588e-28
rs7154613	cg20938047	-0.0403669	-11.3573	9.73231e-28
rs17129005	cg04348689	-0.0339806	-11.3404	1.14849e-27
rs8003421	cg04348689	-0.0323154	-11.3029	1.65699e-27
rs12431720	cg04348689	-0.0323154	-11.3029	1.65699e-27
rs55702647	cg04348689	-0.0323154	-11.3029	1.65699e-27
rs17128991	cg04348689	-0.0323325	-11.2778	2.11486e-27
rs6575319	cg04348689	-0.03225	-11.272	2.2389e-27
rs11160113	cg04348689	-0.0321156	-11.2611	2.49073e-27
rs72708575	cg04348689	-0.0338677	-11.2417	3.00561e-27
rs66655074	cg04348689	-0.0338677	-11.2417	3.00561e-27
rs72708588	cg04348689	-0.0338677	-11.2417	3.00561e-27
rs59180923	cg04348689	-0.0338677	-11.2417	3.00561e-27
rs57538363	cg04348689	-0.0360506	-11.234	3.23926e-27
rs8009462	cg04348689	-0.0352801	-11.2139	3.94157e-27
rs7143030	cg04348689	-0.0337873	-11.204	4.33824e-27
rs17128958	cg04348689	-0.0350223	-11.126	9.22918e-27
rs17129016	cg04348689	-0.0332082	-10.9036	7.78367e-26
rs11628502	cg20938047	-0.0330713	-10.7624	2.96591e-25
rs28625718	cg20938047	-0.0328806	-10.6972	5.47887e-25
rs10138510	cg20938047	-0.0328806	-10.6972	5.47887e-25
rs74330991	cg20938047	-0.0327286	-10.6917	5.76676e-25
rs17109371	cg20938047	-0.0327993	-10.6745	6.77733e-25
rs58590969	cg20938047	-0.0394238	-10.6152	1.17994e-24
rs17109515	cg20938047	-0.0388864	-10.5327	2.5447e-24
rs7152812	cg20938047	-0.0390704	-10.4882	3.84284e-24
rs17109547	cg20938047	-0.0384595	-10.4617	4.91023e-24
rs17128960	cg04348689	-0.031979	-10.4457	5.68891e-24
rs77860416	cg20938047	-0.0385111	-10.4184	7.31808e-24
rs2094659	cg20938047	-0.0385445	-10.4137	7.64194e-24
rs138532866	cg20938047	-0.0385806	-10.3934	9.20786e-24
rs1952491	cg20938047	-0.0381922	-10.2711	2.82132e-23
rs7146059	cg04348689	-0.0294785	-10.2197	4.50335e-23
rs111413108	cg04348689	-0.032784	-10.184	6.22413e-23
rs66526709	cg04348689	-0.0303454	-10.137	9.52244e-23
rs58621064	cg04348689	-0.0303454	-10.137	9.52244e-23
rs72708593	cg04348689	-0.0300814	-9.98821	3.61917e-22
rs72708594	cg04348689	-0.0300814	-9.98821	3.61917e-22
rs2089095	cg04348689	-0.0300814	-9.98821	3.61917e-22
rs1952499	cg20938047	-0.0370044	-9.89434	8.34044e-22
rs6574172	cg20938047	-0.0332482	-9.7924	2.05104e-21
rs1952500	cg20938047	-0.0332482	-9.7924	2.05104e-21
rs8009085	cg04348689	-0.0302482	-9.75329	2.89129e-21
rs8023045	cg04348689	-0.0318539	-9.74318	3.1592e-21
rs2332465	cg20938047	-0.0329481	-9.7397	3.2569e-21
rs17109563	cg20938047	-0.0330005	-9.71333	4.10205e-21
rs143807952	cg20938047	-0.0325953	-9.68102	5.43837e-21
rs11847778	cg20938047	-0.032819	-9.65033	7.1044e-21
rs66494078	cg04348689	-0.0295431	-9.55272	1.65467e-20
rs76719523	cg20938047	-0.0339244	-9.53665	1.90057e-20
rs58205855	cg20938047	-0.0339244	-9.53665	1.90057e-20
rs61979914	cg20938047	-0.0320947	-9.52213	2.15378e-20
rs7146975	cg04348689	-0.0293958	-9.50578	2.47912e-20
rs187754499	cg04348689	-0.029295	-9.46209	3.60648e-20
rs61625648	cg04348689	-0.0289373	-9.46061	3.65254e-20
rs2781375	cg00302379	-0.0225406	-9.45797	3.73608e-20
rs58835753	cg04348689	-0.0267408	-9.33392	1.07492e-19
rs36020019	cg04348689	-0.0267408	-9.33392	1.07492e-19
rs111745536	cg04348689	-0.0266976	-9.31614	1.24963e-19
rs8016888	cg04348689	-0.0286649	-9.25767	2.04729e-19
rs2145175	cg01751040	0.0397497	9.23915	2.3926e-19
rs7153837	cg20938047	-0.0288237	-9.17421	4.1243e-19
rs7150646	cg00302379	-0.0215173	-9.10494	7.34856e-19
rs8008095	cg00302379	-0.0213598	-9.06929	9.87933e-19
rs942629	cg00302379	-0.0216952	-9.06697	1.00711e-18
rs35410051	cg00302379	-0.0213069	-9.02213	1.45926e-18
rs7145112	cg00302379	-0.0213069	-9.02213	1.45926e-18
rs8005829	cg00302379	-0.0216517	-8.94104	2.84309e-18
rs942628	cg00302379	-0.0213472	-8.93286	3.03998e-18
rs8011585	cg00302379	-0.0209147	-8.92816	3.1593e-18
rs8015921	cg00302379	-0.0209147	-8.92816	3.1593e-18
rs7152277	cg00302379	-0.0209528	-8.86712	5.2002e-18
rs6574131	cg20938047	-0.0270023	-8.7651	1.1889e-17
rs8004566	cg20938047	-0.0270023	-8.7651	1.1889e-17
rs8009099	cg20938047	-0.0270023	-8.7651	1.1889e-17
rs4902357	cg00302379	-0.0206268	-8.75788	1.26021e-17
rs1957948	cg00302379	-0.0205749	-8.72677	1.61883e-17
rs942626	cg00302379	-0.0205749	-8.72677	1.61883e-17
rs7159443	cg00302379	-0.0205749	-8.72677	1.61883e-17
rs8010213	cg00302379	-0.0205749	-8.72677	1.61883e-17
rs1998688	cg00302379	-0.0205749	-8.72677	1.61883e-17
rs1256417	cg00302379	-0.0205749	-8.72677	1.61883e-17
rs1124752	cg00302379	-0.0205749	-8.72677	1.61883e-17
rs2781373	cg00302379	-0.0205749	-8.72677	1.61883e-17
rs2781374	cg00302379	-0.0205749	-8.72677	1.61883e-17
rs35520739	cg00302379	-0.0212755	-8.71578	1.76837e-17
rs1271582	cg00302379	-0.0205875	-8.70433	1.93868e-17
rs978729	cg01751040	0.0454177	8.70123	1.98745e-17
rs1319577	cg01751040	0.0547176	8.698	2.03964e-17
rs10151162	cg00302379	-0.0206886	-8.66847	2.58372e-17
rs1157855	cg01751040	0.0453597	8.65568	2.86173e-17
rs1124751	cg00302379	-0.0202936	-8.65143	2.96052e-17
rs1270074	cg00302379	-0.0207171	-8.6508	2.97551e-17
rs4902360	cg00302379	-0.0204754	-8.64497	3.11723e-17
rs76347702	cg00813162	-0.0163356	-8.64297	3.16748e-17
rs2151755	cg00302379	-0.0210581	-8.60535	4.27388e-17
rs1953232	cg00302379	-0.0205222	-8.58396	5.06532e-17
rs2763888	cg00302379	-0.0205222	-8.58396	5.06532e-17
rs4902361	cg00302379	-0.0201414	-8.56875	5.71479e-17
rs57426267	cg20938047	-0.0265665	-8.56638	5.823e-17
rs57614343	cg20938047	-0.0265665	-8.56638	5.823e-17
rs1270073	cg00302379	-0.0202906	-8.52923	7.81176e-17
rs7158239	cg00302379	-0.0199224	-8.45887	1.35887e-16
rs4902359	cg00302379	-0.019852	-8.44965	1.46071e-16
rs28582724	cg26081786	0.0399201	8.43831	1.59639e-16
rs998247	cg00302379	-0.0220143	-8.43422	1.64821e-16
rs10143198	cg00302379	-0.0220143	-8.43422	1.64821e-16
rs1957949	cg00302379	-0.0218952	-8.38327	2.45306e-16
rs76892908	cg00813162	-0.016045	-8.36281	2.87625e-16
rs7146671	cg04348689	-0.0229829	-8.3534	3.09443e-16
rs954134	cg02121135	-0.0290151	-8.31724	4.09533e-16
rs10130025	cg26081786	0.0405582	8.27918	5.49421e-16
rs1958381	cg20938047	-0.0239874	-8.26488	6.13403e-16
rs8009515	cg04348689	-0.023265	-8.25476	6.63095e-16
rs1958383	cg20938047	-0.0240207	-8.25466	6.63576e-16
rs8004332	cg06724236	0.0201462	8.21081	9.28985e-16
rs8008618	cg20938047	-0.0256821	-8.20649	9.60251e-16
rs913684	cg20938047	-0.0238638	-8.19989	1.00992e-15
rs76521716	cg20938047	-0.0238638	-8.19989	1.00992e-15
rs76164821	cg20938047	-0.0238638	-8.19989	1.00992e-15
rs1121839	cg01751040	0.0453136	8.10048	2.15205e-15
rs10129213	cg02121135	-0.0299489	-8.08349	2.4473e-15
rs7156209	cg04348689	-0.0264239	-8.04605	3.24602e-15
rs57234033	cg06724236	0.0196505	8.04407	3.29473e-15
rs7157211	cg06724236	0.0196533	8.04268	3.32941e-15
rs28441403	cg06724236	0.0196444	8.03435	3.5449e-15
rs8005900	cg06724236	0.0196444	8.03435	3.5449e-15
rs11622939	cg04348689	0.0329726	8.02216	3.88512e-15
rs145444304	cg06724236	0.0195988	8.01916	3.97348e-15
rs8021621	cg06724236	0.0195988	8.01916	3.97348e-15
rs7143884	cg04348689	-0.0212369	-8.01852	3.99262e-15
rs10139684	cg06724236	0.0198331	8.00648	4.37035e-15
rs55786724	cg04348689	-0.0223064	-8.00605	4.3846e-15
rs7153350	cg06724236	0.019584	7.9741	5.56948e-15
rs11621084	cg04348689	0.0363497	7.97284	5.62212e-15
rs71419270	cg04348689	0.0363497	7.97284	5.62212e-15
rs3818468	cg06724236	0.0195177	7.95342	6.49972e-15
rs8020850	cg06724236	0.018928	7.93683	7.35503e-15
rs8015641	cg06724236	0.018928	7.93683	7.35503e-15
rs111481653	cg06724236	0.0193938	7.92728	7.89723e-15
rs8007866	cg06724236	0.0188942	7.91496	8.6544e-15
rs112591014	cg06724236	0.0188942	7.91496	8.6544e-15
rs181036398	cg06724236	0.0188942	7.91496	8.6544e-15
rs10144774	cg06724236	0.0188942	7.91496	8.6544e-15
rs10129185	cg06724236	0.0188942	7.91496	8.6544e-15
rs67968914	cg06724236	0.0188942	7.91496	8.6544e-15
rs373373073	cg06724236	0.0189252	7.91436	8.69323e-15
rs10133686	cg20938047	-0.0223815	-7.90431	9.36686e-15
rs7147345	cg20938047	-0.0223815	-7.90431	9.36686e-15
rs1952507	cg20938047	-0.022432	-7.88846	1.05351e-14
rs2296563	cg06724236	0.0189757	7.88788	1.05802e-14
rs12894309	cg04348689	0.0354652	7.88438	1.08586e-14
rs12896142	cg04348689	0.0354652	7.88438	1.08586e-14
rs12881444	cg04348689	0.0354652	7.88438	1.08586e-14
rs17129006	cg04348689	0.0354652	7.88438	1.08586e-14
rs12889579	cg04348689	0.0354652	7.88438	1.08586e-14
rs3783890	cg04348689	0.0354652	7.88438	1.08586e-14
rs34625843	cg04348689	0.0354652	7.88438	1.08586e-14
rs10139585	cg06724236	0.0194083	7.87812	1.13739e-14
rs8016024	cg06724236	0.018804	7.87469	1.16661e-14
rs8006042	cg06724236	0.018804	7.87469	1.16661e-14
rs6573769	cg06724236	0.018804	7.87469	1.16661e-14
rs58257525	cg06724236	0.018804	7.87469	1.16661e-14
rs12590065	cg06724236	0.018804	7.87469	1.16661e-14
rs113710634	cg06724236	0.018804	7.87469	1.16661e-14
rs56784297	cg06724236	0.018804	7.87469	1.16661e-14
rs10141180	cg06724236	0.018804	7.87469	1.16661e-14
rs66851210	cg06724236	0.018804	7.87469	1.16661e-14
rs1885590	cg06724236	0.0185884	7.85774	1.32235e-14
rs68002629	cg06724236	0.0185884	7.85774	1.32235e-14
rs12588292	cg06724236	0.0185884	7.85774	1.32235e-14
rs8019109	cg06724236	0.0185884	7.85774	1.32235e-14
rs960797	cg06724236	0.0185884	7.85774	1.32235e-14
rs2094162	cg06724236	0.0185884	7.85774	1.32235e-14
rs10138503	cg20938047	-0.0223382	-7.85636	1.33593e-14
rs34243429	cg04348689	0.0364136	7.85633	1.33618e-14
rs11621101m	cg04348689	0.0364136	7.85633	1.33618e-14
rs12885345	cg04348689	0.0364136	7.85633	1.33618e-14
rs71429789	cg04348689	0.0361439	7.84853	1.41539e-14
rs28527393	cg18431119	0.0212086	7.84696	1.43187e-14
rs10135498	cg06724236	0.0192531	7.8221	1.71976e-14
rs10147928	cg01751040	0.0488866	7.82082	1.73603e-14
rs59713276	cg04348689	0.0357851	7.81571	1.80244e-14
rs10484032	cg04348689	0.0357851	7.81571	1.80244e-14
rs12892710	cg04348689	0.0357851	7.81571	1.80244e-14
rs11628538	cg04348689	0.0357851	7.81571	1.80244e-14
rs11628518	cg04348689	0.0357851	7.81571	1.80244e-14
rs12587394	cg04348689	0.0357851	7.81571	1.80244e-14
rs61375994	cg04348689	0.0357851	7.81571	1.80244e-14
rs12884084	cg04348689	0.0357851	7.81571	1.80244e-14
rs8008544	cg20938047	-0.0222196	-7.81473	1.81555e-14
rs10135656	cg06724236	0.0186488	7.81197	1.85268e-14
rs58287888	cg06724236	0.0191312	7.80035	2.01788e-14
rs10220322	cg18431119	0.0208631	7.79505	2.09787e-14
rs117410330	cg20938047	-0.0222971	-7.79282	2.1325e-14
rs2243891	cg02121135	-0.028816	-7.79027	2.1727e-14
rs2295702	cg04348689	0.0365103	7.77925	2.35551e-14
rs55709912	cg01751040	0.045995	7.77688	2.39682e-14
rs7149869	cg20938047	-0.0209081	-7.77604	2.41164e-14
rs370064853	cg06724236	0.0191473	7.77333	2.45993e-14
rs10146663	cg06724236	0.0190917	7.77222	2.48001e-14
rs17129021	cg04348689	0.0308665	7.7687	2.54474e-14
rs71429791	cg04348689	0.035493	7.76577	2.59993e-14
rs2273640	cg04348689	0.035493	7.76577	2.59993e-14
rs35803481	cg04348689	0.035493	7.76577	2.59993e-14
rs28669280	cg06724236	0.019359	7.75825	2.7468e-14
rs10146389	cg06724236	0.0183865	7.7541	2.83143e-14
rs11621025	cg04348689	0.0359563	7.75238	2.86713e-14
rs73282707	cg06724236	0.0184981	7.75078	2.90097e-14
rs8007901	cg18431119	0.020741	7.74893	2.94033e-14
rs10143916	cg06724236	0.0190275	7.74883	2.94245e-14
rs73282717	cg06724236	0.0190275	7.74883	2.94245e-14
rs112603307	cg06724236	0.0190275	7.74883	2.94245e-14
rs17564263	cg06724236	0.0190275	7.74883	2.94245e-14
rs17093616	cg06724236	0.0190275	7.74883	2.94245e-14
rs10150902	cg06724236	0.0190275	7.74883	2.94245e-14
rs12589091	cg06724236	0.0190275	7.74883	2.94245e-14
rs12586552	cg06724236	0.0190275	7.74883	2.94245e-14
rs73282734	cg06724236	0.0190275	7.74883	2.94245e-14
rs10137026	cg06724236	0.0190275	7.74883	2.94245e-14
rs4058254	cg06724236	0.0190275	7.74883	2.94245e-14
rs1473733	cg06724236	0.0190275	7.74883	2.94245e-14
rs10135903	cg06724236	0.0190275	7.74883	2.94245e-14
rs73282746	cg06724236	0.0190275	7.74883	2.94245e-14
rs7160238	cg06724236	0.0190275	7.74883	2.94245e-14
rs7158743	cg06724236	0.0190275	7.74883	2.94245e-14
rs7158751	cg06724236	0.0190275	7.74883	2.94245e-14
rs17248567	cg06724236	0.0190275	7.74883	2.94245e-14
rs10129779	cg06724236	0.0190275	7.74883	2.94245e-14
rs7153965	cg06724236	0.0190275	7.74883	2.94245e-14
rs73282766	cg06724236	0.0190275	7.74883	2.94245e-14
rs17836702	cg06724236	0.0190275	7.74883	2.94245e-14
rs12588355	cg06724236	0.0190275	7.74883	2.94245e-14
rs73282776	cg06724236	0.0190275	7.74883	2.94245e-14
rs1885589	cg06724236	0.0190275	7.74883	2.94245e-14
rs1475129	cg06724236	0.0190275	7.74883	2.94245e-14
rs12589606	cg06724236	0.0190275	7.74883	2.94245e-14
rs3809387	cg06724236	0.0190275	7.74883	2.94245e-14
rs8014966	cg06724236	0.0190275	7.74883	2.94245e-14
rs8015302	cg06724236	0.0190275	7.74883	2.94245e-14
rs10138932	cg06724236	0.0190275	7.74883	2.94245e-14
rs2057396	cg06724236	0.0190275	7.74883	2.94245e-14
rs8021227	cg06724236	0.0190275	7.74883	2.94245e-14
rs12586609	cg06724236	0.0190275	7.74883	2.94245e-14
rs73282798	cg06724236	0.0190275	7.74883	2.94245e-14
rs8019398	cg06724236	0.0190275	7.74883	2.94245e-14
rs8018623	cg06724236	0.0190275	7.74883	2.94245e-14
rs4058266	cg06724236	0.0190275	7.74883	2.94245e-14
rs28866617	cg06724236	0.0190275	7.74883	2.94245e-14
rs28524846	cg06724236	0.0190275	7.74883	2.94245e-14
rs73284805	cg06724236	0.0190275	7.74883	2.94245e-14
rs12587679	cg06724236	0.0190275	7.74883	2.94245e-14
rs28458235	cg06724236	0.0190275	7.74883	2.94245e-14
rs10147640	cg06724236	0.0190275	7.74883	2.94245e-14
rs8020720	cg06724236	0.0190275	7.74883	2.94245e-14
rs2236333	cg06724236	0.0190275	7.74883	2.94245e-14
rs12590952	cg06724236	0.0190275	7.74883	2.94245e-14
rs2274335	cg06724236	0.0190275	7.74883	2.94245e-14
rs1045060	cg06724236	0.0190275	7.74883	2.94245e-14
rs113494736	cg06724236	0.0190275	7.74883	2.94245e-14
rs189843895	cg06724236	0.0190275	7.74883	2.94245e-14
rs58292941	cg06724236	0.0190275	7.74883	2.94245e-14
rs3825722	cg06724236	0.0190275	7.74883	2.94245e-14
rs3818467	cg06724236	0.0190275	7.74883	2.94245e-14
rs2274336	cg06724236	0.0190275	7.74883	2.94245e-14
rs28668536	cg06724236	0.0190275	7.74883	2.94245e-14
rs28422832	cg06724236	0.0190275	7.74883	2.94245e-14
rs2031563	cg06724236	0.0190275	7.74883	2.94245e-14
rs2274338	cg06724236	0.0190275	7.74883	2.94245e-14
rs10135163	cg06724236	0.0190275	7.74883	2.94245e-14
rs10131212	cg06724236	0.0190281	7.74817	2.95666e-14
rs10143251	cg06724236	0.0189158	7.74645	2.99412e-14
rs7142298	cg18431119	0.0206568	7.7392	3.1567e-14
rs11628028	cg04348689	0.0356627	7.73461	3.26417e-14
rs8016623	cg06724236	0.0189891	7.72946	3.38899e-14
rs8015285	cg06724236	0.0189904	7.72564	3.48466e-14
rs10136710	cg06724236	0.0189904	7.72564	3.48466e-14
rs1536272	cg06724236	0.0189904	7.72564	3.48466e-14
rs8006519	cg06724236	0.0189904	7.72564	3.48466e-14
rs1536273	cg06724236	0.0189904	7.72564	3.48466e-14
rs13379368	cg06724236	0.0189904	7.72564	3.48466e-14
rs13379142	cg06724236	0.0189904	7.72564	3.48466e-14
rs10137557	cg06724236	0.0189904	7.72564	3.48466e-14
rs56918786	cg06724236	0.0187264	7.72403	3.52572e-14
rs73282772	cg06724236	0.0189826	7.72296	3.55329e-14
rs12590553	cg04348689	0.0355943	7.71962	3.64075e-14
rs1318914	cg06724236	0.0189806	7.7175	3.69741e-14
rs10144417	cg06724236	0.0189315	7.70746	3.97763e-14
rs3759755	cg06724236	0.0189315	7.70746	3.97763e-14
rs17248714	cg06724236	0.0189315	7.70746	3.97763e-14
rs7156441	cg06724236	0.0189315	7.70746	3.97763e-14
rs28456209	cg06724236	0.0189315	7.70746	3.97763e-14
rs12588478	cg06724236	0.0189315	7.70746	3.97763e-14
rs12589671	cg06724236	0.0189315	7.70746	3.97763e-14
rs28558916	cg06724236	0.0189315	7.70746	3.97763e-14
rs2296560	cg06724236	0.0189315	7.70746	3.97763e-14
rs10143439	cg20938047	-0.0216531	-7.70408	4.07648e-14
rs73284812	cg06724236	0.0189688	7.70093	4.17091e-14
rs80301057	cg06724236	0.0189688	7.70093	4.17091e-14
rs8008619	cg06724236	0.0189282	7.7001	4.19623e-14
rs7146730	cg04348689	-0.0201772	-7.69962	4.21075e-14
rs12589983	cg06724236	0.0190487	7.68724	4.60655e-14
rs73284810	cg06724236	0.0190487	7.68724	4.60655e-14
rs12889783	cg04348689	0.0363201	7.68221	4.77788e-14
rs28405138	cg06724236	0.0189177	7.67908	4.88739e-14
rs17104223	cg06724236	0.0186719	7.67846	4.90965e-14
rs7144928	cg06724236	0.0186237	7.6723	5.13339e-14
rs10146722	cg06724236	0.0186237	7.6723	5.13339e-14
rs2146229	cg06724236	0.0186237	7.6723	5.13339e-14
rs12588388	cg06724236	0.0186237	7.6723	5.13339e-14
rs73282775	cg06724236	0.0186237	7.6723	5.13339e-14
rs1536271	cg06724236	0.0188553	7.66747	5.31617e-14
rs11159074	cg20938047	-0.0210029	-7.66702	5.33363e-14
rs9743911	cg06724236	0.0188723	7.65983	5.61863e-14
rs2146230	cg06724236	0.0188723	7.65983	5.61863e-14
rs7149535	cg06724236	0.0188723	7.65983	5.61863e-14
rs17248526	cg06724236	0.0188723	7.65983	5.61863e-14
rs73280967	cg06724236	0.0188723	7.65983	5.61863e-14
rs17104188	cg06724236	0.0188723	7.65983	5.61863e-14
rs73282711	cg06724236	0.0188568	7.64638	6.19205e-14
rs10151464	cg06724236	0.0188568	7.64638	6.19205e-14
rs10140817	cg06724236	0.0188568	7.64638	6.19205e-14
rs7159521	cg04348689	0.0306871	7.64602	6.20805e-14
rs61991746	cg04348689	0.0306871	7.64602	6.20805e-14
rs4905062	cg04348689	0.0306871	7.64602	6.20805e-14
rs8014875	cg04348689	0.0306871	7.64602	6.20805e-14
rs6575325	cg04348689	0.0306871	7.64602	6.20805e-14
rs6575326	cg04348689	0.0306871	7.64602	6.20805e-14
rs10144401	cg06724236	0.0187567	7.64602	6.20809e-14
rs3784085	cg06724236	0.0184344	7.64436	6.283e-14
rs10135727	cg06724236	0.0188213	7.64409	6.29523e-14
rs17104224	cg06724236	0.0185792	7.64234	6.37516e-14
rs8008443	cg06724236	0.0186575	7.63515	6.71486e-14
rs12886379	cg26081786	0.0209979	7.62735	7.10322e-14
rs58809332	cg06724236	0.0187976	7.62565	7.19097e-14
rs111917273	cg06724236	0.0187976	7.62565	7.19097e-14
rs183818283	cg06724236	0.0187976	7.62565	7.19097e-14
rs3784081	cg06724236	0.0187925	7.62327	7.3152e-14
rs73282706	cg06724236	0.0187925	7.62327	7.3152e-14
rs10145586	cg06724236	0.018699	7.6163	7.69175e-14
rs1073606	cg06724236	0.018699	7.6163	7.69175e-14
rs12323793	cg06724236	0.018699	7.6163	7.69175e-14
rs12323494	cg06724236	0.018699	7.6163	7.69175e-14
rs10459529	cg06724236	0.018699	7.6163	7.69175e-14
rs10459530	cg06724236	0.018699	7.6163	7.69175e-14
rs10459453	cg06724236	0.018699	7.6163	7.69175e-14
rs57266997	cg06724236	0.018699	7.6163	7.69175e-14
rs7152903	cg06724236	0.018699	7.6163	7.69175e-14
rs1475128	cg06724236	0.0189096	7.61609	7.70344e-14
rs10138824	cg06724236	0.0189096	7.61609	7.70344e-14
rs17248616	cg06724236	0.0189096	7.61609	7.70344e-14
rs10138755	cg06724236	0.0189096	7.61609	7.70344e-14
rs112272757	cg04348689	-0.0358833	-7.61086	7.99878e-14
rs72708601	cg04348689	-0.0358833	-7.61086	7.99878e-14
rs111452615	cg04348689	-0.0358833	-7.61086	7.99878e-14
rs80232110	cg06724236	0.0187479	7.60938	8.08468e-14
rs75487201	cg26277454	0.0582105	23.434	5.17177e-92
rs75773646	cg26277454	0.0582105	23.434	5.17177e-92
rs57880396	cg26277454	0.0561615	22.7818	3.79444e-88
rs78769997	cg26277454	0.0560291	22.7212	8.65575e-88
rs75580066	cg26277454	0.0563295	22.6221	3.33274e-87
rs143800868	cg26277454	0.0541386	21.7921	2.53797e-82
rs74570780	cg26277454	0.0534222	21.7493	4.52114e-82
rs141998787	cg26277454	0.0534222	21.7493	4.52114e-82
rs116491117	cg26277454	0.0534688	21.6008	3.3436e-81
rs9806313	cg26277454	0.0535775	21.5927	3.72759e-81
rs9806161	cg26277454	0.0535744	21.5758	4.67941e-81
rs147870890	cg26277454	0.052654	21.5505	6.57445e-81
rs112419923	cg26277454	0.0529698	21.5127	1.09313e-80
rs7164041	cg26277454	0.052656	21.4033	4.75747e-80
rs113476707	cg26277454	0.0535863	21.3962	5.22775e-80
rs16957187	cg26277454	0.045242	18.162	1.38081e-61
rs10220875	cg26277454	0.0428709	17.2256	1.84488e-56
rs144679664	cg26277454	0.0432292	16.6583	2.05761e-53
rs58506324	cg26277454	0.0432292	16.6583	2.05761e-53
rs11070381	cg26277454	0.0432292	16.6583	2.05761e-53
rs75545308	cg26277454	0.0431724	16.6169	3.42176e-53
rs77771780	cg26277454	0.0431724	16.6169	3.42176e-53
rs8039438	cg26277454	0.0430401	16.5625	6.66259e-53
rs79507973	cg26277454	0.0464174	16.5393	8.84411e-53
rs75925428	cg26277454	0.0464174	16.5393	8.84411e-53
rs16957499	cg26277454	0.0464174	16.5393	8.84411e-53
rs77640130	cg26277454	0.0464174	16.5393	8.84411e-53
rs145749671	cg26277454	0.0464174	16.5393	8.84411e-53
rs141376129	cg26277454	0.0464174	16.5393	8.84411e-53
rs141511730	cg26277454	0.0464174	16.5393	8.84411e-53
rs150332829	cg26277454	0.0464174	16.5393	8.84411e-53
rs114565389	cg26277454	0.0464174	16.5393	8.84411e-53
rs191566711	cg26277454	0.0464174	16.5393	8.84411e-53
rs78088132	cg26277454	0.0464174	16.5393	8.84411e-53
rs7162620	cg26277454	0.0464174	16.5393	8.84411e-53
rs74712577	cg26277454	0.0464174	16.5393	8.84411e-53
rs77760277	cg26277454	0.0464174	16.5393	8.84411e-53
rs77084925	cg26277454	0.0464174	16.5393	8.84411e-53
rs16957507	cg26277454	0.0464174	16.5393	8.84411e-53
rs74841390	cg26277454	0.0464174	16.5393	8.84411e-53
rs74477607	cg26277454	0.0427163	16.5336	9.4896e-53
rs60789298	cg26277454	0.0427163	16.5336	9.4896e-53
rs10220713	cg26277454	0.0427163	16.5336	9.4896e-53
rs8032994	cg26277454	0.0430791	16.5326	9.60375e-53
rs60832391	cg26277454	0.0430791	16.5326	9.60375e-53
rs60881935	cg26277454	0.0430379	16.5071	1.31255e-52
rs2054388	cg26277454	0.0529317	16.5049	1.34828e-52
rs7177501	cg26277454	0.0427372	16.4988	1.45212e-52
rs61343376	cg26277454	0.0462557	16.4403	2.96543e-52
rs10220718	cg26277454	0.0425276	16.4384	3.03528e-52
rs8035881	cg26277454	0.0461741	16.4349	3.16832e-52
rs10438267	cg26277454	0.0461741	16.4349	3.16832e-52
rs144375945	cg26277454	0.0461741	16.4349	3.16832e-52
rs79954084	cg26277454	0.0461741	16.4349	3.16832e-52
rs8039342	cg26277454	0.0461741	16.4349	3.16832e-52
rs59276064	cg26277454	0.0504853	16.2797	2.09555e-51
rs76808379	cg26277454	0.0461424	16.2753	2.21126e-51
rs8031111	cg26277454	0.0471328	16.0612	2.95112e-50
rs7176183	cg26277454	0.0467867	16.0425	3.69858e-50
rs149829132	cg26277454	0.0468011	15.9343	1.35951e-49
rs138598103	cg26277454	0.0462335	15.752	1.20896e-48
rs77483109	cg26277454	0.0431301	15.5299	1.70198e-47
rs79409111	cg26277454	0.0418165	15.3777	1.02963e-46
rs8030850	cg26277454	0.0487732	14.9419	1.69794e-44
rs144183235	cg26277454	0.0484148	14.8231	6.74076e-44
rs138693239	cg26277454	0.0486148	14.8073	8.08672e-44
rs188164060	cg26277454	0.0483704	14.7993	8.87529e-44
rs146112868	cg26277454	0.0483704	14.7993	8.87529e-44
rs16957224	cg26277454	0.0401772	14.7062	2.59984e-43
rs28444219	cg26277454	0.0488139	14.6936	3.00468e-43
chr15:43463832	cg26277454	0.0464822	14.6577	4.54455e-43
rs7162971	cg26277454	0.048543	14.6503	4.94566e-43
rs2271964	cg26277454	0.048543	14.6503	4.94566e-43
rs60481556	cg26277454	0.048543	14.6503	4.94566e-43
rs1042168	cg26277454	0.048543	14.6503	4.94566e-43
rs78899565	cg26277454	0.048543	14.6503	4.94566e-43
rs143442482	cg26277454	0.048543	14.6503	4.94566e-43
rs116518126m	cg26277454	0.048543	14.6503	4.94566e-43
rs116390315	cg26277454	0.048543	14.6503	4.94566e-43
rs7171797	cg26277454	0.048543	14.6503	4.94566e-43
rs78850399	cg26277454	0.048543	14.6503	4.94566e-43
rs79338229	cg26277454	0.048543	14.6503	4.94566e-43
rs16957502	cg26277454	0.048543	14.6503	4.94566e-43
rs34222269	cg26277454	0.048543	14.6503	4.94566e-43
rs77090230	cg26277454	0.048387	14.5876	1.01667e-42
rs1474199	cg26277454	0.0482875	14.5324	1.91289e-42
rs116738094	cg26277454	0.0483321	14.3613	1.34769e-41
rs34436896	cg26277454	0.0416729	14.1755	1.106e-40
rs61268760	cg26277454	0.0448517	14.1253	1.94799e-40
rs114344855	cg26277454	0.0451408	14.1216	2.03164e-40
rs111530374	cg26277454	0.04513	13.9511	1.3778e-39
rs57287824	cg26277454	0.04513	13.9511	1.3778e-39
rs76266894	cg26277454	0.0440993	13.9133	2.10024e-39
rs11504666	cg26277454	0.0440993	13.9133	2.10024e-39
rs143892435	cg26277454	0.0444724	13.8104	6.61492e-39
[truncated: 7,589 more rows]

## Sheet: CD-CpGs in Replication FDR
The blood cis-mQTLs detected for 977 CD associated CpGs from Somineni et al. 2019 in discovery cohort at FDR level
SNP	CpGs	beta	t-stat	p-value	FDR
rs571126	cg19070398	-0.0904622	-17.9403	2.41925e-45	1.24549e-39
rs805883	cg19070398	-0.0904063	-17.9358	2.50121e-45	1.24549e-39
rs10769150	cg03700417	-0.127576	-16.3735	2.94749e-40	9.78482e-35
rs570393;rs796963361;rs59562890	cg19070398	0.077771	14.3817	9.83466e-34	2.44862e-28
rs1873057	cg03700417	-0.123568	-14.2389	2.88761e-33	5.75162e-28
rs608938	cg19070398	0.0773825	14.1382	6.17161e-33	1.0244e-27
rs6125883	cg00568296	-0.0833797	-14.0646	1.07471e-32	1.52903e-27
rs34219567	cg10065189	-0.0570005	-13.1551	1.0014e-29	9.97304e-25
rs56245572	cg10065189	-0.0570005	-13.1551	1.0014e-29	9.97304e-25
rs1109279	cg10065189	-0.0570005	-13.1551	1.0014e-29	9.97304e-25
rs2769355	cg20406979	0.0635694	12.2073	1.17023e-26	3.3532e-22
rs2757054	cg20406979	0.0635694	12.2073	1.17023e-26	3.3532e-22
rs443570	cg20406979	0.0625007	12.0938	2.71021e-26	3.3532e-22
rs366938	cg20406979	0.0624389	12.0829	2.93726e-26	3.3532e-22
rs1811121	cg20406979	0.0624389	12.0829	2.93726e-26	3.3532e-22
rs394522	cg20406979	0.062437	12.0813	2.97294e-26	3.3532e-22
rs10946199	cg20406979	0.062428	12.0791	3.02183e-26	3.3532e-22
rs1819333	cg20406979	0.0624235	12.0772	3.06394e-26	3.3532e-22
rs2013815	cg20406979	0.0624235	12.0772	3.06394e-26	3.3532e-22
rs2769349	cg20406979	0.0624235	12.0772	3.06394e-26	3.3532e-22
rs1187530	cg20406979	0.0624235	12.0772	3.06394e-26	3.3532e-22
rs2757050	cg20406979	0.0624235	12.0772	3.06394e-26	3.3532e-22
rs1590257	cg20406979	0.0624235	12.0772	3.06394e-26	3.3532e-22
rs2769351	cg20406979	0.0624235	12.0772	3.06394e-26	3.3532e-22
rs6939196	cg20406979	0.0624235	12.0772	3.06394e-26	3.3532e-22
rs2769354	cg20406979	0.0624235	12.0772	3.06394e-26	3.3532e-22
rs2757052	cg20406979	0.0624235	12.0772	3.06394e-26	3.3532e-22
rs1211447	cg20406979	0.0624235	12.0772	3.06394e-26	3.3532e-22
rs1187532	cg20406979	0.0624235	12.0772	3.06394e-26	3.3532e-22
rs434093	cg20406979	0.0624235	12.0772	3.06394e-26	3.3532e-22
rs448060	cg20406979	0.0624235	12.0772	3.06394e-26	3.3532e-22
rs365189	cg20406979	0.0624235	12.0772	3.06394e-26	3.3532e-22
rs376551	cg20406979	0.0624235	12.0772	3.06394e-26	3.3532e-22
rs386548	cg20406979	0.0624235	12.0772	3.06394e-26	3.3532e-22
rs402749	cg20406979	0.0624235	12.0772	3.06394e-26	3.3532e-22
rs385863	cg20406979	0.0624235	12.0772	3.06394e-26	3.3532e-22
rs397713	cg20406979	0.0624235	12.0772	3.06394e-26	3.3532e-22
rs453184	cg20406979	0.0624235	12.0772	3.06394e-26	3.3532e-22
rs436707	cg20406979	0.0624235	12.0772	3.06394e-26	3.3532e-22
rs442298	cg20406979	0.0624235	12.0772	3.06394e-26	3.3532e-22
rs377753	cg20406979	0.0624235	12.0772	3.06394e-26	3.3532e-22
rs430477	cg20406979	0.0624235	12.0772	3.06394e-26	3.3532e-22
rs376574	cg20406979	0.0624235	12.0772	3.06394e-26	3.3532e-22
rs439237	cg20406979	0.0624235	12.0772	3.06394e-26	3.3532e-22
rs9457247	cg20406979	0.0624235	12.0772	3.06394e-26	3.3532e-22
rs9459827	cg20406979	0.0624235	12.0772	3.06394e-26	3.3532e-22
rs1794699	cg20406979	0.0624235	12.0772	3.06394e-26	3.3532e-22
rs1743439	cg20406979	0.0624235	12.0772	3.06394e-26	3.3532e-22
rs13192426	cg20406979	0.0624235	12.0772	3.06394e-26	3.3532e-22
rs13192687	cg20406979	0.0624235	12.0772	3.06394e-26	3.3532e-22
rs9717548	cg20406979	0.0624235	12.0772	3.06394e-26	3.3532e-22
rs5020533	cg20406979	0.0624235	12.0772	3.06394e-26	3.3532e-22
rs1620933	cg20406979	0.0624235	12.0772	3.06394e-26	3.3532e-22
rs415987	cg20406979	0.0624235	12.0772	3.06394e-26	3.3532e-22
rs1794697	cg20406979	0.0624235	12.0772	3.06394e-26	3.3532e-22
rs34560498;rs386708543	cg20406979	0.0624235	12.0772	3.06394e-26	3.3532e-22
rs414437	cg20406979	0.0624235	12.0772	3.06394e-26	3.3532e-22
rs421214	cg20406979	0.0624235	12.0772	3.06394e-26	3.3532e-22
rs422094	cg20406979	0.0624235	12.0772	3.06394e-26	3.3532e-22
rs393558	cg20406979	0.0624235	12.0772	3.06394e-26	3.3532e-22
rs436625	cg20406979	0.0624235	12.0772	3.06394e-26	3.3532e-22
rs408040	cg20406979	0.0624235	12.0772	3.06394e-26	3.3532e-22
rs408918	cg20406979	0.0624235	12.0772	3.06394e-26	3.3532e-22
rs413232	cg20406979	0.0624235	12.0772	3.06394e-26	3.3532e-22
rs86755	cg20406979	0.0624235	12.0772	3.06394e-26	3.3532e-22
rs382009	cg20406979	0.0624235	12.0772	3.06394e-26	3.3532e-22
rs428805	cg20406979	0.0624235	12.0772	3.06394e-26	3.3532e-22
rs2345571	cg20406979	0.0624235	12.0772	3.06394e-26	3.3532e-22
rs385460	cg20406979	0.0624235	12.0772	3.06394e-26	3.3532e-22
rs385113	cg20406979	0.0624235	12.0772	3.06394e-26	3.3532e-22
rs932644	cg20406979	0.0624235	12.0772	3.06394e-26	3.3532e-22
rs10946198	cg20406979	0.0624235	12.0772	3.06394e-26	3.3532e-22
rs1743440	cg20406979	0.0624235	12.0772	3.06394e-26	3.3532e-22
rs1743441	cg20406979	0.0624235	12.0772	3.06394e-26	3.3532e-22
rs1794694	cg20406979	0.0624235	12.0772	3.06394e-26	3.3532e-22
rs430293	cg20406979	0.0624235	12.0772	3.06394e-26	3.3532e-22
rs430097	cg20406979	0.0624235	12.0772	3.06394e-26	3.3532e-22
rs409356	cg20406979	0.0624235	12.0772	3.06394e-26	3.3532e-22
rs447042	cg20406979	0.0624235	12.0772	3.06394e-26	3.3532e-22
rs402191	cg20406979	0.0624235	12.0772	3.06394e-26	3.3532e-22
rs1794693	cg20406979	0.0624235	12.0772	3.06394e-26	3.3532e-22
rs401260	cg20406979	0.0624235	12.0772	3.06394e-26	3.3532e-22
rs422694	cg20406979	0.0624235	12.0772	3.06394e-26	3.3532e-22
rs422780	cg20406979	0.0624235	12.0772	3.06394e-26	3.3532e-22
rs400176	cg20406979	0.0624235	12.0772	3.06394e-26	3.3532e-22
rs422562	cg20406979	0.0624235	12.0772	3.06394e-26	3.3532e-22
rs416131	cg20406979	0.0624235	12.0772	3.06394e-26	3.3532e-22
rs415890	cg20406979	0.0624235	12.0772	3.06394e-26	3.3532e-22
rs415842	cg20406979	0.0624235	12.0772	3.06394e-26	3.3532e-22
rs389956	cg20406979	0.0624235	12.0772	3.06394e-26	3.3532e-22
rs389946	cg20406979	0.0624235	12.0772	3.06394e-26	3.3532e-22
rs401261	cg20406979	0.0624088	12.0709	3.21036e-26	3.47526e-22
rs2793381	cg02280892	0.102721	12.0509	3.72075e-26	3.98445e-22
rs2015864	cg20406979	0.062365	12.0349	4.18907e-26	4.43825e-22
rs1811123	cg20406979	0.0622166	11.9504	7.81283e-26	8.19042e-22
rs364283	cg20406979	0.0621701	11.921	9.70039e-26	9.95953e-22
rs429083	cg20406979	0.0621701	11.921	9.70039e-26	9.95953e-22
rs4710147	cg20406979	0.0620979	11.9	1.13273e-25	1.1281e-21
rs2757046	cg20406979	0.0620979	11.9	1.13273e-25	1.1281e-21
rs2757047	cg20406979	0.0620979	11.9	1.13273e-25	1.1281e-21
rs393727	cg20406979	0.0615697	11.8943	1.18095e-25	1.16448e-21
rs405553	cg20406979	0.0620879	11.8393	1.77023e-25	1.72843e-21
rs2345573	cg20406979	0.0612744	11.6064	9.79176e-25	9.46771e-21
rs407515	cg20406979	0.0614338	11.5931	1.07932e-24	9.51243e-21
rs406095	cg20406979	0.0614338	11.5931	1.07932e-24	9.51243e-21
rs4710160	cg20406979	0.0614338	11.5931	1.07932e-24	9.51243e-21
rs4710161	cg20406979	0.0614338	11.5931	1.07932e-24	9.51243e-21
rs388406	cg20406979	0.0614338	11.5931	1.07932e-24	9.51243e-21
rs430145	cg20406979	0.0614338	11.5931	1.07932e-24	9.51243e-21
rs425039	cg20406979	0.0614338	11.5931	1.07932e-24	9.51243e-21
rs376097	cg20406979	0.0614338	11.5931	1.07932e-24	9.51243e-21
rs424185	cg20406979	0.0614338	11.5931	1.07932e-24	9.51243e-21
rs400837	cg20406979	0.0614338	11.5931	1.07932e-24	9.51243e-21
rs4997107	cg20406979	0.0613158	11.5553	1.42325e-24	1.24337e-20
rs2249731	cg02280892	0.0988811	11.5484	1.49686e-24	1.29217e-20
rs439553	cg20406979	-0.060565	-11.5459	1.52393e-24	1.29217e-20
rs2149083	cg20406979	0.0605481	11.5374	1.62184e-24	1.29217e-20
rs2149084	cg20406979	0.0605481	11.5374	1.62184e-24	1.29217e-20
rs2769346	cg20406979	0.0605481	11.5374	1.62184e-24	1.29217e-20
rs2149085	cg20406979	0.0605481	11.5374	1.62184e-24	1.29217e-20
rs2769347	cg20406979	0.0605481	11.5374	1.62184e-24	1.29217e-20
rs2769348	cg20406979	0.0605481	11.5374	1.62184e-24	1.29217e-20
rs2149090	cg20406979	0.0605481	11.5374	1.62184e-24	1.29217e-20
rs2149091	cg20406979	0.0605481	11.5374	1.62184e-24	1.29217e-20
rs2149092	cg20406979	0.0605481	11.5374	1.62184e-24	1.29217e-20
rs444210	cg20406979	-0.0605451	-11.4686	2.68275e-24	2.12046e-20
rs400063	cg20406979	-0.0600296	-11.419	3.85201e-24	2.99708e-20
rs1794700	cg20406979	-0.0600296	-11.419	3.85201e-24	2.99708e-20
rs1317170	cg02280892	0.0983995	11.4103	4.10555e-24	3.14521e-20
rs2570367	cg02280892	0.0983995	11.4103	4.10555e-24	3.14521e-20
rs2757044	cg20406979	0.0601524	11.344	6.65558e-24	5.05983e-20
rs433191	cg20406979	0.0612847	11.2522	1.29734e-23	9.78818e-20
rs408087	cg20406979	-0.0590758	-11.1823	2.15521e-23	1.61384e-19
rs387733	cg20406979	0.0600462	11.123	3.31464e-23	2.4635e-19
rs9900933	cg23470227	-0.0524652	-11.0777	4.6008e-23	3.39407e-19
rs9903858	cg23470227	-0.0520063	-11.0227	6.84483e-23	5.01239e-19
rs1047743	cg23470227	-0.0518951	-11.0042	7.82399e-23	5.6876e-19
rs8069105	cg23470227	-0.052219	-10.977	9.52275e-23	6.87234e-19
rs377232	cg20406979	-0.0592444	-10.7959	3.50935e-22	2.51439e-18
rs6091092	cg00568296	-0.0940979	-10.7432	5.11967e-22	3.64196e-18
rs56785718	cg27569037	0.0673238	10.7212	5.998e-22	4.20668e-18
rs7656235	cg27569037	0.0673238	10.7212	5.998e-22	4.20668e-18
rs1076714	cg00568296	-0.0735	-10.6947	7.2482e-22	5.04796e-18
rs4662721	cg09152259	0.0555466	10.6484	1.00999e-21	6.98515e-18
rs4662724	cg09152259	0.0551886	10.5805	1.63975e-21	1.12624e-17
rs12613413	cg09152259	0.0549059	10.5605	1.89239e-21	1.29086e-17
rs1044059	cg20406979	0.0580909	10.5357	2.25782e-21	1.52966e-17
rs2276683	cg09152259	0.0552269	10.522	2.48853e-21	1.67457e-17
rs2276682	cg09152259	0.0549432	10.4996	2.92079e-21	1.95225e-17
rs10769151	cg03700417	-0.106868	-10.484	3.26264e-21	2.1662e-17
rs4485425	cg23470227	-0.0504782	-10.451	4.12569e-21	2.72108e-17
rs10928764	cg09152259	0.0548745	10.4234	5.02172e-21	3.26876e-17
rs2090573	cg09152259	0.0548745	10.4234	5.02172e-21	3.26876e-17
rs6430937	cg09152259	0.053881	10.3983	6.00117e-21	3.88094e-17
rs7225724	cg15815084	0.0982866	10.3653	7.58205e-21	4.80959e-17
rs6503775	cg15815084	0.0982866	10.3653	7.58205e-21	4.80959e-17
rs4365350	cg15815084	0.0982866	10.3653	7.58205e-21	4.80959e-17
rs2757042	cg20406979	0.0577665	10.3435	8.84947e-21	5.51561e-17
rs11652539	cg23470227	-0.049363	-10.3433	8.86119e-21	5.51561e-17
rs11652261	cg23470227	-0.049363	-10.3433	8.86119e-21	5.51561e-17
rs73352129	cg23470227	-0.0501652	-10.3289	9.81197e-21	5.92234e-17
rs67740167	cg23470227	-0.0501652	-10.3289	9.81197e-21	5.92234e-17
rs78057960	cg23470227	-0.0501652	-10.3289	9.81197e-21	5.92234e-17
rs8076052	cg23470227	-0.0501652	-10.3289	9.81197e-21	5.92234e-17
rs2125345;rs558180280	cg23470227	-0.0501652	-10.3289	9.81197e-21	5.92234e-17
rs13429925	cg09152259	0.0532386	10.3048	1.16335e-20	6.9795e-17
rs878371	cg23470227	-0.0484088	-10.2891	1.30068e-20	7.75665e-17
rs11658385	cg23470227	-0.0486158	-10.2816	1.37109e-20	8.12789e-17
rs8071825	cg15815084	0.100319	10.2531	1.67712e-20	9.82512e-17
rs9892183	cg15815084	0.100319	10.2531	1.67712e-20	9.82512e-17
rs7584659	cg09152259	0.0561605	10.2501	1.71345e-20	9.97924e-17
rs59027829	cg09152259	0.0534009	10.2463	1.75933e-20	1.01869e-16
rs364451	cg20406979	0.0575416	10.2362	1.88919e-20	1.08755e-16
rs398278	cg20406979	0.0581175	10.2334	1.9267e-20	1.101e-16
rs28578956	cg23470227	-0.0481633	-10.2329	1.93465e-20	1.101e-16
rs6095747	cg00568296	-0.093421	-10.2268	2.0196e-20	1.14281e-16
rs2238645	cg02370334	-0.0548139	-10.1987	2.4616e-20	1.38505e-16
rs239935	cg20406979	0.0577935	10.1903	2.61216e-20	1.46151e-16
rs1322077	cg20406979	0.055808	10.1591	3.25399e-20	1.81044e-16
rs1135688	cg23470227	-0.0479936	-10.1456	3.57905e-20	1.98023e-16
rs2149093	cg20406979	0.0573635	10.1328	3.91487e-20	2.1075e-16
rs444988	cg20406979	0.0573635	10.1328	3.91487e-20	2.1075e-16
rs408080	cg20406979	0.0573635	10.1328	3.91487e-20	2.1075e-16
rs1794696	cg20406979	0.0573635	10.1328	3.91487e-20	2.1075e-16
rs404222	cg20406979	0.0573635	10.1328	3.91487e-20	2.1075e-16
rs9457249	cg20406979	0.0557034	10.1301	3.99105e-20	2.12553e-16
rs9457251	cg20406979	0.0557034	10.1301	3.99105e-20	2.12553e-16
rs4789229	cg23470227	-0.048324	-10.104	4.79428e-20	2.53973e-16
rs9348211	cg20406979	0.0572246	10.0991	4.96217e-20	2.56057e-16
rs6920364	cg20406979	0.0572246	10.0991	4.96217e-20	2.56057e-16
rs2769352	cg20406979	0.0572246	10.0991	4.96217e-20	2.56057e-16
rs1811120	cg20406979	0.0572246	10.0991	4.96217e-20	2.56057e-16
rs427824	cg20406979	0.0572246	10.0991	4.96217e-20	2.56057e-16
rs9717862	cg20406979	0.0571362	10.0777	5.76486e-20	2.95943e-16
rs6091091	cg00568296	-0.0932868	-10.0604	6.50948e-20	3.24759e-16
rs4300780	cg09152259	0.055137	10.0595	6.55444e-20	3.24759e-16
rs12613252	cg09152259	0.055137	10.0595	6.55444e-20	3.24759e-16
rs12613254	cg09152259	0.055137	10.0595	6.55444e-20	3.24759e-16
rs13414676	cg09152259	0.055137	10.0595	6.55444e-20	3.24759e-16
rs13390029	cg09152259	0.055137	10.0595	6.55444e-20	3.24759e-16
rs13409933	cg09152259	0.055137	10.0595	6.55444e-20	3.24759e-16
rs239934	cg20406979	0.0572681	10.0488	7.0653e-20	3.48338e-16
rs55636440	cg23470227	-0.0476211	-10.0186	8.72949e-20	4.28266e-16
rs28807127	cg09152259	0.0543462	10.0159	8.89355e-20	4.32058e-16
rs13017103	cg09152259	0.0543462	10.0159	8.89355e-20	4.32058e-16
rs10221244	cg23470227	-0.0467354	-10.0121	9.1376e-20	4.41069e-16
rs4346838	cg20406979	0.0571338	10.0109	9.21188e-20	4.41069e-16
rs2345572	cg20406979	0.0571338	10.0109	9.21188e-20	4.41069e-16
rs34006114	cg09152259	0.0563502	9.99238	1.04864e-19	4.99691e-16
rs3212701	cg02370334	-0.0535068	-9.99048	1.06274e-19	5.03997e-16
rs11899601	cg09152259	0.0547449	9.9858	1.09804e-19	5.15827e-16
rs10167294	cg09152259	0.0547449	9.9858	1.09804e-19	5.15827e-16
rs8081539	cg23470227	-0.0473804	-9.98218	1.12622e-19	5.25321e-16
rs4150434	cg09152259	0.0542308	9.98186	1.1288e-19	5.25321e-16
rs12614320	cg09152259	0.054447	9.97834	1.1569e-19	5.35896e-16
rs12600868	cg23470227	-0.0468994	-9.96773	1.24599e-19	5.74492e-16
rs8047999	cg22873414	0.0486311	9.9528	1.38302e-19	6.34732e-16
rs1143407	cg09152259	0.0540785	9.94389	1.47193e-19	6.70699e-16
rs35757209	cg23470227	-0.0471065	-9.9436	1.47486e-19	6.70699e-16
rs4789227	cg23470227	-0.0471496	-9.94115	1.50034e-19	6.71152e-16
rs78742057	cg20859453	-0.175494	-9.94091	1.50281e-19	6.71152e-16
rs73645935	cg20859453	-0.175494	-9.94091	1.50281e-19	6.71152e-16
rs6475024	cg20859453	-0.175494	-9.94091	1.50281e-19	6.71152e-16
rs7218058	cg23470227	-0.0479925	-9.92754	1.64996e-19	7.33577e-16
rs3738948	cg09152259	0.0538688	9.8906	2.1349e-19	9.24424e-16
rs4150514	cg09152259	0.0538688	9.8906	2.1349e-19	9.24424e-16
rs58063879	cg09152259	0.0538688	9.8906	2.1349e-19	9.24424e-16
rs13403918	cg09152259	0.0538688	9.8906	2.1349e-19	9.24424e-16
rs12617858	cg09152259	0.0538688	9.8906	2.1349e-19	9.24424e-16
rs2134794	cg09152259	0.0538688	9.8906	2.1349e-19	9.24424e-16
rs6716392	cg09152259	0.0538922	9.83281	3.19276e-19	1.3765e-15
rs16977599	cg12421287	0.0530158	9.82555	3.35791e-19	1.44146e-15
rs7216615	cg23470227	-0.04737	-9.77992	4.61075e-19	1.96515e-15
rs2061387	cg23470227	-0.0473374	-9.7791	4.63704e-19	1.96515e-15
rs7217432	cg23470227	-0.0473374	-9.7791	4.63704e-19	1.96515e-15
rs7221792	cg23470227	-0.046437	-9.7665	5.06077e-19	2.13563e-15
rs7217536	cg23470227	-0.0471358	-9.76354	5.16562e-19	2.14355e-15
rs7216512	cg23470227	-0.0471358	-9.76354	5.16562e-19	2.14355e-15
rs12602430	cg23470227	-0.0471358	-9.76354	5.16562e-19	2.14355e-15
rs12603812	cg23470227	-0.0471358	-9.76354	5.16562e-19	2.14355e-15
rs2071556	cg09017117	0.0468338	9.76189	5.22518e-19	2.15926e-15
rs2238644	cg02370334	-0.0533736	-9.73796	6.16825e-19	2.53845e-15
rs8051462	cg22873414	0.0476241	9.73471	6.30872e-19	2.58557e-15
rs9459835	cg20406979	0.0535458	9.72153	6.91157e-19	2.82104e-15
rs7223416	cg23470227	-0.0469864	-9.69826	8.11989e-19	3.3007e-15
rs6929466	cg20406979	0.0534966	9.68808	8.71229e-19	3.41602e-15
rs9459840	cg20406979	0.0534966	9.68808	8.71229e-19	3.41602e-15
rs9459841	cg20406979	0.0534966	9.68808	8.71229e-19	3.41602e-15
rs6904946	cg20406979	0.0534966	9.68808	8.71229e-19	3.41602e-15
rs6900701	cg20406979	0.0534966	9.68808	8.71229e-19	3.41602e-15
rs6923582	cg20406979	0.0534966	9.68808	8.71229e-19	3.41602e-15
rs2237276	cg20406979	0.0534966	9.68808	8.71229e-19	3.41602e-15
rs13195812	cg20406979	0.0534966	9.68808	8.71229e-19	3.41602e-15
rs9295385	cg20406979	0.0534966	9.68808	8.71229e-19	3.41602e-15
rs35708549	cg09152259	0.0563946	9.66511	1.02111e-18	3.97242e-15
rs13034157	cg09152259	0.0563946	9.66511	1.02111e-18	3.97242e-15
rs35171809	cg20406979	0.0526644	9.66437	1.02639e-18	3.97742e-15
rs10017705	cg27569037	0.0692586	9.64566	1.168e-18	4.47395e-15
rs4234892	cg27569037	0.0692586	9.64566	1.168e-18	4.47395e-15
rs4690807	cg27569037	0.0692586	9.64566	1.168e-18	4.47395e-15
rs9923	cg09152259	0.0543416	9.62654	1.33272e-18	5.08532e-15
rs11731244	cg27569037	0.0689224	9.59721	1.63141e-18	6.20132e-15
rs6735779	cg09152259	0.0561336	9.5932	1.67712e-18	6.35082e-15
rs8100347	cg02370334	-0.0526214	-9.57402	1.91383e-18	7.21971e-15
rs67771362	cg09152259	0.0557503	9.52941	2.60105e-18	9.77515e-15
rs11684068	cg09152259	0.055065	9.51563	2.85927e-18	1.06651e-14
rs2139142	cg09152259	0.055065	9.51563	2.85927e-18	1.06651e-14
rs34703177	cg09152259	0.0560111	9.48094	3.62759e-18	1.32822e-14
rs34441363	cg09152259	0.0560111	9.48094	3.62759e-18	1.32822e-14
rs6738811	cg09152259	0.0560111	9.48094	3.62759e-18	1.32822e-14
rs6752139	cg09152259	0.0560111	9.48094	3.62759e-18	1.32822e-14
rs147898570	cg09152259	0.0560111	9.48094	3.62759e-18	1.32822e-14
rs7970524	cg27246571	-0.0607522	-9.45766	4.25517e-18	1.5523e-14
rs9894244	cg23470227	-0.0471682	-9.39628	6.47538e-18	2.28286e-14
rs9894291	cg23470227	-0.0471682	-9.39628	6.47538e-18	2.28286e-14
rs12526548	cg20406979	0.0518438	9.39601	6.487e-18	2.28286e-14
rs9459839	cg20406979	0.0518438	9.39601	6.487e-18	2.28286e-14
rs1894603	cg20406979	0.0518438	9.39601	6.487e-18	2.28286e-14
rs9459845	cg20406979	0.0518438	9.39601	6.487e-18	2.28286e-14
rs9457257	cg20406979	0.0518438	9.39601	6.487e-18	2.28286e-14
rs9459846	cg20406979	0.0518438	9.39601	6.487e-18	2.28286e-14
rs6456146	cg20406979	0.0518438	9.39601	6.487e-18	2.28286e-14
rs9295384	cg20406979	0.0518438	9.39601	6.487e-18	2.28286e-14
rs12619391	cg09152259	0.0547199	9.38178	7.14929e-18	2.50707e-14
rs2203894	cg15815084	0.0869283	9.37217	7.63363e-18	2.66752e-14
rs11655389	cg23470227	-0.0451792	-9.364	8.07149e-18	2.81067e-14
rs4150506	cg09152259	0.0556775	9.36176	8.19551e-18	2.84391e-14
rs58875777	cg27569037	0.0599141	9.35051	8.84912e-18	3.06005e-14
rs239933	cg20406979	0.0519083	9.34572	9.14264e-18	3.15061e-14
rs3744006	cg23470227	-0.0471945	-9.34496	9.19009e-18	3.15605e-14
rs9459842	cg20406979	0.0515718	9.34073	9.45932e-18	3.16129e-14
rs7749278	cg20406979	0.0515718	9.34073	9.45932e-18	3.16129e-14
rs2282861	cg20406979	0.0515718	9.34073	9.45932e-18	3.16129e-14
rs2282860	cg20406979	0.0515718	9.34073	9.45932e-18	3.16129e-14
rs2181059	cg20406979	0.0515718	9.34073	9.45932e-18	3.16129e-14
rs2237277	cg20406979	0.0515718	9.34073	9.45932e-18	3.16129e-14
rs9457258	cg20406979	0.0515718	9.34073	9.45932e-18	3.16129e-14
rs10946205	cg20406979	0.0515718	9.34073	9.45932e-18	3.16129e-14
rs28836897	cg27569037	0.0685744	9.3248	1.05436e-17	3.47698e-14
rs28875870	cg27569037	0.0685744	9.3248	1.05436e-17	3.47698e-14
rs4588419	cg27569037	0.0685744	9.3248	1.05436e-17	3.47698e-14
rs4690808	cg27569037	0.0685744	9.3248	1.05436e-17	3.47698e-14
rs6456143	cg20406979	0.051508	9.32112	1.08109e-17	3.55336e-14
rs2237273	cg20406979	0.051638	9.2884	1.35056e-17	4.42447e-14
rs34601617	cg09152259	0.0538294	9.28772	1.35689e-17	4.43063e-14
rs9897048	cg23470227	-0.0465187	-9.26331	1.60161e-17	5.21262e-14
rs935471	cg11878712	0.051702	9.25837	1.65618e-17	5.37267e-14
rs35103294	cg23470227	-0.043009	-9.2507	1.74467e-17	5.64137e-14
rs8074963	cg23470227	-0.0464724	-9.24248	1.84478e-17	5.94578e-14
rs903202	cg22873414	0.0462268	9.23892	1.88983e-17	6.07132e-14
rs4789155	cg02433148	0.0392409	9.23388	1.95566e-17	6.26258e-14
rs1979215	cg23470227	-0.0450726	-9.23303	1.96688e-17	6.27835e-14
rs6503769	cg15815084	0.0864555	9.227	2.04892e-17	6.49856e-14
rs12600529	cg15815084	0.0864555	9.227	2.04892e-17	6.49856e-14
rs62353271	cg27569037	0.0701429	9.22553	2.06952e-17	6.54306e-14
rs8067076	cg23470227	-0.0464001	-9.22442	2.08514e-17	6.57157e-14
rs2237275	cg20406979	0.0517567	9.22114	2.13193e-17	6.67678e-14
rs2237274	cg20406979	0.0517567	9.22114	2.13193e-17	6.67678e-14
rs6747862	cg09152259	0.0538759	9.19653	2.51868e-17	7.86329e-14
rs4150492	cg09152259	0.0542096	9.18037	2.80974e-17	8.74456e-14
rs9906591	cg12582317	0.0545442	9.1649	3.11945e-17	9.64812e-14
rs886925	cg12582317	0.0545442	9.1649	3.11945e-17	9.64812e-14
rs1970872	cg15815084	0.0872234	9.15687	3.29347e-17	1.01235e-13
rs3867602	cg15815084	0.0872234	9.15687	3.29347e-17	1.01235e-13
rs2301436	cg20406979	0.0507408	9.15553	3.32332e-17	1.01838e-13
rs6503768	cg15815084	0.0853424	9.11768	4.29084e-17	1.31083e-13
rs3791268	cg11878712	0.0521864	9.05918	6.36218e-17	1.93767e-13
rs10484531	cg20406979	0.0519242	9.0565	6.47811e-17	1.96489e-13
rs386793608;rs1519976	cg22873414	0.045239	9.05575	6.51074e-17	1.96489e-13
rs768410	cg22873414	0.045239	9.05575	6.51074e-17	1.96489e-13
rs3791264	cg11878712	0.0519626	9.00821	8.95953e-17	2.63992e-13
rs11695371	cg11878712	0.0519626	9.00821	8.95953e-17	2.63992e-13
rs11676854	cg11878712	0.0519626	9.00821	8.95953e-17	2.63992e-13
rs7576554	cg11878712	0.0519626	9.00821	8.95953e-17	2.63992e-13
rs7593036	cg11878712	0.0519626	9.00821	8.95953e-17	2.63992e-13
rs6757621	cg11878712	0.0519626	9.00821	8.95953e-17	2.63992e-13
rs57223057	cg11878712	0.0519626	9.00821	8.95953e-17	2.63992e-13
rs7596803	cg11878712	0.0519626	9.00821	8.95953e-17	2.63992e-13
rs10946203	cg20406979	0.0522443	8.9913	1.00352e-16	2.94813e-13
rs2540499	cg27246571	-0.0582456	-8.98119	1.07384e-16	3.13622e-13
rs2540498	cg27246571	-0.0582456	-8.98119	1.07384e-16	3.13622e-13
rs376571402	cg20406979	0.0510448	8.97895	1.09002e-16	3.17417e-13
rs55913048	cg02893324	-0.0602146	-8.97671	1.10654e-16	3.21287e-13
rs9459836	cg20406979	0.0523495	8.97185	1.14311e-16	3.30942e-13
rs386708545;rs200447952;rs79452434	cg20406979	0.0510093	8.97044	1.15397e-16	3.33117e-13
rs199612119;rs147968	cg22873414	0.0462382	8.96961	1.16038e-16	3.34e-13
rs12212247	cg20406979	0.0524601	8.96282	1.21433e-16	3.4852e-13
rs6428525	cg23747839	-0.0632474	-8.9501	1.32225e-16	3.78405e-13
rs12477214	cg09152259	0.0456257	8.94047	1.41019e-16	4.02415e-13
rs9457254	cg20406979	0.0518501	8.93507	1.46198e-16	4.13638e-13
rs2237272	cg20406979	0.0518501	8.93507	1.46198e-16	4.13638e-13
rs10455982	cg20406979	0.0518501	8.93507	1.46198e-16	4.13638e-13
rs1850689	cg09152259	0.0455593	8.91886	1.62915e-16	4.5963e-13
rs71373396	cg15815084	0.0838019	8.90112	1.83401e-16	5.15965e-13
rs9459838	cg20406979	0.0516957	8.89862	1.86485e-16	5.23164e-13
rs13008440	cg09152259	0.0523477	8.89677	1.88796e-16	5.28159e-13
rs56151459	cg02893324	-0.0596288	-8.8908	1.96461e-16	5.46531e-13
rs13032010	cg02893324	-0.0596288	-8.8908	1.96461e-16	5.46531e-13
rs9457256	cg20406979	0.0516002	8.89027	1.97162e-16	5.46954e-13
rs1990231	cg12582317	0.0527883	8.88573	2.0321e-16	5.5295e-13
rs9910446	cg12582317	0.0527883	8.88573	2.0321e-16	5.5295e-13
rs12451748	cg12582317	0.0527883	8.88573	2.0321e-16	5.5295e-13
rs12451753	cg12582317	0.0527883	8.88573	2.0321e-16	5.5295e-13
rs12449409	cg12582317	0.0527883	8.88573	2.0321e-16	5.5295e-13
rs7220397	cg12582317	0.0527883	8.88573	2.0321e-16	5.5295e-13
rs8081251	cg12582317	0.0527883	8.88573	2.0321e-16	5.5295e-13
rs1060404	cg20406979	0.051431	8.85049	2.56973e-16	6.8612e-13
rs4710171	cg20406979	0.051431	8.85049	2.56973e-16	6.8612e-13
rs9457252	cg20406979	0.051431	8.85049	2.56973e-16	6.8612e-13
rs3752520	cg20406979	0.051431	8.85049	2.56973e-16	6.8612e-13
rs9459849	cg20406979	0.051431	8.85049	2.56973e-16	6.8612e-13
rs9457259	cg20406979	0.051431	8.85049	2.56973e-16	6.8612e-13
rs10946204	cg20406979	0.051431	8.85049	2.56973e-16	6.8612e-13
rs2332966	cg12582317	0.0525344	8.84237	2.71233e-16	7.22257e-13
rs55894868	cg02893324	-0.0595623	-8.79738	3.65702e-16	9.71219e-13
rs12990553	cg02893324	-0.0593394	-8.7053	6.72698e-16	1.77705e-12
rs3769161	cg02893324	-0.0593394	-8.7053	6.72698e-16	1.77705e-12
rs56084435	cg02893324	-0.0591594	-8.70219	6.86681e-16	1.79967e-12
rs375004057	cg02893324	-0.0591594	-8.70219	6.86681e-16	1.79967e-12
rs377400560	cg02893324	-0.0591594	-8.70219	6.86681e-16	1.79967e-12
rs2742417	cg15361247	0.044537	8.67862	8.02207e-16	2.09693e-12
rs4359587	cg09152259	0.0504795	8.67663	8.12798e-16	2.11905e-12
rs2251954	cg15361247	0.0445274	8.67617	8.15249e-16	2.11989e-12
rs2742421	cg15361247	0.0448037	8.67376	8.28283e-16	2.14817e-12
rs36053895;rs386355408	cg02893324	-0.0580603	-8.65118	9.61109e-16	2.48618e-12
rs2076857	cg02893324	-0.0581751	-8.65031	9.66631e-16	2.49399e-12
rs9877499	cg15361247	0.0446311	8.64369	1.00967e-15	2.55478e-12
rs2673035;rs142054397	cg15361247	0.0445368	8.63651	1.05855e-15	2.55478e-12
rs2742420	cg15361247	0.0445015	8.62779	1.12102e-15	2.55478e-12
rs2673051	cg15361247	0.0445015	8.62779	1.12102e-15	2.55478e-12
rs2742422	cg15361247	0.0445015	8.62779	1.12102e-15	2.55478e-12
rs2742423	cg15361247	0.0445015	8.62779	1.12102e-15	2.55478e-12
rs17328701	cg15361247	0.0445015	8.62779	1.12102e-15	2.55478e-12
rs1969624	cg15361247	0.0445015	8.62779	1.12102e-15	2.55478e-12
rs1969625	cg15361247	0.0445015	8.62779	1.12102e-15	2.55478e-12
rs1609553	cg15361247	0.0445015	8.62779	1.12102e-15	2.55478e-12
rs1609554	cg15361247	0.0445015	8.62779	1.12102e-15	2.55478e-12
rs2673058	cg15361247	0.0445015	8.62779	1.12102e-15	2.55478e-12
rs2673057	cg15361247	0.0445015	8.62779	1.12102e-15	2.55478e-12
rs2742426	cg15361247	0.0445015	8.62779	1.12102e-15	2.55478e-12
rs2742427	cg15361247	0.0445015	8.62779	1.12102e-15	2.55478e-12
rs2742429	cg15361247	0.0445015	8.62779	1.12102e-15	2.55478e-12
rs2742430	cg15361247	0.0445015	8.62779	1.12102e-15	2.55478e-12
rs2742431	cg15361247	0.0445015	8.62779	1.12102e-15	2.55478e-12
rs2742432	cg15361247	0.0445015	8.62779	1.12102e-15	2.55478e-12
rs2673056	cg15361247	0.0445015	8.62779	1.12102e-15	2.55478e-12
rs9825559	cg15361247	0.0445015	8.62779	1.12102e-15	2.55478e-12
rs9809868	cg15361247	0.0445015	8.62779	1.12102e-15	2.55478e-12
rs9829631	cg15361247	0.0445015	8.62779	1.12102e-15	2.55478e-12
rs1534875	cg15361247	0.0445015	8.62779	1.12102e-15	2.55478e-12
rs1534876	cg15361247	0.0445015	8.62779	1.12102e-15	2.55478e-12
rs2673047	cg15361247	0.0445015	8.62779	1.12102e-15	2.55478e-12
rs2742438	cg15361247	0.0445015	8.62779	1.12102e-15	2.55478e-12
rs2742439	cg15361247	0.0445015	8.62779	1.12102e-15	2.55478e-12
rs938363;rs34519783	cg15361247	0.0445015	8.62779	1.12102e-15	2.55478e-12
rs938362	cg15361247	0.0445015	8.62779	1.12102e-15	2.55478e-12
rs1969626	cg15361247	0.0445015	8.62779	1.12102e-15	2.55478e-12
rs2373047	cg15361247	0.0445015	8.62779	1.12102e-15	2.55478e-12
rs2742441	cg15361247	0.0445015	8.62779	1.12102e-15	2.55478e-12
rs2742442	cg15361247	0.0445015	8.62779	1.12102e-15	2.55478e-12
rs2673038	cg15361247	0.0445015	8.62779	1.12102e-15	2.55478e-12
rs2673037	cg15361247	0.0445015	8.62779	1.12102e-15	2.55478e-12
rs2245705	cg15361247	0.0445015	8.62779	1.12102e-15	2.55478e-12
rs1883096	cg15361247	0.0445015	8.62779	1.12102e-15	2.55478e-12
rs2673036	cg15361247	0.0445015	8.62779	1.12102e-15	2.55478e-12
rs2742445	cg15361247	0.0445015	8.62779	1.12102e-15	2.55478e-12
rs1877934	cg15361247	0.0445015	8.62779	1.12102e-15	2.55478e-12
rs1877933	cg15361247	0.0445015	8.62779	1.12102e-15	2.55478e-12
rs1877932	cg15361247	0.0445015	8.62779	1.12102e-15	2.55478e-12
rs2742369	cg15361247	0.0445015	8.62779	1.12102e-15	2.55478e-12
rs2248991	cg15361247	0.0445015	8.62779	1.12102e-15	2.55478e-12
rs2673034	cg15361247	0.0445015	8.62779	1.12102e-15	2.55478e-12
rs2742385	cg15361247	0.0445015	8.62779	1.12102e-15	2.55478e-12
rs2742389	cg15361247	0.0445015	8.62779	1.12102e-15	2.55478e-12
rs2742390	cg15361247	0.0445015	8.62779	1.12102e-15	2.55478e-12
rs2742393	cg15361247	0.0445015	8.62779	1.12102e-15	2.55478e-12
rs2742373	cg15361247	0.0445015	8.62779	1.12102e-15	2.55478e-12
rs1109278	cg10065189	-0.0390533	-8.62726	1.12492e-15	2.55782e-12
rs2673025	cg15361247	0.0444901	8.62528	1.13964e-15	2.57951e-12
rs2742452	cg15361247	0.0444901	8.62528	1.13964e-15	2.57951e-12
rs2673065	cg15361247	0.0444732	8.62048	1.17619e-15	2.6502e-12
rs2742462	cg15361247	0.0444732	8.62048	1.17619e-15	2.6502e-12
rs2742418	cg15361247	0.0444531	8.61358	1.23074e-15	2.75787e-12
rs2742419	cg15361247	0.0444531	8.61358	1.23074e-15	2.75787e-12
rs7134860	cg27246571	-0.0597886	-8.61203	1.24337e-15	2.75787e-12
rs7134975	cg27246571	-0.0597886	-8.61203	1.24337e-15	2.75787e-12
rs7306086	cg27246571	-0.0597886	-8.61203	1.24337e-15	2.75787e-12
rs61937880	cg27246571	-0.0597886	-8.61203	1.24337e-15	2.75787e-12
rs61937881	cg27246571	-0.0597886	-8.61203	1.24337e-15	2.75787e-12
rs10930579	cg02893324	-0.0581874	-8.60548	1.29795e-15	2.87254e-12
rs2742368	cg15361247	0.0442278	8.59633	1.37832e-15	3.04365e-12
rs17677343	cg27246571	-0.0596565	-8.59286	1.41007e-15	3.10687e-12
rs9905938	cg12582317	0.0517425	8.57828	1.55156e-15	3.40357e-12
rs8064970	cg12582317	0.0517425	8.57828	1.55156e-15	3.40357e-12
rs2742386	cg15361247	0.0439222	8.52546	2.19253e-15	4.79905e-12
rs6800556	cg15361247	0.0441312	8.4746	3.05578e-15	6.67388e-12
rs2660892	cg27246571	-0.0586559	-8.45044	3.57652e-15	7.7941e-12
rs6426551	cg02280892	0.0729145	8.44217	3.77427e-15	8.20709e-12
rs12949028	cg12582317	0.0514737	8.4409	3.8054e-15	8.2388e-12
rs12950062	cg12582317	0.0514737	8.4409	3.8054e-15	8.2388e-12
rs7517174	cg02280892	0.0726778	8.40478	4.8122e-15	1.0396e-11
rs10023382	cg27569037	0.0552752	8.40273	4.87666e-15	1.05124e-11
rs2540488	cg27246571	-0.0571662	-8.37471	5.8483e-15	1.25797e-11
rs2673033	cg15361247	0.0433682	8.34456	7.10872e-15	1.52579e-11
rs4793566	cg12582317	0.0500372	8.3303	7.79515e-15	1.66594e-11
rs7211686	cg12582317	0.0500372	8.3303	7.79515e-15	1.66594e-11
rs2660891	cg27246571	-0.0583922	-8.32598	8.01596e-15	1.70947e-11
rs2673052	cg15361247	0.043818	8.29718	9.65367e-15	2.05432e-11
rs886926	cg12582317	0.0497203	8.28653	1.03399e-14	2.19317e-11
rs2247304	cg27246571	-0.0565274	-8.28637	1.03502e-14	2.19317e-11
rs6668851	cg02280892	0.0704383	8.27034	1.14759e-14	2.42654e-11
rs71343622	cg09152259	0.0560221	8.26202	1.21076e-14	2.55469e-11
rs2660838	cg27246571	-0.0575815	-8.23082	1.47966e-14	3.11546e-11
rs6456150	cg20406979	0.0463926	8.22431	1.54288e-14	3.24173e-11
rs7212186	cg12582317	0.0497809	8.22015	1.58455e-14	3.32226e-11
rs6702917	cg02280892	0.071381	8.20577	1.73777e-14	3.63109e-11
rs2540493	cg27246571	-0.0573215	-8.20564	1.73914e-14	3.63109e-11
rs6932740	cg20406979	0.0462293	8.19201	1.89795e-14	3.67701e-11
rs6934043	cg20406979	0.0462293	8.19201	1.89795e-14	3.67701e-11
rs1358882	cg20406979	0.0462293	8.19201	1.89795e-14	3.67701e-11
rs1358883	cg20406979	0.0462293	8.19201	1.89795e-14	3.67701e-11
rs9457261	cg20406979	0.0462293	8.19201	1.89795e-14	3.67701e-11
rs1407315	cg20406979	0.0462293	8.19201	1.89795e-14	3.67701e-11
rs12527827	cg20406979	0.0462293	8.19201	1.89795e-14	3.67701e-11
rs12529959	cg20406979	0.0462293	8.19201	1.89795e-14	3.67701e-11
rs6909475	cg20406979	0.0462293	8.19201	1.89795e-14	3.67701e-11
rs6909502	cg20406979	0.0462293	8.19201	1.89795e-14	3.67701e-11
rs12523712	cg20406979	0.0462293	8.19201	1.89795e-14	3.67701e-11
rs911632	cg20406979	0.0462293	8.19201	1.89795e-14	3.67701e-11
rs1810644	cg20406979	0.0462293	8.19201	1.89795e-14	3.67701e-11
rs1810645	cg20406979	0.0462293	8.19201	1.89795e-14	3.67701e-11
rs2017338	cg20406979	0.0462293	8.19201	1.89795e-14	3.67701e-11
rs6456151	cg20406979	0.0462293	8.19201	1.89795e-14	3.67701e-11
rs6456153	cg20406979	0.0462293	8.19201	1.89795e-14	3.67701e-11
rs6456154	cg20406979	0.0462293	8.19201	1.89795e-14	3.67701e-11
rs12203510	cg20406979	0.0462293	8.19201	1.89795e-14	3.67701e-11
rs13195158	cg20406979	0.0462293	8.19201	1.89795e-14	3.67701e-11
rs2187859	cg20406979	0.0462293	8.19201	1.89795e-14	3.67701e-11
rs9457266	cg20406979	0.0462293	8.19201	1.89795e-14	3.67701e-11
rs7750209	cg20406979	0.0462293	8.19201	1.89795e-14	3.67701e-11
rs7746628	cg20406979	0.0462293	8.19201	1.89795e-14	3.67701e-11
rs4598049	cg20406979	0.0462293	8.19201	1.89795e-14	3.67701e-11
rs2345753	cg20406979	0.0462293	8.19201	1.89795e-14	3.67701e-11
rs2345754	cg20406979	0.0462293	8.19201	1.89795e-14	3.67701e-11
rs7761977	cg20406979	0.0462293	8.19201	1.89795e-14	3.67701e-11
rs7742305	cg20406979	0.0462293	8.19201	1.89795e-14	3.67701e-11
rs7762156	cg20406979	0.0462293	8.19201	1.89795e-14	3.67701e-11
rs2001115	cg20406979	0.0462293	8.19201	1.89795e-14	3.67701e-11
rs9459862	cg20406979	0.0462293	8.19201	1.89795e-14	3.67701e-11
rs6909180	cg20406979	0.0464452	8.19173	1.90143e-14	3.67701e-11
rs12213683	cg20406979	0.0464452	8.19173	1.90143e-14	3.67701e-11
rs12529876	cg20406979	0.0464452	8.19173	1.90143e-14	3.67701e-11
rs12528323	cg20406979	0.0464452	8.19173	1.90143e-14	3.67701e-11
rs12528689	cg20406979	0.0464452	8.19173	1.90143e-14	3.67701e-11
rs13208636	cg20406979	0.0464452	8.19173	1.90143e-14	3.67701e-11
rs7748224	cg20406979	0.0465709	8.18619	1.97001e-14	3.80224e-11
rs6456149	cg20406979	0.0464047	8.18296	2.01128e-14	3.85947e-11
rs2181058	cg20406979	0.0464047	8.18296	2.01128e-14	3.85947e-11
rs12529238	cg20406979	0.0464047	8.18296	2.01128e-14	3.85947e-11
rs2540497	cg27246571	-0.0569957	-8.15778	2.36282e-14	4.51663e-11
rs2660900	cg27246571	-0.0569957	-8.15778	2.36282e-14	4.51663e-11
rs4793912	cg12582317	0.0497845	8.1422	2.61012e-14	4.97979e-11
rs6936261	cg20406979	0.0458963	8.12251	2.95976e-14	5.60392e-11
rs13210649	cg20406979	0.0458963	8.12251	2.95976e-14	5.60392e-11
rs12213801	cg20406979	0.0458963	8.12251	2.95976e-14	5.60392e-11
rs9457265	cg20406979	0.0458963	8.12251	2.95976e-14	5.60392e-11
rs2251021	cg15361247	-0.0426576	-8.11299	3.14501e-14	5.94337e-11
rs9459853	cg20406979	0.0460667	8.11242	3.15646e-14	5.95371e-11
rs13008554	cg02893324	-0.0547284	-8.08754	3.69853e-14	6.96297e-11
rs7297245	cg27246571	-0.0618404	-8.08447	3.77142e-14	7.0868e-11
rs17761169	cg02893324	-0.0544924	-8.08334	3.79863e-14	7.12449e-11
rs2028382	cg02893324	-0.0527327	-8.05144	4.65248e-14	8.70951e-11
rs3769167	cg02893324	-0.0544238	-8.04328	4.90007e-14	9.14942e-11
rs2673049	cg15361247	-0.0436994	-8.0425	4.92422e-14	9.14942e-11
rs2742392	cg15361247	-0.0436994	-8.0425	4.92422e-14	9.14942e-11
rs2742447	cg15361247	-0.0436994	-8.0425	4.92422e-14	9.14942e-11
rs12633747	cg15361247	-0.0436985	-8.04208	4.93729e-14	9.15664e-11
rs7966537	cg27246571	-0.0619051	-8.04113	4.96709e-14	9.17771e-11
rs17676451	cg27246571	-0.0619051	-8.04113	4.96709e-14	9.17771e-11
rs12525345	cg20406979	0.0456755	8.03871	5.04417e-14	9.30287e-11
rs10018252	cg27569037	0.0559105	8.03766	5.07787e-14	9.34156e-11
rs10745746	cg27246571	-0.0621287	-8.03718	5.09328e-14	9.34156e-11
rs4762659	cg27246571	-0.0621287	-8.03718	5.09328e-14	9.34156e-11
rs2289399	cg02893324	-0.0541974	-8.03428	5.18784e-14	9.49749e-11
rs2673053	cg15361247	-0.0472168	-8.02289	5.57623e-14	1.01525e-10
rs2742424	cg15361247	-0.0472168	-8.02289	5.57623e-14	1.01525e-10
rs2742433	cg15361247	-0.0472168	-8.02289	5.57623e-14	1.01525e-10
rs3754741	cg02893324	-0.0541367	-8.0208	5.65063e-14	1.02692e-10
rs2069918	cg09152259	0.047057	8.01786	5.75705e-14	1.04436e-10
rs2157388	cg20406979	0.0473725	7.99244	6.76216e-14	1.22446e-10
rs9262148	cg16586538	0.0560487	7.97344	7.62488e-14	1.37817e-10
rs6512230	cg02370334	-0.044107	-7.96763	7.90989e-14	1.4271e-10
rs17733203	cg27246571	-0.061248	-7.96327	8.13088e-14	1.45904e-10
rs73216216	cg27246571	-0.061248	-7.96327	8.13088e-14	1.45904e-10
rs56361316	cg27246571	-0.061248	-7.96327	8.13088e-14	1.45904e-10
rs767280	cg15361247	-0.0428654	-7.9598	8.31068e-14	1.46288e-10
rs1468543	cg15361247	-0.0428643	-7.95948	8.32781e-14	1.46288e-10
rs2742406	cg15361247	-0.0428635	-7.95926	8.33899e-14	1.46288e-10
rs9311378	cg15361247	-0.0428635	-7.95926	8.33899e-14	1.46288e-10
rs2742454	cg15361247	-0.0428635	-7.95926	8.33899e-14	1.46288e-10
rs2742435	cg15361247	-0.0428633	-7.95918	8.34328e-14	1.46288e-10
rs2742436	cg15361247	-0.0428633	-7.95918	8.34328e-14	1.46288e-10
rs2742437	cg15361247	-0.0428633	-7.95918	8.34328e-14	1.46288e-10
rs2673039	cg15361247	-0.0428633	-7.95918	8.34328e-14	1.46288e-10
rs2249357	cg15361247	-0.0428633	-7.95918	8.34328e-14	1.46288e-10
rs2742397	cg15361247	-0.0428633	-7.95918	8.34328e-14	1.46288e-10
rs2673028	cg15361247	-0.0428633	-7.95918	8.34328e-14	1.46288e-10
rs9821974;rs71622516	cg15361247	-0.0428633	-7.95918	8.34328e-14	1.46288e-10
rs12301817	cg27246571	-0.0584836	-7.95246	8.70465e-14	1.52356e-10
rs9262113	cg16586538	0.0552242	7.94206	9.29503e-14	1.6212e-10
rs7759666	cg16586538	0.0552242	7.94206	9.29503e-14	1.6212e-10
rs9262122	cg16586538	0.0554802	7.938	9.53554e-14	1.66024e-10
rs3893313	cg09152259	0.0477314	7.92591	1.02903e-13	1.78853e-10
rs56396137	cg27246571	-0.0618448	-7.9181	1.08093e-13	1.87545e-10
rs2069928	cg09152259	0.0491326	7.91669	1.09056e-13	1.88234e-10
rs7137420	cg27246571	-0.059502	-7.91613	1.09435e-13	1.88234e-10
rs7308844	cg27246571	-0.059502	-7.91613	1.09435e-13	1.88234e-10
rs6538694	cg27246571	-0.059502	-7.91613	1.09435e-13	1.88234e-10
rs6538695	cg27246571	-0.059502	-7.91613	1.09435e-13	1.88234e-10
rs720325	cg20406979	0.0452166	7.90373	1.18317e-13	2.03162e-10
rs2069914	cg09152259	0.0441028	7.89434	1.25511e-13	2.15142e-10
rs2069913	cg09152259	0.0462272	7.87988	1.37438e-13	2.35183e-10
rs76882214	cg27246571	-0.0613068	-7.86955	1.46649e-13	2.50085e-10
rs74334526	cg27246571	-0.0613068	-7.86955	1.46649e-13	2.50085e-10
rs7211504	cg16851743	-0.0426861	-7.86604	1.49914e-13	2.55215e-10
rs9459855	cg20406979	0.0467252	7.84191	1.74381e-13	2.96363e-10
rs4713340	cg16586538	0.0548462	7.83866	1.77968e-13	3.01943e-10
rs6538693	cg27246571	-0.0610734	-7.8373	1.7948e-13	3.0399e-10
rs12989081	cg09152259	0.0391812	7.83571	1.81282e-13	3.06521e-10
rs305069	cg22873414	-0.0431011	-7.81096	2.11616e-13	3.57206e-10
rs10484530	cg20406979	0.0465924	7.79257	2.37372e-13	4.00003e-10
rs9457260	cg20406979	0.0463136	7.78817	2.43971e-13	4.02942e-10
rs17524252	cg20406979	0.0463136	7.78817	2.43971e-13	4.02942e-10
rs4710175	cg20406979	0.0463136	7.78817	2.43971e-13	4.02942e-10
rs916331	cg20406979	0.0463136	7.78817	2.43971e-13	4.02942e-10
rs13204839	cg20406979	0.0463136	7.78817	2.43971e-13	4.02942e-10
rs6456152	cg20406979	0.0463136	7.78817	2.43971e-13	4.02942e-10
rs9457262	cg20406979	0.0463136	7.78817	2.43971e-13	4.02942e-10
rs4412174	cg20406979	0.0463136	7.78817	2.43971e-13	4.02942e-10
rs4458654	cg20406979	0.0463136	7.78817	2.43971e-13	4.02942e-10
rs34155048	cg20406979	0.0463136	7.78817	2.43971e-13	4.02942e-10
rs34611616	cg20406979	0.0463136	7.78817	2.43971e-13	4.02942e-10
rs7766242	cg20406979	0.0463136	7.78817	2.43971e-13	4.02942e-10
rs424971	cg22873414	0.0411781	7.77954	2.57462e-13	4.24519e-10
rs12209395	cg20406979	0.0465038	7.77538	2.64224e-13	4.33516e-10
rs6920858	cg20406979	0.0465038	7.77538	2.64224e-13	4.33516e-10
rs9459854	cg20406979	0.0465038	7.77538	2.64224e-13	4.33516e-10
rs79268829	cg05840754	-0.0735112	-7.76723	2.77982e-13	4.55338e-10
rs12692064	cg09152259	0.0396598	7.76581	2.80465e-13	4.58652e-10
rs2069912	cg09152259	0.0434984	7.76249	2.86314e-13	4.67448e-10
rs75893338	cg05840754	-0.0726979	-7.76218	2.86873e-13	4.67595e-10
rs6509196	cg05840754	-0.0770544	-7.75646	2.97272e-13	4.83753e-10
rs34658268	cg02893324	-0.052404	-7.75602	2.98087e-13	4.84289e-10
rs171329	cg09017117	-0.0392813	-7.74061	3.28061e-13	5.32118e-10
rs6430935	cg09152259	0.0394072	7.7364	3.36771e-13	5.45358e-10
rs13017438	cg02893324	-0.0529573	-7.73197	3.46171e-13	5.59669e-10
rs10915994	cg02280892	0.0689714	7.72415	3.63389e-13	5.86126e-10
rs12208359	cg20406979	0.0464131	7.72401	3.63712e-13	5.86126e-10
rs60864846	cg05840754	-0.0769417	-7.72255	3.67016e-13	5.90494e-10
rs2742379	cg15361247	-0.0420098	-7.71652	3.81014e-13	6.12027e-10
rs2239827	cg20406979	0.0459189	7.70648	4.05498e-13	6.50308e-10
rs10946207	cg20406979	0.0463133	7.705	4.09258e-13	6.5423e-10
rs2038580	cg20406979	0.0463133	7.705	4.09258e-13	6.5423e-10
rs9262152	cg16586538	0.0539193	7.69925	4.24112e-13	6.76889e-10
rs1990231	cg12229367	0.0252191	7.68771	4.55524e-13	7.18957e-10
rs9910446	cg12229367	0.0252191	7.68771	4.55524e-13	7.18957e-10
rs12451748	cg12229367	0.0252191	7.68771	4.55524e-13	7.18957e-10
rs12451753	cg12229367	0.0252191	7.68771	4.55524e-13	7.18957e-10
rs12449409	cg12229367	0.0252191	7.68771	4.55524e-13	7.18957e-10
rs7220397	cg12229367	0.0252191	7.68771	4.55524e-13	7.18957e-10
rs8081251	cg12229367	0.0252191	7.68771	4.55524e-13	7.18957e-10
rs9893344	cg12582317	0.0485005	7.67876	4.81494e-13	7.58744e-10
rs7258183	cg05840754	-0.0764227	-7.67766	4.84775e-13	7.61504e-10
rs73562275	cg05840754	-0.0764227	-7.67766	4.84775e-13	7.61504e-10
rs2289397	cg02893324	-0.0522306	-7.66451	5.25866e-13	8.24751e-10
rs73562265	cg05840754	-0.0763235	-7.65959	5.4211e-13	8.48891e-10
rs9262147	cg16586538	0.0553284	7.65695	5.51021e-13	8.61489e-10
rs13001648	cg09152259	0.040948	7.64629	5.88504e-13	9.1865e-10
rs9262136	cg16586538	0.0548085	7.64145	6.06355e-13	9.45034e-10
rs12302993	cg27246571	-0.0493529	-7.60662	7.5159e-13	1.16956e-09
rs73216221	cg27246571	-0.0587157	-7.60075	7.79234e-13	1.21069e-09
rs4662729	cg09152259	0.0407005	7.58095	8.80152e-13	1.36535e-09
rs1883094	cg15361247	-0.0447342	-7.56595	9.65065e-13	1.49474e-09
rs35798859;rs531335101	cg20406979	0.0455882	7.54866	1.07308e-12	1.65947e-09
rs2666428	cg02280892	0.0607839	7.53593	1.16011e-12	1.79127e-09
rs2894041	cg16586538	0.0544436	7.53316	1.17993e-12	1.81905e-09
rs12490293	cg15361247	0.0405087	7.51526	1.3165e-12	2.02646e-09
rs3219112	cg02280892	0.0597573	7.51337	1.33182e-12	2.04372e-09
rs3754376	cg02280892	0.0597573	7.51337	1.33182e-12	2.04372e-09
rs6728362	cg09152259	0.0404149	7.51002	1.35938e-12	2.0828e-09
rs712210	cg16119449	-0.0475028	-7.50376	1.41239e-12	2.1607e-09
rs9675230	cg23470227	-0.0395809	-7.48925	1.54322e-12	2.35723e-09
rs3212713;rs386807459	cg02370334	-0.0415835	-7.48696	1.56495e-12	2.38676e-09
rs9905938	cg12229367	0.0248327	7.48069	1.62602e-12	2.47233e-09
rs8064970	cg12229367	0.0248327	7.48069	1.62602e-12	2.47233e-09
rs712211	cg16119449	-0.0480308	-7.47371	1.69669e-12	2.57585e-09
rs2793382	cg02280892	0.0598421	7.46931	1.74278e-12	2.63377e-09
rs2793380	cg02280892	0.0598421	7.46931	1.74278e-12	2.63377e-09
rs2793657	cg02280892	0.0598421	7.46931	1.74278e-12	2.63377e-09
rs9906591	cg12229367	0.0248697	7.46046	1.83933e-12	2.77127e-09
rs886925	cg12229367	0.0248697	7.46046	1.83933e-12	2.77127e-09
rs4709147	cg20406979	0.0464348	7.45922	1.85321e-12	2.78797e-09
rs886926	cg12229367	0.0244252	7.4527	1.92824e-12	2.89648e-09
rs3212711	cg02370334	-0.0415236	-7.44829	1.98074e-12	2.97085e-09
rs8078208	cg23470227	-0.0393755	-7.44256	2.05095e-12	3.07154e-09
rs9347170	cg20406979	-0.0445929	-7.42803	2.2404e-12	3.35022e-09
rs9459872	cg20406979	0.0463027	7.41699	2.39565e-12	3.57701e-09
rs2516640	cg16586538	0.0524362	7.40191	2.62506e-12	3.91368e-09
rs17615336	cg20406979	0.0457814	7.38851	2.84716e-12	4.23846e-09
rs12332076	cg27569037	0.0612585	7.38646	2.88264e-12	4.27848e-09
rs9993501	cg27569037	0.0612585	7.38646	2.88264e-12	4.27848e-09
rs2069921	cg09152259	0.0411352	7.38547	2.89994e-12	4.29137e-09
rs973760	cg09152259	0.0411352	7.38547	2.89994e-12	4.29137e-09
rs3219090	cg02280892	0.05949	7.37453	3.09853e-12	4.57844e-09
rs4947285	cg16586538	0.0539285	7.37335	3.12073e-12	4.60441e-09
rs2285148	cg20406979	0.0442809	7.37302	3.12698e-12	4.6068e-09
rs9262124	cg16586538	0.0538314	7.37065	3.17216e-12	4.66646e-09
rs747657	cg02280892	0.0593827	7.36001	3.38283e-12	4.96903e-09
rs4793566	cg12229367	0.0242251	7.35571	3.47184e-12	5.08478e-09
rs7211686	cg12229367	0.0242251	7.35571	3.47184e-12	5.08478e-09
rs3219119	cg02280892	0.0592096	7.35327	3.52337e-12	5.15268e-09
rs2048424	cg02280892	0.0597618	7.33947	3.8294e-12	5.58382e-09
rs1417765	cg02280892	0.0597618	7.33947	3.8294e-12	5.58382e-09
rs11680815	cg09152259	0.0533731	7.33357	3.96812e-12	5.77763e-09
rs11697330	cg00568296	-0.0582897	-7.30875	4.60803e-12	6.69956e-09
rs758506	cg05840754	-0.0737857	-7.30288	4.7735e-12	6.93002e-09
rs2247771	cg15361247	-0.0433378	-7.29757	4.92853e-12	7.14467e-09
rs2069933	cg09152259	0.0388983	7.29675	4.95277e-12	7.15749e-09
rs443570	cg23216724	0.0491015	7.29658	4.95779e-12	7.15749e-09
rs2910884	cg06726471	0.0443611	7.29655	4.95893e-12	7.15749e-09
rs2377313	cg02280892	0.0589877	7.29029	5.14883e-12	7.42082e-09
rs1811123	cg23216724	0.0491885	7.28804	5.21907e-12	7.51119e-09
rs12949688	cg12582317	0.0475375	7.28091	5.44747e-12	7.82858e-09
rs55874825	cg01297684	0.051675	7.27753	5.55913e-12	7.97754e-09
rs62242234	cg15361247	-0.0461702	-7.27579	5.61724e-12	8.04932e-09
rs2239826	cg20406979	0.0456557	7.26673	5.93114e-12	8.48692e-09
rs1401296	cg09152259	0.0387959	7.25771	6.2608e-12	8.94578e-09
rs2757039	cg20406979	-0.0433941	-7.25406	6.39933e-12	9.13062e-09
rs10424547	cg25690897	-0.0540837	-7.25091	6.52111e-12	9.29107e-09
rs7686032	cg27569037	0.0589991	7.24987	6.56188e-12	9.33581e-09
rs2673048	cg15361247	0.0453826	7.24887	6.60107e-12	9.3648e-09
rs2742457	cg15361247	0.0453826	7.24887	6.60107e-12	9.3648e-09
rs2015864	cg23216724	0.0488771	7.24833	6.62261e-12	9.382e-09
rs58413607	cg25690897	-0.0541362	-7.23503	7.17138e-12	1.0145e-08
rs12525855	cg20406979	0.0431757	7.23401	7.21505e-12	1.01634e-08
rs10946209	cg20406979	0.0431757	7.23401	7.21505e-12	1.01634e-08
rs2001114	cg20406979	0.0431757	7.23401	7.21505e-12	1.01634e-08
rs62436765	cg20406979	0.0433818	7.23121	7.33717e-12	1.03063e-08
rs10946208	cg20406979	0.0433818	7.23121	7.33717e-12	1.03063e-08
rs1962800	cg15361247	0.0453242	7.22929	7.42193e-12	1.04107e-08
rs2757044	cg23216724	0.0487927	7.22641	7.55067e-12	1.05764e-08
rs7212186	cg12229367	0.0239902	7.22227	7.73991e-12	1.08262e-08
rs552492	cg19070398	-0.0504529	-7.22017	7.83764e-12	1.09476e-08
rs4794668	cg15815084	0.064392	7.21918	7.88407e-12	1.0997e-08
rs998247	cg00302379	-0.0242678	-7.21692	7.99108e-12	1.11151e-08
rs10143198	cg00302379	-0.0242678	-7.21692	7.99108e-12	1.11151e-08
rs17585333	cg27569037	0.0590885	7.20201	8.73509e-12	1.2133e-08
rs393727	cg23216724	0.0483297	7.19838	8.92648e-12	1.23816e-08
rs4662730	cg09152259	0.038637	7.19497	9.10955e-12	1.2603e-08
rs7251606	cg25690897	-0.0504508	-7.19494	9.11141e-12	1.2603e-08
rs11735317	cg27569037	0.0601045	7.18747	9.52613e-12	1.31584e-08
rs2048426	cg02280892	0.0576435	7.18131	9.88213e-12	1.36296e-08
rs828875	cg12777002	0.0427108	7.18087	9.90833e-12	1.36296e-08
rs828874	cg12777002	0.0427108	7.18087	9.90833e-12	1.36296e-08
rs12949028	cg12229367	0.0241745	7.17351	1.03516e-11	1.42001e-08
rs12950062	cg12229367	0.0241745	7.17351	1.03516e-11	1.42001e-08
rs2149083	cg23216724	0.048279	7.16948	1.06028e-11	1.43667e-08
rs2149084	cg23216724	0.048279	7.16948	1.06028e-11	1.43667e-08
rs2769346	cg23216724	0.048279	7.16948	1.06028e-11	1.43667e-08
rs2149085	cg23216724	0.048279	7.16948	1.06028e-11	1.43667e-08
rs2769347	cg23216724	0.048279	7.16948	1.06028e-11	1.43667e-08
rs2769348	cg23216724	0.048279	7.16948	1.06028e-11	1.43667e-08
rs2149090	cg23216724	0.048279	7.16948	1.06028e-11	1.43667e-08
rs2149091	cg23216724	0.048279	7.16948	1.06028e-11	1.43667e-08
rs2149092	cg23216724	0.048279	7.16948	1.06028e-11	1.43667e-08
rs12946237	cg15815084	0.0639917	7.16856	1.06614e-11	1.44263e-08
rs7147987	cg00302379	-0.0253802	-7.16292	1.10251e-11	1.4475e-08
rs1805414	cg02280892	0.0586008	7.15786	1.13617e-11	1.4475e-08
rs2027439	cg02280892	0.0586008	7.15786	1.13617e-11	1.4475e-08
rs394522	cg23216724	0.0482864	7.15124	1.18178e-11	1.4475e-08
rs1819333	cg23216724	0.0482849	7.15105	1.1831e-11	1.4475e-08
rs2013815	cg23216724	0.0482849	7.15105	1.1831e-11	1.4475e-08
rs2769349	cg23216724	0.0482849	7.15105	1.1831e-11	1.4475e-08
rs1187530	cg23216724	0.0482849	7.15105	1.1831e-11	1.4475e-08
rs2757050	cg23216724	0.0482849	7.15105	1.1831e-11	1.4475e-08
rs1590257	cg23216724	0.0482849	7.15105	1.1831e-11	1.4475e-08
rs2769351	cg23216724	0.0482849	7.15105	1.1831e-11	1.4475e-08
rs6939196	cg23216724	0.0482849	7.15105	1.1831e-11	1.4475e-08
rs2769354	cg23216724	0.0482849	7.15105	1.1831e-11	1.4475e-08
rs2757052	cg23216724	0.0482849	7.15105	1.1831e-11	1.4475e-08
rs1211447	cg23216724	0.0482849	7.15105	1.1831e-11	1.4475e-08
rs1187532	cg23216724	0.0482849	7.15105	1.1831e-11	1.4475e-08
rs434093	cg23216724	0.0482849	7.15105	1.1831e-11	1.4475e-08
rs448060	cg23216724	0.0482849	7.15105	1.1831e-11	1.4475e-08
rs365189	cg23216724	0.0482849	7.15105	1.1831e-11	1.4475e-08
rs376551	cg23216724	0.0482849	7.15105	1.1831e-11	1.4475e-08
rs386548	cg23216724	0.0482849	7.15105	1.1831e-11	1.4475e-08
rs402749	cg23216724	0.0482849	7.15105	1.1831e-11	1.4475e-08
rs385863	cg23216724	0.0482849	7.15105	1.1831e-11	1.4475e-08
rs397713	cg23216724	0.0482849	7.15105	1.1831e-11	1.4475e-08
rs453184	cg23216724	0.0482849	7.15105	1.1831e-11	1.4475e-08
rs436707	cg23216724	0.0482849	7.15105	1.1831e-11	1.4475e-08
rs442298	cg23216724	0.0482849	7.15105	1.1831e-11	1.4475e-08
rs377753	cg23216724	0.0482849	7.15105	1.1831e-11	1.4475e-08
rs430477	cg23216724	0.0482849	7.15105	1.1831e-11	1.4475e-08
rs376574	cg23216724	0.0482849	7.15105	1.1831e-11	1.4475e-08
rs439237	cg23216724	0.0482849	7.15105	1.1831e-11	1.4475e-08
rs9457247	cg23216724	0.0482849	7.15105	1.1831e-11	1.4475e-08
rs9459827	cg23216724	0.0482849	7.15105	1.1831e-11	1.4475e-08
rs1794699	cg23216724	0.0482849	7.15105	1.1831e-11	1.4475e-08
rs1743439	cg23216724	0.0482849	7.15105	1.1831e-11	1.4475e-08
rs13192426	cg23216724	0.0482849	7.15105	1.1831e-11	1.4475e-08
rs13192687	cg23216724	0.0482849	7.15105	1.1831e-11	1.4475e-08
rs9717548	cg23216724	0.0482849	7.15105	1.1831e-11	1.4475e-08
rs5020533	cg23216724	0.0482849	7.15105	1.1831e-11	1.4475e-08
rs1620933	cg23216724	0.0482849	7.15105	1.1831e-11	1.4475e-08
rs415987	cg23216724	0.0482849	7.15105	1.1831e-11	1.4475e-08
rs1794697	cg23216724	0.0482849	7.15105	1.1831e-11	1.4475e-08
rs34560498;rs386708543	cg23216724	0.0482849	7.15105	1.1831e-11	1.4475e-08
rs414437	cg23216724	0.0482849	7.15105	1.1831e-11	1.4475e-08
rs421214	cg23216724	0.0482849	7.15105	1.1831e-11	1.4475e-08
rs422094	cg23216724	0.0482849	7.15105	1.1831e-11	1.4475e-08
rs393558	cg23216724	0.0482849	7.15105	1.1831e-11	1.4475e-08
rs436625	cg23216724	0.0482849	7.15105	1.1831e-11	1.4475e-08
rs408040	cg23216724	0.0482849	7.15105	1.1831e-11	1.4475e-08
rs408918	cg23216724	0.0482849	7.15105	1.1831e-11	1.4475e-08
rs413232	cg23216724	0.0482849	7.15105	1.1831e-11	1.4475e-08
rs86755	cg23216724	0.0482849	7.15105	1.1831e-11	1.4475e-08
rs382009	cg23216724	0.0482849	7.15105	1.1831e-11	1.4475e-08
rs428805	cg23216724	0.0482849	7.15105	1.1831e-11	1.4475e-08
rs2345571	cg23216724	0.0482849	7.15105	1.1831e-11	1.4475e-08
rs385460	cg23216724	0.0482849	7.15105	1.1831e-11	1.4475e-08
rs385113	cg23216724	0.0482849	7.15105	1.1831e-11	1.4475e-08
rs932644	cg23216724	0.0482849	7.15105	1.1831e-11	1.4475e-08
rs10946198	cg23216724	0.0482849	7.15105	1.1831e-11	1.4475e-08
rs1743440	cg23216724	0.0482849	7.15105	1.1831e-11	1.4475e-08
rs1743441	cg23216724	0.0482849	7.15105	1.1831e-11	1.4475e-08
rs1794694	cg23216724	0.0482849	7.15105	1.1831e-11	1.4475e-08
rs430293	cg23216724	0.0482849	7.15105	1.1831e-11	1.4475e-08
rs430097	cg23216724	0.0482849	7.15105	1.1831e-11	1.4475e-08
rs409356	cg23216724	0.0482849	7.15105	1.1831e-11	1.4475e-08
rs447042	cg23216724	0.0482849	7.15105	1.1831e-11	1.4475e-08
rs402191	cg23216724	0.0482849	7.15105	1.1831e-11	1.4475e-08
rs1794693	cg23216724	0.0482849	7.15105	1.1831e-11	1.4475e-08
rs401260	cg23216724	0.0482849	7.15105	1.1831e-11	1.4475e-08
rs422694	cg23216724	0.0482849	7.15105	1.1831e-11	1.4475e-08
rs422780	cg23216724	0.0482849	7.15105	1.1831e-11	1.4475e-08
rs400176	cg23216724	0.0482849	7.15105	1.1831e-11	1.4475e-08
rs422562	cg23216724	0.0482849	7.15105	1.1831e-11	1.4475e-08
rs416131	cg23216724	0.0482849	7.15105	1.1831e-11	1.4475e-08
rs415890	cg23216724	0.0482849	7.15105	1.1831e-11	1.4475e-08
rs415842	cg23216724	0.0482849	7.15105	1.1831e-11	1.4475e-08
rs389956	cg23216724	0.0482849	7.15105	1.1831e-11	1.4475e-08
rs389946	cg23216724	0.0482849	7.15105	1.1831e-11	1.4475e-08
rs10946199	cg23216724	0.0482771	7.14983	1.19166e-11	1.45619e-08
rs366938	cg23216724	0.0482536	7.14573	1.22106e-11	1.48706e-08
rs1811121	cg23216724	0.0482536	7.14573	1.22106e-11	1.48706e-08
rs401261	cg23216724	0.0482593	7.14568	1.22141e-11	1.48706e-08
rs444210	cg23216724	-0.0482852	-7.13792	1.27898e-11	1.55207e-08
rs364283	cg23216724	0.0483998	7.13786	1.27947e-11	1.55207e-08
rs429083	cg23216724	0.0483998	7.13786	1.27947e-11	1.55207e-08
rs17279465	cg15361247	-0.0395733	-7.13475	1.30329e-11	1.57903e-08
rs2578665	cg15361247	-0.04272	-7.13449	1.3053e-11	1.57955e-08
rs3896369	cg15815084	0.063616	7.13351	1.31291e-11	1.5849e-08
rs11649870	cg15815084	0.063616	7.13351	1.31291e-11	1.5849e-08
rs3108163	cg12777002	0.0424193	7.13296	1.31722e-11	1.58818e-08
rs2251109	cg15361247	-0.0410222	-7.1324	1.32158e-11	1.59151e-08
rs576702	cg19070398	0.0490342	7.13099	1.33268e-11	1.60294e-08
rs2742434	cg15361247	0.0442965	7.12972	1.34279e-11	1.61211e-08
rs2769355	cg23216724	0.0487327	7.12942	1.34516e-11	1.61211e-08
rs2757054	cg23216724	0.0487327	7.12942	1.34516e-11	1.61211e-08
rs10461909	cg06726471	0.0456418	7.12844	1.35298e-11	1.61953e-08
rs28556935	cg02893324	-0.047198	-7.1238	1.39074e-11	1.66273e-08
rs1397550	cg02280892	0.0567474	7.1212	1.41235e-11	1.68303e-08
rs1341336	cg02280892	0.0567713	7.11954	1.42631e-11	1.68303e-08
rs2793378	cg02280892	0.0567713	7.11954	1.42631e-11	1.68303e-08
rs1104893	cg02280892	0.0567713	7.11954	1.42631e-11	1.68303e-08
rs2793377	cg02280892	0.0567713	7.11954	1.42631e-11	1.68303e-08
rs2377013	cg02280892	0.0567713	7.11954	1.42631e-11	1.68303e-08
rs2249844	cg02280892	0.0567713	7.11954	1.42631e-11	1.68303e-08
rs1828446	cg02280892	0.0567713	7.11954	1.42631e-11	1.68303e-08
rs1828445	cg02280892	0.0567713	7.11954	1.42631e-11	1.68303e-08
rs2793654	cg02280892	0.0567713	7.11954	1.42631e-11	1.68303e-08
rs2666427	cg02280892	0.0567713	7.11954	1.42631e-11	1.68303e-08
rs11685001	cg02893324	-0.049286	-7.11667	1.45071e-11	1.7098e-08
rs3966008	cg15815084	0.0634212	7.10717	1.53467e-11	1.79811e-08
rs1899629	cg15815084	0.0634212	7.10717	1.53467e-11	1.79811e-08
rs4793831	cg15815084	0.0634212	7.10717	1.53467e-11	1.79811e-08
rs3853823	cg15815084	0.0634212	7.10717	1.53467e-11	1.79811e-08
rs7219961	cg15815084	0.0634212	7.10717	1.53467e-11	1.79811e-08
rs8078452	cg23470227	-0.0381905	-7.09817	1.61862e-11	1.89425e-08
rs112264669;rs148230910;rs746712206;rs369727001;rs371862832;rs375707057;rs386733089;rs796779136;rs867086807	cg20859453	0.093323	7.09525	1.64678e-11	1.92494e-08
rs405553	cg23216724	0.0482504	7.08563	1.74315e-11	2.0352e-08
rs2052563	cg06726471	0.04566	7.06455	1.97416e-11	2.30222e-08
rs4691171	cg27569037	0.0543033	7.05858	2.04486e-11	2.36803e-08
rs4691172	cg27569037	0.0543033	7.05858	2.04486e-11	2.36803e-08
rs28495910	cg27569037	0.0543033	7.05858	2.04486e-11	2.36803e-08
rs9968334	cg27569037	0.0543033	7.05858	2.04486e-11	2.36803e-08
rs6834975	cg27569037	0.0543033	7.05858	2.04486e-11	2.36803e-08
rs6835694	cg27569037	0.0543033	7.05858	2.04486e-11	2.36803e-08
rs12198816	cg20406979	0.0424001	7.05347	2.10741e-11	2.43763e-08
rs2332966	cg12229367	0.0234923	7.05082	2.14051e-11	2.47304e-08
rs971207	cg09152259	0.0377872	7.0494	2.15847e-11	2.48802e-08
rs1518759	cg09152259	0.0377872	7.0494	2.15847e-11	2.48802e-08
rs1957949	cg00302379	-0.0238825	-7.03995	2.28202e-11	2.62739e-08
rs2534816	cg16586538	0.0516838	7.0323	2.38703e-11	2.74512e-08
rs12313602	cg01297684	0.0509705	7.02647	2.47038e-11	2.83629e-08
rs55927117	cg01297684	0.0513822	7.02635	2.472e-11	2.83629e-08
rs4710147	cg23216724	0.0477494	7.0215	2.5435e-11	2.90828e-08
rs2757046	cg23216724	0.0477494	7.0215	2.5435e-11	2.90828e-08
rs2757047	cg23216724	0.0477494	7.0215	2.5435e-11	2.90828e-08
rs9624047	cg06040542	-0.037818	-7.0204	2.55997e-11	2.92374e-08
rs1865222	cg02280892	0.0564631	7.01419	2.65515e-11	3.00831e-08
rs1865221	cg02280892	0.0564631	7.01419	2.65515e-11	3.00831e-08
rs1865220	cg02280892	0.0564631	7.01419	2.65515e-11	3.00831e-08
rs2695235	cg02280892	0.0564631	7.01419	2.65515e-11	3.00831e-08
rs2793655	cg02280892	0.0564631	7.01419	2.65515e-11	3.00831e-08
rs2793376	cg02280892	0.0564631	7.01419	2.65515e-11	3.00831e-08
rs2695236	cg02280892	0.0564631	7.01419	2.65515e-11	3.00831e-08
rs8054065	cg22873414	0.0375587	7.01291	2.67519e-11	3.02757e-08
rs8512	cg16586538	0.0489807	7.01052	2.71297e-11	3.06684e-08
rs2345573	cg23216724	0.0477753	7.00773	2.75782e-11	3.114e-08
rs4710149	cg20406979	-0.0422125	-7.00517	2.79949e-11	3.14797e-08
rs7750593	cg20406979	-0.0422125	-7.00517	2.79949e-11	3.14797e-08
rs5996483	cg06040542	-0.0377982	-7.00511	2.80055e-11	3.14797e-08
rs2267011	cg06040542	-0.0377982	-7.00511	2.80055e-11	3.14797e-08
rs4972533	cg02893324	-0.047637	-7.00447	2.81095e-11	3.1561e-08
rs56816393	cg06726471	0.0426864	7.00384	2.82134e-11	3.16064e-08
rs2910907	cg06726471	0.0426864	7.00384	2.82134e-11	3.16064e-08
rs4605609	cg27569037	0.0486997	6.9982	2.91637e-11	3.26342e-08
rs2296316	cg00302379	-0.0245526	-6.99419	2.98567e-11	3.33723e-08
rs2695237	cg02280892	0.0559046	6.99227	3.01949e-11	3.37125e-08
rs11649318	cg22873414	0.0370994	6.98876	3.08215e-11	3.43735e-08
rs2963960	cg06726471	0.0454795	6.98532	3.14496e-11	3.50347e-08
rs17581728	cg23470227	-0.0422946	-6.97974	3.24935e-11	3.61572e-08
rs5936	cg09152259	0.0371857	6.97768	3.28893e-11	3.65567e-08
rs2673067	cg15361247	-0.040057	-6.96554	3.5309e-11	3.92025e-08
rs17527080	cg06726471	0.0460808	6.96508	3.54051e-11	3.92655e-08
rs4997107	cg23216724	0.0476797	6.96145	3.61648e-11	4.00634e-08
rs2052561	cg06726471	0.0455352	6.95992	3.64878e-11	4.03763e-08
rs5751606	cg06040542	-0.0375294	-6.95935	3.66108e-11	4.03779e-08
rs5759637	cg06040542	-0.0375294	-6.95935	3.66108e-11	4.03779e-08
rs12484280	cg06040542	-0.0375294	-6.95935	3.66108e-11	4.03779e-08
rs2236313	cg20406979	-0.0422717	-6.95449	3.76639e-11	4.14934e-08
rs2910926	cg06726471	0.0453366	6.95359	3.78627e-11	4.16662e-08
rs61219219	cg06726471	0.0421961	6.94907	3.88752e-11	4.27333e-08
rs67272103	cg08928926	0.0582873	6.94759	3.92127e-11	4.30567e-08
rs860455	cg12777002	0.040863	6.94459	3.99073e-11	4.37711e-08
rs12460985	cg05840754	-0.0626819	-6.94206	4.05011e-11	4.43736e-08
rs8112667	cg25690897	-0.0482421	-6.94019	4.09445e-11	4.481e-08
rs57425612	cg25690897	-0.0518899	-6.9376	4.15673e-11	4.54417e-08
rs2071434	cg06040542	-0.0372683	-6.93002	4.34466e-11	4.74442e-08
rs6941355	cg20406979	0.0424532	6.92959	4.35558e-11	4.75113e-08
rs187753759	cg09152259	0.0459395	6.92916	4.36637e-11	4.75248e-08
rs880933	cg09152259	0.0459395	6.92916	4.36637e-11	4.75248e-08
rs7716300	cg06726471	0.0452011	6.92645	4.43599e-11	4.81773e-08
rs7715899	cg06726471	0.0452011	6.92645	4.43599e-11	4.81773e-08
rs9262162	cg16586538	0.0498159	6.92027	4.59864e-11	4.98894e-08
rs555209	cg19070398	-0.0478037	-6.91912	4.62942e-11	5.01687e-08
rs2290769	cg23470227	-0.0415839	-6.91794	4.66131e-11	5.04593e-08
rs525861	cg19070398	-0.0477897	-6.91723	4.68081e-11	5.06154e-08
rs2247314	cg20406979	-0.0413264	-6.91545	4.7295e-11	5.10865e-08
rs79858158	cg27246571	-0.0559084	-6.91104	4.85255e-11	5.23483e-08
rs12178491	cg20406979	0.0437663	6.91088	4.85684e-11	5.23483e-08
rs61937885	cg27246571	-0.0567715	-6.907	4.96796e-11	5.34881e-08
rs17677763	cg27246571	-0.0560578	-6.90136	5.13342e-11	5.51503e-08
rs61937883	cg27246571	-0.0560578	-6.90136	5.13342e-11	5.51503e-08
rs73152631	cg06040542	-0.038447	-6.90068	5.1537e-11	5.53086e-08
rs9366078	cg20406979	-0.0413061	-6.90025	5.16673e-11	5.53887e-08
rs2757053	cg20406979	-0.0414448	-6.89698	5.26578e-11	5.63293e-08
rs1130033	cg20406979	-0.0414448	-6.89698	5.26578e-11	5.63293e-08
rs57557794	cg06726471	0.0450256	6.89589	5.29929e-11	5.65057e-08
rs60649342	cg06726471	0.0450256	6.89589	5.29929e-11	5.65057e-08
rs16889557	cg06726471	0.0450256	6.89589	5.29929e-11	5.65057e-08
rs13183947	cg06726471	0.0465168	6.87713	5.90919e-11	6.29416e-08
rs7224488	cg15815084	0.061403	6.86879	6.20222e-11	6.59922e-08
rs408087	cg23216724	-0.0463854	-6.86782	6.23721e-11	6.62937e-08
rs12055488	cg20406979	-0.0416146	-6.8671	6.26296e-11	6.6355e-08
rs3963512	cg20406979	-0.0416146	-6.8671	6.26296e-11	6.6355e-08
rs9355610	cg20406979	-0.0416146	-6.8671	6.26296e-11	6.6355e-08
rs112267124;rs767502356	cg23470227	-0.0413765	-6.86432	6.3648e-11	6.72185e-08
rs2239824	cg20406979	0.0436468	6.86396	6.37822e-11	6.72185e-08
rs55873403	cg20406979	0.0436468	6.86396	6.37822e-11	6.72185e-08
rs12193698	cg20406979	0.0436468	6.86396	6.37822e-11	6.72185e-08
rs2239823	cg20406979	0.0436468	6.86396	6.37822e-11	6.72185e-08
rs17677715	cg27246571	-0.0555742	-6.8637	6.38785e-11	6.72489e-08
rs2247315	cg20406979	-0.0411469	-6.8627	6.42474e-11	6.75659e-08
rs2910885	cg06726471	0.0447937	6.8617	6.46212e-11	6.78157e-08
rs2910886	cg06726471	0.0447937	6.8617	6.46212e-11	6.78157e-08
rs6886940	cg06726471	0.0465159	6.86048	6.50812e-11	6.82266e-08
rs3867600	cg15815084	0.0615324	6.85743	6.6241e-11	6.93694e-08
rs2093989	cg00302379	0.0228325	6.85431	6.74479e-11	7.05591e-08
rs2345568	cg20406979	-0.0423001	-6.85379	6.76497e-11	7.06959e-08
rs4759187	cg01297684	0.0496434	6.85233	6.82256e-11	7.12231e-08
rs9426568	cg02280892	0.0548593	6.85062	6.89048e-11	7.18567e-08
rs9356551	cg20406979	-0.0408039	-6.84588	7.08201e-11	7.36228e-08
rs1951459	cg20406979	-0.0408039	-6.84588	7.08201e-11	7.36228e-08
rs933243	cg20406979	-0.0408039	-6.84588	7.08201e-11	7.36228e-08
rs112383632	cg20406979	-0.0409082	-6.83939	7.35304e-11	7.59957e-08
rs4710154	cg20406979	-0.0409082	-6.83939	7.35304e-11	7.59957e-08
rs2761207	cg19566482	0.0439235	6.83825	7.4017e-11	7.59957e-08
rs407515	cg23216724	0.0469746	6.83807	7.40946e-11	7.59957e-08
rs406095	cg23216724	0.0469746	6.83807	7.40946e-11	7.59957e-08
rs4710160	cg23216724	0.0469746	6.83807	7.40946e-11	7.59957e-08
rs4710161	cg23216724	0.0469746	6.83807	7.40946e-11	7.59957e-08
rs388406	cg23216724	0.0469746	6.83807	7.40946e-11	7.59957e-08
rs430145	cg23216724	0.0469746	6.83807	7.40946e-11	7.59957e-08
rs425039	cg23216724	0.0469746	6.83807	7.40946e-11	7.59957e-08
rs376097	cg23216724	0.0469746	6.83807	7.40946e-11	7.59957e-08
rs424185	cg23216724	0.0469746	6.83807	7.40946e-11	7.59957e-08
rs400837	cg23216724	0.0469746	6.83807	7.40946e-11	7.59957e-08
rs10769148	cg03700417	-0.0554981	-6.83545	7.5224e-11	7.69955e-08
rs10769149	cg03700417	-0.0554981	-6.83545	7.5224e-11	7.69955e-08
rs5020450	cg27246571	-0.0552939	-6.8294	7.78973e-11	7.96499e-08
rs9457270	cg20406979	0.0432787	6.82716	7.89119e-11	8.06045e-08
rs521448	cg19070398	-0.0471133	-6.82656	7.91891e-11	8.08014e-08
rs400063	cg23216724	-0.0462742	-6.82621	7.9348e-11	8.08014e-08
rs1794700	cg23216724	-0.0462742	-6.82621	7.9348e-11	8.08014e-08
rs77241275	cg20406979	-0.0412851	-6.82094	8.17999e-11	8.3213e-08
rs1157786	cg03700417	-0.0557673	-6.81317	8.55495e-11	8.69386e-08
rs11959553	cg06726471	0.0400111	6.80919	8.75372e-11	8.88679e-08
rs4899161	cg00302379	0.0236007	6.80664	8.88346e-11	9.00932e-08
rs1341334	cg02280892	0.0543253	6.80573	8.93033e-11	9.02927e-08
rs1341335	cg02280892	0.0543253	6.80573	8.93033e-11	9.02927e-08
rs2570368	cg02280892	0.0543253	6.80573	8.93033e-11	9.02927e-08
rs4755992	cg03700417	-0.055844	-6.80248	9.09909e-11	9.19057e-08
rs67495946	cg09152259	0.0455912	6.80175	9.13751e-11	9.22002e-08
rs71646317	cg08928926	0.0571239	6.79302	9.6086e-11	9.68556e-08
rs9893344	cg12229367	0.0234217	6.78619	9.99354e-11	1.00634e-07
rs7156617	cg00302379	0.0235175	6.7815	1.02673e-10	1.03286e-07
rs2757041	cg20406979	-0.0412318	-6.77584	1.06066e-10	1.06592e-07
rs2695238	cg02280892	0.0543193	6.77201	1.08428e-10	1.08746e-07
rs1341333	cg02280892	0.0543193	6.77201	1.08428e-10	1.08746e-07
rs55842986	cg06726471	0.046912	6.76772	1.11136e-10	1.11014e-07
rs55790738	cg06726471	0.046912	6.76772	1.11136e-10	1.11014e-07
rs60744736	cg06726471	0.046912	6.76772	1.11136e-10	1.11014e-07
rs2910905	cg06726471	0.046912	6.76772	1.11136e-10	1.11014e-07
rs56227241	cg06726471	0.0476458	6.76193	1.14893e-10	1.14653e-07
rs12615166	cg02893324	-0.0492456	-6.76125	1.15344e-10	1.14987e-07
rs439553	cg23216724	-0.0459784	-6.75822	1.17365e-10	1.16886e-07
rs12949688	cg12229367	0.023856	6.75183	1.21748e-10	1.2113e-07
rs1568277	cg09152259	0.0463628	6.74921	1.23591e-10	1.2284e-07
rs1488667	cg03700417	-0.0547173	-6.74404	1.27308e-10	1.26409e-07
rs7956370	cg27246571	-0.0529486	-6.74356	1.2766e-10	1.26632e-07
rs702465	cg12777002	0.0400775	6.73404	1.34812e-10	1.33593e-07
rs9891076	cg23470227	-0.0355611	-6.73333	1.35361e-10	1.34004e-07
rs4755988	cg03700417	-0.0545546	-6.73005	1.37934e-10	1.36415e-07
rs1019512	cg06726471	0.0391219	6.72926	1.38559e-10	1.36897e-07
rs4902359	cg00302379	0.0234304	6.72821	1.39394e-10	1.37586e-07
rs6983152	cg19750024	-0.0275566	-6.71847	1.4738e-10	1.45325e-07
rs2695239	cg02280892	0.0542232	6.71678	1.4881e-10	1.46589e-07
rs4710176	cg20406979	0.0411052	6.70806	1.56413e-10	1.53919e-07
rs1858550	cg02280892	0.0544005	6.70789	1.5656e-10	1.53919e-07
rs2570369	cg02280892	0.0542781	6.70459	1.59547e-10	1.56239e-07
rs2136875	cg02280892	0.0542781	6.70459	1.59547e-10	1.56239e-07
rs2695240	cg02280892	0.0542781	6.70459	1.59547e-10	1.56239e-07
rs2570370	cg02280892	0.0542781	6.70459	1.59547e-10	1.56239e-07
rs8008095	cg00302379	-0.0234939	-6.70314	1.60872e-10	1.57382e-07
rs1530869	cg03700417	-0.0544906	-6.70167	1.62222e-10	1.58392e-07
rs2198153	cg03700417	-0.0544906	-6.70167	1.62222e-10	1.58392e-07
rs2199048	cg23470227	-0.0366767	-6.69614	1.67428e-10	1.63302e-07
rs7152277	cg00302379	-0.0234506	-6.69592	1.67635e-10	1.63302e-07
rs10753426	cg02280892	0.061727	6.69581	1.67744e-10	1.63302e-07
rs7158239	cg00302379	-0.0234477	-6.69496	1.68557e-10	1.63614e-07
rs8011585	cg00302379	-0.0234477	-6.69496	1.68557e-10	1.63614e-07
rs8015921	cg00302379	-0.0234477	-6.69496	1.68557e-10	1.63614e-07
rs2071431	cg06040542	-0.036225	-6.69192	1.71505e-10	1.66313e-07
rs7150646	cg00302379	0.0234736	6.69058	1.72825e-10	1.67268e-07
rs4902357	cg00302379	0.0234736	6.69058	1.72825e-10	1.67268e-07
rs8006419	cg00302379	-0.0223143	-6.68521	1.78196e-10	1.72132e-07
rs7155454	cg00302379	-0.0223143	-6.68521	1.78196e-10	1.72132e-07
rs387733	cg23216724	0.0462369	6.68093	1.82596e-10	1.76211e-07
rs712208	cg16119449	0.0554091	6.67743	1.86279e-10	1.79592e-07
rs8075002	cg02433148	0.0339438	6.67418	1.89759e-10	1.82769e-07
rs4076073	cg23470227	-0.0348789	-6.6734	1.90601e-10	1.83403e-07
rs2427645	cg16586538	0.0504317	6.65934	2.06478e-10	1.98297e-07
rs2534822	cg16586538	0.0504317	6.65934	2.06478e-10	1.98297e-07
rs10928765	cg09152259	0.0456381	6.6538	2.13076e-10	2.0424e-07
rs62160265	cg09152259	0.0456381	6.6538	2.13076e-10	2.0424e-07
rs9624048	cg06040542	-0.037127	-6.65098	2.16521e-10	2.06548e-07
rs9624049	cg06040542	-0.037127	-6.65098	2.16521e-10	2.06548e-07
rs9624051	cg06040542	-0.037127	-6.65098	2.16521e-10	2.06548e-07
rs5759635	cg06040542	-0.037127	-6.65098	2.16521e-10	2.06548e-07
rs5751607	cg06040542	-0.037127	-6.65098	2.16521e-10	2.06548e-07
rs305077	cg22873414	0.036363	6.65019	2.17499e-10	2.07283e-07
rs1044059	cg23216724	0.0461419	6.64371	2.25654e-10	2.14849e-07
rs36103648	cg02893324	-0.0484914	-6.64207	2.27758e-10	2.16644e-07
rs6887245	cg06726471	0.045624	6.6415	2.28496e-10	2.16932e-07
rs62360772	cg06726471	0.045624	6.6415	2.28496e-10	2.16932e-07
rs56206837	cg06726471	0.0375829	6.63457	2.37666e-10	2.25424e-07
rs2665957	cg23470227	-0.035013	-6.63095	2.4259e-10	2.29875e-07
rs34184001	cg00302379	0.0220937	6.62994	2.43994e-10	2.30986e-07
rs59928617	cg05840754	-0.079591	-6.62918	2.45042e-10	2.31757e-07
rs7218498	cg23470227	-0.0349458	-6.61878	2.59924e-10	2.45366e-07
rs2608880	cg23470227	-0.0349458	-6.61878	2.59924e-10	2.45366e-07
rs1858548	cg02280892	0.0542113	6.61802	2.61047e-10	2.4596e-07
rs1858549	cg02280892	0.0542113	6.61802	2.61047e-10	2.4596e-07
rs8137846	cg06040542	-0.0370049	-6.61254	2.69269e-10	2.53467e-07
rs3682	cg23470227	-0.0353736	-6.61124	2.71262e-10	2.55103e-07
rs2046046	cg17430199	-0.0425892	-6.61055	2.7232e-10	2.55855e-07
rs1019129	cg15361247	0.0389117	6.60252	2.84973e-10	2.67491e-07
rs4793912	cg12229367	0.0224388	6.60091	2.87591e-10	2.69694e-07
rs2292980	cg22873414	0.0363175	6.59671	2.94487e-10	2.75901e-07
rs12691486	cg08928926	0.0540629	6.59619	2.95363e-10	2.75979e-07
rs2963977	cg06726471	0.0392761	6.59556	2.96417e-10	2.75979e-07
rs11959574	cg06726471	0.0373847	6.59554	2.96454e-10	2.75979e-07
rs62363268	cg06726471	0.0373847	6.59554	2.96454e-10	2.75979e-07
rs4307102	cg06726471	0.0373847	6.59554	2.96454e-10	2.75979e-07
rs4075638	cg06726471	0.0373847	6.59554	2.96454e-10	2.75979e-07
rs1079991	cg16586538	0.0483262	6.5955	2.9651e-10	2.75979e-07
rs8138361	cg06040542	-0.0370314	-6.58512	3.14425e-10	2.92381e-07
rs2071433	cg06040542	-0.0367149	-6.58134	3.21195e-10	2.97042e-07
rs13086609	cg15361247	0.038692	6.58093	3.2195e-10	2.97042e-07
rs2673062	cg15361247	0.038692	6.58093	3.2195e-10	2.97042e-07
rs2673032	cg15361247	0.0386289	6.57855	3.26298e-10	2.97042e-07
rs2673031	cg15361247	0.0386289	6.57855	3.26298e-10	2.97042e-07
rs2742394	cg15361247	0.0386289	6.57855	3.26298e-10	2.97042e-07
rs2673030	cg15361247	0.0386289	6.57855	3.26298e-10	2.97042e-07
rs2742395	cg15361247	0.0386289	6.57855	3.26298e-10	2.97042e-07
rs2673029	cg15361247	0.0386289	6.57855	3.26298e-10	2.97042e-07
rs2742398	cg15361247	0.0386289	6.57855	3.26298e-10	2.97042e-07
rs2064063	cg15361247	0.0386289	6.57855	3.26298e-10	2.97042e-07
rs2064064	cg15361247	0.0386289	6.57855	3.26298e-10	2.97042e-07
rs2064062	cg15361247	0.0386289	6.57855	3.26298e-10	2.97042e-07
rs2742448	cg15361247	0.0386289	6.57855	3.26298e-10	2.97042e-07
rs2742449	cg15361247	0.0386289	6.57855	3.26298e-10	2.97042e-07
rs2742453	cg15361247	0.0386289	6.57855	3.26298e-10	2.97042e-07
rs2742455	cg15361247	0.0386289	6.57855	3.26298e-10	2.97042e-07
rs2742458	cg15361247	0.0386289	6.57855	3.26298e-10	2.97042e-07
rs1468542	cg15361247	0.0386289	6.57855	3.26298e-10	2.97042e-07
rs2742372	cg15361247	0.0386289	6.57855	3.26298e-10	2.97042e-07
rs2742374	cg15361247	0.0386289	6.57855	3.26298e-10	2.97042e-07
rs2742375	cg15361247	0.0386289	6.57855	3.26298e-10	2.97042e-07
rs11547070;rs67739766;rs796745954;rs397714906	cg15361247	0.0386289	6.57855	3.26298e-10	2.97042e-07
rs2666003	cg23470227	-0.0347544	-6.57481	3.33259e-10	3.03102e-07
rs2742370	cg15361247	0.0386648	6.57336	3.35993e-10	3.0531e-07
rs2673066	cg15361247	0.0385875	6.56421	3.53789e-10	3.18286e-07
rs2531755	cg15361247	0.0385875	6.56421	3.53789e-10	3.18286e-07
rs2673055	cg15361247	0.0385875	6.56421	3.53789e-10	3.18286e-07
rs2253979	cg15361247	0.0385875	6.56421	3.53789e-10	3.18286e-07
rs11709306	cg15361247	0.0385875	6.56421	3.53789e-10	3.18286e-07
rs9826208	cg15361247	0.0385875	6.56421	3.53789e-10	3.18286e-07
rs2742464	cg15361247	0.0385875	6.56421	3.53789e-10	3.18286e-07
rs7631818	cg15361247	0.0385875	6.56421	3.53789e-10	3.18286e-07
rs6807438	cg15361247	0.0385875	6.56421	3.53789e-10	3.18286e-07
rs13059502	cg15361247	0.0385875	6.56421	3.53789e-10	3.18286e-07
rs2742371	cg15361247	0.0385875	6.56421	3.53789e-10	3.18286e-07
rs726668	cg00302379	-0.02235	-6.5632	3.55791e-10	3.19798e-07
rs9675156	cg23470227	-0.034689	-6.55966	3.6296e-10	3.25361e-07
rs6501843	cg23470227	-0.034689	-6.55966	3.6296e-10	3.25361e-07
rs4788913	cg23470227	-0.034689	-6.55966	3.6296e-10	3.25361e-07
rs11627485	cg00302379	0.0228389	6.55779	3.66804e-10	3.28512e-07
rs75468875	cg23747839	-0.0393177	-6.55659	3.69293e-10	3.30444e-07
rs10852766	cg23470227	-0.034682	-6.55611	3.70286e-10	3.31034e-07
rs9674966	cg23470227	-0.0351155	-6.55595	3.70618e-10	3.31034e-07
rs12435835	cg00302379	-0.0207902	-6.55163	3.79749e-10	3.38886e-07
rs1135640	cg23470227	-0.0346308	-6.55039	3.8241e-10	3.40955e-07
rs56248937	cg23470227	-0.0344613	-6.54889	3.85655e-10	3.43541e-07
rs17737199	cg16609459	-0.0401883	-6.54617	3.91598e-10	3.48212e-07
rs4762293	cg16609459	-0.0401883	-6.54617	3.91598e-10	3.48212e-07
rs4075637	cg06726471	0.0371812	6.54201	4.00866e-10	3.56135e-07
rs10928766	cg09152259	0.044428	6.53651	4.13457e-10	3.66729e-07
rs1568279	cg09152259	0.0454127	6.53632	4.13895e-10	3.66729e-07
rs62160266	cg09152259	0.0454127	6.53632	4.13895e-10	3.66729e-07
rs55997706	cg16609459	-0.0401562	-6.5337	4.20035e-10	3.71508e-07
rs73223927	cg16609459	-0.0401562	-6.5337	4.20035e-10	3.71508e-07
rs2285147	cg20406979	0.039938	6.52977	4.29398e-10	3.79452e-07
rs12131153	cg08928926	0.052873	6.5289	4.31511e-10	3.80982e-07
rs12479451	cg19070398	0.0459197	6.52571	4.39316e-10	3.86502e-07
rs6086014	cg19070398	0.0459197	6.52571	4.39316e-10	3.86502e-07
rs6086019	cg19070398	0.0459197	6.52571	4.39316e-10	3.86502e-07
rs2224270	cg19070398	0.0459197	6.52571	4.39316e-10	3.86502e-07
rs2742463	cg15361247	0.0386259	6.52055	4.52219e-10	3.97503e-07
rs3760128	cg23470227	-0.0351866	-6.51545	4.65339e-10	4.08675e-07
rs35033486	cg06726471	0.0439562	6.50952	4.81065e-10	4.22113e-07
rs11948747	cg06726471	0.0452679	6.50276	4.99632e-10	4.38019e-07
rs3769157	cg02893324	-0.042862	-6.50093	5.0479e-10	4.42152e-07
rs2781375	cg00302379	-0.0225873	-6.49298	5.27746e-10	4.61853e-07
rs62160287	cg09152259	0.0448721	6.48845	5.41295e-10	4.73295e-07
rs56023660	cg16609459	-0.0398688	-6.48577	5.49472e-10	4.80023e-07
rs11900469	cg09152259	0.0444091	6.48141	5.63024e-10	4.91431e-07
rs9895947	cg23470227	-0.0348472	-6.47991	5.67774e-10	4.95066e-07
rs8005829	cg00302379	-0.0225228	-6.47978	5.68183e-10	4.95066e-07
rs2071436	cg06040542	-0.0376599	-6.47823	5.73129e-10	4.9894e-07
rs4762297	cg16609459	-0.0398685	-6.4725	5.91765e-10	5.14713e-07
rs56215869	cg06726471	0.0395453	6.46963	6.01316e-10	5.22564e-07
rs8068749	cg23470227	-0.0347776	-6.46655	6.11755e-10	5.31172e-07
rs4605081	cg00302379	-0.020606	-6.46011	6.34144e-10	5.50132e-07
rs7155275	cg00302379	-0.0206018	-6.45806	6.41423e-10	5.55963e-07
rs13029949	cg02893324	-0.0462778	-6.45325	6.58845e-10	5.69577e-07
rs71417423	cg02893324	-0.0462778	-6.45325	6.58845e-10	5.69577e-07
rs12998711	cg02893324	-0.0462778	-6.45325	6.58845e-10	5.69577e-07
rs10151162	cg00302379	-0.0226183	-6.45189	6.63874e-10	5.69626e-07
rs6662763	cg23747839	-0.0385707	-6.45108	6.66861e-10	5.69626e-07
rs4658148	cg23747839	-0.0385707	-6.45108	6.66861e-10	5.69626e-07
rs11804939	cg23747839	-0.0385707	-6.45108	6.66861e-10	5.69626e-07
rs10922617	cg23747839	-0.0385707	-6.45108	6.66861e-10	5.69626e-07
rs10801729	cg23747839	-0.0385707	-6.45108	6.66861e-10	5.69626e-07
rs1957948	cg00302379	-0.0226151	-6.45067	6.68402e-10	5.69626e-07
rs942626	cg00302379	-0.0226151	-6.45067	6.68402e-10	5.69626e-07
rs7159443	cg00302379	-0.0226151	-6.45067	6.68402e-10	5.69626e-07
rs8010213	cg00302379	-0.0226151	-6.45067	6.68402e-10	5.69626e-07
rs1998688	cg00302379	-0.0226151	-6.45067	6.68402e-10	5.69626e-07
rs1256417	cg00302379	-0.0226151	-6.45067	6.68402e-10	5.69626e-07
rs1124752	cg00302379	-0.0226151	-6.45067	6.68402e-10	5.69626e-07
rs2781373	cg00302379	-0.0226147	-6.45061	6.68626e-10	5.69626e-07
rs2781374	cg00302379	-0.0226147	-6.45061	6.68626e-10	5.69626e-07
rs1953232	cg00302379	-0.0226147	-6.45061	6.68626e-10	5.69626e-07
rs2763888	cg00302379	-0.0226147	-6.45061	6.68626e-10	5.69626e-07
rs9624050	cg06040542	-0.0378471	-6.4485	6.76512e-10	5.75852e-07
rs2467100	cg23470227	-0.0346372	-6.44779	6.79218e-10	5.77662e-07
rs11939254	cg27569037	0.0504181	6.44726	6.81228e-10	5.78877e-07
rs7607690	cg11878712	0.0451423	6.44563	6.8743e-10	5.83649e-07
rs433191	cg23216724	0.0454393	6.44363	6.95143e-10	5.89695e-07
rs35410051	cg00302379	-0.0227149	-6.44211	7.01041e-10	5.94192e-07
rs56413023	cg06726471	0.0371545	6.4365	7.23285e-10	6.12525e-07
rs386708492;rs115898938	cg17501210	-0.0989868	-6.43259	7.39167e-10	6.25442e-07
rs2673075	cg15361247	0.038044	6.42805	7.58065e-10	6.40888e-07
rs1270074	cg00302379	-0.0227637	-6.4198	7.93656e-10	6.70409e-07
rs4902360	cg00302379	-0.0227538	-6.41606	8.10282e-10	6.83294e-07
rs1271582	cg00302379	-0.0227538	-6.41606	8.10282e-10	6.83294e-07
rs35520739	cg00302379	-0.0224738	-6.41291	8.24609e-10	6.94238e-07
rs2151755	cg00302379	-0.0224699	-6.41285	8.24877e-10	6.94238e-07
rs7185022	cg22873414	-0.0360217	-6.41274	8.25351e-10	6.94238e-07
rs942628	cg00302379	-0.0225878	-6.41191	8.29179e-10	6.96869e-07
rs10201047	cg09152259	0.044853	6.40928	8.41354e-10	7.06505e-07
rs7134580	cg16609459	-0.0394608	-6.40695	8.52323e-10	7.12712e-07
rs1982221	cg16609459	-0.0394608	-6.40695	8.52323e-10	7.12712e-07
rs1899044	cg16609459	-0.0394608	-6.40695	8.52323e-10	7.12712e-07
rs141043350	cg16609459	-0.0394608	-6.40695	8.52323e-10	7.12712e-07
rs73229022	cg16609459	-0.0394608	-6.40695	8.52323e-10	7.12712e-07
rs13004212	cg02893324	-0.0467971	-6.40487	8.62197e-10	7.20363e-07
rs7134030	cg16609459	-0.0395282	-6.40218	8.75179e-10	7.30597e-07
rs942629	cg00302379	-0.0222796	-6.4018	8.76993e-10	7.31498e-07
rs9302994	cg23470227	-0.0348571	-6.39682	9.01576e-10	7.51374e-07
rs2524222	cg16586538	0.0372347	6.39591	9.06132e-10	7.54539e-07
rs2757042	cg23216724	0.0449879	6.39473	9.12063e-10	7.58843e-07
rs7536471	cg08928926	0.0484201	6.39377	9.16912e-10	7.62241e-07
rs2180465	cg19070398	0.0442356	6.39096	9.31282e-10	7.73541e-07
rs55872768	cg23470227	-0.0343861	-6.39016	9.35442e-10	7.76349e-07
rs34346314	cg19750024	-0.0293647	-6.38999	9.36304e-10	7.76418e-07
rs571462992;rs1270073	cg00302379	-0.0224542	-6.38963	9.38213e-10	7.77354e-07
rs61241561	cg06726471	0.0375961	6.38812	9.46082e-10	7.83222e-07
rs2305913	cg23470227	-0.0336209	-6.37767	1.00237e-09	8.2913e-07
rs147445348	cg09152259	0.0450709	6.37557	1.01407e-09	8.38115e-07
rs1124751	cg00302379	0.0223054	6.37453	1.01994e-09	8.42261e-07
rs34459643	cg00302379	0.0220465	6.3702	1.04467e-09	8.61973e-07
rs7958080	cg16609459	-0.039245	-6.36627	1.06759e-09	8.80158e-07
rs2068208	cg06726471	0.0441142	6.36539	1.07278e-09	8.83705e-07
rs2877263	cg06726471	0.0368872	6.36222	1.09173e-09	8.98568e-07
rs2280378	cg22873414	0.0352204	6.36181	1.0942e-09	8.99854e-07
rs9674908	cg23470227	-0.0350721	-6.35466	1.13829e-09	9.35342e-07
rs147668505;rs201687792;rs201693487;rs386820039;rs55675235	cg06040542	-0.0366833	-6.35068	1.16351e-09	9.5449e-07
rs147668505;rs201687792;rs386820039;rs200959762;rs56254210	cg06040542	-0.0366833	-6.35068	1.16351e-09	9.5449e-07
rs55716817	cg20859453	0.0887911	6.3503	1.16599e-09	9.54954e-07
rs62551155	cg20859453	0.0887911	6.3503	1.16599e-09	9.54954e-07
rs35352238	cg25690897	-0.0460141	-6.34953	1.17096e-09	9.58237e-07
rs1042337	cg09017117	0.0395082	6.34821	1.17952e-09	9.64447e-07
rs35175134	cg06726471	0.0423158	6.34087	1.2282e-09	1.00097e-06
rs13172839	cg06726471	0.0423158	6.34087	1.2282e-09	1.00097e-06
rs13186757	cg06726471	0.0423158	6.34087	1.2282e-09	1.00097e-06
rs11952984	cg06726471	0.0423158	6.34087	1.2282e-09	1.00097e-06
rs62551157	cg20859453	0.0887488	6.33867	1.24316e-09	1.01233e-06
rs3744015	cg23470227	-0.0343983	-6.33841	1.24494e-09	1.01259e-06
rs6086016	cg19070398	0.0443374	6.33833	1.24551e-09	1.01259e-06
rs113841236	cg20859453	0.0880162	6.33634	1.2592e-09	1.02288e-06
rs12750816	cg08928926	0.0487812	6.33188	1.29053e-09	1.04748e-06
rs11620955	cg00302379	-0.0208983	-6.32977	1.30562e-09	1.05822e-06
rs1123329	cg06726471	0.0370292	6.32973	1.30589e-09	1.05822e-06
rs4434059	cg19070398	0.0443018	6.3292	1.30972e-09	1.06046e-06
rs12481089	cg19070398	0.0442579	6.32697	1.32586e-09	1.07092e-06
rs1120554	cg19070398	0.0442579	6.32697	1.32586e-09	1.07092e-06
rs1120555	cg19070398	0.0442579	6.32697	1.32586e-09	1.07092e-06
rs4820542	cg06040542	-0.0358279	-6.32549	1.33675e-09	1.07884e-06
rs2071435	cg06040542	-0.0338887	-6.31922	1.38365e-09	1.11578e-06
rs3754744	cg02893324	-0.0454817	-6.31733	1.39807e-09	1.1265e-06
rs142772497	cg16609459	-0.0390139	-6.31521	1.41444e-09	1.13602e-06
rs7314551	cg16609459	-0.0390139	-6.31521	1.41444e-09	1.13602e-06
rs73227396	cg16609459	-0.0390139	-6.31521	1.41444e-09	1.13602e-06
rs7138597	cg16609459	-0.0390139	-6.31521	1.41444e-09	1.13602e-06
rs7355659	cg09152259	0.0384284	6.30523	1.49412e-09	1.19904e-06
rs72905080	cg02893324	-0.0452506	-6.30444	1.50062e-09	1.19943e-06
rs12986917	cg02893324	-0.0452506	-6.30444	1.50062e-09	1.19943e-06
rs17302977	cg02893324	-0.0452506	-6.30444	1.50062e-09	1.19943e-06
rs12997078	cg02893324	-0.0452506	-6.30444	1.50062e-09	1.19943e-06
rs3769194	cg02893324	-0.0452506	-6.30444	1.50062e-09	1.19943e-06
rs11868308	cg23470227	-0.0402121	-6.30235	1.51793e-09	1.21229e-06
rs11948227	cg06726471	0.037877	6.30163	1.52399e-09	1.21421e-06
rs56270170	cg06726471	0.037877	6.30163	1.52399e-09	1.21421e-06
rs57425852	cg06726471	0.037877	6.30163	1.52399e-09	1.21421e-06
rs6538704	cg16609459	-0.03897	-6.2993	1.54356e-09	1.22881e-06
rs4344319	cg23747839	-0.0378973	-6.29895	1.54657e-09	1.23023e-06
rs10520992	cg06726471	0.0378845	6.29671	1.56571e-09	1.24446e-06
rs12080531	cg08928926	0.0515472	6.2933	1.59519e-09	1.26688e-06
rs3754743	cg02893324	-0.0453021	-6.29271	1.6004e-09	1.27001e-06
rs7533587	cg08928926	0.0447949	6.29145	1.6115e-09	1.2778e-06
rs56193548	cg02893324	-0.0453995	-6.2906	1.61903e-09	1.28172e-06
rs35250703	cg02893324	-0.0453995	-6.2906	1.61903e-09	1.28172e-06
rs4899159	cg00302379	-0.0203446	-6.2898	1.62611e-09	1.28427e-06
rs8012008	cg00302379	-0.0203446	-6.2898	1.62611e-09	1.28427e-06
rs11627531	cg00302379	-0.0203446	-6.2898	1.62611e-09	1.28427e-06
rs828852	cg12777002	0.0389503	6.28809	1.64142e-09	1.29533e-06
rs3087520	cg16609459	-0.0388771	-6.2867	1.65403e-09	1.30425e-06
rs7973968	cg16609459	-0.0393004	-6.28219	1.69534e-09	1.33577e-06
rs2292982	cg22873414	0.0354131	6.28157	1.70109e-09	1.33924e-06
rs4902363	cg00302379	0.0205328	6.2774	1.74046e-09	1.36807e-06
rs11623603	cg00302379	0.0205328	6.2774	1.74046e-09	1.36807e-06
rs3884509	cg06726471	0.0384565	6.27207	1.79194e-09	1.40743e-06
rs12164635	cg08928926	0.0513205	6.2697	1.81528e-09	1.42407e-06
rs2844731	cg16586538	0.0482139	6.26963	1.81599e-09	1.42407e-06
rs12120065	cg08928926	0.0481463	6.2657	1.85544e-09	1.45272e-06
rs36125997	cg08928926	0.0481463	6.2657	1.85544e-09	1.45272e-06
rs11870883	cg23470227	-0.0400293	-6.26066	1.90722e-09	1.49045e-06
rs11087768	cg19070398	0.0444033	6.26015	1.91261e-09	1.49045e-06
rs11087769	cg19070398	0.0444033	6.26015	1.91261e-09	1.49045e-06
rs10854267	cg19070398	0.0444033	6.26015	1.91261e-09	1.49045e-06
rs12625396	cg19070398	0.0444033	6.26015	1.91261e-09	1.49045e-06
rs12624697	cg19070398	0.0444033	6.26015	1.91261e-09	1.49045e-06
rs1866631	cg02893324	0.041618	6.25951	1.91927e-09	1.49447e-06
rs6425724	cg08928926	0.0480125	6.25872	1.92757e-09	1.49976e-06
rs61780094	cg08928926	0.0472842	6.2536	1.98223e-09	1.53988e-06
rs12730052	cg08928926	0.0472842	6.2536	1.98223e-09	1.53988e-06
rs3769187	cg02893324	-0.0450655	-6.25329	1.98559e-09	1.54129e-06
rs2411994	cg00302379	-0.0217031	-6.24902	2.03242e-09	1.57641e-06
rs5751603	cg06040542	-0.0365959	-6.24759	2.04842e-09	1.58266e-06
rs73152620	cg06040542	-0.0365959	-6.24759	2.04842e-09	1.58266e-06
rs73152621	cg06040542	-0.0365959	-6.24759	2.04842e-09	1.58266e-06
rs2267008	cg06040542	-0.0365959	-6.24759	2.04842e-09	1.58266e-06
rs713617	cg06040542	-0.0365959	-6.24759	2.04842e-09	1.58266e-06
rs828887	cg12777002	0.0388186	6.2449	2.07864e-09	1.60476e-06
rs2395296	cg09017117	0.03516	6.24325	2.0974e-09	1.61799e-06
rs4507504	cg06726471	0.0362684	6.2412	2.121e-09	1.63494e-06
rs5759611	cg06040542	-0.0360247	-6.24074	2.1263e-09	1.63775e-06
rs7555730	cg23747839	-0.0387722	-6.2398	2.13733e-09	1.64497e-06
rs1299858	cg02280892	0.0587302	6.23518	2.19176e-09	1.68556e-06
rs11948580	cg06726471	0.0418032	6.23419	2.20359e-09	1.69335e-06
rs928655	cg23747839	-0.037068	-6.23393	2.20674e-09	1.69446e-06
rs17527362	cg06726471	0.0411222	6.23234	2.22596e-09	1.7079e-06
rs36102078	cg02893324	-0.0447465	-6.22848	2.27327e-09	1.74286e-06
rs398278	cg23216724	0.0445731	6.22695	2.29227e-09	1.75608e-06
rs10922620	cg23747839	-0.0387298	-6.22084	2.3698e-09	1.8113e-06
rs6693600	cg23747839	-0.0387298	-6.22084	2.3698e-09	1.8113e-06
rs6698601	cg23747839	-0.0387298	-6.22084	2.3698e-09	1.8113e-06
rs2247325	cg20406979	-0.0387731	-6.22023	2.37772e-09	1.81596e-06
rs4346838	cg23216724	0.044441	6.21949	2.38731e-09	1.82048e-06
rs2345572	cg23216724	0.044441	6.21949	2.38731e-09	1.82048e-06
rs2761206	cg19566482	0.044811	6.21864	2.39827e-09	1.82744e-06
rs62361352	cg06726471	0.0374244	6.21223	2.48338e-09	1.89085e-06
rs34472765	cg02893324	-0.045378	-6.2102	2.511e-09	1.91041e-06
rs57798520	cg06726471	0.0374196	6.20813	2.53936e-09	1.93052e-06
rs6086005	cg19070398	0.0438389	6.20568	2.57346e-09	1.95346e-06
rs6086006	cg19070398	0.0438389	6.20568	2.57346e-09	1.95346e-06
rs3769199	cg02893324	-0.0445992	-6.20283	2.61352e-09	1.98085e-06
rs12989116	cg02893324	-0.0445992	-6.20283	2.61352e-09	1.98085e-06
rs803420	cg16119449	-0.0410043	-6.20234	2.62052e-09	1.98465e-06
rs1667610	cg12777002	0.0383471	6.20074	2.64331e-09	1.99887e-06
rs828891	cg12777002	0.0383471	6.20074	2.64331e-09	1.99887e-06
rs12052293	cg09152259	0.0378412	6.19891	2.66976e-09	2.01733e-06
rs12145697	cg08928926	0.047534	6.18935	2.81192e-09	2.12314e-06
rs2106109	cg06040542	-0.0357547	-6.18893	2.81829e-09	2.12634e-06
rs34702663	cg02893324	-0.0447928	-6.18813	2.83063e-09	2.13242e-06
rs3769192	cg02893324	-0.0447928	-6.18813	2.83063e-09	2.13242e-06
rs9457268	cg20406979	0.0385564	6.17517	3.0364e-09	2.28398e-06
rs6902119	cg20406979	0.0385564	6.17517	3.0364e-09	2.28398e-06
rs11948653	cg06726471	0.0409899	6.16988	3.12469e-09	2.34861e-06
rs10493047	cg08928926	0.0470348	6.16951	3.13099e-09	2.35158e-06
rs2963988	cg06726471	0.038961	6.16916	3.13689e-09	2.35424e-06
rs112064774	cg06040542	-0.0363262	-6.16782	3.15979e-09	2.36785e-06
rs2267009	cg06040542	-0.0363262	-6.16782	3.15979e-09	2.36785e-06
rs13155643	cg06726471	0.0407166	6.16637	3.18454e-09	2.3846e-06
rs377232	cg23216724	-0.0434522	-6.16362	3.23234e-09	2.41346e-06
rs9388712	cg14411190	0.0202747	6.16343	3.2357e-09	2.41346e-06
rs11950388	cg06726471	0.0374614	6.16342	3.23574e-09	2.41346e-06
rs13173184	cg06726471	0.0411217	6.16332	3.23762e-09	2.41346e-06
rs2330956	cg06726471	0.0411217	6.16332	3.23762e-09	2.41346e-06
rs2330955	cg06726471	0.0411217	6.16332	3.23762e-09	2.41346e-06
rs16834397	cg08928926	0.0475272	6.16165	3.26699e-09	2.43172e-06
rs12139997	cg08928926	0.0475272	6.16165	3.26699e-09	2.43172e-06
rs7342	cg23470227	-0.0386364	-6.16067	3.28435e-09	2.44282e-06
rs1667600	cg12777002	0.0378124	6.15776	3.33639e-09	2.47966e-06
rs828893	cg12777002	0.0381001	6.15382	3.40807e-09	2.53023e-06
rs2071432	cg06040542	-0.036135	-6.15375	3.4095e-09	2.53023e-06
rs7024344	cg20859453	0.0848752	6.14957	3.48731e-09	2.58604e-06
rs11585765	cg02280892	0.0571924	6.14735	3.52936e-09	2.61528e-06
rs4239205	cg15815084	0.0578993	6.14607	3.55387e-09	2.63148e-06
rs2910922	cg06726471	0.0388231	6.14022	3.6677e-09	2.71375e-06
rs1150772	cg16586538	0.0466515	6.13709	3.73017e-09	2.75793e-06
rs6886041	cg06726471	0.0410451	6.13561	3.76008e-09	2.77797e-06
rs2571588	cg14411190	0.0201482	6.13225	3.82881e-09	2.82666e-06
rs12987496	cg02893324	-0.0441241	-6.13059	3.86332e-09	2.85003e-06
rs6425726	cg08928926	0.0471272	6.12918	3.8928e-09	2.85275e-06
rs12133730	cg08928926	0.0471272	6.12918	3.8928e-09	2.85275e-06
rs34353623	cg08928926	0.0471272	6.12918	3.8928e-09	2.85275e-06
rs34563758	cg08928926	0.0471272	6.12918	3.8928e-09	2.85275e-06
rs12135033	cg08928926	0.0471272	6.12918	3.8928e-09	2.85275e-06
rs57186798	cg08928926	0.0471272	6.12918	3.8928e-09	2.85275e-06
rs56105061	cg08928926	0.0471272	6.12918	3.8928e-09	2.85275e-06
rs12136523	cg08928926	0.0471272	6.12918	3.8928e-09	2.85275e-06
rs12755701	cg08928926	0.0471272	6.12918	3.8928e-09	2.85275e-06
rs2149093	cg23216724	0.043685	6.12703	3.93796e-09	2.87527e-06
rs444988	cg23216724	0.043685	6.12703	3.93796e-09	2.87527e-06
rs408080	cg23216724	0.043685	6.12703	3.93796e-09	2.87527e-06
rs1794696	cg23216724	0.043685	6.12703	3.93796e-09	2.87527e-06
rs404222	cg23216724	0.043685	6.12703	3.93796e-09	2.87527e-06
rs9612244	cg06040542	-0.035576	-6.12615	3.95672e-09	2.88052e-06
rs5759604	cg06040542	-0.035576	-6.12615	3.95672e-09	2.88052e-06
rs5759607	cg06040542	-0.035576	-6.12615	3.95672e-09	2.88052e-06
rs5759616	cg06040542	-0.035576	-6.12615	3.95672e-09	2.88052e-06
rs3811975	cg06726471	0.0404693	6.1247	3.98772e-09	2.90097e-06
rs7289172	cg06040542	-0.0346341	-6.11646	4.16873e-09	3.03043e-06
rs9997069	cg27569037	0.0384362	6.11343	4.23703e-09	3.07784e-06
rs56178148	cg16609459	-0.0378946	-6.11119	4.28855e-09	3.11299e-06
rs774695918;rs175868	cg16119449	-0.0406904	-6.10916	4.33544e-09	3.14474e-06
rs996122	cg03700417	-0.0503817	-6.10885	4.34288e-09	3.14784e-06
rs175870	cg16119449	-0.0413314	-6.0985	4.59103e-09	3.32529e-06
rs4586342	cg00302379	-0.019504	-6.09275	4.73516e-09	3.42531e-06
rs1727028	cg02280892	0.0558253	6.09265	4.73748e-09	3.42531e-06
rs7148590	cg00302379	-0.0195039	-6.09258	4.73944e-09	3.42531e-06
rs7036684	cg20859453	0.085328	6.09236	4.74486e-09	3.42673e-06
rs34896288	cg06726471	0.0402053	6.09009	4.8031e-09	3.46377e-06
rs10461913	cg06726471	0.0402053	6.09009	4.8031e-09	3.46377e-06
rs9348211	cg23216724	0.0434281	6.086	4.90955e-09	3.52554e-06
rs6920364	cg23216724	0.0434281	6.086	4.90955e-09	3.52554e-06
rs2769352	cg23216724	0.0434281	6.086	4.90955e-09	3.52554e-06
rs1811120	cg23216724	0.0434281	6.086	4.90955e-09	3.52554e-06
rs427824	cg23216724	0.0434281	6.086	4.90955e-09	3.52554e-06
rs364451	cg23216724	0.0432664	6.08599	4.90999e-09	3.52554e-06
rs9292460	cg06726471	0.0380148	6.08504	4.93507e-09	3.54099e-06
rs239934	cg23216724	0.0436011	6.08434	4.95359e-09	3.55173e-06
rs2047068	cg06726471	0.0370203	6.08275	4.99594e-09	3.57951e-06
rs36108975	cg09152259	0.0375137	6.08137	5.03298e-09	3.60346e-06
rs9915572	cg02433148	0.030245	6.07194	5.29377e-09	3.78745e-06
rs9717862	cg23216724	0.0432635	6.05979	5.64944e-09	4.02771e-06
rs17436575	cg06726471	0.0406148	6.05898	5.6738e-09	4.02771e-06
rs62360821	cg06726471	0.0406148	6.05898	5.6738e-09	4.02771e-06
rs1051489	cg06726471	0.0406148	6.05898	5.6738e-09	4.02771e-06
rs10520994	cg06726471	0.0406148	6.05898	5.6738e-09	4.02771e-06
rs11956648	cg06726471	0.0406148	6.05898	5.6738e-09	4.02771e-06
rs10461912	cg06726471	0.0406148	6.05898	5.6738e-09	4.02771e-06
rs4296817	cg06726471	0.0406148	6.05898	5.6738e-09	4.02771e-06
rs71629079	cg06726471	0.0406148	6.05898	5.6738e-09	4.02771e-06
rs62361351	cg06726471	0.0358611	6.05897	5.67406e-09	4.02771e-06
rs4562053	cg06726471	0.0358611	6.05897	5.67406e-09	4.02771e-06
rs512236	cg19070398	-0.044109	-6.05846	5.68973e-09	4.03596e-06
rs9913193	cg02433148	0.029678	6.05171	5.89875e-09	4.18124e-06
rs9903097	cg15815084	0.0436471	6.05033	5.94232e-09	4.20913e-06
rs1533141	cg06900004	-0.0530161	-6.04634	6.07043e-09	4.29682e-06
rs35755171	cg06900004	-0.0530293	-6.04326	6.17081e-09	4.36477e-06
rs34085561	cg06726471	0.0415369	6.0414	6.23263e-09	4.396e-06
rs10461911	cg06726471	0.0415369	6.0414	6.23263e-09	4.396e-06
rs931941	cg06726471	0.0415369	6.0414	6.23263e-09	4.396e-06
rs13171708	cg06726471	0.0415369	6.0414	6.23263e-09	4.396e-06
rs1505571	cg08928926	0.0465653	6.04051	6.26213e-09	4.41369e-06
rs239935	cg23216724	0.0433011	6.03917	6.30719e-09	4.4423e-06
rs4630794	cg12777002	0.0367866	6.03837	6.33406e-09	4.45807e-06
rs3733797	cg09849319	0.0406327	6.03405	6.48156e-09	4.55866e-06
rs12053248	cg09152259	0.0371839	6.02746	6.71327e-09	4.7183e-06
rs67719248	cg02893324	-0.0436526	-6.02664	6.74258e-09	4.73556e-06
rs828861	cg12777002	0.0367124	6.02558	6.7808e-09	4.75905e-06
rs2254828	cg15361247	-0.0344605	-6.0253	6.79113e-09	4.76294e-06
rs714932	cg06726471	0.0403038	6.02226	6.90175e-09	4.82354e-06
rs10941004	cg06726471	0.0403038	6.02226	6.90175e-09	4.82354e-06
rs2331007	cg06726471	0.0403038	6.02226	6.90175e-09	4.82354e-06
rs13190134	cg06726471	0.0403038	6.02226	6.90175e-09	4.82354e-06
rs71629080	cg06726471	0.0403038	6.02226	6.90175e-09	4.82354e-06
rs23544	cg09017117	-0.0318981	-6.01962	6.99941e-09	4.88836e-06
rs6431232	cg09152259	0.0376743	6.01228	7.27826e-09	5.07836e-06
rs7729980	cg06726471	0.0353731	6.01219	7.28166e-09	5.07836e-06
rs2963959	cg06726471	0.0353563	6.00914	7.40099e-09	5.15798e-06
rs34866549	cg06900004	-0.0524817	-6.00542	7.54888e-09	5.25736e-06
rs2176744	cg15815084	0.0433168	5.99999	7.76979e-09	5.40743e-06
rs71324126	cg06900004	-0.0530313	-5.99372	8.0326e-09	5.58643e-06
rs35755253	cg06900004	-0.0530448	-5.99128	8.13749e-09	5.65543e-06
rs11959760	cg06726471	0.0361576	5.99035	8.17775e-09	5.67945e-06
rs2019106	cg06726471	0.0396624	5.98908	8.2328e-09	5.7137e-06
rs664852	cg01355089	0.0398379	5.98581	8.37691e-09	5.80562e-06
rs664524	cg01355089	0.0398379	5.98581	8.37691e-09	5.80562e-06
rs7146939	cg00302379	-0.0207827	-5.98543	8.39377e-09	5.81326e-06
rs2963990	cg06726471	0.0376574	5.9826	8.52049e-09	5.89692e-06
rs13321439	cg06900004	-0.0498444	-5.97997	8.64021e-09	5.9632e-06
rs13321440	cg06900004	-0.0498444	-5.97997	8.64021e-09	5.9632e-06
rs13317815	cg06900004	-0.0498444	-5.97997	8.64021e-09	5.9632e-06
rs34593533	cg06900004	-0.0498444	-5.97997	8.64021e-09	5.9632e-06
rs521527	cg01355089	0.0397932	5.97969	8.65292e-09	5.96783e-06
rs12119245	cg08928926	0.0420888	5.9719	9.01751e-09	6.21499e-06
rs893566	cg15361247	-0.0357282	-5.96885	9.16434e-09	6.31182e-06
rs11950407	cg06726471	0.0361191	5.9667	9.26919e-09	6.37962e-06
rs504418	cg01355089	0.0392018	5.96473	9.36612e-09	6.44188e-06
rs3785472	cg15815084	0.044344	5.96407	9.39903e-09	6.45115e-06
rs8078200	cg15815084	0.044344	5.96407	9.39903e-09	6.45115e-06
rs7209070	cg15815084	0.044344	5.96407	9.39903e-09	6.45115e-06
rs5759624	cg06040542	-0.0352456	-5.96359	9.42295e-09	6.46311e-06
rs8060922	cg02295216	-0.0432254	-5.96005	9.60099e-09	6.58069e-06
rs7160656	cg00302379	-0.0206596	-5.95819	9.69598e-09	6.6407e-06
rs2271898	cg15815084	0.0430584	5.95781	9.71521e-09	6.6407e-06
rs4793835	cg15815084	0.0430584	5.95781	9.71521e-09	6.6407e-06
rs9908291	cg15815084	0.0430584	5.95781	9.71521e-09	6.6407e-06
rs56342397	cg02893324	-0.043427	-5.95707	9.75342e-09	6.66224e-06
rs11675513	cg09152259	0.0367988	5.95645	9.78562e-09	6.67966e-06
rs768514	cg06040542	-0.0352422	-5.95517	9.85209e-09	6.72043e-06
rs60743456	cg06726471	0.0357748	5.95456	9.88368e-09	6.73736e-06
rs8078230	cg15815084	0.0443111	5.95385	9.92092e-09	6.75812e-06
rs4602333	cg06900004	-0.0521306	-5.94875	1.01917e-08	6.93781e-06
rs7541442	cg08928926	0.0449916	5.94834	1.02138e-08	6.94815e-06
rs11218863	cg02763813	-0.0532235	-5.94763	1.02524e-08	6.96965e-06
rs4505967	cg06726471	0.0359325	5.94685	1.02943e-08	6.99333e-06
rs11939388	cg27569037	0.037429	5.94526	1.03813e-08	7.0476e-06
rs62072709	cg15815084	0.0441668	5.94444	1.04262e-08	7.07326e-06
rs2113093	cg06726471	0.0374701	5.94267	1.05244e-08	7.13502e-06
rs72627094	cg06900004	-0.0494468	-5.94117	1.06076e-08	7.16709e-06
rs72627095	cg06900004	-0.0494468	-5.94117	1.06076e-08	7.16709e-06
rs6803587	cg06900004	-0.0494468	-5.94117	1.06076e-08	7.16709e-06
rs6770052	cg06900004	-0.0494468	-5.94117	1.06076e-08	7.16709e-06
rs6778577	cg06900004	-0.0494468	-5.94117	1.06076e-08	7.16709e-06
rs58434466	cg06726471	0.0352999	5.93602	1.08997e-08	7.35944e-06
rs56306930	cg06726471	0.0358518	5.93544	1.09334e-08	7.37221e-06
rs59928961	cg06726471	0.0358518	5.93544	1.09334e-08	7.37221e-06
rs4626351	cg06726471	0.0357124	5.93256	1.11007e-08	7.47992e-06
rs4076873	cg19750024	-0.0272773	-5.93066	1.12121e-08	7.54986e-06
rs398312	cg03703031	0.0407144	5.93035	1.12303e-08	7.55703e-06
rs6875215	cg06726471	0.0357098	5.93009	1.1246e-08	7.55741e-06
rs7718219	cg06726471	0.0357098	5.93009	1.1246e-08	7.55741e-06
rs4466998	cg00302379	-0.0188732	-5.92985	1.126e-08	7.56168e-06
rs11952201	cg06726471	0.0359378	5.92811	1.13638e-08	7.61797e-06
rs59953683	cg06726471	0.0359378	5.92811	1.13638e-08	7.61797e-06
rs12620037	cg09152259	0.0424807	5.92806	1.13668e-08	7.61797e-06
rs3811972	cg06726471	0.0392265	5.925	1.15515e-08	7.73656e-06
rs9905199	cg15815084	0.0427858	5.92427	1.15963e-08	7.75937e-06
rs4794672	cg15815084	0.0430222	5.92382	1.16233e-08	7.75937e-06
rs7218364	cg15815084	0.0430222	5.92382	1.16233e-08	7.75937e-06
rs9893721	cg15815084	0.0430222	5.92382	1.16233e-08	7.75937e-06
rs11954183	cg06726471	0.0407198	5.9238	1.16245e-08	7.75937e-06
rs1678778	cg01355089	0.0389538	5.92317	1.16632e-08	7.78002e-06
rs2047069	cg06726471	0.0358358	5.91934	1.19011e-08	7.93337e-06
rs1567580	cg06900004	-0.0517718	-5.91701	1.2048e-08	8.02054e-06
rs1567579	cg06900004	-0.0517718	-5.91701	1.2048e-08	8.02054e-06
rs56261855	cg09152259	0.0422767	5.91366	1.22619e-08	8.15134e-06
rs12233101	cg09152259	0.0422767	5.91366	1.22619e-08	8.15134e-06
rs13058936	cg09610644	0.0414447	5.91355	1.2269e-08	8.15134e-06
rs11627757	cg00302379	0.0220411	5.91297	1.23062e-08	8.1591e-06
rs3783715	cg00302379	0.0220411	5.91297	1.23062e-08	8.1591e-06
rs7160037	cg00302379	0.0220411	5.91297	1.23062e-08	8.1591e-06
rs3761418	cg06040542	-0.0333932	-5.91274	1.23216e-08	8.1591e-06
rs112947658	cg06040542	-0.0333932	-5.91274	1.23216e-08	8.1591e-06
rs9897258	cg05272827	0.0251619	5.91239	1.23442e-08	8.1686e-06
rs4710181	cg20406979	0.038036	5.91086	1.24439e-08	8.22914e-06
rs11158577	cg00302379	0.0191247	5.90697	1.27009e-08	8.39352e-06
rs2191027	cg15361247	-0.0414101	-5.90487	1.2842e-08	8.48108e-06
rs7534378	cg08928926	0.0446003	5.90105	1.31023e-08	8.64153e-06
rs6683793	cg08928926	0.0446003	5.90105	1.31023e-08	8.64153e-06
rs4794671	cg15815084	0.0427965	5.89976	1.31914e-08	8.67163e-06
rs9907968	cg15815084	0.0427965	5.89976	1.31914e-08	8.67163e-06
rs9902250	cg15815084	0.0427965	5.89976	1.31914e-08	8.67163e-06
rs8067569	cg15815084	0.0427965	5.89976	1.31914e-08	8.67163e-06
rs8067906	cg15815084	0.0427965	5.89976	1.31914e-08	8.67163e-06
rs12520052	cg06726471	0.036693	5.89844	1.32828e-08	8.72318e-06
rs56100618	cg09152259	0.0421317	5.89837	1.32874e-08	8.72318e-06
rs951545	cg08928926	0.0429886	5.89529	1.35044e-08	8.85886e-06
rs55761222	cg06726471	0.0356793	5.89518	1.35118e-08	8.85886e-06
rs6663924	cg08928926	0.0415265	5.89373	1.36154e-08	8.91504e-06
rs1505569	cg08928926	0.0415265	5.89373	1.36154e-08	8.91504e-06
rs13017210	cg02893324	-0.0426208	-5.89278	1.36835e-08	8.95372e-06
rs17015334	cg09152259	0.0422343	5.89165	1.37645e-08	9.00083e-06
rs2540479	cg27246571	-0.0487084	-5.89077	1.38282e-08	9.03655e-06
rs4897953	cg23577001	0.0350884	5.88821	1.40151e-08	9.15265e-06
rs251421	cg17430199	-0.0435861	-5.88788	1.40399e-08	9.16286e-06
rs62360820	cg06726471	0.0366347	5.88636	1.4152e-08	9.19386e-06
rs889318	cg06726471	0.0366347	5.88636	1.4152e-08	9.19386e-06
rs2910931	cg06726471	0.0366347	5.88636	1.4152e-08	9.19386e-06
rs2910882	cg06726471	0.0366347	5.88636	1.4152e-08	9.19386e-06
rs4867441	cg06726471	0.0366347	5.88636	1.4152e-08	9.19386e-06
rs1469105	cg06726471	0.0366347	5.88636	1.4152e-08	9.19386e-06
rs367614	cg06726471	0.0366347	5.88636	1.4152e-08	9.19386e-06
rs6503773	cg15815084	0.0425572	5.8853	1.42308e-08	9.23899e-06
rs2008012	cg23470227	-0.0344441	-5.88451	1.429e-08	9.27143e-06
rs7760495	cg20406979	0.0369783	5.88261	1.44326e-08	9.35785e-06
rs7512096	cg08928926	0.0432391	5.88079	1.45711e-08	9.44145e-06
rs10941005	cg06726471	0.0390467	5.87967	1.46565e-08	9.47828e-06
rs62361570	cg06726471	0.0390467	5.87967	1.46565e-08	9.47828e-06
rs11957618	cg06726471	0.0390467	5.87967	1.46565e-08	9.47828e-06
rs11626499	cg04348689	0.031065	5.87954	1.46666e-08	9.47868e-06
rs577491	cg19070398	-0.0537026	-5.87915	1.46965e-08	9.48906e-06
rs2540484	cg27246571	-0.0483768	-5.87896	1.47112e-08	9.48906e-06
rs2540481	cg27246571	-0.0483768	-5.87896	1.47112e-08	9.48906e-06
rs2660843	cg27246571	-0.0485953	-5.87867	1.47338e-08	9.49743e-06
rs7223066	cg15815084	0.0427431	5.87791	1.47924e-08	9.51675e-06
rs7210030	cg15815084	0.0427431	5.87791	1.47924e-08	9.51675e-06
rs3760157	cg15815084	0.0427431	5.87791	1.47924e-08	9.51675e-06
rs4899160	cg00302379	0.0219235	5.87658	1.48957e-08	9.57083e-06
rs11624169	cg00302379	0.0219235	5.87658	1.48957e-08	9.57083e-06
rs56257952	cg06726471	0.0355886	5.87608	1.49347e-08	9.58355e-06
rs11960898	cg06726471	0.0355886	5.87608	1.49347e-08	9.58355e-06
rs5751602	cg06040542	-0.0332608	-5.87456	1.50543e-08	9.65405e-06
rs7775443	cg20406979	0.0377706	5.86801	1.55792e-08	9.93313e-06
rs4710178	cg20406979	0.0377706	5.86801	1.55792e-08	9.93313e-06
rs4710179	cg20406979	0.0377706	5.86801	1.55792e-08	9.93313e-06
rs4710182	cg20406979	0.0377706	5.86801	1.55792e-08	9.93313e-06
rs4710183	cg20406979	0.0377706	5.86801	1.55792e-08	9.93313e-06
rs10946212	cg20406979	0.0377706	5.86801	1.55792e-08	9.93313e-06
rs10946214	cg20406979	0.0377706	5.86801	1.55792e-08	9.93313e-06
rs10946215	cg20406979	0.0377706	5.86801	1.55792e-08	9.93313e-06
rs2039321	cg20406979	0.0377706	5.86801	1.55792e-08	9.93313e-06
rs56327685	cg09152259	0.0418762	5.86453	1.58653e-08	1.0109e-05
rs58704734	cg08928926	0.041284	5.86329	1.59688e-08	1.01685e-05
rs954748	cg06900004	-0.0517585	-5.86307	1.59875e-08	1.01739e-05
rs12601782	cg15815084	0.0426085	5.86199	1.60774e-08	1.02246e-05
rs9919713	cg25283432	-0.014282	-5.86008	1.62388e-08	1.03009e-05
rs838868	cg25283432	-0.014282	-5.86008	1.62388e-08	1.03009e-05
rs838867	cg25283432	-0.014282	-5.86008	1.62388e-08	1.03009e-05
rs838865	cg25283432	-0.014282	-5.86008	1.62388e-08	1.03009e-05
rs4460688	cg08928926	0.0414071	5.85936	1.63004e-08	1.03334e-05
rs251422	cg17430199	-0.0433994	-5.85723	1.64826e-08	1.04356e-05
rs251424	cg17430199	-0.0433994	-5.85723	1.64826e-08	1.04356e-05
rs506128	cg02280892	0.0524431	5.85602	1.65869e-08	1.0495e-05
rs9902931	cg15815084	0.0425067	5.85302	1.68491e-08	1.06541e-05
rs67000390	cg06726471	0.0357719	5.85231	1.69119e-08	1.06871e-05
rs251425	cg17430199	-0.043489	-5.85092	1.70352e-08	1.07579e-05
rs13095317	cg09610644	0.0406057	5.8508	1.70456e-08	1.07579e-05
rs1566960	cg08928926	0.0386667	5.84896	1.72099e-08	1.08479e-05
rs10798848	cg08928926	0.0386667	5.84896	1.72099e-08	1.08479e-05
rs12567614	cg02280892	0.0475106	5.84715	1.73735e-08	1.0944e-05
rs11801168	cg02280892	0.047673	5.84635	1.74461e-08	1.09828e-05
rs9911132	cg15815084	0.0424646	5.84591	1.74858e-08	1.10008e-05
rs1967425	cg09152259	0.0335593	5.84082	1.7957e-08	1.12902e-05
rs113379819	cg23577001	0.0347303	5.83925	1.81046e-08	1.13686e-05
rs2121143	cg23577001	0.0347303	5.83925	1.81046e-08	1.13686e-05
rs2660844	cg27246571	-0.0484496	-5.8375	1.82706e-08	1.14656e-05
rs555766	cg19208876	-0.0359495	-5.8372	1.82984e-08	1.14758e-05
rs13030174	cg09494379	-0.0272759	-5.83644	1.83718e-08	1.15146e-05
rs202135955;rs777721667;rs62282550;rs778246735;rs770729762	cg09610644	0.0389566	5.83442	1.8566e-08	1.1629e-05
rs35457462	cg06900004	-0.0476311	-5.83102	1.88976e-08	1.18292e-05
rs9366089	cg20406979	0.0377348	5.83001	1.89969e-08	1.1884e-05
rs12122001	cg08928926	0.0448363	5.8272	1.92776e-08	1.20444e-05
rs6685250	cg08928926	0.0448363	5.8272	1.92776e-08	1.20444e-05
rs33917597	cg08928926	0.044077	5.82537	1.9462e-08	1.21368e-05
rs12118473	cg08928926	0.044077	5.82537	1.9462e-08	1.21368e-05
rs12123798	cg08928926	0.044077	5.82537	1.9462e-08	1.21368e-05
rs251427	cg17430199	-0.0435357	-5.8252	1.9479e-08	1.21398e-05
rs3788356	cg06040542	-0.0329347	-5.82369	1.96327e-08	1.22279e-05
rs1040261	cg15815084	0.042579	5.8235	1.96523e-08	1.22325e-05
rs35282812	cg15815084	0.0422477	5.82282	1.97221e-08	1.22343e-05
rs8074637	cg15815084	0.0422477	5.82282	1.97221e-08	1.22343e-05
rs9911560	cg15815084	0.0422477	5.82282	1.97221e-08	1.22343e-05
rs3826295	cg15815084	0.0422477	5.82282	1.97221e-08	1.22343e-05
rs8071009	cg15815084	0.0422477	5.82282	1.97221e-08	1.22343e-05
rs13171366	cg06726471	0.038708	5.82275	1.9729e-08	1.22343e-05
rs2574796	cg19208876	-0.0358982	-5.82088	1.99225e-08	1.23466e-05
rs71629078	cg06726471	0.0386806	5.81535	2.05033e-08	1.26987e-05
rs12097884	cg08928926	0.0387334	5.81384	2.06653e-08	1.27911e-05
rs4820541	cg06040542	-0.0335049	-5.81086	2.09873e-08	1.29823e-05
rs12724265	cg08928926	0.0383351	5.80249	2.19198e-08	1.35507e-05
rs2673068	cg15361247	0.0340496	5.80146	2.2037e-08	1.36147e-05
rs10946213	cg20406979	0.0376064	5.79932	2.22837e-08	1.37586e-05
rs1992554	cg15815084	0.0421732	5.79901	2.23198e-08	1.37724e-05
rs4662748	cg09152259	0.0375517	5.79786	2.24531e-08	1.3846e-05
rs3743716	cg02295216	-0.0427593	-5.79435	2.28658e-08	1.40918e-05
rs4949371	cg08928926	0.0397035	5.79176	2.31744e-08	1.42731e-05
rs7765739	cg20406979	0.0367896	5.79038	2.33408e-08	1.43667e-05
rs11727868	cg27569037	0.036892	5.79008	2.33777e-08	1.43806e-05
rs3935253	cg06900004	-0.0507847	-5.78489	2.40145e-08	1.47632e-05
rs7652042	cg15361247	-0.037304	-5.78447	2.40664e-08	1.47859e-05
rs10496663	cg09152259	0.0414666	5.78373	2.41598e-08	1.48342e-05
rs10914347	cg08928926	0.0389463	5.78175	2.44083e-08	1.49775e-05
rs7774396	cg20406979	0.0365366	5.77992	2.46407e-08	1.51109e-05
rs6503774	cg15815084	0.0419459	5.77512	2.52609e-08	1.54152e-05
rs3959524	cg15815084	0.0419459	5.77512	2.52609e-08	1.54152e-05
rs9899453	cg15815084	0.0419459	5.77512	2.52609e-08	1.54152e-05
rs7225346	cg15815084	0.0419459	5.77512	2.52609e-08	1.54152e-05
rs3760158	cg15815084	0.0419459	5.77512	2.52609e-08	1.54152e-05
rs9913602	cg15815084	0.0419459	5.77512	2.52609e-08	1.54152e-05
rs2049061	cg15815084	0.0419459	5.77512	2.52609e-08	1.54152e-05
rs2049062	cg15815084	0.0419459	5.77512	2.52609e-08	1.54152e-05
rs112236066	cg09849319	0.0399247	5.7726	2.55917e-08	1.55358e-05
rs11690086	cg09152259	0.0413172	5.77255	2.55989e-08	1.55358e-05
rs12053309	cg09152259	0.0413172	5.77255	2.55989e-08	1.55358e-05
rs10928769	cg09152259	0.0413172	5.77255	2.55989e-08	1.55358e-05
rs11682864	cg09152259	0.0413172	5.77255	2.55989e-08	1.55358e-05
rs3732205	cg09152259	0.0413172	5.77255	2.55989e-08	1.55358e-05
rs2288655	cg09152259	0.0413172	5.77255	2.55989e-08	1.55358e-05
rs12616200	cg09152259	0.0413172	5.77255	2.55989e-08	1.55358e-05
rs11681225	cg09152259	0.0413172	5.77255	2.55989e-08	1.55358e-05
rs9457273	cg20406979	0.0364857	5.77182	2.56951e-08	1.55847e-05
rs62156576	cg09152259	0.0415236	5.77055	2.58654e-08	1.56784e-05
rs11129128	cg06900004	-0.0499786	-5.76473	2.66551e-08	1.61473e-05
rs7642375	cg09610644	0.0389018	5.76334	2.6847e-08	1.62537e-05
rs13004906	cg09152259	0.0372521	5.76253	2.69591e-08	1.63116e-05
rs1956459	cg01751040	0.020674	5.76089	2.71892e-08	1.64408e-05
rs6741675	cg02893324	-0.0403923	-5.75948	2.73877e-08	1.65508e-05
rs725131	cg02295216	-0.0424985	-5.75598	2.78865e-08	1.68421e-05
rs204293	cg20406979	-0.036271	-5.7517	2.85098e-08	1.71658e-05
rs10946211	cg20406979	-0.036271	-5.7517	2.85098e-08	1.71658e-05
rs7749827	cg20406979	-0.036271	-5.7517	2.85098e-08	1.71658e-05
rs9364891	cg20406979	-0.036271	-5.7517	2.85098e-08	1.71658e-05
rs477568	cg19208876	-0.0360948	-5.75159	2.8526e-08	1.71658e-05
rs482422	cg19208876	-0.0360948	-5.75159	2.8526e-08	1.71658e-05
rs13015157	cg09152259	0.0374032	5.7511	2.8598e-08	1.71988e-05
rs930139	cg09152259	0.0371929	5.74997	2.87664e-08	1.72896e-05
rs13022800	cg02893324	-0.0410254	-5.74847	2.89894e-08	1.74026e-05
rs67422536	cg02893324	-0.0410254	-5.74847	2.89894e-08	1.74026e-05
rs62156572	cg09152259	0.0411075	5.74594	2.93701e-08	1.76197e-05
rs35998242	cg08928926	0.0388702	5.74583	2.93864e-08	1.76197e-05
rs13006453	cg09152259	0.0371679	5.74519	2.94843e-08	1.76465e-05
rs10928775	cg09152259	0.0371679	5.74519	2.94843e-08	1.76465e-05
rs12052284	cg09152259	0.0371679	5.74519	2.94843e-08	1.76465e-05
rs9897759	cg15815084	0.0418082	5.74359	2.97273e-08	1.77812e-05
rs878366	cg02280892	0.0461192	5.74043	3.02162e-08	1.80629e-05
rs34773782	cg04348689	0.0307223	5.73921	3.04062e-08	1.81655e-05
rs2249692	cg06040542	-0.0332635	-5.73736	3.06984e-08	1.83181e-05
rs9612251	cg06040542	-0.0332635	-5.73736	3.06984e-08	1.83181e-05
rs10914374	cg08928926	0.0380145	5.73594	3.09236e-08	1.84415e-05
rs10075910	cg06726471	0.0360406	5.73198	3.15596e-08	1.88006e-05
rs3783721	cg00302379	0.0212894	5.73196	3.15636e-08	1.88006e-05
rs34746219	cg08928926	0.0442146	5.72826	3.21703e-08	1.91163e-05
rs12141835	cg08928926	0.0442146	5.72826	3.21703e-08	1.91163e-05
rs35282110	cg08928926	0.0442146	5.72826	3.21703e-08	1.91163e-05
rs61780773	cg08928926	0.0442146	5.72826	3.21703e-08	1.91163e-05
rs4663114	cg09152259	0.0331422	5.72305	3.30444e-08	1.96239e-05
rs10853015	cg27023597	-0.0394535	-5.7192	3.3704e-08	2.00037e-05
rs5759638	cg06040542	-0.0308407	-5.71862	3.38043e-08	2.00513e-05
rs6638	cg22873414	-0.0316815	-5.71752	3.39963e-08	2.01532e-05
rs628573	cg19070398	-0.0528995	-5.71662	3.41545e-08	2.0235e-05
rs1672879	cg25283432	-0.0144945	-5.71418	3.45848e-08	2.04777e-05
rs165281	cg14164816	0.0377182	5.71366	3.4678e-08	2.05207e-05
rs868119094;rs398120022	cg23470227	-0.0337613	-5.7132	3.47599e-08	2.05569e-05
rs533584	cg19208876	-0.0360517	-5.71059	3.52289e-08	2.08185e-05
rs68600	cg09017117	-0.0302567	-5.7105	3.5244e-08	2.08185e-05
rs74749044	cg17927313	-0.0153805	-5.71023	3.52938e-08	2.08193e-05
rs72986421	cg23577001	0.0340567	5.71003	3.5329e-08	2.08193e-05
rs7251926	cg23577001	0.0340567	5.71003	3.5329e-08	2.08193e-05
rs4897952	cg23577001	0.0340567	5.71003	3.5329e-08	2.08193e-05
rs6672651	cg08928926	0.0440049	5.70289	3.66491e-08	2.15845e-05
rs6677172	cg02280892	0.0459806	5.70201	3.68135e-08	2.16556e-05
rs10915986	cg02280892	0.0459806	5.70201	3.68135e-08	2.16556e-05
rs11637329	cg17927313	-0.0153744	-5.69997	3.72004e-08	2.18703e-05
rs6425729	cg08928926	0.0438458	5.69805	3.75693e-08	2.19705e-05
rs12131841	cg08928926	0.0438458	5.69805	3.75693e-08	2.19705e-05
rs7542403	cg08928926	0.0438458	5.69805	3.75693e-08	2.19705e-05
rs7555364	cg08928926	0.0438458	5.69805	3.75693e-08	2.19705e-05
rs7513215	cg08928926	0.0438458	5.69805	3.75693e-08	2.19705e-05
rs34556466	cg08928926	0.0438458	5.69805	3.75693e-08	2.19705e-05
rs61779439	cg08928926	0.0438458	5.69805	3.75693e-08	2.19705e-05
rs7556591	cg08928926	0.0438458	5.69805	3.75693e-08	2.19705e-05
rs35068862	cg08928926	0.0438458	5.69805	3.75693e-08	2.19705e-05
rs251420	cg17430199	-0.0415562	-5.69609	3.79495e-08	2.21798e-05
rs705092	cg09152259	0.0368831	5.69487	3.81868e-08	2.23054e-05
rs10928774	cg09152259	0.0368846	5.69395	3.83662e-08	2.23708e-05
rs12053039	cg09152259	0.0368846	5.69395	3.83662e-08	2.23708e-05
rs12052654	cg09152259	0.0368846	5.69395	3.83662e-08	2.23708e-05
rs8177177	cg13238348	0.0306314	5.69351	3.84543e-08	2.24091e-05
rs17261964	cg09152259	0.0368629	5.68958	3.92351e-08	2.28374e-05
rs11691981	cg09152259	0.0368629	5.68958	3.92351e-08	2.28374e-05
rs9863176	cg06900004	-0.0475058	-5.68927	3.92981e-08	2.28607e-05
rs4794673	cg15815084	0.0421195	5.68589	3.99839e-08	2.3246e-05
rs8040326	cg17927313	-0.0154175	-5.68465	4.02385e-08	2.33804e-05
rs7193473	cg02295216	-0.0414218	-5.68368	4.04378e-08	2.34825e-05
rs251418	cg17430199	-0.0426527	-5.68339	4.04979e-08	2.35037e-05
rs10474500	cg17430199	-0.042058	-5.68299	4.05819e-08	2.35387e-05
rs11648480	cg27208925	-0.0359896	-5.68237	4.0711e-08	2.35999e-05
rs11084956	cg23577001	0.0338662	5.68179	4.08315e-08	2.36285e-05
rs11883060	cg23577001	0.0338662	5.68179	4.08315e-08	2.36285e-05
rs11879189	cg23577001	0.0338662	5.68179	4.08315e-08	2.36285e-05
rs324433	cg06726471	0.0352035	5.67325	4.2655e-08	2.46694e-05
rs7254312	cg05840754	-0.0630524	-5.67295	4.27203e-08	2.46785e-05
rs114578504	cg05840754	-0.0630524	-5.67295	4.27203e-08	2.46785e-05
rs9837939	cg06900004	-0.0487752	-5.67106	4.31345e-08	2.49033e-05
rs11633478	cg17927313	-0.0153407	-5.67044	4.32707e-08	2.49675e-05
rs113828774	cg17927313	-0.0153111	-5.67028	4.33068e-08	2.49738e-05
rs903203	cg22873414	0.0337917	5.66995	4.33787e-08	2.50008e-05
rs251419	cg17430199	-0.0415039	-5.66532	4.4417e-08	2.55844e-05
rs9809225	cg06900004	-0.0467327	-5.66152	4.52874e-08	2.60707e-05
rs165005	cg14164816	0.0349637	5.66114	4.53763e-08	2.61068e-05
rs1503960	cg04348689	0.0339981	5.66014	4.56085e-08	2.62253e-05
rs55675018	cg17927313	-0.0152977	-5.65378	4.7112e-08	2.70741e-05
rs3130642	cg16586538	0.030494	5.65338	4.7208e-08	2.71136e-05
rs35414948	cg09610644	0.0387879	5.65144	4.76765e-08	2.7367e-05
rs12993290	cg09494379	-0.0258839	-5.65131	4.77095e-08	2.73701e-05
rs13025791	cg09152259	0.0359409	5.64904	4.82632e-08	2.75601e-05
rs761938012;rs13025959	cg09152259	0.0359409	5.64904	4.82632e-08	2.75601e-05
rs975822	cg20406979	-0.0359753	-5.64875	4.83352e-08	2.75601e-05
rs55869686	cg17927313	-0.0152588	-5.6486	4.83728e-08	2.75601e-05
rs112729666	cg17927313	-0.0152588	-5.6486	4.83728e-08	2.75601e-05
rs11638669	cg17927313	-0.0152588	-5.6486	4.83728e-08	2.75601e-05
rs4777615	cg17927313	-0.0152588	-5.6486	4.83728e-08	2.75601e-05
rs113749270	cg17927313	-0.0152588	-5.6486	4.83728e-08	2.75601e-05
rs79793025	cg17927313	-0.0152588	-5.6486	4.83728e-08	2.75601e-05
rs56184999	cg17927313	-0.0152588	-5.6486	4.83728e-08	2.75601e-05
rs75454665	cg17927313	-0.0152588	-5.6486	4.83728e-08	2.75601e-05
rs79385562	cg17927313	-0.0152588	-5.6486	4.83728e-08	2.75601e-05
rs2540495	cg27246571	-0.0348627	-5.6479	4.85434e-08	2.76415e-05
rs5751596	cg06040542	-0.033246	-5.64514	4.9233e-08	2.80181e-05
rs1684048	cg17927313	-0.0151881	-5.64266	4.9858e-08	2.83195e-05
rs1719288	cg17927313	-0.0151881	-5.64266	4.9858e-08	2.83195e-05
rs6679005	cg08928926	0.0374473	5.64265	4.98598e-08	2.83195e-05
rs1110650	cg15361247	-0.0342914	-5.64259	4.98763e-08	2.83195e-05
rs6663779	cg08928926	0.038236	5.64214	4.99909e-08	2.83362e-05
rs7533537	cg08928926	0.038236	5.64214	4.99909e-08	2.83362e-05
rs16834408	cg08928926	0.038236	5.64214	4.99909e-08	2.83362e-05
rs7246029	cg23577001	0.0338569	5.63697	5.13239e-08	2.90752e-05
rs3766287	cg08928926	0.0386789	5.63665	5.14073e-08	2.91058e-05
rs4949377	cg08928926	0.0384962	5.63301	5.23673e-08	2.96252e-05
rs17102423	cg00302379	0.0184277	5.63295	5.23841e-08	2.96252e-05
rs12150106	cg15815084	0.0425511	5.6299	5.32019e-08	3.00536e-05
rs12150100	cg15815084	0.0425511	5.6299	5.32019e-08	3.00536e-05
rs45604339	cg00302379	0.0207725	5.62077	5.57265e-08	3.14619e-05
rs2404529	cg09152259	0.0331175	5.61323	5.79028e-08	3.26721e-05
rs8071655	cg12582317	0.0367943	5.61198	5.82712e-08	3.28613e-05
rs4481157	cg13238348	0.0304374	5.60942	5.90312e-08	3.32711e-05
rs10914357	cg08928926	0.0378994	5.60678	5.9827e-08	3.37005e-05
rs1565222	cg03700417	-0.0467674	-5.6042	6.06137e-08	3.41243e-05
rs2540496	cg27246571	-0.0345541	-5.59695	6.28802e-08	3.53803e-05
rs6658828	cg08928926	0.0369645	5.59536	6.3388e-08	3.5646e-05
rs1684036	cg17927313	-0.015057	-5.59063	6.4926e-08	3.64902e-05
rs12977108	cg25690897	-0.0348113	-5.58977	6.52081e-08	3.66281e-05
rs2292165	cg08928926	0.0383403	5.58732	6.60224e-08	3.70646e-05
rs2078517	cg15815084	0.041209	5.58421	6.70667e-08	3.76296e-05
rs2898863	cg00302379	0.0199107	5.58276	6.7559e-08	3.78845e-05
rs10211291	cg09152259	0.0317671	5.58074	6.82521e-08	3.82516e-05
rs365228	cg03703031	0.0384667	5.58032	6.83979e-08	3.83118e-05
rs572093	cg19208876	-0.0355882	-5.57878	6.89339e-08	3.85903e-05
rs10404014	cg25690897	-0.0366898	-5.57228	7.12341e-08	3.98556e-05
rs1659561	cg03703031	-0.0421661	-5.57166	7.14548e-08	3.99567e-05
rs543057;rs112400634	cg12368752	-0.0239527	-5.56329	7.45352e-08	4.16558e-05
rs11880770	cg23577001	0.0337742	5.55866	7.62975e-08	4.26168e-05
rs1158789	cg01751040	0.0207001	5.55798	7.65593e-08	4.2739e-05
rs66748093	cg15361247	-0.0339223	-5.55733	7.68079e-08	4.28538e-05
rs11038480	cg03700417	-0.0461568	-5.55333	7.83742e-08	4.37032e-05
rs701107	cg25283432	-0.014171	-5.55185	7.89594e-08	4.40049e-05
rs11684148	cg09152259	0.0356205	5.54618	8.12426e-08	4.50774e-05
rs2152351	cg23747839	-0.0341116	-5.54618	8.1246e-08	4.50774e-05
rs2152352	cg23747839	-0.0341116	-5.54618	8.1246e-08	4.50774e-05
rs972314	cg23747839	-0.0341116	-5.54618	8.1246e-08	4.50774e-05
rs972315	cg23747839	-0.0341116	-5.54618	8.1246e-08	4.50774e-05
rs7511795	cg23747839	-0.0341116	-5.54618	8.1246e-08	4.50774e-05
rs9427975	cg23747839	-0.0341116	-5.54618	8.1246e-08	4.50774e-05
rs9427976	cg23747839	-0.0341116	-5.54618	8.1246e-08	4.50774e-05
rs12145450	cg08928926	0.0365016	5.54445	8.1954e-08	4.54449e-05
rs4658354	cg23747839	-0.0341097	-5.54389	8.21847e-08	4.55221e-05
rs4658359	cg23747839	-0.0341097	-5.54389	8.21847e-08	4.55221e-05
rs8004805	cg00302379	0.0190985	5.54325	8.24504e-08	4.56439e-05
rs11108372	cg27246571	-0.0332294	-5.54295	8.25752e-08	4.56876e-05
rs12999051	cg09494379	-0.0255527	-5.54232	8.28365e-08	4.58067e-05
rs3093023	cg20406979	0.0344544	5.54033	8.36679e-08	4.62408e-05
rs11626156	cg00302379	0.0194123	5.53709	8.50411e-08	4.69737e-05
rs11622158	cg04348689	0.033179	5.53655	8.5276e-08	4.70773e-05
rs7048739	cg08562586	-0.044721	-5.53608	8.5474e-08	4.71605e-05
rs1956458	cg01751040	0.0203021	5.53578	8.56058e-08	4.72071e-05
rs4902361	cg00302379	0.0198042	5.53372	8.64948e-08	4.76709e-05
rs13170957	cg17430199	-0.0439227	-5.52848	8.8799e-08	4.89138e-05
rs332186	cg06097048	0.0488738	5.52767	8.9161e-08	4.90589e-05
rs332187	cg06097048	0.0488738	5.52767	8.9161e-08	4.90589e-05
rs1568391	cg22873414	-0.0309188	-5.52516	9.02911e-08	4.96533e-05
rs10777769	cg27246571	-0.0338683	-5.52447	9.06075e-08	4.97998e-05
rs2863700	cg03700417	-0.0458457	-5.52338	9.11022e-08	5.00227e-05
rs2345568	cg23216724	-0.0396591	-5.52336	9.11136e-08	5.00227e-05
rs2757041	cg23216724	-0.0390231	-5.5229	9.13222e-08	5.01096e-05
rs34853270	cg02893324	-0.0397831	-5.52174	9.18544e-08	5.03739e-05
rs11906812	cg20918393	0.017113	5.51904	9.31057e-08	5.1032e-05
rs67606949	cg06900004	-0.0469336	-5.51816	9.35181e-08	5.12299e-05
rs6580191	cg12695286	0.0252455	5.51342	9.57662e-08	5.24325e-05
rs868814	cg00302379	0.0193285	5.51237	9.62714e-08	5.26802e-05
rs4412577	cg23747839	-0.0339271	-5.51214	9.63806e-08	5.26821e-05
rs4265414	cg23747839	-0.0339271	-5.51214	9.63806e-08	5.26821e-05
rs4575068	cg23747839	-0.0339375	-5.51097	9.69484e-08	5.29634e-05
rs901900	cg03700417	-0.0459651	-5.51065	9.71061e-08	5.30204e-05
rs7144259	cg00302379	0.0212711	5.51006	9.73922e-08	5.31475e-05
rs7222776	cg10241823	0.0314579	5.50936	9.77326e-08	5.33041e-05
rs12694890	cg09494379	-0.0254191	-5.50656	9.9115e-08	5.40284e-05
rs34400805	cg08928926	0.037389	5.50459	1.00095e-07	5.4533e-05
rs58363746	cg23470227	-0.032763	-5.50445	1.00167e-07	5.45423e-05
rs6808958	cg15361247	-0.0335934	-5.50399	1.00396e-07	5.46369e-05
rs17015274	cg09152259	0.0402231	5.50306	1.00866e-07	5.4863e-05
rs165284	cg14164816	0.0364175	5.50191	1.01446e-07	5.51483e-05
rs779433451;rs201368033;rs12452575;rs71160283	cg13074526	-0.0327312	-5.49847	1.03207e-07	5.56019e-05
rs34329423	cg08928926	0.0364062	5.49832	1.03286e-07	5.56019e-05
rs34030940	cg08928926	0.0364062	5.49832	1.03286e-07	5.56019e-05
rs35610147	cg08928926	0.0364062	5.49832	1.03286e-07	5.56019e-05
rs35033009	cg08928926	0.0364062	5.49832	1.03286e-07	5.56019e-05
rs10914371	cg08928926	0.0364062	5.49832	1.03286e-07	5.56019e-05
rs10798847	cg08928926	0.0364062	5.49832	1.03286e-07	5.56019e-05
rs2377784	cg08928926	0.0364062	5.49832	1.03286e-07	5.56019e-05
rs6698579	cg08928926	0.0364062	5.49832	1.03286e-07	5.56019e-05
rs12117387	cg08928926	0.0364062	5.49832	1.03286e-07	5.56019e-05
rs6665949	cg08928926	0.0364062	5.49832	1.03286e-07	5.56019e-05
rs905928	cg08928926	0.0364062	5.49832	1.03286e-07	5.56019e-05
rs905926	cg08928926	0.0364062	5.49832	1.03286e-07	5.56019e-05
rs7534392	cg08928926	0.0364062	5.49832	1.03286e-07	5.56019e-05
rs7534465	cg08928926	0.0364062	5.49832	1.03286e-07	5.56019e-05
rs6425745	cg08928926	0.0364062	5.49832	1.03286e-07	5.56019e-05
rs6425746	cg08928926	0.0364062	5.49832	1.03286e-07	5.56019e-05
rs1505572	cg08928926	0.0364062	5.49832	1.03286e-07	5.56019e-05
rs10892916	cg02763813	-0.0511304	-5.49816	1.03367e-07	5.56157e-05
rs150112	cg20406979	0.0336999	5.49749	1.03712e-07	5.5771e-05
rs7551345	cg08928926	0.0365772	5.49502	1.05002e-07	5.64343e-05
rs3783720	cg00302379	0.0204813	5.49262	1.06268e-07	5.7084e-05
rs1982661	cg17430199	0.0341105	5.49235	1.06412e-07	5.71306e-05
rs12122184	cg08928926	0.0363667	5.49105	1.07106e-07	5.74719e-05
rs762810	cg00302379	0.0203925	5.48923	1.08085e-07	5.79664e-05
rs1995585	cg08928926	0.0364472	5.48857	1.08438e-07	5.80618e-05
rs2377785	cg08928926	0.0364472	5.48857	1.08438e-07	5.80618e-05
rs7515829	cg08928926	0.0364472	5.48857	1.08438e-07	5.80618e-05
rs3788357	cg06040542	-0.0321259	-5.48676	1.09424e-07	5.85584e-05
rs6519421	cg06040542	-0.0304925	-5.4855	1.10113e-07	5.8858e-05
rs7105537	cg12368752	0.0244344	5.48541	1.10162e-07	5.8858e-05
rs7110261	cg12368752	0.0244344	5.48541	1.10162e-07	5.8858e-05
rs4867439	cg06726471	0.034804	5.48459	1.10617e-07	5.90696e-05
rs10058172	cg09849319	0.030914	5.48292	1.11544e-07	5.95325e-05
rs11644411	cg27208925	-0.0346637	-5.48192	1.12102e-07	5.97986e-05
rs4458403	cg15361247	-0.033468	-5.47961	1.13397e-07	6.04243e-05
rs4682791	cg15361247	-0.033468	-5.47961	1.13397e-07	6.04243e-05
rs11575078	cg20406979	0.0326568	5.47921	1.13626e-07	6.04903e-05
rs4704405	cg17430199	-0.0433229	-5.47918	1.13642e-07	6.04903e-05
rs12122236	cg08928926	0.0362843	5.47823	1.14181e-07	6.06479e-05
rs10753249	cg08928926	0.0362843	5.47823	1.14181e-07	6.06479e-05
rs7517314	cg08928926	0.0362843	5.47823	1.14181e-07	6.06479e-05
rs61780780	cg08928926	0.0362843	5.47823	1.14181e-07	6.06479e-05
rs7030384	cg08562586	-0.0439793	-5.47167	1.17974e-07	6.2629e-05
rs2757039	cg23216724	-0.038514	-5.47155	1.18049e-07	6.26354e-05
rs10982592	cg08562586	-0.0438133	-5.47143	1.18118e-07	6.26384e-05
rs970114	cg17430199	-0.0434999	-5.47037	1.18743e-07	6.2903e-05
rs6453297	cg17430199	-0.0434999	-5.47037	1.18743e-07	6.2903e-05
rs34687290	cg08928926	0.0363242	5.46828	1.19984e-07	6.35269e-05
rs9892659	cg15815084	0.0404731	5.46618	1.2125e-07	6.41629e-05
rs114737875	cg08928926	0.0365543	5.46597	1.21375e-07	6.41951e-05
rs151353	cg15402265	-0.0237969	-5.46458	1.22216e-07	6.46055e-05
rs7225024	cg27023597	-0.0381562	-5.46426	1.22415e-07	6.46762e-05
rs3795432	cg08928926	0.0363103	5.46303	1.23163e-07	6.5037e-05
rs332152	cg06097048	0.0483889	5.46215	1.23704e-07	6.52879e-05
rs6035463	cg20918393	0.0169104	5.45941	1.25404e-07	6.615e-05
rs1522748	cg17927313	-0.0151947	-5.45918	1.25547e-07	6.61904e-05
rs9391973	cg03703031	-0.0410692	-5.45891	1.25717e-07	6.62098e-05
rs9392436	cg03703031	-0.0410692	-5.45891	1.25717e-07	6.62098e-05
rs2247315	cg23216724	-0.0381247	-5.45653	1.27211e-07	6.69614e-05
rs4902364	cg00302379	0.0190492	5.45334	1.29245e-07	6.79247e-05
rs8015330	cg00302379	0.0190492	5.45334	1.29245e-07	6.79247e-05
rs11627859	cg00302379	0.0190492	5.45334	1.29245e-07	6.79247e-05
rs1319577	cg01751040	0.0238942	5.4493	1.31865e-07	6.92646e-05
rs10982497	cg08562586	-0.0361908	-5.44831	1.32514e-07	6.95689e-05
rs12058198	cg08928926	0.0361115	5.44816	1.32613e-07	6.95841e-05
rs165006	cg14164816	0.0344393	5.44415	1.35282e-07	7.09473e-05
rs9895763	cg23470227	-0.0354648	-5.44298	1.3607e-07	7.13231e-05
rs332146	cg06097048	0.0484302	5.44213	1.36645e-07	7.1587e-05
rs10733091	cg23747839	-0.0336982	-5.44047	1.37774e-07	7.21404e-05
rs7255060	cg05840754	-0.0594054	-5.43672	1.4036e-07	7.34377e-05
rs10145378	cg01751040	0.0203516	5.43667	1.40399e-07	7.34377e-05
rs9457274	cg20406979	0.0330193	5.43389	1.42344e-07	7.44161e-05
rs12279100	cg02763813	-0.0503453	-5.432	1.4369e-07	7.50406e-05
rs1986554	cg02763813	-0.0503453	-5.432	1.4369e-07	7.50406e-05
rs4658360	cg23747839	-0.0334604	-5.43166	1.43932e-07	7.51276e-05
rs6911766	cg20406979	-0.0347824	-5.43118	1.44269e-07	7.52643e-05
rs865576	cg17927313	-0.0147257	-5.42879	1.4599e-07	7.61221e-05
rs12145953	cg08928926	0.035993	5.42846	1.46227e-07	7.61261e-05
rs4949391	cg08928926	0.035993	5.42846	1.46227e-07	7.61261e-05
rs12562824	cg08928926	0.035993	5.42846	1.46227e-07	7.61261e-05
rs1531615	cg17430199	0.0334421	5.42791	1.46626e-07	7.62942e-05
rs9459835	cg23216724	0.0377577	5.42661	1.47577e-07	7.67487e-05
rs1990611	cg27246571	-0.0322807	-5.42216	1.50863e-07	7.8417e-05
rs424244	cg03703031	0.0377001	5.42093	1.51782e-07	7.88533e-05
rs391525	cg22873414	0.0310292	5.4152	1.56147e-07	8.10788e-05
rs12586312	cg04348689	0.0269685	5.41439	1.56776e-07	8.13629e-05
rs332158	cg06097048	0.047851	5.41028	1.59994e-07	8.29895e-05
rs2772435	cg06097048	0.0477529	5.40734	1.62335e-07	8.32074e-05
rs2807759	cg06097048	0.0477529	5.40734	1.62335e-07	8.32074e-05
rs332121	cg06097048	0.0477529	5.40734	1.62335e-07	8.32074e-05
rs332124	cg06097048	0.0477529	5.40734	1.62335e-07	8.32074e-05
rs332126	cg06097048	0.0477529	5.40734	1.62335e-07	8.32074e-05
rs332128	cg06097048	0.0477529	5.40734	1.62335e-07	8.32074e-05
rs231202	cg06097048	0.0477529	5.40734	1.62335e-07	8.32074e-05
rs332131	cg06097048	0.0477529	5.40734	1.62335e-07	8.32074e-05
rs332134	cg06097048	0.0477529	5.40734	1.62335e-07	8.32074e-05
rs332137	cg06097048	0.0477529	5.40734	1.62335e-07	8.32074e-05
rs332139	cg06097048	0.0477529	5.40734	1.62335e-07	8.32074e-05
rs332140	cg06097048	0.0477529	5.40734	1.62335e-07	8.32074e-05
rs332142	cg06097048	0.0477529	5.40734	1.62335e-07	8.32074e-05
rs332143	cg06097048	0.0477529	5.40734	1.62335e-07	8.32074e-05
rs332154	cg06097048	0.0477529	5.40734	1.62335e-07	8.32074e-05
rs332156	cg06097048	0.0477529	5.40734	1.62335e-07	8.32074e-05
rs332161	cg06097048	0.0477529	5.40734	1.62335e-07	8.32074e-05
rs332162	cg06097048	0.0477529	5.40734	1.62335e-07	8.32074e-05
rs332168	cg06097048	0.0477529	5.40734	1.62335e-07	8.32074e-05
rs332172	cg06097048	0.0477529	5.40734	1.62335e-07	8.32074e-05
rs332177	cg06097048	0.0477529	5.40734	1.62335e-07	8.32074e-05
rs332178	cg06097048	0.0477529	5.40734	1.62335e-07	8.32074e-05
rs332183	cg06097048	0.0477529	5.40734	1.62335e-07	8.32074e-05
rs1357370	cg17927313	-0.0146731	-5.40242	1.66327e-07	8.52093e-05
rs56024005	cg03700417	-0.0501562	-5.40069	1.67754e-07	8.58961e-05
rs17570409	cg17430199	0.0336861	5.39537	1.72219e-07	8.811e-05
rs2145175	cg01751040	0.0221454	5.39533	1.72254e-07	8.811e-05
rs4776250	cg17927313	-0.0146609	-5.39443	1.73019e-07	8.84559e-05
rs832884	cg17927313	-0.0147734	-5.39373	1.73617e-07	8.87159e-05
rs896338	cg03700417	-0.0449511	-5.39293	1.74301e-07	8.90199e-05
rs449811	cg03703031	0.0376136	5.38802	1.78579e-07	9.11578e-05
rs8009396	cg00302379	0.0195223	5.38216	1.83806e-07	9.37782e-05
rs10061629	cg17430199	-0.0437379	-5.38083	1.85015e-07	9.43464e-05
rs56016541	cg23470227	-0.0346421	-5.37153	1.93673e-07	9.87109e-05
rs11788513	cg08562586	-0.0360429	-5.36997	1.95168e-07	9.9422e-05
rs6453301	cg17430199	-0.0414156	-5.36797	1.97097e-07	0.000100353
rs332151	cg06097048	0.0475857	5.36776	1.97299e-07	0.000100405
rs6456156	cg20406979	0.0327212	5.36614	1.98879e-07	0.000101157
rs7942122	cg02763813	-0.0512889	-5.36603	1.98983e-07	0.000101158
rs898834	cg02280892	0.047362	5.36372	2.01256e-07	0.000102262
rs6136867	cg20918393	0.0170927	5.35763	2.07363e-07	0.000105311
rs3765703	cg11832534	0.0140841	5.35718	2.07828e-07	0.000105494
rs7173413	cg21727145	-0.0341145	-5.35629	2.08728e-07	0.000105896
rs11792749	cg08562586	-0.0348826	-5.35399	2.11101e-07	0.000107046
rs11915185	cg09610644	0.0326824	5.35277	2.12368e-07	0.000107634
rs4858556	cg06900004	-0.0414572	-5.35246	2.12693e-07	0.000107744
rs1479598	cg17430199	-0.0428042	-5.34942	2.15889e-07	0.000109307
rs1322077	cg23216724	0.0376804	5.34884	2.16505e-07	0.000109563
rs2072512	cg27246571	-0.0318325	-5.34372	2.22002e-07	0.000112288
rs2757053	cg23216724	-0.0375343	-5.34253	2.23299e-07	0.000112829
rs1130033	cg23216724	-0.0375343	-5.34253	2.23299e-07	0.000112829
rs73916894	cg23577001	0.0347603	5.34152	2.2441e-07	0.000113333
rs2540492	cg27246571	-0.0318109	-5.34032	2.25734e-07	0.000113886
rs2540491	cg27246571	-0.0318109	-5.34032	2.25734e-07	0.000113886
rs111852804	cg23470227	-0.0347289	-5.34009	2.2599e-07	0.000113958
rs7134060	cg16609459	-0.0307623	-5.33904	2.2715e-07	0.000114264
rs8009714	cg00302379	0.0193522	5.33871	2.27516e-07	0.000114264
rs884683	cg00302379	0.0193522	5.33871	2.27516e-07	0.000114264
rs12147959	cg00302379	0.0193522	5.33871	2.27516e-07	0.000114264
rs12880781	cg00302379	0.0193522	5.33871	2.27516e-07	0.000114264
rs35769504	cg00302379	0.0193522	5.33871	2.27516e-07	0.000114264
rs11158572	cg00302379	0.0193522	5.33871	2.27516e-07	0.000114264
rs12888794	cg00302379	0.0193522	5.33871	2.27516e-07	0.000114264
rs1978331	cg27246571	-0.0317987	-5.33847	2.27787e-07	0.000114343
rs11625045	cg00302379	0.019338	5.33697	2.29462e-07	0.000114894
rs942627	cg00302379	0.019338	5.33697	2.29462e-07	0.000114894
rs55658675	cg00302379	0.019338	5.33697	2.29462e-07	0.000114894
rs8181939	cg00302379	0.019338	5.33697	2.29462e-07	0.000114894
rs7161394	cg00302379	0.019338	5.33697	2.29462e-07	0.000114894
rs1034087	cg06097048	0.0467432	5.33236	2.34701e-07	0.000117399
rs1272396	cg06097048	0.0467432	5.33236	2.34701e-07	0.000117399
rs12285598	cg19566482	-0.0489788	-5.33192	2.35203e-07	0.000117591
rs1044780	cg04348689	0.0284187	5.32724	2.4065e-07	0.000120254
rs10982504	cg08562586	-0.0356459	-5.32577	2.42383e-07	0.00012106
rs1953228	cg00302379	0.0193329	5.32393	2.44572e-07	0.000122091
rs1825934	cg03700417	-0.0440542	-5.32227	2.46561e-07	0.000123023
rs7761159	cg20406979	0.0323768	5.32001	2.49299e-07	0.000124326
rs9457249	cg23216724	0.0374572	5.31264	2.58432e-07	0.000128752
[truncated: 5,821 more rows]

## Sheet: CD-CpGs in CD-cases FDR
The blood cis-mQTLs detected for 977 CD associated CpGs from Somineni et al. 2019 in CD cases (n=164) alone at FDR level
SNP	CpGs	Estimates	Pvalue
rs571126	cg19070398	-0.0913059	3.65677e-31
rs805883	cg19070398	-0.0910699	8.82385e-31
rs10769150	cg03700417	-0.147386	3.58936e-32
rs570393;rs796963361;rs59562890	cg19070398	0.0754119	1.10897e-21
rs1873057	cg03700417	-0.146441	1.65683e-29
rs608938	cg19070398	0.0749533	1.2902e-21
rs6125883	cg00568296	-0.084967	5.69739e-24
rs34219567	cg10065189	-0.06086	5.45566e-22
rs56245572	cg10065189	-0.06086	5.45566e-22
rs1109279	cg10065189	-0.06086	5.45566e-22
rs2769355	cg20406979	0.0668968	8.82847e-20
rs2757054	cg20406979	0.0668968	8.82847e-20
rs443570	cg20406979	0.0663091	7.36801e-20
rs366938	cg20406979	0.0662958	9.20203e-20
rs1811121	cg20406979	0.0662958	9.20203e-20
rs394522	cg20406979	0.0663091	7.36801e-20
rs10946199	cg20406979	0.0662437	9.90839e-20
rs1819333	cg20406979	0.0663091	7.36801e-20
rs2013815	cg20406979	0.0663091	7.36801e-20
rs2769349	cg20406979	0.0663091	7.36801e-20
rs1187530	cg20406979	0.0663091	7.36801e-20
rs2757050	cg20406979	0.0663091	7.36801e-20
rs1590257	cg20406979	0.0663091	7.36801e-20
rs2769351	cg20406979	0.0663091	7.36801e-20
rs6939196	cg20406979	0.0663091	7.36801e-20
rs2769354	cg20406979	0.0663091	7.36801e-20
rs2757052	cg20406979	0.0663091	7.36801e-20
rs1211447	cg20406979	0.0663091	7.36801e-20
rs1187532	cg20406979	0.0663091	7.36801e-20
rs434093	cg20406979	0.0663091	7.36801e-20
rs448060	cg20406979	0.0663091	7.36801e-20
rs365189	cg20406979	0.0663091	7.36801e-20
rs376551	cg20406979	0.0663091	7.36801e-20
rs386548	cg20406979	0.0663091	7.36801e-20
rs402749	cg20406979	0.0663091	7.36801e-20
rs385863	cg20406979	0.0663091	7.36801e-20
rs397713	cg20406979	0.0663091	7.36801e-20
rs453184	cg20406979	0.0663091	7.36801e-20
rs436707	cg20406979	0.0663091	7.36801e-20
rs442298	cg20406979	0.0663091	7.36801e-20
rs377753	cg20406979	0.0663091	7.36801e-20
rs430477	cg20406979	0.0663091	7.36801e-20
rs376574	cg20406979	0.0663091	7.36801e-20
rs439237	cg20406979	0.0663091	7.36801e-20
rs9457247	cg20406979	0.0663091	7.36801e-20
rs9459827	cg20406979	0.0663091	7.36801e-20
rs1794699	cg20406979	0.0663091	7.36801e-20
rs1743439	cg20406979	0.0663091	7.36801e-20
rs13192426	cg20406979	0.0663091	7.36801e-20
rs13192687	cg20406979	0.0663091	7.36801e-20
rs9717548	cg20406979	0.0663091	7.36801e-20
rs5020533	cg20406979	0.0663091	7.36801e-20
rs1620933	cg20406979	0.0663091	7.36801e-20
rs415987	cg20406979	0.0663091	7.36801e-20
rs1794697	cg20406979	0.0663091	7.36801e-20
rs34560498;rs386708543	cg20406979	0.0663091	7.36801e-20
rs414437	cg20406979	0.0663091	7.36801e-20
rs421214	cg20406979	0.0663091	7.36801e-20
rs422094	cg20406979	0.0663091	7.36801e-20
rs393558	cg20406979	0.0663091	7.36801e-20
rs436625	cg20406979	0.0663091	7.36801e-20
rs408040	cg20406979	0.0663091	7.36801e-20
rs408918	cg20406979	0.0663091	7.36801e-20
rs413232	cg20406979	0.0663091	7.36801e-20
rs86755	cg20406979	0.0663091	7.36801e-20
rs382009	cg20406979	0.0663091	7.36801e-20
rs428805	cg20406979	0.0663091	7.36801e-20
rs2345571	cg20406979	0.0663091	7.36801e-20
rs385460	cg20406979	0.0663091	7.36801e-20
rs385113	cg20406979	0.0663091	7.36801e-20
rs932644	cg20406979	0.0663091	7.36801e-20
rs10946198	cg20406979	0.0663091	7.36801e-20
rs1743440	cg20406979	0.0663091	7.36801e-20
rs1743441	cg20406979	0.0663091	7.36801e-20
rs1794694	cg20406979	0.0663091	7.36801e-20
rs430293	cg20406979	0.0663091	7.36801e-20
rs430097	cg20406979	0.0663091	7.36801e-20
rs409356	cg20406979	0.0663091	7.36801e-20
rs447042	cg20406979	0.0663091	7.36801e-20
rs402191	cg20406979	0.0663091	7.36801e-20
rs1794693	cg20406979	0.0663091	7.36801e-20
rs401260	cg20406979	0.0663091	7.36801e-20
rs422694	cg20406979	0.0663091	7.36801e-20
rs422780	cg20406979	0.0663091	7.36801e-20
rs400176	cg20406979	0.0663091	7.36801e-20
rs422562	cg20406979	0.0663091	7.36801e-20
rs416131	cg20406979	0.0663091	7.36801e-20
rs415890	cg20406979	0.0663091	7.36801e-20
rs415842	cg20406979	0.0663091	7.36801e-20
rs389956	cg20406979	0.0663091	7.36801e-20
rs389946	cg20406979	0.0663091	7.36801e-20
rs401261	cg20406979	0.0663091	7.36801e-20
rs2793381	cg02280892	0.110956	1.24469e-19
rs2015864	cg20406979	0.0662866	9.89525e-20
rs1811123	cg20406979	0.0663693	1.80983e-19
rs364283	cg20406979	0.0660016	7.0565e-20
rs429083	cg20406979	0.0660016	7.0565e-20
rs4710147	cg20406979	0.066069	1.57405e-19
rs2757046	cg20406979	0.066069	1.57405e-19
rs2757047	cg20406979	0.066069	1.57405e-19
rs393727	cg20406979	0.065272	2.4373e-19
rs405553	cg20406979	0.065521	3.5204e-19
rs2345573	cg20406979	0.0651825	4.52535e-19
rs407515	cg20406979	0.0653667	1.9529e-19
rs406095	cg20406979	0.0653667	1.9529e-19
rs4710160	cg20406979	0.0653667	1.9529e-19
rs4710161	cg20406979	0.0653667	1.9529e-19
rs388406	cg20406979	0.0653667	1.9529e-19
rs430145	cg20406979	0.0653667	1.9529e-19
rs425039	cg20406979	0.0653667	1.9529e-19
rs376097	cg20406979	0.0653667	1.9529e-19
rs424185	cg20406979	0.0653667	1.9529e-19
rs400837	cg20406979	0.0653667	1.9529e-19
rs4997107	cg20406979	0.0654367	6.9754e-19
rs2249731	cg02280892	0.102644	2.49872e-17
rs439553	cg20406979	-0.0634344	5.5292e-18
rs2149083	cg20406979	0.06383	2.94391e-18
rs2149084	cg20406979	0.06383	2.94391e-18
rs2769346	cg20406979	0.06383	2.94391e-18
rs2149085	cg20406979	0.06383	2.94391e-18
rs2769347	cg20406979	0.06383	2.94391e-18
rs2769348	cg20406979	0.06383	2.94391e-18
rs2149090	cg20406979	0.06383	2.94391e-18
rs2149091	cg20406979	0.06383	2.94391e-18
rs2149092	cg20406979	0.06383	2.94391e-18
rs444210	cg20406979	-0.0648693	2.25759e-18
rs400063	cg20406979	-0.0626636	1.40474e-17
rs1794700	cg20406979	-0.0626636	1.40474e-17
rs1317170	cg02280892	0.101873	3.52726e-17
rs2570367	cg02280892	0.101873	3.52726e-17
rs2757044	cg20406979	0.0635026	7.25905e-18
rs433191	cg20406979	0.066201	3.84123e-19
rs408087	cg20406979	-0.0626636	1.40474e-17
rs387733	cg20406979	0.0633686	7.66172e-19
rs9900933	cg23470227	-0.0512919	4.52502e-15
rs9903858	cg23470227	-0.0521951	1.89447e-15
rs1047743	cg23470227	-0.0519449	1.75533e-15
rs8069105	cg23470227	-0.0519719	3.96657e-15
rs377232	cg20406979	-0.0629318	2.68388e-17
rs6091092	cg00568296	-0.0943106	1.60824e-12
rs56785718	cg27569037	0.0749929	1.68415e-16
rs7656235	cg27569037	0.0749929	1.68415e-16
rs1076714	cg00568296	-0.080006	1.41285e-16
rs4662721	cg09152259	0.046279	8.51067e-10
rs4662724	cg09152259	0.046279	8.51067e-10
rs12613413	cg09152259	0.0459992	8.16745e-10
rs1044059	cg20406979	0.0600491	2.18108e-15
rs2276683	cg09152259	0.0465284	1.13515e-09
rs2276682	cg09152259	0.0466057	7.85506e-10
rs10769151	cg03700417	-0.126002	4.8779e-18
rs4485425	cg23470227	-0.0503011	5.91164e-14
rs10928764	cg09152259	0.0449812	2.94105e-09
rs2090573	cg09152259	0.0449812	2.94105e-09
rs6430937	cg09152259	0.0442151	1.77574e-09
rs7225724	cg15815084	0.106905	6.14807e-13
rs6503775	cg15815084	0.106905	6.14807e-13
rs4365350	cg15815084	0.106905	6.14807e-13
rs2757042	cg20406979	0.0596347	3.12841e-15
rs11652539	cg23470227	-0.0509647	3.05054e-15
rs11652261	cg23470227	-0.0509647	3.05054e-15
rs73352129	cg23470227	-0.0497196	1.51489e-13
rs67740167	cg23470227	-0.0497196	1.51489e-13
rs78057960	cg23470227	-0.0497196	1.51489e-13
rs8076052	cg23470227	-0.0497196	1.51489e-13
rs2125345;rs558180280	cg23470227	-0.0497196	1.51489e-13
rs13429925	cg09152259	0.0442151	1.77574e-09
rs878371	cg23470227	-0.0478924	6.12519e-14
rs11658385	cg23470227	-0.0480182	6.48169e-14
rs8071825	cg15815084	0.110551	1.23534e-12
rs9892183	cg15815084	0.110551	1.23534e-12
rs7584659	cg09152259	0.0461758	6.40239e-09
rs59027829	cg09152259	0.0445667	1.27757e-09
rs364451	cg20406979	0.0588486	1.33895e-14
rs398278	cg20406979	0.0592554	1.35847e-14
rs28578956	cg23470227	-0.048155	7.20046e-14
rs6095747	cg00568296	-0.0955492	3.10956e-12
rs2238645	cg02370334	-0.0617514	1.11463e-15
rs239935	cg20406979	0.0598447	9.17194e-15
rs1322077	cg20406979	0.0592317	2.45749e-14
rs1135688	cg23470227	-0.0489952	1.783e-14
rs2149093	cg20406979	0.0590021	9.85031e-15
rs444988	cg20406979	0.0590021	9.85031e-15
rs408080	cg20406979	0.0590021	9.85031e-15
rs1794696	cg20406979	0.0590021	9.85031e-15
rs404222	cg20406979	0.0590021	9.85031e-15
rs9457249	cg20406979	0.059116	2.74935e-14
rs9457251	cg20406979	0.059116	2.74935e-14
rs4789229	cg23470227	-0.0495808	3.34555e-14
rs9348211	cg20406979	0.0588486	1.33895e-14
rs6920364	cg20406979	0.0588486	1.33895e-14
rs2769352	cg20406979	0.0588486	1.33895e-14
rs1811120	cg20406979	0.0588486	1.33895e-14
rs427824	cg20406979	0.0588486	1.33895e-14
rs9717862	cg20406979	0.0589126	1.18461e-14
rs6091091	cg00568296	-0.0976434	3.22119e-12
rs4300780	cg09152259	0.0447347	7.96528e-09
rs12613252	cg09152259	0.0447347	7.96528e-09
rs12613254	cg09152259	0.0447347	7.96528e-09
rs13414676	cg09152259	0.0447347	7.96528e-09
rs13390029	cg09152259	0.0447347	7.96528e-09
rs13409933	cg09152259	0.0447347	7.96528e-09
rs239934	cg20406979	0.0590295	2.36503e-14
rs55636440	cg23470227	-0.049083	6.57e-14
rs28807127	cg09152259	0.0435581	7.95778e-09
rs13017103	cg09152259	0.0435581	7.95778e-09
rs10221244	cg23470227	-0.0466587	8.34956e-14
rs4346838	cg20406979	0.0592719	2.07512e-14
rs2345572	cg20406979	0.0592719	2.07512e-14
rs34006114	cg09152259	0.0454355	4.0065e-08
rs3212701	cg02370334	-0.0600995	2.74588e-15
rs11899601	cg09152259	0.044363	8.74812e-09
rs10167294	cg09152259	0.044363	8.74812e-09
rs8081539	cg23470227	-0.0481175	7.31364e-14
rs4150434	cg09152259	0.0443181	3.34149e-09
rs12614320	cg09152259	0.043987	9.00504e-09
rs12600868	cg23470227	-0.0466908	1.37927e-13
rs8047999	cg22873414	0.0502303	8.88018e-14
rs1143407	cg09152259	0.0437607	6.3569e-09
rs35757209	cg23470227	-0.0483037	5.89432e-14
rs4789227	cg23470227	-0.0481677	7.6204e-14
rs78742057	cg20859453	-0.177152	2.25903e-12
rs73645935	cg20859453	-0.177152	2.25903e-12
rs6475024	cg20859453	-0.177152	2.25903e-12
rs7218058	cg23470227	-0.0487723	1.56963e-13
rs3738948	cg09152259	0.0435049	7.34193e-09
rs4150514	cg09152259	0.0435049	7.34193e-09
rs58063879	cg09152259	0.0435049	7.34193e-09
rs13403918	cg09152259	0.0435049	7.34193e-09
rs12617858	cg09152259	0.0435049	7.34193e-09
rs2134794	cg09152259	0.0435049	7.34193e-09
rs6716392	cg09152259	0.0462581	1.78464e-09
rs16977599	cg12421287	0.0546529	2.91586e-13
rs7216615	cg23470227	-0.0482354	3.05434e-13
rs2061387	cg23470227	-0.048303	2.31146e-13
rs7217432	cg23470227	-0.048303	2.31146e-13
rs7221792	cg23470227	-0.0460052	5.56602e-13
rs7217536	cg23470227	-0.0465435	9.98109e-13
rs7216512	cg23470227	-0.0465435	9.98109e-13
rs12602430	cg23470227	-0.0465435	9.98109e-13
rs12603812	cg23470227	-0.0465435	9.98109e-13
rs2071556	cg09017117	0.0427485	4.30198e-12
rs2238644	cg02370334	-0.0596864	5.28107e-15
rs8051462	cg22873414	0.0473673	1.60296e-12
rs9459835	cg20406979	0.0561546	4.36198e-13
rs7223416	cg23470227	-0.0464977	1.38505e-12
rs6929466	cg20406979	0.0557996	9.59665e-13
rs9459840	cg20406979	0.0557996	9.59665e-13
rs9459841	cg20406979	0.0557996	9.59665e-13
rs6904946	cg20406979	0.0557996	9.59665e-13
rs6900701	cg20406979	0.0557996	9.59665e-13
rs6923582	cg20406979	0.0557996	9.59665e-13
rs2237276	cg20406979	0.0557996	9.59665e-13
rs13195812	cg20406979	0.0557996	9.59665e-13
rs9295385	cg20406979	0.0557996	9.59665e-13
rs35708549	cg09152259	0.0453147	1.26842e-07
rs13034157	cg09152259	0.0453147	1.26842e-07
rs35171809	cg20406979	0.0539218	5.65448e-12
rs10017705	cg27569037	0.0760549	4.93006e-14
rs4234892	cg27569037	0.0760549	4.93006e-14
rs4690807	cg27569037	0.0760549	4.93006e-14
rs9923	cg09152259	0.0428669	1.54837e-07
rs11731244	cg27569037	0.0759108	3.509e-14
rs6735779	cg09152259	0.0444349	2.27009e-07
rs8100347	cg02370334	-0.0612204	7.99721e-15
rs67771362	cg09152259	0.0444349	2.27009e-07
rs11684068	cg09152259	0.0434348	3.69595e-07
rs2139142	cg09152259	0.0434348	3.69595e-07
rs34703177	cg09152259	0.0450753	1.61718e-07
rs34441363	cg09152259	0.0450753	1.61718e-07
rs6738811	cg09152259	0.0450753	1.61718e-07
rs6752139	cg09152259	0.0450753	1.61718e-07
rs147898570	cg09152259	0.0450753	1.61718e-07
rs7970524	cg27246571	-0.0599622	3.12389e-11
rs9894244	cg23470227	-0.0453263	5.34966e-12
rs9894291	cg23470227	-0.0453263	5.34966e-12
rs12526548	cg20406979	0.0526672	2.21768e-11
rs9459839	cg20406979	0.0526672	2.21768e-11
rs1894603	cg20406979	0.0526672	2.21768e-11
rs9459845	cg20406979	0.0526672	2.21768e-11
rs9457257	cg20406979	0.0526672	2.21768e-11
rs9459846	cg20406979	0.0526672	2.21768e-11
rs6456146	cg20406979	0.0526672	2.21768e-11
rs9295384	cg20406979	0.0526672	2.21768e-11
rs12619391	cg09152259	0.0434761	2.94019e-07
rs2203894	cg15815084	0.088646	8.9781e-11
rs11655389	cg23470227	-0.0458983	2.07059e-12
rs4150506	cg09152259	0.0445083	2.89678e-07
rs58875777	cg27569037	0.0666237	3.21781e-13
rs239933	cg20406979	0.052539	1.49161e-11
rs3744006	cg23470227	-0.0455849	7.19123e-12
rs9459842	cg20406979	0.0525442	1.27386e-11
rs7749278	cg20406979	0.0525442	1.27386e-11
rs2282861	cg20406979	0.0525442	1.27386e-11
rs2282860	cg20406979	0.0525442	1.27386e-11
rs2181059	cg20406979	0.0525442	1.27386e-11
rs2237277	cg20406979	0.0525442	1.27386e-11
rs9457258	cg20406979	0.0525442	1.27386e-11
rs10946205	cg20406979	0.0525442	1.27386e-11
rs28836897	cg27569037	0.0759255	1.40266e-13
rs28875870	cg27569037	0.0759255	1.40266e-13
rs4588419	cg27569037	0.0759255	1.40266e-13
rs4690808	cg27569037	0.0759255	1.40266e-13
rs6456143	cg20406979	0.0519917	2.067e-11
rs2237273	cg20406979	0.0523703	3.74921e-11
rs34601617	cg09152259	0.0421018	4.15728e-07
rs9897048	cg23470227	-0.0447949	7.91733e-12
rs935471	cg11878712	0.0520418	1.29356e-11
rs35103294	cg23470227	-0.0436004	5.24069e-12
rs8074963	cg23470227	-0.0464522	7.90965e-12
rs903202	cg22873414	0.047726	3.70041e-12
rs4789155	cg02433148	0.0346737	5.55182e-10
rs1979215	cg23470227	-0.0465109	2.59183e-12
rs6503769	cg15815084	0.0910406	1.51038e-10
rs12600529	cg15815084	0.0910406	1.51038e-10
rs62353271	cg27569037	0.078756	4.53122e-14
rs8067076	cg23470227	-0.0465018	8.84847e-12
rs2237275	cg20406979	0.0523719	3.96106e-11
rs2237274	cg20406979	0.0523719	3.96106e-11
rs6747862	cg09152259	0.0426278	4.04671e-07
rs4150492	cg09152259	0.0431814	2.61095e-07
rs9906591	cg12582317	0.0519584	1.02584e-11
rs886925	cg12582317	0.0519584	1.02584e-11
rs1970872	cg15815084	0.0895564	2.53487e-10
rs3867602	cg15815084	0.0895564	2.53487e-10
rs2301436	cg20406979	0.0514374	4.94758e-11
rs6503768	cg15815084	0.0890146	2.15616e-10
rs3791268	cg11878712	0.0517801	5.21002e-11
rs10484531	cg20406979	0.0540989	2.51109e-11
rs386793608;rs1519976	cg22873414	0.0452119	4.42704e-11
rs768410	cg22873414	0.0452119	4.42704e-11
rs3791264	cg11878712	0.0516794	6.23033e-11
rs11695371	cg11878712	0.0516794	6.23033e-11
rs11676854	cg11878712	0.0516794	6.23033e-11
rs7576554	cg11878712	0.0516794	6.23033e-11
rs7593036	cg11878712	0.0516794	6.23033e-11
rs6757621	cg11878712	0.0516794	6.23033e-11
rs57223057	cg11878712	0.0516794	6.23033e-11
rs7596803	cg11878712	0.0516794	6.23033e-11
rs10946203	cg20406979	0.0529424	1.0715e-10
rs2540499	cg27246571	-0.0567986	2.0337e-10
rs2540498	cg27246571	-0.0567986	2.0337e-10
rs376571402	cg20406979	0.0535202	2.68544e-11
rs55913048	cg02893324	-0.0573211	1.40181e-09
rs9459836	cg20406979	0.0538537	8.33599e-11
rs386708545;rs200447952;rs79452434	cg20406979	0.053582	3.01116e-11
rs199612119;rs147968	cg22873414	0.04734	3.22936e-11
rs12212247	cg20406979	0.0529424	1.0715e-10
rs6428525	cg23747839	-0.0622234	3.3436e-10
rs12477214	cg09152259	0.0354394	4.01901e-07
rs9457254	cg20406979	0.0529424	1.0715e-10
rs2237272	cg20406979	0.0529424	1.0715e-10
rs10455982	cg20406979	0.0529424	1.0715e-10
rs1850689	cg09152259	0.0354394	4.01901e-07
rs71373396	cg15815084	0.0869491	8.90248e-10
rs9459838	cg20406979	0.0528565	1.14481e-10
rs13008440	cg09152259	0.0397925	1.22676e-06
rs56151459	cg02893324	-0.0567135	1.65955e-09
rs13032010	cg02893324	-0.0567135	1.65955e-09
rs9457256	cg20406979	0.0524819	1.53836e-10
rs1990231	cg12582317	0.0508182	2.33695e-11
rs9910446	cg12582317	0.0508182	2.33695e-11
rs12451748	cg12582317	0.0508182	2.33695e-11
rs12451753	cg12582317	0.0508182	2.33695e-11
rs12449409	cg12582317	0.0508182	2.33695e-11
rs7220397	cg12582317	0.0508182	2.33695e-11
rs8081251	cg12582317	0.0508182	2.33695e-11
rs1060404	cg20406979	0.0524507	1.61817e-10
rs4710171	cg20406979	0.0524507	1.61817e-10
rs9457252	cg20406979	0.0524507	1.61817e-10
rs3752520	cg20406979	0.0524507	1.61817e-10
rs9459849	cg20406979	0.0524507	1.61817e-10
rs9457259	cg20406979	0.0524507	1.61817e-10
rs10946204	cg20406979	0.0524507	1.61817e-10
rs2332966	cg12582317	0.0499116	5.93784e-11
rs55894868	cg02893324	-0.0560267	4.30135e-09
rs12990553	cg02893324	-0.0573211	1.40181e-09
rs3769161	cg02893324	-0.0573211	1.40181e-09
rs56084435	cg02893324	-0.055534	6.35851e-09
rs375004057	cg02893324	-0.055534	6.35851e-09
rs377400560	cg02893324	-0.055534	6.35851e-09
rs2742417	cg15361247	0.0525663	8.04504e-14
rs4359587	cg09152259	0.0429232	2.74533e-07
rs2251954	cg15361247	0.0525446	7.13782e-14
rs2742421	cg15361247	0.0530272	7.24597e-14
rs36053895;rs386355408	cg02893324	-0.0554472	4.19779e-09
rs2076857	cg02893324	-0.0561625	3.27809e-09
rs9877499	cg15361247	0.0510727	5.13154e-13
rs2673035;rs142054397	cg15361247	0.0524584	1.15448e-13
rs2742420	cg15361247	0.0523092	1.28111e-13
rs2673051	cg15361247	0.0523092	1.28111e-13
rs2742422	cg15361247	0.0523092	1.28111e-13
rs2742423	cg15361247	0.0523092	1.28111e-13
rs17328701	cg15361247	0.0523092	1.28111e-13
rs1969624	cg15361247	0.0523092	1.28111e-13
rs1969625	cg15361247	0.0523092	1.28111e-13
rs1609553	cg15361247	0.0523092	1.28111e-13
rs1609554	cg15361247	0.0523092	1.28111e-13
rs2673058	cg15361247	0.0523092	1.28111e-13
rs2673057	cg15361247	0.0523092	1.28111e-13
rs2742426	cg15361247	0.0523092	1.28111e-13
rs2742427	cg15361247	0.0523092	1.28111e-13
rs2742429	cg15361247	0.0523092	1.28111e-13
rs2742430	cg15361247	0.0523092	1.28111e-13
rs2742431	cg15361247	0.0523092	1.28111e-13
rs2742432	cg15361247	0.0523092	1.28111e-13
rs2673056	cg15361247	0.0523092	1.28111e-13
rs9825559	cg15361247	0.0523092	1.28111e-13
rs9809868	cg15361247	0.0523092	1.28111e-13
rs9829631	cg15361247	0.0523092	1.28111e-13
rs1534875	cg15361247	0.0523092	1.28111e-13
rs1534876	cg15361247	0.0523092	1.28111e-13
rs2673047	cg15361247	0.0523092	1.28111e-13
rs2742438	cg15361247	0.0523092	1.28111e-13
rs2742439	cg15361247	0.0523092	1.28111e-13
rs938363;rs34519783	cg15361247	0.0523092	1.28111e-13
rs938362	cg15361247	0.0523092	1.28111e-13
rs1969626	cg15361247	0.0523092	1.28111e-13
rs2373047	cg15361247	0.0523092	1.28111e-13
rs2742441	cg15361247	0.0523092	1.28111e-13
rs2742442	cg15361247	0.0523092	1.28111e-13
rs2673038	cg15361247	0.0523092	1.28111e-13
rs2673037	cg15361247	0.0523092	1.28111e-13
rs2245705	cg15361247	0.0523092	1.28111e-13
rs1883096	cg15361247	0.0523092	1.28111e-13
rs2673036	cg15361247	0.0523092	1.28111e-13
rs2742445	cg15361247	0.0523092	1.28111e-13
rs1877934	cg15361247	0.0523092	1.28111e-13
rs1877933	cg15361247	0.0523092	1.28111e-13
rs1877932	cg15361247	0.0523092	1.28111e-13
rs2742369	cg15361247	0.0523092	1.28111e-13
rs2248991	cg15361247	0.0523092	1.28111e-13
rs2673034	cg15361247	0.0523092	1.28111e-13
rs2742385	cg15361247	0.0523092	1.28111e-13
rs2742389	cg15361247	0.0523092	1.28111e-13
rs2742390	cg15361247	0.0523092	1.28111e-13
rs2742393	cg15361247	0.0523092	1.28111e-13
rs2742373	cg15361247	0.0523092	1.28111e-13
rs1109278	cg10065189	-0.046464	2.55221e-16
rs2673025	cg15361247	0.0523541	1.37861e-13
rs2742452	cg15361247	0.0523541	1.37861e-13
rs2673065	cg15361247	0.0523541	1.37861e-13
rs2742462	cg15361247	0.0523541	1.37861e-13
rs2742418	cg15361247	0.0522163	2.09129e-13
rs2742419	cg15361247	0.0522163	2.09129e-13
rs7134860	cg27246571	-0.0568844	3.82456e-09
rs7134975	cg27246571	-0.0568844	3.82456e-09
rs7306086	cg27246571	-0.0568844	3.82456e-09
rs61937880	cg27246571	-0.0568844	3.82456e-09
rs61937881	cg27246571	-0.0568844	3.82456e-09
rs10930579	cg02893324	-0.0547109	7.45871e-09
rs2742368	cg15361247	0.0509309	4.25312e-13
rs17677343	cg27246571	-0.056631	3.744e-09
rs9905938	cg12582317	0.049214	1.03414e-10
rs8064970	cg12582317	0.049214	1.03414e-10
rs2742386	cg15361247	0.0510264	4.00261e-13
rs6800556	cg15361247	0.0517598	4.52562e-13
rs2660892	cg27246571	-0.055565	8.7058e-09
rs6426551	cg02280892	0.0837787	1.14645e-13
rs12949028	cg12582317	0.0484108	2.24173e-10
rs12950062	cg12582317	0.0484108	2.24173e-10
rs7517174	cg02280892	0.0833764	1.28478e-13
rs10023382	cg27569037	0.0626836	8.16394e-12
rs2540488	cg27246571	-0.0529813	1.20211e-08
rs2673033	cg15361247	0.0509533	8.96693e-13
rs4793566	cg12582317	0.0484646	6.29197e-10
rs7211686	cg12582317	0.0484646	6.29197e-10
rs2660891	cg27246571	-0.0561274	7.68225e-09
rs2673052	cg15361247	0.0529167	2.37134e-13
rs886926	cg12582317	0.0481412	6.82779e-10
rs2247304	cg27246571	-0.0521752	2.25924e-08
rs6668851	cg02280892	0.0846658	7.8566e-14
rs71343622	cg09152259	0.0459095	1.07845e-06
rs2660838	cg27246571	-0.0542864	1.60583e-08
rs6456150	cg20406979	0.0456837	4.59294e-09
rs7212186	cg12582317	0.0478159	1.31552e-09
rs6702917	cg02280892	0.0816577	4.77513e-13
rs2540493	cg27246571	-0.0541308	1.41198e-08
rs6932740	cg20406979	0.0454436	5.19457e-09
rs6934043	cg20406979	0.0454436	5.19457e-09
rs1358882	cg20406979	0.0454436	5.19457e-09
rs1358883	cg20406979	0.0454436	5.19457e-09
rs9457261	cg20406979	0.0454436	5.19457e-09
rs1407315	cg20406979	0.0454436	5.19457e-09
rs12527827	cg20406979	0.0454436	5.19457e-09
rs12529959	cg20406979	0.0454436	5.19457e-09
rs6909475	cg20406979	0.0454436	5.19457e-09
rs6909502	cg20406979	0.0454436	5.19457e-09
rs12523712	cg20406979	0.0454436	5.19457e-09
rs911632	cg20406979	0.0454436	5.19457e-09
rs1810644	cg20406979	0.0454436	5.19457e-09
rs1810645	cg20406979	0.0454436	5.19457e-09
rs2017338	cg20406979	0.0454436	5.19457e-09
rs6456151	cg20406979	0.0454436	5.19457e-09
rs6456153	cg20406979	0.0454436	5.19457e-09
rs6456154	cg20406979	0.0454436	5.19457e-09
rs12203510	cg20406979	0.0454436	5.19457e-09
rs13195158	cg20406979	0.0454436	5.19457e-09
rs2187859	cg20406979	0.0454436	5.19457e-09
rs9457266	cg20406979	0.0454436	5.19457e-09
rs7750209	cg20406979	0.0454436	5.19457e-09
rs7746628	cg20406979	0.0454436	5.19457e-09
rs4598049	cg20406979	0.0454436	5.19457e-09
rs2345753	cg20406979	0.0454436	5.19457e-09
rs2345754	cg20406979	0.0454436	5.19457e-09
rs7761977	cg20406979	0.0454436	5.19457e-09
rs7742305	cg20406979	0.0454436	5.19457e-09
rs7762156	cg20406979	0.0454436	5.19457e-09
rs2001115	cg20406979	0.0454436	5.19457e-09
rs9459862	cg20406979	0.0454436	5.19457e-09
rs6909180	cg20406979	0.0457718	4.68126e-09
rs12213683	cg20406979	0.0457718	4.68126e-09
rs12529876	cg20406979	0.0457718	4.68126e-09
rs12528323	cg20406979	0.0457718	4.68126e-09
rs12528689	cg20406979	0.0457718	4.68126e-09
rs13208636	cg20406979	0.0457718	4.68126e-09
rs7748224	cg20406979	0.0458435	6.13608e-09
rs6456149	cg20406979	0.0457902	5.18787e-09
rs2181058	cg20406979	0.0457902	5.18787e-09
rs12529238	cg20406979	0.0457902	5.18787e-09
rs2540497	cg27246571	-0.053642	1.69892e-08
rs2660900	cg27246571	-0.053642	1.69892e-08
rs4793912	cg12582317	0.051369	3.44082e-11
rs6936261	cg20406979	0.0451964	4.08131e-09
rs13210649	cg20406979	0.0451964	4.08131e-09
rs12213801	cg20406979	0.0451964	4.08131e-09
rs9457265	cg20406979	0.0451964	4.08131e-09
rs2251021	cg15361247	-0.0467909	1.08369e-10
rs9459853	cg20406979	0.0455489	4.05062e-09
rs13008554	cg02893324	-0.050486	9.35278e-08
rs7297245	cg27246571	-0.0565643	4.05965e-08
rs17761169	cg02893324	-0.0505136	6.75622e-08
rs2028382	cg02893324	-0.0514007	8.45015e-09
rs3769167	cg02893324	-0.0500302	1.14438e-07
rs2673049	cg15361247	-0.049418	2.91854e-11
rs2742392	cg15361247	-0.049418	2.91854e-11
rs2742447	cg15361247	-0.049418	2.91854e-11
rs12633747	cg15361247	-0.0494171	2.64014e-11
rs7966537	cg27246571	-0.0572949	3.28291e-08
rs17676451	cg27246571	-0.0572949	3.28291e-08
rs12525345	cg20406979	0.0453992	4.54236e-09
rs10018252	cg27569037	0.0636993	9.13036e-12
rs10745746	cg27246571	-0.0572949	3.28291e-08
rs4762659	cg27246571	-0.0572949	3.28291e-08
rs2289399	cg02893324	-0.050528	8.09685e-08
rs2673053	cg15361247	-0.053591	2.20027e-10
rs2742424	cg15361247	-0.053591	2.20027e-10
rs2742433	cg15361247	-0.053591	2.20027e-10
rs3754741	cg02893324	-0.0505306	7.3095e-08
rs2069918	cg09152259	0.038552	1.21535e-06
rs2157388	cg20406979	0.0449275	2.53539e-08
rs9262148	cg16586538	0.0471964	8.68734e-07
rs6512230	cg02370334	-0.0505976	7.28086e-12
rs17733203	cg27246571	-0.0572443	2.84322e-08
rs73216216	cg27246571	-0.0572443	2.84322e-08
rs56361316	cg27246571	-0.0572443	2.84322e-08
rs767280	cg15361247	-0.0480593	6.52447e-11
rs1468543	cg15361247	-0.0481102	5.95617e-11
rs2742406	cg15361247	-0.0481102	5.95617e-11
rs9311378	cg15361247	-0.0481102	5.95617e-11
rs2742454	cg15361247	-0.0481102	5.95617e-11
rs2742435	cg15361247	-0.0480999	5.43499e-11
rs2742436	cg15361247	-0.0480999	5.43499e-11
rs2742437	cg15361247	-0.0480999	5.43499e-11
rs2673039	cg15361247	-0.0480999	5.43499e-11
rs2249357	cg15361247	-0.0480999	5.43499e-11
rs2742397	cg15361247	-0.0480999	5.43499e-11
rs2673028	cg15361247	-0.0480999	5.43499e-11
rs9821974;rs71622516	cg15361247	-0.0480999	5.43499e-11
rs12301817	cg27246571	-0.0530153	4.26999e-08
rs9262113	cg16586538	0.04594	4.55755e-06
rs7759666	cg16586538	0.04594	4.55755e-06
rs9262122	cg16586538	0.0462126	5.19531e-06
rs3893313	cg09152259	0.0429232	2.74533e-07
rs56396137	cg27246571	-0.0576734	3.4682e-08
rs2069928	cg09152259	0.0395975	9.35134e-07
rs7137420	cg27246571	-0.0535427	8.82314e-08
rs7308844	cg27246571	-0.0535427	8.82314e-08
rs6538694	cg27246571	-0.0535427	8.82314e-08
rs6538695	cg27246571	-0.0535427	8.82314e-08
rs720325	cg20406979	0.0440182	2.06246e-08
rs2069914	cg09152259	0.0340406	5.43574e-06
rs2069913	cg09152259	0.0385203	1.26345e-06
rs76882214	cg27246571	-0.0573171	3.71763e-08
rs74334526	cg27246571	-0.0573171	3.71763e-08
rs7211504	cg16851743	-0.0426362	6.47756e-09
rs9459855	cg20406979	0.045395	2.6008e-08
rs4713340	cg16586538	0.04594	4.55755e-06
rs6538693	cg27246571	-0.0561464	6.15781e-08
rs12989081	cg09152259	0.031908	1.85772e-06
rs305069	cg22873414	-0.0453235	6.00489e-09
rs10484530	cg20406979	0.0453845	2.19628e-08
rs9457260	cg20406979	0.0449275	2.53539e-08
rs17524252	cg20406979	0.0449275	2.53539e-08
rs4710175	cg20406979	0.0449275	2.53539e-08
rs916331	cg20406979	0.0449275	2.53539e-08
rs13204839	cg20406979	0.0449275	2.53539e-08
rs6456152	cg20406979	0.0449275	2.53539e-08
rs9457262	cg20406979	0.0449275	2.53539e-08
rs4412174	cg20406979	0.0449275	2.53539e-08
rs4458654	cg20406979	0.0449275	2.53539e-08
rs34155048	cg20406979	0.0449275	2.53539e-08
rs34611616	cg20406979	0.0449275	2.53539e-08
rs7766242	cg20406979	0.0449275	2.53539e-08
rs424971	cg22873414	0.041594	6.53307e-09
rs12209395	cg20406979	0.0453869	2.43597e-08
rs6920858	cg20406979	0.0453869	2.43597e-08
rs9459854	cg20406979	0.0453869	2.43597e-08
rs79268829	cg05840754	-0.0560214	6.32657e-07
rs12692064	cg09152259	0.0329018	1.39914e-06
rs2069912	cg09152259	0.0327586	1.25009e-05
rs75893338	cg05840754	-0.0520471	2.9911e-06
rs6509196	cg05840754	-0.0629938	3.39604e-07
rs34658268	cg02893324	-0.0476576	3.24431e-07
rs171329	cg09017117	-0.0358692	2.88108e-08
rs6430935	cg09152259	0.0329018	1.39914e-06
rs13017438	cg02893324	-0.0484577	3.60033e-07
rs10915994	cg02280892	0.0753421	6.7654e-10
rs12208359	cg20406979	0.0451191	3.92411e-08
rs60864846	cg05840754	-0.0644128	1.13951e-07
rs2742379	cg15361247	-0.0467265	2.91748e-10
rs2239827	cg20406979	0.0446078	2.33791e-08
rs10946207	cg20406979	0.0449785	3.96072e-08
rs2038580	cg20406979	0.0449785	3.96072e-08
rs9262152	cg16586538	0.04594	4.55755e-06
rs1990231	cg12229367	0.0223479	1.52824e-08
rs9910446	cg12229367	0.0223479	1.52824e-08
rs12451748	cg12229367	0.0223479	1.52824e-08
rs12451753	cg12229367	0.0223479	1.52824e-08
rs12449409	cg12229367	0.0223479	1.52824e-08
rs7220397	cg12229367	0.0223479	1.52824e-08
rs8081251	cg12229367	0.0223479	1.52824e-08
rs9893344	cg12582317	0.0463452	4.08787e-09
rs7258183	cg05840754	-0.0638198	1.3709e-07
rs73562275	cg05840754	-0.0638198	1.3709e-07
rs2289397	cg02893324	-0.0483151	3.38705e-07
rs73562265	cg05840754	-0.0638198	1.3709e-07
rs9262147	cg16586538	0.0468689	7.48056e-06
rs13001648	cg09152259	0.0339726	1.21175e-06
rs9262136	cg16586538	0.046568	5.26813e-06
rs12302993	cg27246571	-0.0479698	2.77726e-08
rs73216221	cg27246571	-0.05573	1.92814e-08
rs4662729	cg09152259	0.0336275	1.67229e-06
rs1883094	cg15361247	-0.0511521	8.24015e-10
rs35798859;rs531335101	cg20406979	0.0455725	3.66171e-08
rs2666428	cg02280892	0.0674035	6.42999e-11
rs2894041	cg16586538	0.0458033	9.08969e-06
rs12490293	cg15361247	0.0439515	8.91013e-10
rs3219112	cg02280892	0.0674427	3.2003e-11
rs3754376	cg02280892	0.0674427	3.2003e-11
rs6728362	cg09152259	0.0332177	2.15071e-06
rs712210	cg16119449	-0.0413008	1.35606e-06
rs9675230	cg23470227	-0.0413814	1.41408e-09
rs3212713;rs386807459	cg02370334	-0.0513885	1.84415e-11
rs9905938	cg12229367	0.0217505	3.08576e-08
rs8064970	cg12229367	0.0217505	3.08576e-08
rs712211	cg16119449	-0.0411737	1.14866e-06
rs2793382	cg02280892	0.0666678	6.11087e-11
rs2793380	cg02280892	0.0666678	6.11087e-11
rs2793657	cg02280892	0.0666678	6.11087e-11
rs9906591	cg12229367	0.0214154	9.67576e-08
rs886925	cg12229367	0.0214154	9.67576e-08
rs4709147	cg20406979	0.0446115	1.12055e-07
rs886926	cg12229367	0.0222238	2.54171e-08
rs3212711	cg02370334	-0.0510083	2.96314e-11
rs8078208	cg23470227	-0.0413814	1.41408e-09
rs9347170	cg20406979	-0.0489023	1.65649e-09
rs9459872	cg20406979	0.0447516	9.84866e-08
rs2516640	cg16586538	0.0430355	1.93281e-05
rs17615336	cg20406979	0.045238	2.5945e-08
rs12332076	cg27569037	0.0684545	6.7083e-10
rs9993501	cg27569037	0.0684545	6.7083e-10
rs2069921	cg09152259	0.0339075	6.2585e-06
rs973760	cg09152259	0.0339075	6.2585e-06
rs3219090	cg02280892	0.0681032	2.86752e-11
rs4947285	cg16586538	0.0463348	8.10326e-06
rs2285148	cg20406979	0.0451247	2.45674e-08
rs9262124	cg16586538	0.0458033	9.08969e-06
rs747657	cg02280892	0.0681032	2.86752e-11
rs4793566	cg12229367	0.0220114	3.67766e-08
rs7211686	cg12229367	0.0220114	3.67766e-08
rs3219119	cg02280892	0.0682467	4.22429e-11
rs2048424	cg02280892	0.0673083	5.58632e-11
rs1417765	cg02280892	0.0673083	5.58632e-11
rs11680815	cg09152259	0.0428724	3.85658e-05
rs11697330	cg00568296	-0.0645509	7.50095e-10
rs758506	cg05840754	-0.0598669	1.1628e-07
rs2247771	cg15361247	-0.0506177	1.01935e-09
rs2069933	cg09152259	0.0340794	1.33185e-06
rs443570	cg23216724	0.0518637	3.49325e-09
rs2910884	cg06726471	0.0478753	3.76941e-08
rs2377313	cg02280892	0.0671187	1.70342e-10
rs1811123	cg23216724	0.05332	1.65887e-09
rs12949688	cg12582317	0.0445794	4.09472e-08
rs55874825	cg01297684	0.0587252	3.56284e-10
rs62242234	cg15361247	-0.0519842	4.02992e-09
rs2239826	cg20406979	0.0438407	1.18495e-07
rs1401296	cg09152259	0.0338191	1.57415e-06
rs2757039	cg20406979	-0.0471695	4.26058e-09
rs10424547	cg25690897	-0.0563121	1.10646e-08
rs7686032	cg27569037	0.0656885	1.24949e-09
rs2673048	cg15361247	0.0552538	7.50495e-11
rs2742457	cg15361247	0.0552538	7.50495e-11
rs2015864	cg23216724	0.0518775	3.90793e-09
rs58413607	cg25690897	-0.0547921	1.78259e-08
rs12525855	cg20406979	0.0418214	2.21591e-07
rs10946209	cg20406979	0.0418214	2.21591e-07
rs2001114	cg20406979	0.0418214	2.21591e-07
rs62436765	cg20406979	0.0421785	2.01392e-07
rs10946208	cg20406979	0.0421785	2.01392e-07
rs1962800	cg15361247	0.0552538	7.50495e-11
rs2757044	cg23216724	0.0514339	5.57807e-09
rs7212186	cg12229367	0.0214871	8.27005e-08
rs552492	cg19070398	-0.0501373	5.64077e-08
rs4794668	cg15815084	0.065513	1.73966e-07
rs998247	cg00302379	-0.020873	8.15322e-07
rs10143198	cg00302379	-0.020873	8.15322e-07
rs17585333	cg27569037	0.0654496	1.91521e-09
rs393727	cg23216724	0.0522137	2.18159e-09
rs4662730	cg09152259	0.031178	6.09506e-06
rs7251606	cg25690897	-0.045124	5.48371e-07
rs11735317	cg27569037	0.0666091	2.49132e-09
rs2048426	cg02280892	0.0666678	6.11087e-11
rs828875	cg12777002	0.0520114	6.14527e-12
rs828874	cg12777002	0.0520114	6.14527e-12
rs12949028	cg12229367	0.021324	5.74743e-08
rs12950062	cg12229367	0.021324	5.74743e-08
rs2149083	cg23216724	0.0517316	3.40542e-09
rs2149084	cg23216724	0.0517316	3.40542e-09
rs2769346	cg23216724	0.0517316	3.40542e-09
rs2149085	cg23216724	0.0517316	3.40542e-09
rs2769347	cg23216724	0.0517316	3.40542e-09
rs2769348	cg23216724	0.0517316	3.40542e-09
rs2149090	cg23216724	0.0517316	3.40542e-09
rs2149091	cg23216724	0.0517316	3.40542e-09
rs2149092	cg23216724	0.0517316	3.40542e-09
rs12946237	cg15815084	0.0651903	2.24865e-07
rs7147987	cg00302379	-0.0245487	1.17843e-07
rs1805414	cg02280892	0.0673083	5.58632e-11
rs2027439	cg02280892	0.0673083	5.58632e-11
rs394522	cg23216724	0.0518637	3.49325e-09
rs1819333	cg23216724	0.0518637	3.49325e-09
rs2013815	cg23216724	0.0518637	3.49325e-09
rs2769349	cg23216724	0.0518637	3.49325e-09
rs1187530	cg23216724	0.0518637	3.49325e-09
rs2757050	cg23216724	0.0518637	3.49325e-09
rs1590257	cg23216724	0.0518637	3.49325e-09
rs2769351	cg23216724	0.0518637	3.49325e-09
rs6939196	cg23216724	0.0518637	3.49325e-09
rs2769354	cg23216724	0.0518637	3.49325e-09
rs2757052	cg23216724	0.0518637	3.49325e-09
rs1211447	cg23216724	0.0518637	3.49325e-09
rs1187532	cg23216724	0.0518637	3.49325e-09
rs434093	cg23216724	0.0518637	3.49325e-09
rs448060	cg23216724	0.0518637	3.49325e-09
rs365189	cg23216724	0.0518637	3.49325e-09
rs376551	cg23216724	0.0518637	3.49325e-09
rs386548	cg23216724	0.0518637	3.49325e-09
rs402749	cg23216724	0.0518637	3.49325e-09
rs385863	cg23216724	0.0518637	3.49325e-09
rs397713	cg23216724	0.0518637	3.49325e-09
rs453184	cg23216724	0.0518637	3.49325e-09
rs436707	cg23216724	0.0518637	3.49325e-09
rs442298	cg23216724	0.0518637	3.49325e-09
rs377753	cg23216724	0.0518637	3.49325e-09
rs430477	cg23216724	0.0518637	3.49325e-09
rs376574	cg23216724	0.0518637	3.49325e-09
rs439237	cg23216724	0.0518637	3.49325e-09
rs9457247	cg23216724	0.0518637	3.49325e-09
rs9459827	cg23216724	0.0518637	3.49325e-09
rs1794699	cg23216724	0.0518637	3.49325e-09
rs1743439	cg23216724	0.0518637	3.49325e-09
rs13192426	cg23216724	0.0518637	3.49325e-09
rs13192687	cg23216724	0.0518637	3.49325e-09
rs9717548	cg23216724	0.0518637	3.49325e-09
rs5020533	cg23216724	0.0518637	3.49325e-09
rs1620933	cg23216724	0.0518637	3.49325e-09
rs415987	cg23216724	0.0518637	3.49325e-09
rs1794697	cg23216724	0.0518637	3.49325e-09
rs34560498;rs386708543	cg23216724	0.0518637	3.49325e-09
rs414437	cg23216724	0.0518637	3.49325e-09
rs421214	cg23216724	0.0518637	3.49325e-09
rs422094	cg23216724	0.0518637	3.49325e-09
rs393558	cg23216724	0.0518637	3.49325e-09
rs436625	cg23216724	0.0518637	3.49325e-09
rs408040	cg23216724	0.0518637	3.49325e-09
rs408918	cg23216724	0.0518637	3.49325e-09
rs413232	cg23216724	0.0518637	3.49325e-09
rs86755	cg23216724	0.0518637	3.49325e-09
rs382009	cg23216724	0.0518637	3.49325e-09
rs428805	cg23216724	0.0518637	3.49325e-09
rs2345571	cg23216724	0.0518637	3.49325e-09
rs385460	cg23216724	0.0518637	3.49325e-09
rs385113	cg23216724	0.0518637	3.49325e-09
rs932644	cg23216724	0.0518637	3.49325e-09
rs10946198	cg23216724	0.0518637	3.49325e-09
rs1743440	cg23216724	0.0518637	3.49325e-09
rs1743441	cg23216724	0.0518637	3.49325e-09
rs1794694	cg23216724	0.0518637	3.49325e-09
rs430293	cg23216724	0.0518637	3.49325e-09
rs430097	cg23216724	0.0518637	3.49325e-09
rs409356	cg23216724	0.0518637	3.49325e-09
rs447042	cg23216724	0.0518637	3.49325e-09
rs402191	cg23216724	0.0518637	3.49325e-09
rs1794693	cg23216724	0.0518637	3.49325e-09
rs401260	cg23216724	0.0518637	3.49325e-09
rs422694	cg23216724	0.0518637	3.49325e-09
rs422780	cg23216724	0.0518637	3.49325e-09
rs400176	cg23216724	0.0518637	3.49325e-09
rs422562	cg23216724	0.0518637	3.49325e-09
rs416131	cg23216724	0.0518637	3.49325e-09
rs415890	cg23216724	0.0518637	3.49325e-09
rs415842	cg23216724	0.0518637	3.49325e-09
rs389956	cg23216724	0.0518637	3.49325e-09
rs389946	cg23216724	0.0518637	3.49325e-09
rs10946199	cg23216724	0.0519548	3.64077e-09
rs366938	cg23216724	0.0518804	3.84589e-09
rs1811121	cg23216724	0.0518804	3.84589e-09
rs401261	cg23216724	0.0518637	3.49325e-09
rs444210	cg23216724	-0.0539463	1.23336e-09
rs364283	cg23216724	0.0516243	3.45864e-09
rs429083	cg23216724	0.0516243	3.45864e-09
rs17279465	cg15361247	-0.040713	7.29332e-08
rs2578665	cg15361247	-0.0481432	6.08472e-09
rs3896369	cg15815084	0.0643028	2.59134e-07
rs11649870	cg15815084	0.0643028	2.59134e-07
rs3108163	cg12777002	0.0513074	9.14655e-12
rs2251109	cg15361247	-0.0457621	5.46784e-09
rs576702	cg19070398	0.0502577	2.82645e-08
rs2742434	cg15361247	0.0533245	1.71677e-10
rs2769355	cg23216724	0.0515878	6.46249e-09
rs2757054	cg23216724	0.0515878	6.46249e-09
rs10461909	cg06726471	0.0508792	6.17094e-08
rs28556935	cg02893324	-0.0487839	5.00477e-08
rs1397550	cg02280892	0.0637199	4.13558e-10
rs1341336	cg02280892	0.0637539	3.55344e-10
rs2793378	cg02280892	0.0637539	3.55344e-10
rs1104893	cg02280892	0.0637539	3.55344e-10
rs2793377	cg02280892	0.0637539	3.55344e-10
rs2377013	cg02280892	0.0637539	3.55344e-10
rs2249844	cg02280892	0.0637539	3.55344e-10
rs1828446	cg02280892	0.0637539	3.55344e-10
rs1828445	cg02280892	0.0637539	3.55344e-10
rs2793654	cg02280892	0.0637539	3.55344e-10
rs2666427	cg02280892	0.0637539	3.55344e-10
rs11685001	cg02893324	-0.0447232	2.31676e-06
rs3966008	cg15815084	0.0643028	2.59134e-07
rs1899629	cg15815084	0.0643028	2.59134e-07
rs4793831	cg15815084	0.0643028	2.59134e-07
rs3853823	cg15815084	0.0643028	2.59134e-07
rs7219961	cg15815084	0.0643028	2.59134e-07
rs8078452	cg23470227	-0.0417254	3.38484e-09
rs112264669;rs148230910;rs746712206;rs369727001;rs371862832;rs375707057;rs386733089;rs796779136;rs867086807	cg20859453	0.0981999	1.05451e-09
rs405553	cg23216724	0.0515986	6.38956e-09
rs2052563	cg06726471	0.0495067	1.97305e-07
rs4691171	cg27569037	0.0572799	9.58074e-08
rs4691172	cg27569037	0.0572799	9.58074e-08
rs28495910	cg27569037	0.0572799	9.58074e-08
rs9968334	cg27569037	0.0572799	9.58074e-08
rs6834975	cg27569037	0.0572799	9.58074e-08
rs6835694	cg27569037	0.0572799	9.58074e-08
rs12198816	cg20406979	0.0413237	3.93547e-07
rs2332966	cg12229367	0.0199079	7.67677e-07
rs971207	cg09152259	0.0325775	3.24665e-06
rs1518759	cg09152259	0.0325775	3.24665e-06
rs1957949	cg00302379	-0.0203394	1.80098e-06
rs2534816	cg16586538	0.0441017	1.39407e-05
rs12313602	cg01297684	0.058438	7.83875e-10
rs55927117	cg01297684	0.0593044	1.30046e-09
rs4710147	cg23216724	0.0512934	6.03858e-09
rs2757046	cg23216724	0.0512934	6.03858e-09
rs2757047	cg23216724	0.0512934	6.03858e-09
rs9624047	cg06040542	-0.033584	6.00631e-06
rs1865222	cg02280892	0.0636397	5.77846e-10
rs1865221	cg02280892	0.0636397	5.77846e-10
rs1865220	cg02280892	0.0636397	5.77846e-10
rs2695235	cg02280892	0.0636397	5.77846e-10
rs2793655	cg02280892	0.0636397	5.77846e-10
rs2793376	cg02280892	0.0636397	5.77846e-10
rs2695236	cg02280892	0.0636397	5.77846e-10
rs8054065	cg22873414	0.0368399	6.97899e-07
rs8512	cg16586538	0.0387285	7.38443e-05
rs2345573	cg23216724	0.0517643	3.28748e-09
rs4710149	cg20406979	-0.0442578	4.09631e-08
rs7750593	cg20406979	-0.0442578	4.09631e-08
rs5996483	cg06040542	-0.0335447	6.91252e-06
rs2267011	cg06040542	-0.0335447	6.91252e-06
rs4972533	cg02893324	-0.0422159	5.77894e-06
rs56816393	cg06726471	0.0480491	2.18017e-08
rs2910907	cg06726471	0.0480491	2.18017e-08
rs4605609	cg27569037	0.0565682	2.10395e-09
rs2296316	cg00302379	-0.0236083	2.53882e-07
rs2695237	cg02280892	0.0628878	6.57691e-10
rs11649318	cg22873414	0.0375994	6.66413e-08
rs2963960	cg06726471	0.0498438	1.03798e-07
rs17581728	cg23470227	-0.0385004	1.90803e-06
rs5936	cg09152259	0.0316412	5.60241e-06
rs2673067	cg15361247	-0.0462981	2.42129e-09
rs17527080	cg06726471	0.0541742	1.36671e-08
rs4997107	cg23216724	0.0521757	3.51859e-09
rs2052561	cg06726471	0.0495655	1.59118e-07
rs5751606	cg06040542	-0.033584	6.00631e-06
rs5759637	cg06040542	-0.033584	6.00631e-06
rs12484280	cg06040542	-0.033584	6.00631e-06
rs2236313	cg20406979	-0.0436036	2.2865e-07
rs2910926	cg06726471	0.0494472	1.47033e-07
rs61219219	cg06726471	0.0464423	5.02648e-08
rs67272103	cg08928926	0.0586046	1.46016e-08
rs860455	cg12777002	0.0472767	1.53346e-10
rs12460985	cg05840754	-0.0474475	4.61034e-06
rs8112667	cg25690897	-0.0460803	1.0356e-07
rs57425612	cg25690897	-0.0525652	6.16321e-08
rs2071434	cg06040542	-0.033451	5.54727e-06
rs6941355	cg20406979	0.0417218	4.54618e-07
rs187753759	cg09152259	0.0339708	0.000108802
rs880933	cg09152259	0.0339708	0.000108802
rs7716300	cg06726471	0.0492629	1.61458e-07
rs7715899	cg06726471	0.0492629	1.61458e-07
rs9262162	cg16586538	0.0400875	5.14673e-05
rs555209	cg19070398	-0.0469128	2.89881e-07
rs2290769	cg23470227	-0.0378346	1.6478e-06
rs525861	cg19070398	-0.0469392	2.62682e-07
rs2247314	cg20406979	-0.0433547	6.93252e-08
rs79858158	cg27246571	-0.0533504	3.36903e-06
rs12178491	cg20406979	0.0420997	5.54607e-07
rs61937885	cg27246571	-0.0550344	3.4798e-06
rs17677763	cg27246571	-0.0541587	3.165e-06
rs61937883	cg27246571	-0.0541587	3.165e-06
rs73152631	cg06040542	-0.0354031	2.6e-06
rs9366078	cg20406979	-0.0429803	7.83437e-08
rs2757053	cg20406979	-0.0429803	7.83437e-08
rs1130033	cg20406979	-0.0429803	7.83437e-08
rs57557794	cg06726471	0.0482977	2.79611e-07
rs60649342	cg06726471	0.0482977	2.79611e-07
rs16889557	cg06726471	0.0482977	2.79611e-07
rs13183947	cg06726471	0.0546735	1.80871e-08
rs7224488	cg15815084	0.0613917	6.90159e-07
rs408087	cg23216724	-0.0505562	9.16975e-09
rs12055488	cg20406979	-0.043288	1.06167e-07
rs3963512	cg20406979	-0.043288	1.06167e-07
rs9355610	cg20406979	-0.043288	1.06167e-07
rs112267124;rs767502356	cg23470227	-0.0381574	1.59758e-06
rs2239824	cg20406979	0.0420634	8.52949e-07
rs55873403	cg20406979	0.0420634	8.52949e-07
rs12193698	cg20406979	0.0420634	8.52949e-07
rs2239823	cg20406979	0.0420634	8.52949e-07
rs17677715	cg27246571	-0.0538307	2.98445e-06
rs2247315	cg20406979	-0.0441649	3.38075e-08
rs2910885	cg06726471	0.0484999	2.41294e-07
rs2910886	cg06726471	0.0484999	2.41294e-07
rs6886940	cg06726471	0.0550141	1.86936e-08
rs3867600	cg15815084	0.0620294	7.78927e-07
rs2093989	cg00302379	0.0214461	4.023e-07
rs2345568	cg20406979	-0.0443066	1.63413e-07
rs4759187	cg01297684	0.0564867	5.59511e-09
rs9426568	cg02280892	0.061713	1.44641e-09
rs9356551	cg20406979	-0.0429803	7.83437e-08
rs1951459	cg20406979	-0.0429803	7.83437e-08
rs933243	cg20406979	-0.0429803	7.83437e-08
rs112383632	cg20406979	-0.0429803	7.83437e-08
rs4710154	cg20406979	-0.0429803	7.83437e-08
rs2761207	cg19566482	0.0520912	6.86495e-11
rs407515	cg23216724	0.050468	7.80578e-09
rs406095	cg23216724	0.050468	7.80578e-09
rs4710160	cg23216724	0.050468	7.80578e-09
rs4710161	cg23216724	0.050468	7.80578e-09
rs388406	cg23216724	0.050468	7.80578e-09
rs430145	cg23216724	0.050468	7.80578e-09
rs425039	cg23216724	0.050468	7.80578e-09
rs376097	cg23216724	0.050468	7.80578e-09
rs424185	cg23216724	0.050468	7.80578e-09
rs400837	cg23216724	0.050468	7.80578e-09
rs10769148	cg03700417	-0.0634249	1.26622e-08
rs10769149	cg03700417	-0.0634249	1.26622e-08
rs5020450	cg27246571	-0.0533504	3.36903e-06
rs9457270	cg20406979	0.0421974	6.11357e-07
rs521448	cg19070398	-0.0460116	3.68635e-07
rs400063	cg23216724	-0.0505562	9.16975e-09
rs1794700	cg23216724	-0.0505562	9.16975e-09
rs77241275	cg20406979	-0.0435304	1.06251e-07
rs1157786	cg03700417	-0.0606697	9.05477e-08
rs11959553	cg06726471	0.0442438	2.01997e-08
rs4899161	cg00302379	0.0224946	2.21157e-07
rs1341334	cg02280892	0.060982	2.19533e-09
rs1341335	cg02280892	0.060982	2.19533e-09
rs2570368	cg02280892	0.060982	2.19533e-09
rs4755992	cg03700417	-0.0608821	8.92839e-08
rs67495946	cg09152259	0.0325678	0.000192509
rs71646317	cg08928926	0.0569239	4.6402e-08
rs9893344	cg12229367	0.0214773	1.25995e-07
rs7156617	cg00302379	0.0224946	2.21157e-07
rs2757041	cg20406979	-0.0443989	4.92807e-08
rs2695238	cg02280892	0.060982	2.19533e-09
rs1341333	cg02280892	0.060982	2.19533e-09
rs55842986	cg06726471	0.0549938	4.87163e-08
rs55790738	cg06726471	0.0549938	4.87163e-08
rs60744736	cg06726471	0.0549938	4.87163e-08
rs2910905	cg06726471	0.0549938	4.87163e-08
rs56227241	cg06726471	0.0571579	4.47809e-08
rs12615166	cg02893324	-0.046744	2.36325e-06
rs439553	cg23216724	-0.0499424	1.5818e-08
rs12949688	cg12229367	0.0207557	6.6891e-07
rs1568277	cg09152259	0.032533	0.000477901
rs1488667	cg03700417	-0.0586845	1.50885e-07
rs7956370	cg27246571	-0.0479203	1.39379e-05
rs702465	cg12777002	0.0464683	5.30914e-10
rs9891076	cg23470227	-0.035957	1.26601e-07
rs4755988	cg03700417	-0.0615621	3.43229e-08
rs1019512	cg06726471	0.0423971	4.95191e-08
rs4902359	cg00302379	0.0194526	1.54372e-05
rs6983152	cg19750024	-0.0234752	4.38167e-06
rs2695239	cg02280892	0.0613297	3.0331e-09
rs4710176	cg20406979	0.0404522	6.50688e-07
rs1858550	cg02280892	0.0610493	4.37372e-09
rs2570369	cg02280892	0.0608423	3.01306e-09
rs2136875	cg02280892	0.0608423	3.01306e-09
rs2695240	cg02280892	0.0608423	3.01306e-09
rs2570370	cg02280892	0.0608423	3.01306e-09
rs8008095	cg00302379	-0.020314	5.82528e-06
rs1530869	cg03700417	-0.0614697	3.99189e-08
rs2198153	cg03700417	-0.0614697	3.99189e-08
rs2199048	cg23470227	-0.0385376	1.12668e-07
rs7152277	cg00302379	-0.020049	8.1675e-06
rs10753426	cg02280892	0.0682586	1.72055e-08
rs7158239	cg00302379	-0.020203	6.41503e-06
rs8011585	cg00302379	-0.020203	6.41503e-06
rs8015921	cg00302379	-0.020203	6.41503e-06
rs2071431	cg06040542	-0.0315562	2.04966e-05
rs7150646	cg00302379	0.0195415	1.59217e-05
rs4902357	cg00302379	0.0195415	1.59217e-05
rs8006419	cg00302379	-0.0211399	8.69874e-07
rs7155454	cg00302379	-0.0211399	8.69874e-07
rs387733	cg23216724	0.0498682	1.50258e-08
rs712208	cg16119449	0.049618	2.55303e-06
rs8075002	cg02433148	0.0320258	2.02081e-06
rs4076073	cg23470227	-0.0358065	9.23324e-08
rs2427645	cg16586538	0.0444003	1.38477e-05
rs2534822	cg16586538	0.0444003	1.38477e-05
rs10928765	cg09152259	0.03192	0.000575111
rs62160265	cg09152259	0.03192	0.000575111
rs9624048	cg06040542	-0.0334145	1.1476e-05
rs9624049	cg06040542	-0.0334145	1.1476e-05
rs9624051	cg06040542	-0.0334145	1.1476e-05
rs5759635	cg06040542	-0.0334145	1.1476e-05
rs5751607	cg06040542	-0.0334145	1.1476e-05
rs305077	cg22873414	0.0390093	7.17136e-08
rs1044059	cg23216724	0.0480934	5.38717e-08
rs36103648	cg02893324	-0.0458069	4.03931e-06
rs6887245	cg06726471	0.0543245	6.10602e-08
rs62360772	cg06726471	0.0543245	6.10602e-08
rs56206837	cg06726471	0.0429412	2.11868e-08
rs2665957	cg23470227	-0.0358065	9.23324e-08
rs34184001	cg00302379	0.0201394	3.67022e-06
rs59928617	cg05840754	-0.0499526	0.000658744
rs7218498	cg23470227	-0.0358065	9.23324e-08
rs2608880	cg23470227	-0.0358065	9.23324e-08
rs1858548	cg02280892	0.0611879	4.16293e-09
rs1858549	cg02280892	0.0611879	4.16293e-09
rs8137846	cg06040542	-0.0332307	1.41084e-05
rs3682	cg23470227	-0.035693	2.01891e-07
rs2046046	cg17430199	-0.03743	1.0985e-05
rs1019129	cg15361247	0.0489638	1.31771e-09
rs4793912	cg12229367	0.0211133	1.93348e-07
rs2292980	cg22873414	0.0370868	2.12394e-07
rs12691486	cg08928926	0.054652	5.00732e-08
rs2963977	cg06726471	0.0427251	9.45629e-08
rs11959574	cg06726471	0.0424037	4.57664e-08
rs62363268	cg06726471	0.0424037	4.57664e-08
rs4307102	cg06726471	0.0424037	4.57664e-08
rs4075638	cg06726471	0.0424037	4.57664e-08
rs1079991	cg16586538	0.0423685	2.4411e-05
rs8138361	cg06040542	-0.0334145	1.1476e-05
rs2071433	cg06040542	-0.032702	1.63245e-05
rs13086609	cg15361247	0.0478687	2.4462e-09
rs2673062	cg15361247	0.0478687	2.4462e-09
rs2673032	cg15361247	0.0479587	1.93676e-09
rs2673031	cg15361247	0.0479587	1.93676e-09
rs2742394	cg15361247	0.0479587	1.93676e-09
rs2673030	cg15361247	0.0479587	1.93676e-09
rs2742395	cg15361247	0.0479587	1.93676e-09
rs2673029	cg15361247	0.0479587	1.93676e-09
rs2742398	cg15361247	0.0479587	1.93676e-09
rs2064063	cg15361247	0.0479587	1.93676e-09
rs2064064	cg15361247	0.0479587	1.93676e-09
rs2064062	cg15361247	0.0479587	1.93676e-09
rs2742448	cg15361247	0.0479587	1.93676e-09
rs2742449	cg15361247	0.0479587	1.93676e-09
rs2742453	cg15361247	0.0479587	1.93676e-09
rs2742455	cg15361247	0.0479587	1.93676e-09
rs2742458	cg15361247	0.0479587	1.93676e-09
rs1468542	cg15361247	0.0479587	1.93676e-09
rs2742372	cg15361247	0.0479587	1.93676e-09
rs2742374	cg15361247	0.0479587	1.93676e-09
rs2742375	cg15361247	0.0479587	1.93676e-09
rs11547070;rs67739766;rs796745954;rs397714906	cg15361247	0.0479587	1.93676e-09
rs2666003	cg23470227	-0.0357477	1.13212e-07
rs2742370	cg15361247	0.0480858	2.10229e-09
rs2673066	cg15361247	0.0479587	1.93676e-09
rs2531755	cg15361247	0.0479587	1.93676e-09
rs2673055	cg15361247	0.0479587	1.93676e-09
rs2253979	cg15361247	0.0479587	1.93676e-09
rs11709306	cg15361247	0.0479587	1.93676e-09
rs9826208	cg15361247	0.0479587	1.93676e-09
rs2742464	cg15361247	0.0479587	1.93676e-09
rs7631818	cg15361247	0.0479587	1.93676e-09
rs6807438	cg15361247	0.0479587	1.93676e-09
rs13059502	cg15361247	0.0479587	1.93676e-09
rs2742371	cg15361247	0.0479587	1.93676e-09
rs726668	cg00302379	-0.0208892	2.61991e-06
rs9675156	cg23470227	-0.0357477	1.13212e-07
rs6501843	cg23470227	-0.0357477	1.13212e-07
rs4788913	cg23470227	-0.0357477	1.13212e-07
rs11627485	cg00302379	0.0186823	3.67433e-05
rs75468875	cg23747839	-0.0365888	1.89729e-06
rs10852766	cg23470227	-0.0357107	1.3016e-07
rs9674966	cg23470227	-0.0356158	2.46866e-07
rs12435835	cg00302379	-0.020065	4.88009e-07
rs1135640	cg23470227	-0.035521	1.2475e-07
rs56248937	cg23470227	-0.0358065	9.23324e-08
rs17737199	cg16609459	-0.0401954	5.53081e-07
rs4762293	cg16609459	-0.0401954	5.53081e-07
rs4075637	cg06726471	0.0424037	4.57664e-08
rs10928766	cg09152259	0.0300347	0.00113825
rs1568279	cg09152259	0.0306828	0.000925355
rs62160266	cg09152259	0.0306828	0.000925355
rs55997706	cg16609459	-0.0401167	6.45069e-07
rs73223927	cg16609459	-0.0401167	6.45069e-07
rs2285147	cg20406979	0.0398722	6.07794e-07
rs12131153	cg08928926	0.0534051	8.49789e-08
rs12479451	cg19070398	0.0461658	3.89708e-07
rs6086014	cg19070398	0.0461658	3.89708e-07
rs6086019	cg19070398	0.0461658	3.89708e-07
rs2224270	cg19070398	0.0461658	3.89708e-07
rs2742463	cg15361247	0.047773	4.07215e-09
rs3760128	cg23470227	-0.036675	3.26205e-07
rs35033486	cg06726471	0.0528078	6.58262e-08
rs11948747	cg06726471	0.0541632	1.04237e-07
rs3769157	cg02893324	-0.0378968	1.9599e-05
rs2781375	cg00302379	-0.0191168	1.13986e-05
rs62160287	cg09152259	0.0322196	0.000550975
rs56023660	cg16609459	-0.0398731	8.30721e-07
rs11900469	cg09152259	0.0300347	0.00113825
rs9895947	cg23470227	-0.0360207	2.64505e-07
rs8005829	cg00302379	-0.019099	1.26061e-05
rs2071436	cg06040542	-0.0342697	1.55964e-05
rs4762297	cg16609459	-0.0398731	8.30721e-07
rs56215869	cg06726471	0.0441846	1.74022e-07
rs8068749	cg23470227	-0.036608	2.82913e-07
rs4605081	cg00302379	-0.0197582	7.92257e-07
rs7155275	cg00302379	-0.0197591	8.62849e-07
rs13029949	cg02893324	-0.0454851	3.69203e-06
rs71417423	cg02893324	-0.0454851	3.69203e-06
rs12998711	cg02893324	-0.0454851	3.69203e-06
rs10151162	cg00302379	-0.0190949	1.62406e-05
rs6662763	cg23747839	-0.0355721	2.28368e-06
rs4658148	cg23747839	-0.0355721	2.28368e-06
rs11804939	cg23747839	-0.0355721	2.28368e-06
rs10922617	cg23747839	-0.0355721	2.28368e-06
rs10801729	cg23747839	-0.0355721	2.28368e-06
rs1957948	cg00302379	-0.0191699	1.55973e-05
rs942626	cg00302379	-0.0191699	1.55973e-05
rs7159443	cg00302379	-0.0191699	1.55973e-05
rs8010213	cg00302379	-0.0191699	1.55973e-05
rs1998688	cg00302379	-0.0191699	1.55973e-05
rs1256417	cg00302379	-0.0191699	1.55973e-05
rs1124752	cg00302379	-0.0191699	1.55973e-05
rs2781373	cg00302379	-0.0191858	1.641e-05
rs2781374	cg00302379	-0.0191858	1.641e-05
rs1953232	cg00302379	-0.0191858	1.641e-05
rs2763888	cg00302379	-0.0191858	1.641e-05
rs9624050	cg06040542	-0.034123	1.96008e-05
rs2467100	cg23470227	-0.0351561	3.90256e-07
rs11939254	cg27569037	0.0535737	4.01539e-07
rs7607690	cg11878712	0.0410813	1.37877e-05
rs433191	cg23216724	0.0480057	6.09614e-08
rs35410051	cg00302379	-0.0198686	7.66204e-06
rs56413023	cg06726471	0.0436878	2.36148e-08
rs386708492;rs115898938	cg17501210	-0.11949	2.73454e-08
rs2673075	cg15361247	0.0470346	4.50626e-09
rs1270074	cg00302379	-0.0203721	4.13618e-06
rs4902360	cg00302379	-0.0204471	3.98078e-06
rs1271582	cg00302379	-0.0204471	3.98078e-06
rs35520739	cg00302379	-0.0192876	1.25201e-05
rs2151755	cg00302379	-0.0192527	1.40252e-05
rs7185022	cg22873414	-0.035026	3.0562e-06
rs942628	cg00302379	-0.0191624	1.63963e-05
rs10201047	cg09152259	0.0313422	0.000871822
rs7134580	cg16609459	-0.0396142	9.84439e-07
rs1982221	cg16609459	-0.0396142	9.84439e-07
rs1899044	cg16609459	-0.0396142	9.84439e-07
rs141043350	cg16609459	-0.0396142	9.84439e-07
rs73229022	cg16609459	-0.0396142	9.84439e-07
rs13004212	cg02893324	-0.0429331	1.31551e-05
rs7134030	cg16609459	-0.039754	1.07516e-06
rs942629	cg00302379	-0.0187594	1.70897e-05
rs9302994	cg23470227	-0.0353937	8.76404e-07
rs2524222	cg16586538	0.0324233	4.38401e-05
rs2757042	cg23216724	0.0465642	2.01477e-07
rs7536471	cg08928926	0.0489016	2.56713e-07
rs2180465	cg19070398	0.04336	2.1731e-06
rs55872768	cg23470227	-0.0356098	5.60849e-07
rs34346314	cg19750024	-0.0211911	0.000316236
rs571462992;rs1270073	cg00302379	-0.0190737	1.88766e-05
rs61241561	cg06726471	0.0440156	3.56841e-08
rs2305913	cg23470227	-0.0346101	2.5482e-07
rs147445348	cg09152259	0.0292553	0.00243699
rs1124751	cg00302379	0.0192181	1.67e-05
rs34459643	cg00302379	0.0191948	1.39973e-05
rs7958080	cg16609459	-0.0398731	8.30721e-07
rs2068208	cg06726471	0.0512146	3.25199e-07
rs2877263	cg06726471	0.0430898	3.94806e-08
rs2280378	cg22873414	0.0340256	2.72853e-06
rs9674908	cg23470227	-0.0384363	1.02473e-07
rs147668505;rs201687792;rs201693487;rs386820039;rs55675235	cg06040542	-0.0326054	2.8366e-05
rs147668505;rs201687792;rs386820039;rs200959762;rs56254210	cg06040542	-0.0326054	2.8366e-05
rs55716817	cg20859453	0.0944145	5.38577e-09
rs62551155	cg20859453	0.0944145	5.38577e-09
rs35352238	cg25690897	-0.0498174	3.99456e-08
rs1042337	cg09017117	0.0357468	4.8186e-06
rs35175134	cg06726471	0.0512888	8.17335e-08
rs13172839	cg06726471	0.0512888	8.17335e-08
rs13186757	cg06726471	0.0512888	8.17335e-08
rs11952984	cg06726471	0.0512888	8.17335e-08
rs62551157	cg20859453	0.0944324	6.30497e-09
rs3744015	cg23470227	-0.035339	7.08689e-07
rs6086016	cg19070398	0.0431008	2.82069e-06
rs113841236	cg20859453	0.0936901	7.53887e-09
rs12750816	cg08928926	0.0500737	2.92891e-07
rs11620955	cg00302379	-0.020506	1.12217e-06
rs1123329	cg06726471	0.0438614	2.50397e-08
rs4434059	cg19070398	0.043683	1.93365e-06
rs12481089	cg19070398	0.0436555	2.10533e-06
rs1120554	cg19070398	0.0436555	2.10533e-06
rs1120555	cg19070398	0.0436555	2.10533e-06
rs4820542	cg06040542	-0.0329807	1.98002e-05
rs2071435	cg06040542	-0.0291162	6.75248e-05
rs3754744	cg02893324	-0.0452704	4.0626e-06
rs142772497	cg16609459	-0.039095	1.31578e-06
rs7314551	cg16609459	-0.039095	1.31578e-06
rs73227396	cg16609459	-0.039095	1.31578e-06
rs7138597	cg16609459	-0.039095	1.31578e-06
rs7355659	cg09152259	0.0293527	0.000269717
rs72905080	cg02893324	-0.0433881	8.99995e-06
rs12986917	cg02893324	-0.0433881	8.99995e-06
rs17302977	cg02893324	-0.0433881	8.99995e-06
rs12997078	cg02893324	-0.0433881	8.99995e-06
rs3769194	cg02893324	-0.0433881	8.99995e-06
rs11868308	cg23470227	-0.0338869	3.48629e-05
rs11948227	cg06726471	0.0443524	6.21697e-08
rs56270170	cg06726471	0.0443524	6.21697e-08
rs57425852	cg06726471	0.0443524	6.21697e-08
rs6538704	cg16609459	-0.039095	1.31578e-06
rs4344319	cg23747839	-0.035516	2.63388e-06
rs10520992	cg06726471	0.042927	4.16714e-07
rs12080531	cg08928926	0.051354	4.59403e-07
rs3754743	cg02893324	-0.0449633	4.72018e-06
rs7533587	cg08928926	0.0453679	3.99432e-07
rs56193548	cg02893324	-0.0436164	8.79637e-06
rs35250703	cg02893324	-0.0436164	8.79637e-06
rs4899159	cg00302379	-0.0194416	1.92323e-06
rs8012008	cg00302379	-0.0194416	1.92323e-06
rs11627531	cg00302379	-0.0194416	1.92323e-06
rs828852	cg12777002	0.046275	2.73139e-09
rs3087520	cg16609459	-0.0389656	1.54627e-06
rs7973968	cg16609459	-0.0411126	8.25998e-07
rs2292982	cg22873414	0.0369465	6.30605e-07
rs4902363	cg00302379	0.0195967	1.80614e-06
rs11623603	cg00302379	0.0195967	1.80614e-06
rs3884509	cg06726471	0.0446721	6.62538e-08
rs12164635	cg08928926	0.05126	3.88135e-07
rs2844731	cg16586538	0.0457375	1.00328e-05
rs12120065	cg08928926	0.0491642	4.00703e-07
rs36125997	cg08928926	0.0491642	4.00703e-07
rs11870883	cg23470227	-0.0336841	4.35382e-05
rs11087768	cg19070398	0.0426556	4.69846e-06
rs11087769	cg19070398	0.0426556	4.69846e-06
rs10854267	cg19070398	0.0426556	4.69846e-06
rs12625396	cg19070398	0.0426556	4.69846e-06
rs12624697	cg19070398	0.0426556	4.69846e-06
rs1866631	cg02893324	0.0393403	7.55244e-06
rs6425724	cg08928926	0.0490188	3.72932e-07
rs61780094	cg08928926	0.0483391	3.98192e-07
rs12730052	cg08928926	0.0483391	3.98192e-07
rs3769187	cg02893324	-0.044729	4.78504e-06
rs2411994	cg00302379	-0.0185361	1.42132e-05
rs5751603	cg06040542	-0.0345009	1.54555e-05
rs73152620	cg06040542	-0.0345009	1.54555e-05
rs73152621	cg06040542	-0.0345009	1.54555e-05
rs2267008	cg06040542	-0.0345009	1.54555e-05
rs713617	cg06040542	-0.0345009	1.54555e-05
rs828887	cg12777002	0.0460795	2.83742e-09
rs2395296	cg09017117	0.0343468	8.05796e-07
rs4507504	cg06726471	0.0431044	4.4211e-08
rs5759611	cg06040542	-0.0326054	2.8366e-05
rs7555730	cg23747839	-0.0360023	7.35976e-06
rs1299858	cg02280892	0.0555552	5.01842e-06
rs11948580	cg06726471	0.0506492	1.54533e-07
rs928655	cg23747839	-0.0338968	4.9613e-06
rs17527362	cg06726471	0.0495596	2.28443e-07
rs36102078	cg02893324	-0.0426967	1.19133e-05
rs398278	cg23216724	0.0451227	6.88641e-07
rs10922620	cg23747839	-0.035617	9.7282e-06
rs6693600	cg23747839	-0.035617	9.7282e-06
rs6698601	cg23747839	-0.035617	9.7282e-06
rs2247325	cg20406979	-0.0426812	3.07352e-07
rs4346838	cg23216724	0.0460807	3.64814e-07
rs2345572	cg23216724	0.0460807	3.64814e-07
rs2761206	cg19566482	0.0520403	1.18736e-09
rs62361352	cg06726471	0.0426185	5.37131e-07
rs34472765	cg02893324	-0.0433413	1.0659e-05
rs57798520	cg06726471	0.0451387	4.09044e-08
rs6086005	cg19070398	0.0427175	4.31486e-06
rs6086006	cg19070398	0.0427175	4.31486e-06
rs3769199	cg02893324	-0.0426967	1.19133e-05
rs12989116	cg02893324	-0.0426967	1.19133e-05
rs803420	cg16119449	-0.0350202	8.13606e-05
rs1667610	cg12777002	0.046275	2.73139e-09
rs828891	cg12777002	0.046275	2.73139e-09
rs12052293	cg09152259	0.0284019	9.73623e-05
rs12145697	cg08928926	0.0482831	4.74993e-07
rs2106109	cg06040542	-0.0326054	2.8366e-05
rs34702663	cg02893324	-0.0423577	1.49432e-05
rs3769192	cg02893324	-0.0423577	1.49432e-05
rs9457268	cg20406979	0.0370602	4.24765e-06
rs6902119	cg20406979	0.0370602	4.24765e-06
rs11948653	cg06726471	0.0495596	2.28443e-07
rs10493047	cg08928926	0.0479383	6.129e-07
rs2963988	cg06726471	0.0473751	1.3148e-07
rs112064774	cg06040542	-0.0339613	2.39466e-05
rs2267009	cg06040542	-0.0339613	2.39466e-05
rs13155643	cg06726471	0.0494758	2.5723e-07
rs377232	cg23216724	-0.0469513	1.14961e-07
rs9388712	cg14411190	0.0164042	1.97326e-05
rs11950388	cg06726471	0.0431104	2.03814e-07
rs13173184	cg06726471	0.0495903	2.27791e-07
rs2330956	cg06726471	0.0495903	2.27791e-07
rs2330955	cg06726471	0.0495903	2.27791e-07
rs16834397	cg08928926	0.0489307	5.5821e-07
rs12139997	cg08928926	0.0489307	5.5821e-07
rs7342	cg23470227	-0.0427473	1.22194e-06
rs1667600	cg12777002	0.0457104	1.98036e-09
rs828893	cg12777002	0.0461747	1.67085e-09
rs2071432	cg06040542	-0.0333179	2.861e-05
rs7024344	cg20859453	0.0898367	2.16645e-08
rs11585765	cg02280892	0.0620227	5.42934e-07
rs4239205	cg15815084	0.0576128	1.31728e-05
rs2910922	cg06726471	0.0472967	1.54737e-07
rs1150772	cg16586538	0.0423746	3.30464e-05
rs6886041	cg06726471	0.0490626	3.42072e-07
rs2571588	cg14411190	0.0162868	3.74997e-05
rs12987496	cg02893324	-0.0422472	1.58876e-05
rs6425726	cg08928926	0.0481083	6.4931e-07
rs12133730	cg08928926	0.0481083	6.4931e-07
rs34353623	cg08928926	0.0481083	6.4931e-07
rs34563758	cg08928926	0.0481083	6.4931e-07
rs12135033	cg08928926	0.0481083	6.4931e-07
rs57186798	cg08928926	0.0481083	6.4931e-07
rs56105061	cg08928926	0.0481083	6.4931e-07
rs12136523	cg08928926	0.0481083	6.4931e-07
rs12755701	cg08928926	0.0481083	6.4931e-07
rs2149093	cg23216724	0.0445239	6.55928e-07
rs444988	cg23216724	0.0445239	6.55928e-07
rs408080	cg23216724	0.0445239	6.55928e-07
rs1794696	cg23216724	0.0445239	6.55928e-07
rs404222	cg23216724	0.0445239	6.55928e-07
rs9612244	cg06040542	-0.0326054	2.8366e-05
rs5759604	cg06040542	-0.0326054	2.8366e-05
rs5759607	cg06040542	-0.0326054	2.8366e-05
rs5759616	cg06040542	-0.0326054	2.8366e-05
rs3811975	cg06726471	0.0487153	3.31211e-07
rs7289172	cg06040542	-0.0295009	0.000177979
rs9997069	cg27569037	0.0441494	1.69835e-06
rs56178148	cg16609459	-0.039928	1.01351e-06
rs774695918;rs175868	cg16119449	-0.0328784	0.000197843
rs996122	cg03700417	-0.059675	3.07717e-07
rs175870	cg16119449	-0.034475	0.000163501
rs4586342	cg00302379	-0.0185074	4.44094e-06
rs1727028	cg02280892	0.0576412	3.3227e-06
rs7148590	cg00302379	-0.0185097	4.77381e-06
rs7036684	cg20859453	0.090905	2.05556e-08
rs34896288	cg06726471	0.0487153	3.31211e-07
rs10461913	cg06726471	0.0487153	3.31211e-07
rs9348211	cg23216724	0.0444207	7.25151e-07
rs6920364	cg23216724	0.0444207	7.25151e-07
rs2769352	cg23216724	0.0444207	7.25151e-07
rs1811120	cg23216724	0.0444207	7.25151e-07
rs427824	cg23216724	0.0444207	7.25151e-07
rs364451	cg23216724	0.0444207	7.25151e-07
rs9292460	cg06726471	0.0450252	3.2353e-07
rs239934	cg23216724	0.0449745	9.41291e-07
rs2047068	cg06726471	0.0421881	9.27031e-07
rs36108975	cg09152259	0.0281678	0.0001318
rs9915572	cg02433148	0.0261607	5.0853e-05
rs9717862	cg23216724	0.0446203	4.82403e-07
rs17436575	cg06726471	0.0489298	4.21562e-07
rs62360821	cg06726471	0.0489298	4.21562e-07
rs1051489	cg06726471	0.0489298	4.21562e-07
rs10520994	cg06726471	0.0489298	4.21562e-07
rs11956648	cg06726471	0.0489298	4.21562e-07
rs10461912	cg06726471	0.0489298	4.21562e-07
rs4296817	cg06726471	0.0489298	4.21562e-07
rs71629079	cg06726471	0.0489298	4.21562e-07
rs62361351	cg06726471	0.0427746	1.86616e-07
rs4562053	cg06726471	0.0427746	1.86616e-07
rs512236	cg19070398	-0.042247	8.39094e-06
rs9913193	cg02433148	0.0264933	3.76171e-05
rs9903097	cg15815084	0.0413483	3.24249e-05
rs1533141	cg06900004	-0.0573761	1.30992e-06
rs35755171	cg06900004	-0.0585639	7.9166e-07
rs34085561	cg06726471	0.0471401	3.02817e-06
rs10461911	cg06726471	0.0471401	3.02817e-06
rs931941	cg06726471	0.0471401	3.02817e-06
rs13171708	cg06726471	0.0471401	3.02817e-06
rs1505571	cg08928926	0.0481083	6.4931e-07
rs239935	cg23216724	0.0445658	1.10544e-06
rs4630794	cg12777002	0.0440935	4.92583e-09
rs3733797	cg09849319	0.0373983	1.16972e-05
rs12053248	cg09152259	0.0278525	0.000153691
rs67719248	cg02893324	-0.0413728	2.79021e-05
rs828861	cg12777002	0.0440935	4.92583e-09
rs2254828	cg15361247	-0.0409627	4.72885e-08
rs714932	cg06726471	0.0489708	2.98497e-07
rs10941004	cg06726471	0.0489708	2.98497e-07
rs2331007	cg06726471	0.0489708	2.98497e-07
rs13190134	cg06726471	0.0489708	2.98497e-07
rs71629080	cg06726471	0.0489708	2.98497e-07
rs23544	cg09017117	-0.0309957	5.87384e-06
rs6431232	cg09152259	0.0249799	0.00216589
rs7729980	cg06726471	0.0413745	1.48226e-07
rs2963959	cg06726471	0.0413905	1.60263e-07
rs34866549	cg06900004	-0.0575223	1.07157e-06
rs2176744	cg15815084	0.0409069	3.96152e-05
rs71324126	cg06900004	-0.057486	1.69222e-06
rs35755253	cg06900004	-0.058705	1.02416e-06
rs11959760	cg06726471	0.0427098	2.51336e-07
rs2019106	cg06726471	0.0472602	7.97847e-07
rs664852	cg01355089	0.0414958	1.59574e-05
rs664524	cg01355089	0.0414958	1.59574e-05
rs7146939	cg00302379	-0.0176157	4.50159e-05
rs2963990	cg06726471	0.0456692	3.62372e-07
rs13321439	cg06900004	-0.0563853	7.44696e-07
rs13321440	cg06900004	-0.0563853	7.44696e-07
rs13317815	cg06900004	-0.0563853	7.44696e-07
rs34593533	cg06900004	-0.0563853	7.44696e-07
rs521527	cg01355089	0.0411722	1.70083e-05
rs12119245	cg08928926	0.041108	2.95749e-06
rs893566	cg15361247	-0.0429311	7.55058e-08
rs11950407	cg06726471	0.0422083	2.17956e-07
rs504418	cg01355089	0.0408931	6.17589e-06
rs3785472	cg15815084	0.0426522	3.57276e-05
rs8078200	cg15815084	0.0426522	3.57276e-05
rs7209070	cg15815084	0.0426522	3.57276e-05
rs5759624	cg06040542	-0.031144	0.000125122
rs8060922	cg02295216	-0.0418302	1.05709e-05
rs7160656	cg00302379	-0.0176085	4.58858e-05
rs2271898	cg15815084	0.0408068	3.92674e-05
rs4793835	cg15815084	0.0408068	3.92674e-05
rs9908291	cg15815084	0.0408068	3.92674e-05
rs56342397	cg02893324	-0.0411185	3.16272e-05
rs11675513	cg09152259	0.0270351	0.000228765
rs768514	cg06040542	-0.031144	0.000125122
rs60743456	cg06726471	0.0421885	1.99865e-07
rs8078230	cg15815084	0.0425591	4.0763e-05
rs4602333	cg06900004	-0.0576305	1.00351e-06
rs7541442	cg08928926	0.0473813	5.37439e-07
rs11218863	cg02763813	-0.0490711	8.32306e-06
rs4505967	cg06726471	0.041417	3.54261e-07
rs11939388	cg27569037	0.0425767	5.94818e-06
rs62072709	cg15815084	0.042395	3.75334e-05
rs2113093	cg06726471	0.0455883	4.23286e-07
rs72627094	cg06900004	-0.0570478	6.72555e-07
rs72627095	cg06900004	-0.0570478	6.72555e-07
rs6803587	cg06900004	-0.0570478	6.72555e-07
rs6770052	cg06900004	-0.0570478	6.72555e-07
rs6778577	cg06900004	-0.0570478	6.72555e-07
rs58434466	cg06726471	0.0411131	3.7665e-07
rs56306930	cg06726471	0.0409775	5.09004e-07
rs59928961	cg06726471	0.0409775	5.09004e-07
rs4626351	cg06726471	0.0409842	4.44976e-07
rs4076873	cg19750024	-0.0202884	0.000688309
rs398312	cg03703031	0.0404767	6.21146e-06
rs6875215	cg06726471	0.0411131	3.7665e-07
rs7718219	cg06726471	0.0411131	3.7665e-07
rs4466998	cg00302379	-0.0176802	1.14357e-05
rs11952201	cg06726471	0.0410458	5.35432e-07
rs59953683	cg06726471	0.0410458	5.35432e-07
rs12620037	cg09152259	0.0313251	0.000825406
rs3811972	cg06726471	0.0472602	7.97847e-07
rs9905199	cg15815084	0.0399384	5.93748e-05
rs4794672	cg15815084	0.0407201	5.6118e-05
rs7218364	cg15815084	0.0407201	5.6118e-05
rs9893721	cg15815084	0.0407201	5.6118e-05
rs11954183	cg06726471	0.0497962	4.86885e-07
rs1678778	cg01355089	0.0399285	1.5794e-05
rs2047069	cg06726471	0.0420081	3.01606e-07
rs1567580	cg06900004	-0.0570152	1.21097e-06
rs1567579	cg06900004	-0.0570152	1.21097e-06
rs56261855	cg09152259	0.0308461	0.000884557
rs12233101	cg09152259	0.0308461	0.000884557
rs13058936	cg09610644	0.0398269	3.17303e-05
rs11627757	cg00302379	0.0180231	0.000134144
rs3783715	cg00302379	0.0180231	0.000134144
rs7160037	cg00302379	0.0180231	0.000134144
rs3761418	cg06040542	-0.0279065	0.000228306
rs112947658	cg06040542	-0.0279065	0.000228306
rs9897258	cg05272827	0.0216852	2.19845e-05
rs4710181	cg20406979	0.0380905	7.0397e-06
rs11158577	cg00302379	0.017528	1.49358e-05
rs2191027	cg15361247	-0.0408899	1.29688e-05
rs7534378	cg08928926	0.0456099	1.14085e-06
rs6683793	cg08928926	0.0456099	1.14085e-06
rs4794671	cg15815084	0.0404005	6.04431e-05
rs9907968	cg15815084	0.0404005	6.04431e-05
rs9902250	cg15815084	0.0404005	6.04431e-05
rs8067569	cg15815084	0.0404005	6.04431e-05
rs8067906	cg15815084	0.0404005	6.04431e-05
rs12520052	cg06726471	0.0433211	8.30405e-07
rs56100618	cg09152259	0.0308461	0.000884557
rs951545	cg08928926	0.043969	1.43163e-06
rs55761222	cg06726471	0.0421005	2.73799e-07
rs6663924	cg08928926	0.0410127	3.09026e-06
rs1505569	cg08928926	0.0410127	3.09026e-06
rs13017210	cg02893324	-0.0388656	5.77613e-05
rs17015334	cg09152259	0.0310631	0.00088508
rs2540479	cg27246571	-0.0451919	4.01923e-05
rs4897953	cg23577001	0.0352947	4.14437e-06
rs251421	cg17430199	-0.0340063	0.000333426
rs62360820	cg06726471	0.0433211	8.30405e-07
rs889318	cg06726471	0.0433211	8.30405e-07
rs2910931	cg06726471	0.0433211	8.30405e-07
rs2910882	cg06726471	0.0433211	8.30405e-07
rs4867441	cg06726471	0.0433211	8.30405e-07
rs1469105	cg06726471	0.0433211	8.30405e-07
rs367614	cg06726471	0.0433211	8.30405e-07
rs6503773	cg15815084	0.0399623	5.62395e-05
rs2008012	cg23470227	-0.0335652	5.80034e-06
rs7760495	cg20406979	0.0350965	3.69828e-05
rs7512096	cg08928926	0.04398	1.44606e-06
rs10941005	cg06726471	0.0472602	7.97847e-07
rs62361570	cg06726471	0.0472602	7.97847e-07
rs11957618	cg06726471	0.0472602	7.97847e-07
rs11626499	cg04348689	0.0275293	9.13535e-05
rs577491	cg19070398	-0.0525319	1.24956e-05
rs2540484	cg27246571	-0.0449212	3.74447e-05
rs2540481	cg27246571	-0.0449212	3.74447e-05
rs2660843	cg27246571	-0.0449627	4.10674e-05
rs7223066	cg15815084	0.0403725	6.64965e-05
rs7210030	cg15815084	0.0403725	6.64965e-05
rs3760157	cg15815084	0.0403725	6.64965e-05
rs4899160	cg00302379	0.0180231	0.000134144
rs11624169	cg00302379	0.0180231	0.000134144
rs56257952	cg06726471	0.0420081	3.01606e-07
rs11960898	cg06726471	0.0420081	3.01606e-07
rs5751602	cg06040542	-0.0277398	0.000264265
rs7775443	cg20406979	0.0378749	6.65873e-06
rs4710178	cg20406979	0.0378749	6.65873e-06
rs4710179	cg20406979	0.0378749	6.65873e-06
rs4710182	cg20406979	0.0378749	6.65873e-06
rs4710183	cg20406979	0.0378749	6.65873e-06
rs10946212	cg20406979	0.0378749	6.65873e-06
rs10946214	cg20406979	0.0378749	6.65873e-06
rs10946215	cg20406979	0.0378749	6.65873e-06
rs2039321	cg20406979	0.0378749	6.65873e-06
rs56327685	cg09152259	0.0305709	0.000909933
rs58704734	cg08928926	0.0407324	3.42771e-06
rs954748	cg06900004	-0.0571223	1.56334e-06
rs12601782	cg15815084	0.040052	7.24748e-05
rs9919713	cg25283432	-0.0146289	9.69432e-07
rs838868	cg25283432	-0.0146289	9.69432e-07
rs838867	cg25283432	-0.0146289	9.69432e-07
rs838865	cg25283432	-0.0146289	9.69432e-07
rs4460688	cg08928926	0.0407542	3.80997e-06
rs251422	cg17430199	-0.0325832	0.000712044
rs251424	cg17430199	-0.0325832	0.000712044
rs506128	cg02280892	0.0522731	1.48573e-05
rs9902931	cg15815084	0.0400094	7.26372e-05
rs67000390	cg06726471	0.0414276	4.77902e-07
rs251425	cg17430199	-0.0324892	0.000805187
rs13095317	cg09610644	0.0387807	4.13089e-05
rs1566960	cg08928926	0.0376596	7.63061e-06
rs10798848	cg08928926	0.0376596	7.63061e-06
rs12567614	cg02280892	0.0608667	1.36783e-09
rs11801168	cg02280892	0.0610721	1.79917e-09
rs9911132	cg15815084	0.0395856	8.79604e-05
rs1967425	cg09152259	0.0236157	0.00135044
rs113379819	cg23577001	0.0352947	4.14437e-06
rs2121143	cg23577001	0.0352947	4.14437e-06
rs2660844	cg27246571	-0.044832	5.16754e-05
rs555766	cg19208876	-0.0440719	1.69372e-07
rs13030174	cg09494379	-0.0275951	6.40652e-06
rs202135955;rs777721667;rs62282550;rs778246735;rs770729762	cg09610644	0.0368404	6.84445e-05
rs35457462	cg06900004	-0.0520402	4.32356e-06
rs9366089	cg20406979	0.0378749	8.23449e-06
rs12122001	cg08928926	0.0453289	2.51438e-06
rs6685250	cg08928926	0.0453289	2.51438e-06
rs33917597	cg08928926	0.0443764	2.6972e-06
rs12118473	cg08928926	0.0443764	2.6972e-06
rs12123798	cg08928926	0.0443764	2.6972e-06
rs251427	cg17430199	-0.0329358	0.000710706
rs3788356	cg06040542	-0.0279065	0.000228306
rs1040261	cg15815084	0.0406812	6.1384e-05
rs35282812	cg15815084	0.0392906	9.37767e-05
rs8074637	cg15815084	0.0392906	9.37767e-05
rs9911560	cg15815084	0.0392906	9.37767e-05
rs3826295	cg15815084	0.0392906	9.37767e-05
rs8071009	cg15815084	0.0392906	9.37767e-05
rs13171366	cg06726471	0.0474002	5.26835e-07
rs2574796	cg19208876	-0.0440719	1.69372e-07
rs71629078	cg06726471	0.0468415	1.09648e-06
rs12097884	cg08928926	0.0398828	2.81911e-06
rs4820541	cg06040542	-0.0312181	5.3605e-05
rs12724265	cg08928926	0.0394235	3.55962e-06
rs2673068	cg15361247	0.0414699	1.82238e-07
rs10946213	cg20406979	0.0372865	1.21794e-05
rs1992554	cg15815084	0.0391861	0.000105607
rs4662748	cg09152259	0.0274241	0.000441546
rs3743716	cg02295216	-0.0405605	3.51483e-05
rs4949371	cg08928926	0.0413177	2.36064e-06
rs7765739	cg20406979	0.0360785	1.59058e-05
rs11727868	cg27569037	0.0429214	4.77426e-06
rs3935253	cg06900004	-0.0576775	3.55406e-06
rs7652042	cg15361247	-0.0445232	5.7298e-07
rs10496663	cg09152259	0.0300232	0.00145041
rs10914347	cg08928926	0.039589	2.31681e-06
rs7774396	cg20406979	0.0358051	1.5668e-05
rs6503774	cg15815084	0.0388506	0.000114047
rs3959524	cg15815084	0.0388506	0.000114047
rs9899453	cg15815084	0.0388506	0.000114047
rs7225346	cg15815084	0.0388506	0.000114047
rs3760158	cg15815084	0.0388506	0.000114047
rs9913602	cg15815084	0.0388506	0.000114047
rs2049061	cg15815084	0.0388506	0.000114047
rs2049062	cg15815084	0.0388506	0.000114047
rs112236066	cg09849319	0.0374402	9.08226e-06
rs11690086	cg09152259	0.0300629	0.00129437
rs12053309	cg09152259	0.0300629	0.00129437
rs10928769	cg09152259	0.0300629	0.00129437
rs11682864	cg09152259	0.0300629	0.00129437
rs3732205	cg09152259	0.0300629	0.00129437
rs2288655	cg09152259	0.0300629	0.00129437
rs12616200	cg09152259	0.0300629	0.00129437
rs11681225	cg09152259	0.0300629	0.00129437
rs9457273	cg20406979	0.0357478	1.52752e-05
rs62156576	cg09152259	0.0308461	0.000884557
rs11129128	cg06900004	-0.0583482	2.44975e-06
rs7642375	cg09610644	0.0381238	3.41671e-05
rs13004906	cg09152259	0.0270184	0.00049865
rs1956459	cg01751040	0.0175594	4.95054e-05
rs6741675	cg02893324	-0.0367809	8.07556e-05
rs725131	cg02295216	-0.0400094	3.86437e-05
rs204293	cg20406979	-0.0370156	7.47736e-06
rs10946211	cg20406979	-0.0370156	7.47736e-06
rs7749827	cg20406979	-0.0370156	7.47736e-06
rs9364891	cg20406979	-0.0370156	7.47736e-06
rs477568	cg19208876	-0.0454259	9.39236e-08
rs482422	cg19208876	-0.0454259	9.39236e-08
rs13015157	cg09152259	0.0274241	0.000441546
rs930139	cg09152259	0.0270565	0.000512957
rs13022800	cg02893324	-0.0374031	9.06412e-05
rs67422536	cg02893324	-0.0374031	9.06412e-05
rs62156572	cg09152259	0.029843	0.00123854
rs35998242	cg08928926	0.0394404	5.94299e-06
rs13006453	cg09152259	0.0270184	0.00049865
rs10928775	cg09152259	0.0270184	0.00049865
rs12052284	cg09152259	0.0270184	0.00049865
rs9897759	cg15815084	0.0385974	0.00013528
rs878366	cg02280892	0.0570736	8.26966e-09
rs34773782	cg04348689	0.0270007	0.000136321
rs2249692	cg06040542	-0.0306812	7.66878e-05
rs9612251	cg06040542	-0.0306812	7.66878e-05
rs10914374	cg08928926	0.0376596	7.63061e-06
rs10075910	cg06726471	0.042255	1.85504e-06
rs3783721	cg00302379	0.0174357	0.000191915
rs34746219	cg08928926	0.0449627	3.54945e-06
rs12141835	cg08928926	0.0449627	3.54945e-06
rs35282110	cg08928926	0.0449627	3.54945e-06
rs61780773	cg08928926	0.0449627	3.54945e-06
rs4663114	cg09152259	0.0247632	0.00114797
rs10853015	cg27023597	-0.0396273	1.17051e-05
rs5759638	cg06040542	-0.027506	0.000204171
rs6638	cg22873414	-0.0308496	2.55923e-05
rs628573	cg19070398	-0.0522603	1.69041e-05
rs1672879	cg25283432	-0.0149603	4.0681e-06
rs165281	cg14164816	0.0343678	0.000670684
rs868119094;rs398120022	cg23470227	-0.0374747	3.03851e-07
rs533584	cg19208876	-0.0448456	1.69847e-07
rs68600	cg09017117	-0.0266352	8.61862e-05
rs74749044	cg17927313	-0.0173191	2.24206e-07
rs72986421	cg23577001	0.0349055	7.9793e-06
rs7251926	cg23577001	0.0349055	7.9793e-06
rs4897952	cg23577001	0.0349055	7.9793e-06
rs6672651	cg08928926	0.0445942	3.95473e-06
rs6677172	cg02280892	0.0585529	3.90082e-09
rs10915986	cg02280892	0.0585529	3.90082e-09
rs11637329	cg17927313	-0.0173191	2.24206e-07
rs6425729	cg08928926	0.0442528	3.98387e-06
rs12131841	cg08928926	0.0442528	3.98387e-06
rs7542403	cg08928926	0.0442528	3.98387e-06
rs7555364	cg08928926	0.0442528	3.98387e-06
rs7513215	cg08928926	0.0442528	3.98387e-06
rs34556466	cg08928926	0.0442528	3.98387e-06
rs61779439	cg08928926	0.0442528	3.98387e-06
rs7556591	cg08928926	0.0442528	3.98387e-06
rs35068862	cg08928926	0.0442528	3.98387e-06
rs251420	cg17430199	-0.0306291	0.00143479
rs705092	cg09152259	0.0269169	0.000583439
rs10928774	cg09152259	0.0270565	0.000512957
rs12053039	cg09152259	0.0270565	0.000512957
rs12052654	cg09152259	0.0270565	0.000512957
rs8177177	cg13238348	0.0271386	0.000125456
rs17261964	cg09152259	0.0270184	0.00049865
rs11691981	cg09152259	0.0270184	0.00049865
rs9863176	cg06900004	-0.0533812	5.18333e-06
rs4794673	cg15815084	0.0388399	0.000225241
rs8040326	cg17927313	-0.0177073	1.62583e-07
rs7193473	cg02295216	-0.0384261	3.64185e-05
rs251418	cg17430199	-0.0323863	0.00101162
rs10474500	cg17430199	-0.0376202	7.50007e-05
rs11648480	cg27208925	-0.0322106	9.27771e-05
rs11084956	cg23577001	0.0349055	7.9793e-06
rs11883060	cg23577001	0.0349055	7.9793e-06
rs11879189	cg23577001	0.0349055	7.9793e-06
rs324433	cg06726471	0.0414337	2.00474e-06
rs7254312	cg05840754	-0.0427316	0.00158501
rs114578504	cg05840754	-0.0427316	0.00158501
rs9837939	cg06900004	-0.0545373	1.5558e-06
rs11633478	cg17927313	-0.0176128	1.51403e-07
rs113828774	cg17927313	-0.0173191	2.24206e-07
rs903203	cg22873414	0.033847	1.26931e-05
rs251419	cg17430199	-0.0306677	0.00156221
rs9809225	cg06900004	-0.0481825	2.35602e-05
rs165005	cg14164816	0.031127	0.000531728
rs1503960	cg04348689	0.0308073	0.000146502
rs55675018	cg17927313	-0.0176128	1.51403e-07
rs3130642	cg16586538	0.0273649	0.000134371
rs35414948	cg09610644	0.0380872	7.07412e-05
rs12993290	cg09494379	-0.0270791	6.59704e-06
rs13025791	cg09152259	0.0273624	0.000333612
rs761938012;rs13025959	cg09152259	0.0273624	0.000333612
rs975822	cg20406979	-0.0371034	7.8966e-06
rs55869686	cg17927313	-0.0171595	2.93142e-07
rs112729666	cg17927313	-0.0171595	2.93142e-07
rs11638669	cg17927313	-0.0171595	2.93142e-07
rs4777615	cg17927313	-0.0171595	2.93142e-07
rs113749270	cg17927313	-0.0171595	2.93142e-07
rs79793025	cg17927313	-0.0171595	2.93142e-07
rs56184999	cg17927313	-0.0171595	2.93142e-07
rs75454665	cg17927313	-0.0171595	2.93142e-07
rs79385562	cg17927313	-0.0171595	2.93142e-07
rs2540495	cg27246571	-0.0343955	1.39285e-05
rs5751596	cg06040542	-0.0315826	6.48637e-05
rs1684048	cg17927313	-0.0171828	2.59749e-07
rs1719288	cg17927313	-0.0171828	2.59749e-07
rs6679005	cg08928926	0.0374822	9.03741e-06
rs1110650	cg15361247	-0.0412572	4.48538e-07
rs6663779	cg08928926	0.0392419	6.01181e-06
rs7533537	cg08928926	0.0392419	6.01181e-06
rs16834408	cg08928926	0.0392419	6.01181e-06
rs7246029	cg23577001	0.0336462	1.75719e-05
rs3766287	cg08928926	0.0399902	5.76983e-06
rs4949377	cg08928926	0.0399437	5.16485e-06
rs17102423	cg00302379	0.0156766	0.000134271
rs12150106	cg15815084	0.0426522	3.57276e-05
rs12150100	cg15815084	0.0426522	3.57276e-05
rs45604339	cg00302379	0.0179076	0.000161588
rs2404529	cg09152259	0.024603	0.00132476
rs8071655	cg12582317	0.0360468	1.84774e-05
rs4481157	cg13238348	0.0267337	0.000186109
rs10914357	cg08928926	0.038764	6.35316e-06
rs1565222	cg03700417	-0.0547671	1.34702e-06
rs2540496	cg27246571	-0.0339642	1.74698e-05
rs6658828	cg08928926	0.0366276	1.12839e-05
rs1684036	cg17927313	-0.0169748	3.6558e-07
rs12977108	cg25690897	-0.0341125	1.24353e-05
rs2292165	cg08928926	0.0405667	3.85746e-06
rs2078517	cg15815084	0.0373799	0.000279801
rs2898863	cg00302379	0.0155136	0.000521704
rs10211291	cg09152259	0.0230813	0.00200159
rs365228	cg03703031	0.0371984	3.40748e-05
rs572093	cg19208876	-0.0436444	3.09668e-07
rs10404014	cg25690897	-0.0361689	8.5092e-06
rs1659561	cg03703031	-0.0478075	1.8503e-06
rs543057;rs112400634	cg12368752	-0.0255338	5.3789e-06
rs11880770	cg23577001	0.0352319	1.13527e-05
rs1158789	cg01751040	0.0177094	9.04684e-05
rs66748093	cg15361247	-0.040097	1.11861e-06
rs11038480	cg03700417	-0.0528545	2.86302e-06
rs701107	cg25283432	-0.0142475	9.07792e-06
rs11684148	cg09152259	0.0255539	0.000790439
rs2152351	cg23747839	-0.0317639	9.29009e-05
rs2152352	cg23747839	-0.0317639	9.29009e-05
rs972314	cg23747839	-0.0317639	9.29009e-05
rs972315	cg23747839	-0.0317639	9.29009e-05
rs7511795	cg23747839	-0.0317639	9.29009e-05
rs9427975	cg23747839	-0.0317639	9.29009e-05
rs9427976	cg23747839	-0.0317639	9.29009e-05
rs12145450	cg08928926	0.0362616	1.52185e-05
rs4658354	cg23747839	-0.0317009	9.00133e-05
rs4658359	cg23747839	-0.0317009	9.00133e-05
rs8004805	cg00302379	0.0156139	0.000252225
rs11108372	cg27246571	-0.0297104	0.000145657
rs12999051	cg09494379	-0.0258674	1.42743e-05
rs3093023	cg20406979	0.0311281	0.000236038
rs11626156	cg00302379	0.0153258	0.000472942
rs11622158	cg04348689	0.029187	0.000296362
rs7048739	cg08562586	-0.0507724	2.76454e-07
rs1956458	cg01751040	0.0179119	5.05254e-05
rs4902361	cg00302379	0.0159161	0.000391521
rs13170957	cg17430199	-0.033125	0.00138954
rs332186	cg06097048	0.048729	0.000101061
rs332187	cg06097048	0.048729	0.000101061
rs1568391	cg22873414	-0.0289005	9.67484e-05
rs10777769	cg27246571	-0.0328754	4.83701e-05
rs2863700	cg03700417	-0.050617	7.92808e-06
rs2345568	cg23216724	-0.0445976	3.95845e-06
rs2757041	cg23216724	-0.0436784	2.79063e-06
rs34853270	cg02893324	-0.040553	1.07614e-05
rs11906812	cg20918393	0.016599	2.77997e-05
rs67606949	cg06900004	-0.0537225	4.00888e-06
rs6580191	cg12695286	0.0263492	1.06044e-05
rs868814	cg00302379	0.0153258	0.000472942
rs4412577	cg23747839	-0.0317639	9.29009e-05
rs4265414	cg23747839	-0.0317639	9.29009e-05
rs4575068	cg23747839	-0.0320894	8.57307e-05
rs901900	cg03700417	-0.0528545	2.86302e-06
rs7144259	cg00302379	0.0175367	0.000391558
rs7222776	cg10241823	0.0337624	1.25395e-05
rs12694890	cg09494379	-0.0258249	1.41587e-05
rs34400805	cg08928926	0.0387666	7.08042e-06
rs58363746	cg23470227	-0.0398073	1.60233e-07
rs6808958	cg15361247	-0.0400906	1.11353e-06
rs17015274	cg09152259	0.0283829	0.00287826
rs165284	cg14164816	0.0326608	0.00128511
rs779433451;rs201368033;rs12452575;rs71160283	cg13074526	-0.0351753	2.70218e-07
rs34329423	cg08928926	0.0362616	1.52185e-05
rs34030940	cg08928926	0.0362616	1.52185e-05
rs35610147	cg08928926	0.0362616	1.52185e-05
rs35033009	cg08928926	0.0362616	1.52185e-05
rs10914371	cg08928926	0.0362616	1.52185e-05
rs10798847	cg08928926	0.0362616	1.52185e-05
rs2377784	cg08928926	0.0362616	1.52185e-05
rs6698579	cg08928926	0.0362616	1.52185e-05
rs12117387	cg08928926	0.0362616	1.52185e-05
rs6665949	cg08928926	0.0362616	1.52185e-05
rs905928	cg08928926	0.0362616	1.52185e-05
rs905926	cg08928926	0.0362616	1.52185e-05
rs7534392	cg08928926	0.0362616	1.52185e-05
rs7534465	cg08928926	0.0362616	1.52185e-05
rs6425745	cg08928926	0.0362616	1.52185e-05
rs6425746	cg08928926	0.0362616	1.52185e-05
rs1505572	cg08928926	0.0362616	1.52185e-05
rs10892916	cg02763813	-0.0496385	9.45954e-06
rs150112	cg20406979	0.0336798	1.80933e-05
rs7551345	cg08928926	0.036568	1.52866e-05
rs3783720	cg00302379	0.0166056	0.000405421
rs1982661	cg17430199	0.0334386	3.39204e-05
rs12122184	cg08928926	0.0362616	1.52185e-05
rs762810	cg00302379	0.018946	6.41533e-05
rs1995585	cg08928926	0.0362616	1.52185e-05
rs2377785	cg08928926	0.0362616	1.52185e-05
rs7515829	cg08928926	0.0362616	1.52185e-05
rs3788357	cg06040542	-0.0278659	0.000339578
rs6519421	cg06040542	-0.0257212	0.000517217
rs7105537	cg12368752	0.025308	1.51318e-05
rs7110261	cg12368752	0.025308	1.51318e-05
rs4867439	cg06726471	0.0412484	4.6062e-06
rs10058172	cg09849319	0.034946	1.24178e-06
rs11644411	cg27208925	-0.030073	0.000248219
rs4458403	cg15361247	-0.0401639	1.07319e-06
rs4682791	cg15361247	-0.0401639	1.07319e-06
rs11575078	cg20406979	0.0308735	0.00011392
rs4704405	cg17430199	-0.0318217	0.00190015
rs12122236	cg08928926	0.0361361	1.60614e-05
rs10753249	cg08928926	0.0361361	1.60614e-05
rs7517314	cg08928926	0.0361361	1.60614e-05
rs61780780	cg08928926	0.0361361	1.60614e-05
rs7030384	cg08562586	-0.0507724	2.76454e-07
rs2757039	cg23216724	-0.0433502	2.94696e-06
rs10982592	cg08562586	-0.0507724	2.76454e-07
rs970114	cg17430199	-0.0326831	0.00159074
rs6453297	cg17430199	-0.0326831	0.00159074
rs34687290	cg08928926	0.0361361	1.60614e-05
rs9892659	cg15815084	0.0368692	0.000265102
rs114737875	cg08928926	0.0362304	2.38221e-05
rs151353	cg15402265	-0.0273524	4.64829e-06
rs7225024	cg27023597	-0.039221	1.74199e-05
rs3795432	cg08928926	0.036568	1.52866e-05
rs332152	cg06097048	0.0470702	0.000184597
rs6035463	cg20918393	0.0163042	3.57928e-05
rs1522748	cg17927313	-0.0164698	2.0677e-06
rs9391973	cg03703031	-0.0467115	1.98458e-06
rs9392436	cg03703031	-0.0467115	1.98458e-06
rs2247315	cg23216724	-0.0426623	3.38419e-06
rs4902364	cg00302379	0.0170407	0.000119973
rs8015330	cg00302379	0.0170407	0.000119973
rs11627859	cg00302379	0.0170407	0.000119973
rs1319577	cg01751040	0.0183651	0.000877851
rs10982497	cg08562586	-0.040395	1.80108e-06
rs12058198	cg08928926	0.0362616	1.52185e-05
rs165006	cg14164816	0.0294406	0.00163325
rs9895763	cg23470227	-0.0341582	6.69453e-05
rs332146	cg06097048	0.0473359	0.000188496
rs10733091	cg23747839	-0.0317009	9.00133e-05
rs7255060	cg05840754	-0.0412436	0.00181016
rs10145378	cg01751040	0.0166577	0.000217923
rs9457274	cg20406979	0.0320256	6.01463e-05
rs12279100	cg02763813	-0.0482523	1.33013e-05
rs1986554	cg02763813	-0.0482523	1.33013e-05
rs4658360	cg23747839	-0.0308825	0.000147645
rs6911766	cg20406979	-0.0351631	3.44152e-05
rs865576	cg17927313	-0.0167847	6.75059e-07
rs12145953	cg08928926	0.0361361	1.60614e-05
rs4949391	cg08928926	0.0361361	1.60614e-05
rs12562824	cg08928926	0.0361361	1.60614e-05
rs1531615	cg17430199	0.0329717	3.49546e-05
rs9459835	cg23216724	0.0384771	2.94204e-05
rs1990611	cg27246571	-0.02867	0.000220268
rs424244	cg03703031	0.0371984	3.40748e-05
rs391525	cg22873414	0.0315857	2.46984e-05
rs12586312	cg04348689	0.0221158	0.000756905
rs332158	cg06097048	0.0467979	0.000186392
rs2772435	cg06097048	0.0467979	0.000186392
rs2807759	cg06097048	0.0467979	0.000186392
rs332121	cg06097048	0.0467979	0.000186392
rs332124	cg06097048	0.0467979	0.000186392
rs332126	cg06097048	0.0467979	0.000186392
rs332128	cg06097048	0.0467979	0.000186392
rs231202	cg06097048	0.0467979	0.000186392
rs332131	cg06097048	0.0467979	0.000186392
rs332134	cg06097048	0.0467979	0.000186392
rs332137	cg06097048	0.0467979	0.000186392
rs332139	cg06097048	0.0467979	0.000186392
rs332140	cg06097048	0.0467979	0.000186392
rs332142	cg06097048	0.0467979	0.000186392
rs332143	cg06097048	0.0467979	0.000186392
rs332154	cg06097048	0.0467979	0.000186392
rs332156	cg06097048	0.0467979	0.000186392
rs332161	cg06097048	0.0467979	0.000186392
rs332162	cg06097048	0.0467979	0.000186392
rs332168	cg06097048	0.0467979	0.000186392
rs332172	cg06097048	0.0467979	0.000186392
rs332177	cg06097048	0.0467979	0.000186392
rs332178	cg06097048	0.0467979	0.000186392
rs332183	cg06097048	0.0467979	0.000186392
rs1357370	cg17927313	-0.0169957	4.83625e-07
rs56024005	cg03700417	-0.0504212	6.49422e-05
rs17570409	cg17430199	0.0337262	2.73641e-05
rs2145175	cg01751040	0.0182016	0.000307565
rs4776250	cg17927313	-0.0167701	7.83919e-07
rs832884	cg17927313	-0.0167511	7.32182e-07
rs896338	cg03700417	-0.0500335	8.36364e-06
rs449811	cg03703031	0.0370604	4.79274e-05
rs8009396	cg00302379	0.0169142	0.000206646
rs10061629	cg17430199	-0.0335779	0.00115679
rs56016541	cg23470227	-0.0335944	0.000109087
rs11788513	cg08562586	-0.0390525	5.98951e-06
rs6453301	cg17430199	-0.0351486	0.000339969
rs332151	cg06097048	0.0461626	0.000227765
rs6456156	cg20406979	0.0318874	7.82743e-05
rs7942122	cg02763813	-0.0491432	2.39567e-05
rs898834	cg02280892	0.0604314	1.39574e-07
rs6136867	cg20918393	0.0155468	0.000145398
rs3765703	cg11832534	0.0113028	0.000262302
rs7173413	cg21727145	-0.0383634	6.57725e-06
rs11792749	cg08562586	-0.0394657	2.22641e-06
rs11915185	cg09610644	0.0348341	6.32256e-05
rs4858556	cg06900004	-0.0473807	1.38571e-05
rs1479598	cg17430199	-0.0319118	0.00183279
rs1322077	cg23216724	0.0369396	6.21106e-05
rs2072512	cg27246571	-0.0287837	0.000187657
rs2757053	cg23216724	-0.0404951	1.00135e-05
rs1130033	cg23216724	-0.0404951	1.00135e-05
rs73916894	cg23577001	0.034548	9.3822e-05
rs2540492	cg27246571	-0.0283193	0.000266452
rs2540491	cg27246571	-0.0283193	0.000266452
rs111852804	cg23470227	-0.0339675	9.42565e-05
rs7134060	cg16609459	-0.0328404	4.43879e-05
rs8009714	cg00302379	0.0169142	0.000206646
rs884683	cg00302379	0.0169142	0.000206646
rs12147959	cg00302379	0.0169142	0.000206646
rs12880781	cg00302379	0.0169142	0.000206646
rs35769504	cg00302379	0.0169142	0.000206646
rs11158572	cg00302379	0.0169142	0.000206646
rs12888794	cg00302379	0.0169142	0.000206646
rs1978331	cg27246571	-0.0287536	0.000179847
rs11625045	cg00302379	0.0168698	0.000203105
rs942627	cg00302379	0.0168698	0.000203105
rs55658675	cg00302379	0.0168698	0.000203105
rs8181939	cg00302379	0.0168698	0.000203105
rs7161394	cg00302379	0.0168698	0.000203105
rs1034087	cg06097048	0.0439605	0.000322297
rs1272396	cg06097048	0.0439605	0.000322297
rs12285598	cg19566482	-0.0527847	1.11729e-06
rs1044780	cg04348689	0.024452	0.000482045
rs10982504	cg08562586	-0.040395	1.80108e-06
rs1953228	cg00302379	0.016879	0.000213711
rs1825934	cg03700417	-0.0508905	4.21114e-06
rs7761159	cg20406979	0.0313783	0.000102367
rs9457249	cg23216724	0.036712	5.8489e-05
[truncated: 5,821 more rows]

## Sheet: CD-CpGs in CTRLs FDR
The blood cis-mQTLs detected for 977 CD associated CpGs from Somineni et al. 2019 in CTRL (n=74) alone at FDR level
SNP	gene	Estimates	Pvalue
rs571126	cg19070398	-0.0813805	5.70903e-15
rs805883	cg19070398	-0.0809266	4.14926e-15
rs10769150	cg03700417	-0.0901473	9.20488e-09
rs570393;rs796963361;rs59562890	cg19070398	0.07636	6.07748e-12
rs1873057	cg03700417	-0.0812269	5.0647e-07
rs608938	cg19070398	0.0765242	1.56249e-11
rs6125883	cg00568296	-0.0808466	1.95043e-08
rs34219567	cg10065189	-0.0499404	9.9453e-08
rs56245572	cg10065189	-0.0499404	9.9453e-08
rs1109279	cg10065189	-0.0499404	9.9453e-08
rs2769355	cg20406979	0.0566774	2.15878e-06
rs2757054	cg20406979	0.0566774	2.15878e-06
rs443570	cg20406979	0.0577958	1.66753e-06
rs366938	cg20406979	0.0566549	2.58993e-06
rs1811121	cg20406979	0.0566549	2.58993e-06
rs394522	cg20406979	0.0565308	2.6084e-06
rs10946199	cg20406979	0.0566774	2.15878e-06
rs1819333	cg20406979	0.0566774	2.15878e-06
rs2013815	cg20406979	0.0566774	2.15878e-06
rs2769349	cg20406979	0.0566774	2.15878e-06
rs1187530	cg20406979	0.0566774	2.15878e-06
rs2757050	cg20406979	0.0566774	2.15878e-06
rs1590257	cg20406979	0.0566774	2.15878e-06
rs2769351	cg20406979	0.0566774	2.15878e-06
rs6939196	cg20406979	0.0566774	2.15878e-06
rs2769354	cg20406979	0.0566774	2.15878e-06
rs2757052	cg20406979	0.0566774	2.15878e-06
rs1211447	cg20406979	0.0566774	2.15878e-06
rs1187532	cg20406979	0.0566774	2.15878e-06
rs434093	cg20406979	0.0566774	2.15878e-06
rs448060	cg20406979	0.0566774	2.15878e-06
rs365189	cg20406979	0.0566774	2.15878e-06
rs376551	cg20406979	0.0566774	2.15878e-06
rs386548	cg20406979	0.0566774	2.15878e-06
rs402749	cg20406979	0.0566774	2.15878e-06
rs385863	cg20406979	0.0566774	2.15878e-06
rs397713	cg20406979	0.0566774	2.15878e-06
rs453184	cg20406979	0.0566774	2.15878e-06
rs436707	cg20406979	0.0566774	2.15878e-06
rs442298	cg20406979	0.0566774	2.15878e-06
rs377753	cg20406979	0.0566774	2.15878e-06
rs430477	cg20406979	0.0566774	2.15878e-06
rs376574	cg20406979	0.0566774	2.15878e-06
rs439237	cg20406979	0.0566774	2.15878e-06
rs9457247	cg20406979	0.0566774	2.15878e-06
rs9459827	cg20406979	0.0566774	2.15878e-06
rs1794699	cg20406979	0.0566774	2.15878e-06
rs1743439	cg20406979	0.0566774	2.15878e-06
rs13192426	cg20406979	0.0566774	2.15878e-06
rs13192687	cg20406979	0.0566774	2.15878e-06
rs9717548	cg20406979	0.0566774	2.15878e-06
rs5020533	cg20406979	0.0566774	2.15878e-06
rs1620933	cg20406979	0.0566774	2.15878e-06
rs415987	cg20406979	0.0566774	2.15878e-06
rs1794697	cg20406979	0.0566774	2.15878e-06
rs34560498;rs386708543	cg20406979	0.0566774	2.15878e-06
rs414437	cg20406979	0.0566774	2.15878e-06
rs421214	cg20406979	0.0566774	2.15878e-06
rs422094	cg20406979	0.0566774	2.15878e-06
rs393558	cg20406979	0.0566774	2.15878e-06
rs436625	cg20406979	0.0566774	2.15878e-06
rs408040	cg20406979	0.0566774	2.15878e-06
rs408918	cg20406979	0.0566774	2.15878e-06
rs413232	cg20406979	0.0566774	2.15878e-06
rs86755	cg20406979	0.0566774	2.15878e-06
rs382009	cg20406979	0.0566774	2.15878e-06
rs428805	cg20406979	0.0566774	2.15878e-06
rs2345571	cg20406979	0.0566774	2.15878e-06
rs385460	cg20406979	0.0566774	2.15878e-06
rs385113	cg20406979	0.0566774	2.15878e-06
rs932644	cg20406979	0.0566774	2.15878e-06
rs10946198	cg20406979	0.0566774	2.15878e-06
rs1743440	cg20406979	0.0566774	2.15878e-06
rs1743441	cg20406979	0.0566774	2.15878e-06
rs1794694	cg20406979	0.0566774	2.15878e-06
rs430293	cg20406979	0.0566774	2.15878e-06
rs430097	cg20406979	0.0566774	2.15878e-06
rs409356	cg20406979	0.0566774	2.15878e-06
rs447042	cg20406979	0.0566774	2.15878e-06
rs402191	cg20406979	0.0566774	2.15878e-06
rs1794693	cg20406979	0.0566774	2.15878e-06
rs401260	cg20406979	0.0566774	2.15878e-06
rs422694	cg20406979	0.0566774	2.15878e-06
rs422780	cg20406979	0.0566774	2.15878e-06
rs400176	cg20406979	0.0566774	2.15878e-06
rs422562	cg20406979	0.0566774	2.15878e-06
rs416131	cg20406979	0.0566774	2.15878e-06
rs415890	cg20406979	0.0566774	2.15878e-06
rs415842	cg20406979	0.0566774	2.15878e-06
rs389956	cg20406979	0.0566774	2.15878e-06
rs389946	cg20406979	0.0566774	2.15878e-06
rs401261	cg20406979	0.05642	1.93683e-06
rs2793381	cg02280892	0.0913509	7.97411e-08
rs2015864	cg20406979	0.0560898	3.21302e-06
rs1811123	cg20406979	0.0567957	2.78733e-06
rs364283	cg20406979	0.0567378	5.91584e-06
rs429083	cg20406979	0.0567378	5.91584e-06
rs4710147	cg20406979	0.0566774	2.15878e-06
rs2757046	cg20406979	0.0566774	2.15878e-06
rs2757047	cg20406979	0.0566774	2.15878e-06
rs393727	cg20406979	0.0566774	2.15878e-06
rs405553	cg20406979	0.0566774	2.15878e-06
rs2345573	cg20406979	0.0566774	2.15878e-06
rs407515	cg20406979	0.0564585	9.02697e-06
rs406095	cg20406979	0.0564585	9.02697e-06
rs4710160	cg20406979	0.0564585	9.02697e-06
rs4710161	cg20406979	0.0564585	9.02697e-06
rs388406	cg20406979	0.0564585	9.02697e-06
rs430145	cg20406979	0.0564585	9.02697e-06
rs425039	cg20406979	0.0564585	9.02697e-06
rs376097	cg20406979	0.0564585	9.02697e-06
rs424185	cg20406979	0.0564585	9.02697e-06
rs400837	cg20406979	0.0564585	9.02697e-06
rs4997107	cg20406979	0.0566774	2.15878e-06
rs2249731	cg02280892	0.0958678	5.41246e-08
rs439553	cg20406979	-0.0582621	6.75128e-07
rs2149083	cg20406979	0.0566774	2.15878e-06
rs2149084	cg20406979	0.0566774	2.15878e-06
rs2769346	cg20406979	0.0566774	2.15878e-06
rs2149085	cg20406979	0.0566774	2.15878e-06
rs2769347	cg20406979	0.0566774	2.15878e-06
rs2769348	cg20406979	0.0566774	2.15878e-06
rs2149090	cg20406979	0.0566774	2.15878e-06
rs2149091	cg20406979	0.0566774	2.15878e-06
rs2149092	cg20406979	0.0566774	2.15878e-06
rs444210	cg20406979	-0.0575958	1.52227e-06
rs400063	cg20406979	-0.0582621	6.75128e-07
rs1794700	cg20406979	-0.0582621	6.75128e-07
rs1317170	cg02280892	0.0958678	5.41246e-08
rs2570367	cg02280892	0.0958678	5.41246e-08
rs2757044	cg20406979	0.0575282	2.23943e-06
rs433191	cg20406979	0.0547204	2.2762e-05
rs408087	cg20406979	-0.0547073	3.43462e-06
rs387733	cg20406979	0.0564585	9.02697e-06
rs9900933	cg23470227	-0.0586094	1.66605e-09
rs9903858	cg23470227	-0.0561762	4.42106e-09
rs1047743	cg23470227	-0.0561762	4.42106e-09
rs8069105	cg23470227	-0.0560691	3.39585e-09
rs377232	cg20406979	-0.0558701	6.70972e-06
rs6091092	cg00568296	-0.0962257	2.33542e-10
rs56785718	cg27569037	0.0565854	1.59061e-06
rs7656235	cg27569037	0.0565854	1.59061e-06
rs1076714	cg00568296	-0.0575701	4.20456e-05
rs4662721	cg09152259	0.0705228	5.90434e-13
rs4662724	cg09152259	0.0693061	5.47502e-13
rs12613413	cg09152259	0.0683786	4.36657e-13
rs1044059	cg20406979	0.0606355	1.98677e-06
rs2276683	cg09152259	0.0682546	1.73751e-12
rs2276682	cg09152259	0.0673997	2.81305e-12
rs10769151	cg03700417	-0.0911572	5.01655e-08
rs4485425	cg23470227	-0.054495	2.06885e-08
rs10928764	cg09152259	0.0705228	5.90434e-13
rs2090573	cg09152259	0.0705228	5.90434e-13
rs6430937	cg09152259	0.0701868	1.2858e-12
rs7225724	cg15815084	0.086015	2.80396e-09
rs6503775	cg15815084	0.086015	2.80396e-09
rs4365350	cg15815084	0.086015	2.80396e-09
rs2757042	cg20406979	0.0606355	1.98677e-06
rs11652539	cg23470227	-0.0485726	7.57626e-07
rs11652261	cg23470227	-0.0485726	7.57626e-07
rs73352129	cg23470227	-0.054495	2.06885e-08
rs67740167	cg23470227	-0.054495	2.06885e-08
rs78057960	cg23470227	-0.054495	2.06885e-08
rs8076052	cg23470227	-0.054495	2.06885e-08
rs2125345;rs558180280	cg23470227	-0.054495	2.06885e-08
rs13429925	cg09152259	0.0680108	1.15487e-12
rs878371	cg23470227	-0.0513111	1.37215e-07
rs11658385	cg23470227	-0.051793	1.63289e-07
rs8071825	cg15815084	0.086015	2.80396e-09
rs9892183	cg15815084	0.086015	2.80396e-09
rs7584659	cg09152259	0.0705143	9.18712e-13
rs59027829	cg09152259	0.0702752	1.70965e-12
rs364451	cg20406979	0.0674856	1.70226e-07
rs398278	cg20406979	0.0605664	2.6079e-06
rs28578956	cg23470227	-0.0488611	3.86034e-07
rs6095747	cg00568296	-0.0925606	4.88636e-10
rs2238645	cg02370334	-0.0419122	5.73695e-05
rs239935	cg20406979	0.0616703	2.55012e-06
rs1322077	cg20406979	0.0521376	2.86519e-06
rs1135688	cg23470227	-0.0481457	1.17091e-06
rs2149093	cg20406979	0.0606355	1.98677e-06
rs444988	cg20406979	0.0606355	1.98677e-06
rs408080	cg20406979	0.0606355	1.98677e-06
rs1794696	cg20406979	0.0606355	1.98677e-06
rs404222	cg20406979	0.0606355	1.98677e-06
rs9457249	cg20406979	0.0521376	2.86519e-06
rs9457251	cg20406979	0.0521376	2.86519e-06
rs4789229	cg23470227	-0.0488611	3.86034e-07
rs9348211	cg20406979	0.0606355	1.98677e-06
rs6920364	cg20406979	0.0606355	1.98677e-06
rs2769352	cg20406979	0.0606355	1.98677e-06
rs1811120	cg20406979	0.0606355	1.98677e-06
rs427824	cg20406979	0.0606355	1.98677e-06
rs9717862	cg20406979	0.0606355	1.98677e-06
rs6091091	cg00568296	-0.0873583	3.75104e-09
rs4300780	cg09152259	0.0712763	3.96132e-12
rs12613252	cg09152259	0.0712763	3.96132e-12
rs12613254	cg09152259	0.0712763	3.96132e-12
rs13414676	cg09152259	0.0712763	3.96132e-12
rs13390029	cg09152259	0.0712763	3.96132e-12
rs13409933	cg09152259	0.0712763	3.96132e-12
rs239934	cg20406979	0.0604106	3.03739e-06
rs55636440	cg23470227	-0.0496767	4.56206e-07
rs28807127	cg09152259	0.0712763	3.96132e-12
rs13017103	cg09152259	0.0712763	3.96132e-12
rs10221244	cg23470227	-0.0481584	6.47128e-07
rs4346838	cg20406979	0.0612114	2.45584e-06
rs2345572	cg20406979	0.0612114	2.45584e-06
rs34006114	cg09152259	0.069208	8.82523e-13
rs3212701	cg02370334	-0.0396976	9.40188e-05
rs11899601	cg09152259	0.0712763	3.96132e-12
rs10167294	cg09152259	0.0712763	3.96132e-12
rs8081539	cg23470227	-0.0488611	3.86034e-07
rs4150434	cg09152259	0.0694858	5.25281e-12
rs12614320	cg09152259	0.0694858	5.25281e-12
rs12600868	cg23470227	-0.0488611	3.86034e-07
rs8047999	cg22873414	0.0515293	6.28768e-07
rs1143407	cg09152259	0.0694858	5.25281e-12
rs35757209	cg23470227	-0.0489402	4.73265e-07
rs4789227	cg23470227	-0.0489402	4.73265e-07
rs78742057	cg20859453	-0.174387	1.03137e-08
rs73645935	cg20859453	-0.174387	1.03137e-08
rs6475024	cg20859453	-0.174387	1.03137e-08
rs7218058	cg23470227	-0.0534511	3.82199e-08
rs3738948	cg09152259	0.0694858	5.25281e-12
rs4150514	cg09152259	0.0694858	5.25281e-12
rs58063879	cg09152259	0.0694858	5.25281e-12
rs13403918	cg09152259	0.0694858	5.25281e-12
rs12617858	cg09152259	0.0694858	5.25281e-12
rs2134794	cg09152259	0.0694858	5.25281e-12
rs6716392	cg09152259	0.0674101	9.60728e-12
rs16977599	cg12421287	0.0550081	6.07326e-07
rs7216615	cg23470227	-0.0513638	1.30838e-07
rs2061387	cg23470227	-0.0513423	1.02952e-07
rs7217432	cg23470227	-0.0513423	1.02952e-07
rs7221792	cg23470227	-0.0487964	7.4396e-07
rs7217536	cg23470227	-0.0534511	3.82199e-08
rs7216512	cg23470227	-0.0534511	3.82199e-08
rs12602430	cg23470227	-0.0534511	3.82199e-08
rs12603812	cg23470227	-0.0534511	3.82199e-08
rs2071556	cg09017117	0.0540515	2.11107e-06
rs2238644	cg02370334	-0.041047	0.000132473
rs8051462	cg22873414	0.0518019	2.65445e-07
rs9459835	cg20406979	0.0537467	7.08211e-07
rs7223416	cg23470227	-0.0534725	4.71637e-08
rs6929466	cg20406979	0.0542249	6.34181e-07
rs9459840	cg20406979	0.0542249	6.34181e-07
rs9459841	cg20406979	0.0542249	6.34181e-07
rs6904946	cg20406979	0.0542249	6.34181e-07
rs6900701	cg20406979	0.0542249	6.34181e-07
rs6923582	cg20406979	0.0542249	6.34181e-07
rs2237276	cg20406979	0.0542249	6.34181e-07
rs13195812	cg20406979	0.0542249	6.34181e-07
rs9295385	cg20406979	0.0542249	6.34181e-07
rs35708549	cg09152259	0.0712053	5.15777e-13
rs13034157	cg09152259	0.0712053	5.15777e-13
rs35171809	cg20406979	0.0529507	3.99233e-07
rs10017705	cg27569037	0.0548575	3.12954e-05
rs4234892	cg27569037	0.0548575	3.12954e-05
rs4690807	cg27569037	0.0548575	3.12954e-05
rs9923	cg09152259	0.0691553	1.95196e-12
rs11731244	cg27569037	0.0548575	3.12954e-05
rs6735779	cg09152259	0.0726916	4.9812e-13
rs8100347	cg02370334	-0.0424521	4.88135e-05
rs67771362	cg09152259	0.0712053	5.15777e-13
rs11684068	cg09152259	0.0692097	6.50795e-13
rs2139142	cg09152259	0.0692097	6.50795e-13
rs34703177	cg09152259	0.0742759	1.96154e-12
rs34441363	cg09152259	0.0742759	1.96154e-12
rs6738811	cg09152259	0.0742759	1.96154e-12
rs6752139	cg09152259	0.0742759	1.96154e-12
rs147898570	cg09152259	0.0742759	1.96154e-12
rs7970524	cg27246571	-0.0585218	2.24365e-06
rs9894244	cg23470227	-0.0535531	5.96546e-08
rs9894291	cg23470227	-0.0535531	5.96546e-08
rs12526548	cg20406979	0.0529507	3.99233e-07
rs9459839	cg20406979	0.0529507	3.99233e-07
rs1894603	cg20406979	0.0529507	3.99233e-07
rs9459845	cg20406979	0.0529507	3.99233e-07
rs9457257	cg20406979	0.0529507	3.99233e-07
rs9459846	cg20406979	0.0529507	3.99233e-07
rs6456146	cg20406979	0.0529507	3.99233e-07
rs9295384	cg20406979	0.0529507	3.99233e-07
rs12619391	cg09152259	0.0707371	3.33263e-12
rs2203894	cg15815084	0.0847266	5.7687e-09
rs11655389	cg23470227	-0.0460043	2.30631e-06
rs4150506	cg09152259	0.0694482	7.41858e-12
rs58875777	cg27569037	0.0498973	6.47395e-06
rs239933	cg20406979	0.0547779	3.07528e-07
rs3744006	cg23470227	-0.0535531	5.96546e-08
rs9459842	cg20406979	0.0529507	3.99233e-07
rs7749278	cg20406979	0.0529507	3.99233e-07
rs2282861	cg20406979	0.0529507	3.99233e-07
rs2282860	cg20406979	0.0529507	3.99233e-07
rs2181059	cg20406979	0.0529507	3.99233e-07
rs2237277	cg20406979	0.0529507	3.99233e-07
rs9457258	cg20406979	0.0529507	3.99233e-07
rs10946205	cg20406979	0.0529507	3.99233e-07
rs28836897	cg27569037	0.0548575	3.12954e-05
rs28875870	cg27569037	0.0548575	3.12954e-05
rs4588419	cg27569037	0.0548575	3.12954e-05
rs4690808	cg27569037	0.0548575	3.12954e-05
rs6456143	cg20406979	0.0529507	3.99233e-07
rs2237273	cg20406979	0.0529507	3.99233e-07
rs34601617	cg09152259	0.0710603	1.20962e-12
rs9897048	cg23470227	-0.0513638	1.30838e-07
rs935471	cg11878712	0.0464467	1.13049e-05
rs35103294	cg23470227	-0.0457816	7.13672e-07
rs8074963	cg23470227	-0.0513638	1.30838e-07
rs903202	cg22873414	0.0477025	2.78388e-06
rs4789155	cg02433148	0.0503037	5.60756e-09
rs1979215	cg23470227	-0.0435481	1.19473e-05
rs6503769	cg15815084	0.0815151	1.3515e-08
rs12600529	cg15815084	0.0815151	1.3515e-08
rs62353271	cg27569037	0.0505054	0.000207909
rs8067076	cg23470227	-0.051195	1.48174e-07
rs2237275	cg20406979	0.052603	1.01729e-06
rs2237274	cg20406979	0.052603	1.01729e-06
rs6747862	cg09152259	0.0741529	3.0508e-12
rs4150492	cg09152259	0.0712024	4.34391e-12
rs9906591	cg12582317	0.0592383	6.34953e-06
rs886925	cg12582317	0.0592383	6.34953e-06
rs1970872	cg15815084	0.0801898	1.74371e-08
rs3867602	cg15815084	0.0801898	1.74371e-08
rs2301436	cg20406979	0.052468	7.55492e-07
rs6503768	cg15815084	0.0818256	1.63464e-08
rs3791268	cg11878712	0.04732	9.34225e-06
rs10484531	cg20406979	0.0521376	2.86519e-06
rs386793608;rs1519976	cg22873414	0.0488658	6.91762e-07
rs768410	cg22873414	0.0488658	6.91762e-07
rs3791264	cg11878712	0.04732	9.34225e-06
rs11695371	cg11878712	0.04732	9.34225e-06
rs11676854	cg11878712	0.04732	9.34225e-06
rs7576554	cg11878712	0.04732	9.34225e-06
rs7593036	cg11878712	0.04732	9.34225e-06
rs6757621	cg11878712	0.04732	9.34225e-06
rs57223057	cg11878712	0.04732	9.34225e-06
rs7596803	cg11878712	0.04732	9.34225e-06
rs10946203	cg20406979	0.0566323	6.67644e-07
rs2540499	cg27246571	-0.0585322	4.12954e-06
rs2540498	cg27246571	-0.0585322	4.12954e-06
rs376571402	cg20406979	0.046232	1.54545e-05
rs55913048	cg02893324	-0.0653588	1.5868e-09
rs9459836	cg20406979	0.0550963	1.04159e-06
rs386708545;rs200447952;rs79452434	cg20406979	0.0490645	9.99058e-06
rs199612119;rs147968	cg22873414	0.0464536	2.57412e-06
rs12212247	cg20406979	0.0576343	5.79807e-07
rs6428525	cg23747839	-0.070197	3.15193e-08
rs12477214	cg09152259	0.0634137	2.54578e-11
rs9457254	cg20406979	0.0555425	7.72504e-07
rs2237272	cg20406979	0.0555425	7.72504e-07
rs10455982	cg20406979	0.0555425	7.72504e-07
rs1850689	cg09152259	0.0633997	4.04979e-11
rs71373396	cg15815084	0.0815151	1.3515e-08
rs9459838	cg20406979	0.0555425	7.72504e-07
rs13008440	cg09152259	0.0720264	3.2972e-12
rs56151459	cg02893324	-0.0653588	1.5868e-09
rs13032010	cg02893324	-0.0653588	1.5868e-09
rs9457256	cg20406979	0.0545708	1.24636e-06
rs1990231	cg12582317	0.0577938	5.14596e-06
rs9910446	cg12582317	0.0577938	5.14596e-06
rs12451748	cg12582317	0.0577938	5.14596e-06
rs12451753	cg12582317	0.0577938	5.14596e-06
rs12449409	cg12582317	0.0577938	5.14596e-06
rs7220397	cg12582317	0.0577938	5.14596e-06
rs8081251	cg12582317	0.0577938	5.14596e-06
rs1060404	cg20406979	0.0545708	1.24636e-06
rs4710171	cg20406979	0.0545708	1.24636e-06
rs9457252	cg20406979	0.0545708	1.24636e-06
rs3752520	cg20406979	0.0545708	1.24636e-06
rs9459849	cg20406979	0.0545708	1.24636e-06
rs9457259	cg20406979	0.0545708	1.24636e-06
rs10946204	cg20406979	0.0545708	1.24636e-06
rs2332966	cg12582317	0.0550177	2.03217e-05
rs55894868	cg02893324	-0.0656964	1.62936e-09
rs12990553	cg02893324	-0.0630794	9.91821e-09
rs3769161	cg02893324	-0.0630794	9.91821e-09
rs56084435	cg02893324	-0.0663089	1.00687e-09
rs375004057	cg02893324	-0.0663089	1.00687e-09
rs377400560	cg02893324	-0.0663089	1.00687e-09
rs2742417	cg15361247	0.0291658	0.000910546
rs4359587	cg09152259	0.0608863	1.39227e-09
rs2251954	cg15361247	0.0291658	0.000910546
rs2742421	cg15361247	0.0291658	0.000910546
rs36053895;rs386355408	cg02893324	-0.0633256	5.08069e-09
rs2076857	cg02893324	-0.0620108	1.08732e-08
rs9877499	cg15361247	0.0315257	0.000433829
rs2673035;rs142054397	cg15361247	0.0291658	0.000910546
rs2742420	cg15361247	0.0291658	0.000910546
rs2673051	cg15361247	0.0291658	0.000910546
rs2742422	cg15361247	0.0291658	0.000910546
rs2742423	cg15361247	0.0291658	0.000910546
rs17328701	cg15361247	0.0291658	0.000910546
rs1969624	cg15361247	0.0291658	0.000910546
rs1969625	cg15361247	0.0291658	0.000910546
rs1609553	cg15361247	0.0291658	0.000910546
rs1609554	cg15361247	0.0291658	0.000910546
rs2673058	cg15361247	0.0291658	0.000910546
rs2673057	cg15361247	0.0291658	0.000910546
rs2742426	cg15361247	0.0291658	0.000910546
rs2742427	cg15361247	0.0291658	0.000910546
rs2742429	cg15361247	0.0291658	0.000910546
rs2742430	cg15361247	0.0291658	0.000910546
rs2742431	cg15361247	0.0291658	0.000910546
rs2742432	cg15361247	0.0291658	0.000910546
rs2673056	cg15361247	0.0291658	0.000910546
rs9825559	cg15361247	0.0291658	0.000910546
rs9809868	cg15361247	0.0291658	0.000910546
rs9829631	cg15361247	0.0291658	0.000910546
rs1534875	cg15361247	0.0291658	0.000910546
rs1534876	cg15361247	0.0291658	0.000910546
rs2673047	cg15361247	0.0291658	0.000910546
rs2742438	cg15361247	0.0291658	0.000910546
rs2742439	cg15361247	0.0291658	0.000910546
rs938363;rs34519783	cg15361247	0.0291658	0.000910546
rs938362	cg15361247	0.0291658	0.000910546
rs1969626	cg15361247	0.0291658	0.000910546
rs2373047	cg15361247	0.0291658	0.000910546
rs2742441	cg15361247	0.0291658	0.000910546
rs2742442	cg15361247	0.0291658	0.000910546
rs2673038	cg15361247	0.0291658	0.000910546
rs2673037	cg15361247	0.0291658	0.000910546
rs2245705	cg15361247	0.0291658	0.000910546
rs1883096	cg15361247	0.0291658	0.000910546
rs2673036	cg15361247	0.0291658	0.000910546
rs2742445	cg15361247	0.0291658	0.000910546
rs1877934	cg15361247	0.0291658	0.000910546
rs1877933	cg15361247	0.0291658	0.000910546
rs1877932	cg15361247	0.0291658	0.000910546
rs2742369	cg15361247	0.0291658	0.000910546
rs2248991	cg15361247	0.0291658	0.000910546
rs2673034	cg15361247	0.0291658	0.000910546
rs2742385	cg15361247	0.0291658	0.000910546
rs2742389	cg15361247	0.0291658	0.000910546
rs2742390	cg15361247	0.0291658	0.000910546
rs2742393	cg15361247	0.0291658	0.000910546
rs2742373	cg15361247	0.0291658	0.000910546
rs1109278	cg10065189	-0.0142099	0.156448
rs2673025	cg15361247	0.0291658	0.000910546
rs2742452	cg15361247	0.0291658	0.000910546
rs2673065	cg15361247	0.0294732	0.000851231
rs2742462	cg15361247	0.0294732	0.000851231
rs2742418	cg15361247	0.0291658	0.000910546
rs2742419	cg15361247	0.0291658	0.000910546
rs7134860	cg27246571	-0.0616933	9.99378e-07
rs7134975	cg27246571	-0.0616933	9.99378e-07
rs7306086	cg27246571	-0.0616933	9.99378e-07
rs61937880	cg27246571	-0.0616933	9.99378e-07
rs61937881	cg27246571	-0.0616933	9.99378e-07
rs10930579	cg02893324	-0.0654278	2.08751e-09
rs2742368	cg15361247	0.030184	0.000628184
rs17677343	cg27246571	-0.0616933	9.99378e-07
rs9905938	cg12582317	0.0577938	5.14596e-06
rs8064970	cg12582317	0.0577938	5.14596e-06
rs2742386	cg15361247	0.0291658	0.000910546
rs6800556	cg15361247	0.0291917	0.000838229
rs2660892	cg27246571	-0.0617948	1.88873e-06
rs6426551	cg02280892	0.0512237	0.0027302
rs12949028	cg12582317	0.0597692	2.85677e-06
rs12950062	cg12582317	0.0597692	2.85677e-06
rs7517174	cg02280892	0.0512237	0.0027302
rs10023382	cg27569037	0.0472196	3.72053e-05
rs2540488	cg27246571	-0.0617948	1.88873e-06
rs2673033	cg15361247	0.0279854	0.00140783
rs4793566	cg12582317	0.0516617	1.90275e-05
rs7211686	cg12582317	0.0516617	1.90275e-05
rs2660891	cg27246571	-0.0593521	6.95486e-06
rs2673052	cg15361247	0.0285785	0.00142699
rs886926	cg12582317	0.0516617	1.90275e-05
rs2247304	cg27246571	-0.0617948	1.88873e-06
rs6668851	cg02280892	0.0412317	0.0106235
rs71343622	cg09152259	0.0722468	5.15665e-11
rs2660838	cg27246571	-0.0617948	1.88873e-06
rs6456150	cg20406979	0.0488142	3.58042e-06
rs7212186	cg12582317	0.0516617	1.90275e-05
rs6702917	cg02280892	0.0512237	0.0027302
rs2540493	cg27246571	-0.0617948	1.88873e-06
rs6932740	cg20406979	0.0488142	3.58042e-06
rs6934043	cg20406979	0.0488142	3.58042e-06
rs1358882	cg20406979	0.0488142	3.58042e-06
rs1358883	cg20406979	0.0488142	3.58042e-06
rs9457261	cg20406979	0.0488142	3.58042e-06
rs1407315	cg20406979	0.0488142	3.58042e-06
rs12527827	cg20406979	0.0488142	3.58042e-06
rs12529959	cg20406979	0.0488142	3.58042e-06
rs6909475	cg20406979	0.0488142	3.58042e-06
rs6909502	cg20406979	0.0488142	3.58042e-06
rs12523712	cg20406979	0.0488142	3.58042e-06
rs911632	cg20406979	0.0488142	3.58042e-06
rs1810644	cg20406979	0.0488142	3.58042e-06
rs1810645	cg20406979	0.0488142	3.58042e-06
rs2017338	cg20406979	0.0488142	3.58042e-06
rs6456151	cg20406979	0.0488142	3.58042e-06
rs6456153	cg20406979	0.0488142	3.58042e-06
rs6456154	cg20406979	0.0488142	3.58042e-06
rs12203510	cg20406979	0.0488142	3.58042e-06
rs13195158	cg20406979	0.0488142	3.58042e-06
rs2187859	cg20406979	0.0488142	3.58042e-06
rs9457266	cg20406979	0.0488142	3.58042e-06
rs7750209	cg20406979	0.0488142	3.58042e-06
rs7746628	cg20406979	0.0488142	3.58042e-06
rs4598049	cg20406979	0.0488142	3.58042e-06
rs2345753	cg20406979	0.0488142	3.58042e-06
rs2345754	cg20406979	0.0488142	3.58042e-06
rs7761977	cg20406979	0.0488142	3.58042e-06
rs7742305	cg20406979	0.0488142	3.58042e-06
rs7762156	cg20406979	0.0488142	3.58042e-06
rs2001115	cg20406979	0.0488142	3.58042e-06
rs9459862	cg20406979	0.0488142	3.58042e-06
rs6909180	cg20406979	0.0488142	3.58042e-06
rs12213683	cg20406979	0.0488142	3.58042e-06
rs12529876	cg20406979	0.0488142	3.58042e-06
rs12528323	cg20406979	0.0488142	3.58042e-06
rs12528689	cg20406979	0.0488142	3.58042e-06
rs13208636	cg20406979	0.0488142	3.58042e-06
rs7748224	cg20406979	0.0488142	3.58042e-06
rs6456149	cg20406979	0.0488142	3.58042e-06
rs2181058	cg20406979	0.0488142	3.58042e-06
rs12529238	cg20406979	0.0488142	3.58042e-06
rs2540497	cg27246571	-0.0617948	1.88873e-06
rs2660900	cg27246571	-0.0617948	1.88873e-06
rs4793912	cg12582317	0.0450776	0.00045182
rs6936261	cg20406979	0.0488142	3.58042e-06
rs13210649	cg20406979	0.0488142	3.58042e-06
rs12213801	cg20406979	0.0488142	3.58042e-06
rs9457265	cg20406979	0.0488142	3.58042e-06
rs2251021	cg15361247	-0.0361182	5.06003e-05
rs9459853	cg20406979	0.0488142	3.58042e-06
rs13008554	cg02893324	-0.061686	2.06557e-08
rs7297245	cg27246571	-0.0719237	3.84304e-07
rs17761169	cg02893324	-0.0596905	3.19766e-08
rs2028382	cg02893324	-0.0595742	3.3047e-08
rs3769167	cg02893324	-0.0625102	1.11111e-08
rs2673049	cg15361247	-0.0318573	0.000501628
rs2742392	cg15361247	-0.0318573	0.000501628
rs2742447	cg15361247	-0.0318573	0.000501628
rs12633747	cg15361247	-0.0318573	0.000501628
rs7966537	cg27246571	-0.0697932	1.21916e-06
rs17676451	cg27246571	-0.0697932	1.21916e-06
rs12525345	cg20406979	0.0478638	8.6441e-06
rs10018252	cg27569037	0.0480875	0.00022664
rs10745746	cg27246571	-0.0709226	1.40579e-06
rs4762659	cg27246571	-0.0709226	1.40579e-06
rs2289399	cg02893324	-0.0612	1.87628e-08
rs2673053	cg15361247	-0.0340875	0.000363611
rs2742424	cg15361247	-0.0340875	0.000363611
rs2742433	cg15361247	-0.0340875	0.000363611
rs3754741	cg02893324	-0.0610586	1.7414e-08
rs2069918	cg09152259	0.0676608	3.94495e-10
rs2157388	cg20406979	0.0560258	2.55783e-07
rs9262148	cg16586538	0.0638089	3.38177e-08
rs6512230	cg02370334	-0.0237285	0.0209702
rs17733203	cg27246571	-0.0678931	3.6944e-06
rs73216216	cg27246571	-0.0678931	3.6944e-06
rs56361316	cg27246571	-0.0678931	3.6944e-06
rs767280	cg15361247	-0.0331723	0.000304057
rs1468543	cg15361247	-0.0331723	0.000304057
rs2742406	cg15361247	-0.0329285	0.000316277
rs9311378	cg15361247	-0.0329285	0.000316277
rs2742454	cg15361247	-0.0329285	0.000316277
rs2742435	cg15361247	-0.0329285	0.000316277
rs2742436	cg15361247	-0.0329285	0.000316277
rs2742437	cg15361247	-0.0329285	0.000316277
rs2673039	cg15361247	-0.0329285	0.000316277
rs2249357	cg15361247	-0.0329285	0.000316277
rs2742397	cg15361247	-0.0329285	0.000316277
rs2673028	cg15361247	-0.0329285	0.000316277
rs9821974;rs71622516	cg15361247	-0.0329285	0.000316277
rs12301817	cg27246571	-0.0678931	3.6944e-06
rs9262113	cg16586538	0.0647162	7.50852e-09
rs7759666	cg16586538	0.0647162	7.50852e-09
rs9262122	cg16586538	0.0647162	7.50852e-09
rs3893313	cg09152259	0.0565207	1.56035e-08
rs56396137	cg27246571	-0.0691115	4.06508e-06
rs2069928	cg09152259	0.0731065	5.13001e-10
rs7137420	cg27246571	-0.0697932	1.21916e-06
rs7308844	cg27246571	-0.0697932	1.21916e-06
rs6538694	cg27246571	-0.0697932	1.21916e-06
rs6538695	cg27246571	-0.0697932	1.21916e-06
rs720325	cg20406979	0.0488142	3.58042e-06
rs2069914	cg09152259	0.0651471	4.95956e-10
rs2069913	cg09152259	0.0647919	1.55257e-09
rs76882214	cg27246571	-0.0678931	3.6944e-06
rs74334526	cg27246571	-0.0678931	3.6944e-06
rs7211504	cg16851743	-0.0345821	0.000173916
rs9459855	cg20406979	0.0539632	3.31633e-06
rs4713340	cg16586538	0.0641369	2.3216e-08
rs6538693	cg27246571	-0.0709226	1.40579e-06
rs12989081	cg09152259	0.049501	1.13576e-07
rs305069	cg22873414	-0.0429195	2.15029e-05
rs10484530	cg20406979	0.0539632	3.31633e-06
rs9457260	cg20406979	0.0539632	3.31633e-06
rs17524252	cg20406979	0.0539632	3.31633e-06
rs4710175	cg20406979	0.0539632	3.31633e-06
rs916331	cg20406979	0.0539632	3.31633e-06
rs13204839	cg20406979	0.0539632	3.31633e-06
rs6456152	cg20406979	0.0539632	3.31633e-06
rs9457262	cg20406979	0.0539632	3.31633e-06
rs4412174	cg20406979	0.0539632	3.31633e-06
rs4458654	cg20406979	0.0539632	3.31633e-06
rs34155048	cg20406979	0.0539632	3.31633e-06
rs34611616	cg20406979	0.0539632	3.31633e-06
rs7766242	cg20406979	0.0539632	3.31633e-06
rs424971	cg22873414	0.0415622	4.00234e-05
rs12209395	cg20406979	0.0539632	3.31633e-06
rs6920858	cg20406979	0.0539632	3.31633e-06
rs9459854	cg20406979	0.0539632	3.31633e-06
rs79268829	cg05840754	-0.113493	2.3796e-07
rs12692064	cg09152259	0.0573635	6.44605e-09
rs2069912	cg09152259	0.0651471	4.95956e-10
rs75893338	cg05840754	-0.116823	1.09059e-07
rs6509196	cg05840754	-0.1	3.45263e-07
rs34658268	cg02893324	-0.0599965	3.70581e-08
rs171329	cg09017117	-0.0438686	2.23499e-05
rs6430935	cg09152259	0.0540817	2.00198e-08
rs13017438	cg02893324	-0.0610586	1.7414e-08
rs10915994	cg02280892	0.0625604	0.000255229
rs12208359	cg20406979	0.0528805	5.58154e-06
rs60864846	cg05840754	-0.0988144	5.28953e-07
rs2742379	cg15361247	-0.0331723	0.000304057
rs2239827	cg20406979	0.0539632	3.31633e-06
rs10946207	cg20406979	0.0528805	5.58154e-06
rs2038580	cg20406979	0.0528805	5.58154e-06
rs9262152	cg16586538	0.0609085	1.18895e-07
rs1990231	cg12229367	0.0326252	6.66268e-06
rs9910446	cg12229367	0.0326252	6.66268e-06
rs12451748	cg12229367	0.0326252	6.66268e-06
rs12451753	cg12229367	0.0326252	6.66268e-06
rs12449409	cg12229367	0.0326252	6.66268e-06
rs7220397	cg12229367	0.0326252	6.66268e-06
rs8081251	cg12229367	0.0326252	6.66268e-06
rs9893344	cg12582317	0.0558028	1.21801e-05
rs7258183	cg05840754	-0.0988144	5.28953e-07
rs73562275	cg05840754	-0.0988144	5.28953e-07
rs2289397	cg02893324	-0.0618182	1.73773e-08
rs73562265	cg05840754	-0.0987464	6.94548e-07
rs9262147	cg16586538	0.0638089	3.38177e-08
rs13001648	cg09152259	0.0493018	1.91851e-06
rs9262136	cg16586538	0.0646196	2.79861e-08
rs12302993	cg27246571	-0.0409819	0.000806701
rs73216221	cg27246571	-0.0655217	8.31614e-06
rs4662729	cg09152259	0.0493018	1.91851e-06
rs1883094	cg15361247	-0.0308384	0.00121396
rs35798859;rs531335101	cg20406979	0.0468229	2.6198e-05
rs2666428	cg02280892	0.0481221	0.0045658
rs2894041	cg16586538	0.0646196	2.79861e-08
rs12490293	cg15361247	0.0313387	0.00113527
rs3219112	cg02280892	0.0449398	0.00565055
rs3754376	cg02280892	0.0449398	0.00565055
rs6728362	cg09152259	0.0493018	1.91851e-06
rs712210	cg16119449	-0.0589757	4.80848e-07
rs9675230	cg23470227	-0.0411983	9.53233e-05
rs3212713;rs386807459	cg02370334	-0.0197225	0.0389309
rs9905938	cg12229367	0.0326252	6.66268e-06
rs8064970	cg12229367	0.0326252	6.66268e-06
rs712211	cg16119449	-0.060305	1.55603e-06
rs2793382	cg02280892	0.0478975	0.00392414
rs2793380	cg02280892	0.0478975	0.00392414
rs2793657	cg02280892	0.0478975	0.00392414
rs9906591	cg12229367	0.03288	1.29228e-05
rs886925	cg12229367	0.03288	1.29228e-05
rs4709147	cg20406979	0.0549701	5.84256e-06
rs886926	cg12229367	0.0287686	4.00778e-05
rs3212711	cg02370334	-0.0197225	0.0389309
rs8078208	cg23470227	-0.0408397	0.000111474
rs9347170	cg20406979	-0.0392746	0.00123011
rs9459872	cg20406979	0.0549701	5.84256e-06
rs2516640	cg16586538	0.0620534	8.30488e-08
rs17615336	cg20406979	0.0486479	8.18762e-05
rs12332076	cg27569037	0.0463198	0.00139154
rs9993501	cg27569037	0.0463198	0.00139154
rs2069921	cg09152259	0.0554987	6.60607e-08
rs973760	cg09152259	0.0554987	6.60607e-08
rs3219090	cg02280892	0.0439157	0.00835668
rs4947285	cg16586538	0.0633096	6.98884e-08
rs2285148	cg20406979	0.0481117	2.05009e-05
rs9262124	cg16586538	0.0636611	3.77897e-08
rs747657	cg02280892	0.0439076	0.00882546
rs4793566	cg12229367	0.0287686	4.00778e-05
rs7211686	cg12229367	0.0287686	4.00778e-05
rs3219119	cg02280892	0.0412989	0.0112567
rs2048424	cg02280892	0.0479621	0.00534832
rs1417765	cg02280892	0.0479621	0.00534832
rs11680815	cg09152259	0.0679063	2.81922e-08
rs11697330	cg00568296	-0.0486648	0.00121367
rs758506	cg05840754	-0.109443	4.53551e-06
rs2247771	cg15361247	-0.0303541	0.00169726
rs2069933	cg09152259	0.0448954	8.12564e-06
rs443570	cg23216724	0.0487972	0.000315348
rs2910884	cg06726471	0.0375446	0.000118978
rs2377313	cg02280892	0.0496174	0.00390852
rs1811123	cg23216724	0.0479089	0.000428078
rs12949688	cg12582317	0.0557275	1.76776e-05
rs55874825	cg01297684	0.031856	0.00986127
rs62242234	cg15361247	-0.0344341	0.000728188
rs2239826	cg20406979	0.0551751	1.14194e-05
rs1401296	cg09152259	0.0438697	1.36039e-05
rs2757039	cg20406979	-0.0405279	0.00115575
rs10424547	cg25690897	-0.0367644	0.00564865
rs7686032	cg27569037	0.0463198	0.00139154
rs2673048	cg15361247	0.0265384	0.0116318
rs2742457	cg15361247	0.0265384	0.0116318
rs2015864	cg23216724	0.0478544	0.000405565
rs58413607	cg25690897	-0.0410396	0.00261224
rs12525855	cg20406979	0.050832	9.31359e-06
rs10946209	cg20406979	0.050832	9.31359e-06
rs2001114	cg20406979	0.050832	9.31359e-06
rs62436765	cg20406979	0.050832	9.31359e-06
rs10946208	cg20406979	0.050832	9.31359e-06
rs1962800	cg15361247	0.0264345	0.0124868
rs2757044	cg23216724	0.0472339	0.000462989
rs7212186	cg12229367	0.0287686	4.00778e-05
rs552492	cg19070398	-0.0374132	0.00208961
rs4794668	cg15815084	0.0538644	0.00035107
rs998247	cg00302379	-0.0358452	2.77704e-06
rs10143198	cg00302379	-0.0358452	2.77704e-06
rs17585333	cg27569037	0.0463198	0.00139154
rs393727	cg23216724	0.0472339	0.000462989
rs4662730	cg09152259	0.0493018	1.91851e-06
rs7251606	cg25690897	-0.0535761	1.56486e-05
rs11735317	cg27569037	0.0463198	0.00139154
rs2048426	cg02280892	0.0415515	0.0139452
rs828875	cg12777002	0.0241488	0.0547612
rs828874	cg12777002	0.0241488	0.0547612
rs12949028	cg12229367	0.0316145	1.81742e-05
rs12950062	cg12229367	0.0316145	1.81742e-05
rs2149083	cg23216724	0.0472339	0.000462989
rs2149084	cg23216724	0.0472339	0.000462989
rs2769346	cg23216724	0.0472339	0.000462989
rs2149085	cg23216724	0.0472339	0.000462989
rs2769347	cg23216724	0.0472339	0.000462989
rs2769348	cg23216724	0.0472339	0.000462989
rs2149090	cg23216724	0.0472339	0.000462989
rs2149091	cg23216724	0.0472339	0.000462989
rs2149092	cg23216724	0.0472339	0.000462989
rs12946237	cg15815084	0.0538644	0.00035107
rs7147987	cg00302379	-0.031354	2.55387e-05
rs1805414	cg02280892	0.045055	0.00820766
rs2027439	cg02280892	0.045055	0.00820766
rs394522	cg23216724	0.0472971	0.000496796
rs1819333	cg23216724	0.0472339	0.000462989
rs2013815	cg23216724	0.0472339	0.000462989
rs2769349	cg23216724	0.0472339	0.000462989
rs1187530	cg23216724	0.0472339	0.000462989
rs2757050	cg23216724	0.0472339	0.000462989
rs1590257	cg23216724	0.0472339	0.000462989
rs2769351	cg23216724	0.0472339	0.000462989
rs6939196	cg23216724	0.0472339	0.000462989
rs2769354	cg23216724	0.0472339	0.000462989
rs2757052	cg23216724	0.0472339	0.000462989
rs1211447	cg23216724	0.0472339	0.000462989
rs1187532	cg23216724	0.0472339	0.000462989
rs434093	cg23216724	0.0472339	0.000462989
rs448060	cg23216724	0.0472339	0.000462989
rs365189	cg23216724	0.0472339	0.000462989
rs376551	cg23216724	0.0472339	0.000462989
rs386548	cg23216724	0.0472339	0.000462989
rs402749	cg23216724	0.0472339	0.000462989
rs385863	cg23216724	0.0472339	0.000462989
rs397713	cg23216724	0.0472339	0.000462989
rs453184	cg23216724	0.0472339	0.000462989
rs436707	cg23216724	0.0472339	0.000462989
rs442298	cg23216724	0.0472339	0.000462989
rs377753	cg23216724	0.0472339	0.000462989
rs430477	cg23216724	0.0472339	0.000462989
rs376574	cg23216724	0.0472339	0.000462989
rs439237	cg23216724	0.0472339	0.000462989
rs9457247	cg23216724	0.0472339	0.000462989
rs9459827	cg23216724	0.0472339	0.000462989
rs1794699	cg23216724	0.0472339	0.000462989
rs1743439	cg23216724	0.0472339	0.000462989
rs13192426	cg23216724	0.0472339	0.000462989
rs13192687	cg23216724	0.0472339	0.000462989
rs9717548	cg23216724	0.0472339	0.000462989
rs5020533	cg23216724	0.0472339	0.000462989
rs1620933	cg23216724	0.0472339	0.000462989
rs415987	cg23216724	0.0472339	0.000462989
rs1794697	cg23216724	0.0472339	0.000462989
rs34560498;rs386708543	cg23216724	0.0472339	0.000462989
rs414437	cg23216724	0.0472339	0.000462989
rs421214	cg23216724	0.0472339	0.000462989
rs422094	cg23216724	0.0472339	0.000462989
rs393558	cg23216724	0.0472339	0.000462989
rs436625	cg23216724	0.0472339	0.000462989
rs408040	cg23216724	0.0472339	0.000462989
rs408918	cg23216724	0.0472339	0.000462989
rs413232	cg23216724	0.0472339	0.000462989
rs86755	cg23216724	0.0472339	0.000462989
rs382009	cg23216724	0.0472339	0.000462989
rs428805	cg23216724	0.0472339	0.000462989
rs2345571	cg23216724	0.0472339	0.000462989
rs385460	cg23216724	0.0472339	0.000462989
rs385113	cg23216724	0.0472339	0.000462989
rs932644	cg23216724	0.0472339	0.000462989
rs10946198	cg23216724	0.0472339	0.000462989
rs1743440	cg23216724	0.0472339	0.000462989
rs1743441	cg23216724	0.0472339	0.000462989
rs1794694	cg23216724	0.0472339	0.000462989
rs430293	cg23216724	0.0472339	0.000462989
rs430097	cg23216724	0.0472339	0.000462989
rs409356	cg23216724	0.0472339	0.000462989
rs447042	cg23216724	0.0472339	0.000462989
rs402191	cg23216724	0.0472339	0.000462989
rs1794693	cg23216724	0.0472339	0.000462989
rs401260	cg23216724	0.0472339	0.000462989
rs422694	cg23216724	0.0472339	0.000462989
rs422780	cg23216724	0.0472339	0.000462989
rs400176	cg23216724	0.0472339	0.000462989
rs422562	cg23216724	0.0472339	0.000462989
rs416131	cg23216724	0.0472339	0.000462989
rs415890	cg23216724	0.0472339	0.000462989
rs415842	cg23216724	0.0472339	0.000462989
rs389956	cg23216724	0.0472339	0.000462989
rs389946	cg23216724	0.0472339	0.000462989
rs10946199	cg23216724	0.0472339	0.000462989
rs366938	cg23216724	0.0472252	0.000456641
rs1811121	cg23216724	0.0472252	0.000456641
rs401261	cg23216724	0.0473248	0.000362192
rs444210	cg23216724	-0.0445952	0.00100158
rs364283	cg23216724	0.0476738	0.000736383
rs429083	cg23216724	0.0476738	0.000736383
rs17279465	cg15361247	-0.0370014	4.56991e-05
rs2578665	cg15361247	-0.0332488	0.000342238
rs3896369	cg15815084	0.0538644	0.00035107
rs11649870	cg15815084	0.0538644	0.00035107
rs3108163	cg12777002	0.0241721	0.053982
rs2251109	cg15361247	-0.0347616	0.000186154
rs576702	cg19070398	0.0363584	0.00273152
rs2742434	cg15361247	0.0265384	0.0116318
rs2769355	cg23216724	0.050537	0.000218313
rs2757054	cg23216724	0.050537	0.000218313
rs10461909	cg06726471	0.0366341	0.000230498
rs28556935	cg02893324	-0.0520927	5.9063e-07
rs1397550	cg02280892	0.0451753	0.0071385
rs1341336	cg02280892	0.0450298	0.00682501
rs2793378	cg02280892	0.0450298	0.00682501
rs1104893	cg02280892	0.0450298	0.00682501
rs2793377	cg02280892	0.0450298	0.00682501
rs2377013	cg02280892	0.0450298	0.00682501
rs2249844	cg02280892	0.0450298	0.00682501
rs1828446	cg02280892	0.0450298	0.00682501
rs1828445	cg02280892	0.0450298	0.00682501
rs2793654	cg02280892	0.0450298	0.00682501
rs2666427	cg02280892	0.0450298	0.00682501
rs11685001	cg02893324	-0.0632111	8.46488e-09
rs3966008	cg15815084	0.0540787	0.000374282
rs1899629	cg15815084	0.0540787	0.000374282
rs4793831	cg15815084	0.0540787	0.000374282
rs3853823	cg15815084	0.0540787	0.000374282
rs7219961	cg15815084	0.0540787	0.000374282
rs8078452	cg23470227	-0.0394051	0.000168566
rs112264669;rs148230910;rs746712206;rs369727001;rs371862832;rs375707057;rs386733089;rs796779136;rs867086807	cg20859453	0.0495692	0.112516
rs405553	cg23216724	0.0472339	0.000462989
rs2052563	cg06726471	0.0399341	6.43486e-05
rs4691171	cg27569037	0.0541056	1.37997e-05
rs4691172	cg27569037	0.0541056	1.37997e-05
rs28495910	cg27569037	0.0541056	1.37997e-05
rs9968334	cg27569037	0.0541056	1.37997e-05
rs6834975	cg27569037	0.0541056	1.37997e-05
rs6835694	cg27569037	0.0541056	1.37997e-05
rs12198816	cg20406979	0.050832	9.31359e-06
rs2332966	cg12229367	0.0301728	4.85269e-05
rs971207	cg09152259	0.0448954	8.12564e-06
rs1518759	cg09152259	0.0448954	8.12564e-06
rs1957949	cg00302379	-0.0358452	2.77704e-06
rs2534816	cg16586538	0.0591722	2.16585e-06
rs12313602	cg01297684	0.0301721	0.0189104
rs55927117	cg01297684	0.031856	0.00986127
rs4710147	cg23216724	0.0472339	0.000462989
rs2757046	cg23216724	0.0472339	0.000462989
rs2757047	cg23216724	0.0472339	0.000462989
rs9624047	cg06040542	-0.0389736	4.22676e-06
rs1865222	cg02280892	0.0450298	0.00682501
rs1865221	cg02280892	0.0450298	0.00682501
rs1865220	cg02280892	0.0450298	0.00682501
rs2695235	cg02280892	0.0450298	0.00682501
rs2793655	cg02280892	0.0450298	0.00682501
rs2793376	cg02280892	0.0450298	0.00682501
rs2695236	cg02280892	0.0450298	0.00682501
rs8054065	cg22873414	0.0436704	1.0954e-05
rs8512	cg16586538	0.0596376	1.81428e-07
rs2345573	cg23216724	0.0472339	0.000462989
rs4710149	cg20406979	-0.045291	0.000277264
rs7750593	cg20406979	-0.045291	0.000277264
rs5996483	cg06040542	-0.0389736	4.22676e-06
rs2267011	cg06040542	-0.0389736	4.22676e-06
rs4972533	cg02893324	-0.0618182	1.73773e-08
rs56816393	cg06726471	0.0353804	0.000365335
rs2910907	cg06726471	0.0353804	0.000365335
rs4605609	cg27569037	0.0424111	0.000377322
rs2296316	cg00302379	-0.0294701	4.71057e-05
rs2695237	cg02280892	0.0453614	0.00622777
rs11649318	cg22873414	0.0370452	0.000454037
rs2963960	cg06726471	0.0380364	0.000238304
rs17581728	cg23470227	-0.0548709	3.44551e-06
rs5936	cg09152259	0.0448954	8.12564e-06
rs2673067	cg15361247	-0.0315725	0.00105744
rs17527080	cg06726471	0.0304362	0.00459098
rs4997107	cg23216724	0.0472339	0.000462989
rs2052561	cg06726471	0.0380364	0.000238304
rs5751606	cg06040542	-0.0385384	5.84967e-06
rs5759637	cg06040542	-0.0385384	5.84967e-06
rs12484280	cg06040542	-0.0385384	5.84967e-06
rs2236313	cg20406979	-0.0434897	0.000214909
rs2910926	cg06726471	0.0380364	0.000238304
rs61219219	cg06726471	0.0355984	0.000438768
rs67272103	cg08928926	0.0643722	0.000568916
rs860455	cg12777002	0.0241488	0.0547612
rs12460985	cg05840754	-0.111659	2.23865e-07
rs8112667	cg25690897	-0.0363302	0.0062469
rs57425612	cg25690897	-0.0411477	0.00234353
rs2071434	cg06040542	-0.0385384	5.84967e-06
rs6941355	cg20406979	0.0450055	4.97433e-05
rs187753759	cg09152259	0.0685465	1.75512e-08
rs880933	cg09152259	0.0685465	1.75512e-08
rs7716300	cg06726471	0.0380364	0.000238304
rs7715899	cg06726471	0.0380364	0.000238304
rs9262162	cg16586538	0.0629995	9.91736e-08
rs555209	cg19070398	-0.0374036	0.00175645
rs2290769	cg23470227	-0.0553847	2.66382e-06
rs525861	cg19070398	-0.0376276	0.00151195
rs2247314	cg20406979	-0.0403775	0.000799742
rs79858158	cg27246571	-0.0611309	1.88451e-05
rs12178491	cg20406979	0.0556077	1.3617e-05
rs61937885	cg27246571	-0.0561569	6.41659e-05
rs17677763	cg27246571	-0.0561569	6.41659e-05
rs61937883	cg27246571	-0.0561569	6.41659e-05
rs73152631	cg06040542	-0.0393053	1.11223e-05
rs9366078	cg20406979	-0.0424134	0.000388871
rs2757053	cg20406979	-0.045291	0.000277264
rs1130033	cg20406979	-0.045291	0.000277264
rs57557794	cg06726471	0.0380284	0.000264431
rs60649342	cg06726471	0.0380284	0.000264431
rs16889557	cg06726471	0.0380284	0.000264431
rs13183947	cg06726471	0.0307104	0.00512255
rs7224488	cg15815084	0.0538644	0.00035107
rs408087	cg23216724	-0.0446548	0.000792281
rs12055488	cg20406979	-0.042023	0.000470456
rs3963512	cg20406979	-0.042023	0.000470456
rs9355610	cg20406979	-0.042023	0.000470456
rs112267124;rs767502356	cg23470227	-0.0526428	6.74082e-06
rs2239824	cg20406979	0.0542991	2.4328e-05
rs55873403	cg20406979	0.0542991	2.4328e-05
rs12193698	cg20406979	0.0542991	2.4328e-05
rs2239823	cg20406979	0.0542991	2.4328e-05
rs17677715	cg27246571	-0.0561569	6.41659e-05
rs2247315	cg20406979	-0.0405279	0.00115575
rs2910885	cg06726471	0.0380364	0.000238304
rs2910886	cg06726471	0.0380364	0.000238304
rs6886940	cg06726471	0.0305526	0.00577192
rs3867600	cg15815084	0.0540787	0.000374282
rs2093989	cg00302379	0.026347	0.000143269
rs2345568	cg20406979	-0.0452777	0.000282497
rs4759187	cg01297684	0.0329098	0.00594817
rs9426568	cg02280892	0.0453614	0.00622777
rs9356551	cg20406979	-0.0380814	0.000959087
rs1951459	cg20406979	-0.0380814	0.000959087
rs933243	cg20406979	-0.0380814	0.000959087
rs112383632	cg20406979	-0.0399177	0.000823438
rs4710154	cg20406979	-0.0399177	0.000823438
rs2761207	cg19566482	0.0290604	0.0282995
rs407515	cg23216724	0.0478322	0.000856938
rs406095	cg23216724	0.0478322	0.000856938
rs4710160	cg23216724	0.0478322	0.000856938
rs4710161	cg23216724	0.0478322	0.000856938
rs388406	cg23216724	0.0478322	0.000856938
rs430145	cg23216724	0.0478322	0.000856938
rs425039	cg23216724	0.0478322	0.000856938
rs376097	cg23216724	0.0478322	0.000856938
rs424185	cg23216724	0.0478322	0.000856938
rs400837	cg23216724	0.0478322	0.000856938
rs10769148	cg03700417	-0.0348038	0.0104573
rs10769149	cg03700417	-0.0348038	0.0104573
rs5020450	cg27246571	-0.0561569	6.41659e-05
rs9457270	cg20406979	0.0509255	2.62832e-05
rs521448	cg19070398	-0.0376276	0.00151195
rs400063	cg23216724	-0.043376	0.00140757
rs1794700	cg23216724	-0.043376	0.00140757
rs77241275	cg20406979	-0.0403775	0.000799742
rs1157786	cg03700417	-0.0358727	0.00507093
rs11959553	cg06726471	0.0367475	0.000255416
rs4899161	cg00302379	0.0276819	0.000404819
rs1341334	cg02280892	0.0459928	0.00465446
rs1341335	cg02280892	0.0459928	0.00465446
rs2570368	cg02280892	0.0459928	0.00465446
rs4755992	cg03700417	-0.0358727	0.00507093
rs67495946	cg09152259	0.0685465	1.75512e-08
rs71646317	cg08928926	0.0655094	0.000598695
rs9893344	cg12229367	0.0290083	8.01752e-05
rs7156617	cg00302379	0.0275454	0.000385494
rs2757041	cg20406979	-0.0405534	0.00133522
rs2695238	cg02280892	0.0453614	0.00622777
rs1341333	cg02280892	0.0453614	0.00622777
rs55842986	cg06726471	0.0315831	0.00355755
rs55790738	cg06726471	0.0315831	0.00355755
rs60744736	cg06726471	0.0315831	0.00355755
rs2910905	cg06726471	0.0315831	0.00355755
rs56227241	cg06726471	0.0315831	0.00355755
rs12615166	cg02893324	-0.0507506	2.26902e-05
rs439553	cg23216724	-0.043376	0.00140757
rs12949688	cg12229367	0.0309271	4.12557e-05
rs1568277	cg09152259	0.0679063	2.81922e-08
rs1488667	cg03700417	-0.039852	0.00254538
rs7956370	cg27246571	-0.0585775	2.33929e-05
rs702465	cg12777002	0.0241488	0.0547612
rs9891076	cg23470227	-0.036241	0.000551836
rs4755988	cg03700417	-0.0348038	0.0104573
rs1019512	cg06726471	0.0355018	0.000520667
rs4902359	cg00302379	0.0326229	8.27938e-06
rs6983152	cg19750024	-0.0321558	8.76179e-05
rs2695239	cg02280892	0.0459928	0.00465446
rs4710176	cg20406979	0.0442304	0.000114121
rs1858550	cg02280892	0.0485545	0.00469705
rs2570369	cg02280892	0.0472926	0.00546565
rs2136875	cg02280892	0.0472926	0.00546565
rs2695240	cg02280892	0.0472926	0.00546565
rs2570370	cg02280892	0.0472926	0.00546565
rs8008095	cg00302379	-0.032807	1.18186e-05
rs1530869	cg03700417	-0.0348038	0.0104573
rs2198153	cg03700417	-0.0348038	0.0104573
rs2199048	cg23470227	-0.0384942	0.000342386
rs7152277	cg00302379	-0.032807	1.18186e-05
rs10753426	cg02280892	0.0564849	0.00180613
rs7158239	cg00302379	-0.032807	1.18186e-05
rs8011585	cg00302379	-0.032807	1.18186e-05
rs8015921	cg00302379	-0.032807	1.18186e-05
rs2071431	cg06040542	-0.0385384	5.84967e-06
rs7150646	cg00302379	0.0332639	7.97394e-06
rs4902357	cg00302379	0.0332639	7.97394e-06
rs8006419	cg00302379	-0.0247497	0.000210192
rs7155454	cg00302379	-0.0247497	0.000210192
rs387733	cg23216724	0.0478322	0.000856938
rs712208	cg16119449	0.0638714	0.000122003
rs8075002	cg02433148	0.0392611	3.77357e-05
rs4076073	cg23470227	-0.0350989	0.000676186
rs2427645	cg16586538	0.058028	5.18875e-06
rs2534822	cg16586538	0.058028	5.18875e-06
rs10928765	cg09152259	0.0679063	2.81922e-08
rs62160265	cg09152259	0.0679063	2.81922e-08
rs9624048	cg06040542	-0.0393053	1.11223e-05
rs9624049	cg06040542	-0.0393053	1.11223e-05
rs9624051	cg06040542	-0.0393053	1.11223e-05
rs5759635	cg06040542	-0.0393053	1.11223e-05
rs5751607	cg06040542	-0.0393053	1.11223e-05
rs305077	cg22873414	0.0327945	0.00149845
rs1044059	cg23216724	0.0480695	0.000877572
rs36103648	cg02893324	-0.0511565	1.78407e-05
rs6887245	cg06726471	0.0305526	0.00577192
rs62360772	cg06726471	0.0305526	0.00577192
rs56206837	cg06726471	0.0306367	0.00165778
rs2665957	cg23470227	-0.0348418	0.00104897
rs34184001	cg00302379	0.02681	4.25319e-05
rs59928617	cg05840754	-0.134458	1.50695e-07
rs7218498	cg23470227	-0.0348231	0.000960185
rs2608880	cg23470227	-0.0348231	0.000960185
rs1858548	cg02280892	0.0472926	0.00546565
rs1858549	cg02280892	0.0472926	0.00546565
rs8137846	cg06040542	-0.0393053	1.11223e-05
rs3682	cg23470227	-0.0370529	0.000481295
rs2046046	cg17430199	-0.0528058	4.03538e-06
rs1019129	cg15361247	0.0227826	0.0147443
rs4793912	cg12229367	0.025752	0.000452319
rs2292980	cg22873414	0.0358957	0.0015978
rs12691486	cg08928926	0.0622736	0.00106105
rs2963977	cg06726471	0.0355018	0.000520667
rs11959574	cg06726471	0.0306367	0.00165778
rs62363268	cg06726471	0.0306367	0.00165778
rs4307102	cg06726471	0.0306367	0.00165778
rs4075638	cg06726471	0.0306367	0.00165778
rs1079991	cg16586538	0.0531856	2.02957e-05
rs8138361	cg06040542	-0.038743	2.45265e-05
rs2071433	cg06040542	-0.0393053	1.11223e-05
rs13086609	cg15361247	0.0228453	0.0139754
rs2673062	cg15361247	0.0228453	0.0139754
rs2673032	cg15361247	0.0228453	0.0139754
rs2673031	cg15361247	0.0228453	0.0139754
rs2742394	cg15361247	0.0228453	0.0139754
rs2673030	cg15361247	0.0228453	0.0139754
rs2742395	cg15361247	0.0228453	0.0139754
rs2673029	cg15361247	0.0228453	0.0139754
rs2742398	cg15361247	0.0228453	0.0139754
rs2064063	cg15361247	0.0228453	0.0139754
rs2064064	cg15361247	0.0228453	0.0139754
rs2064062	cg15361247	0.0228453	0.0139754
rs2742448	cg15361247	0.0228453	0.0139754
rs2742449	cg15361247	0.0228453	0.0139754
rs2742453	cg15361247	0.0228453	0.0139754
rs2742455	cg15361247	0.0228453	0.0139754
rs2742458	cg15361247	0.0228453	0.0139754
rs1468542	cg15361247	0.0228453	0.0139754
rs2742372	cg15361247	0.0228453	0.0139754
rs2742374	cg15361247	0.0228453	0.0139754
rs2742375	cg15361247	0.0228453	0.0139754
rs11547070;rs67739766;rs796745954;rs397714906	cg15361247	0.0228453	0.0139754
rs2666003	cg23470227	-0.0348231	0.000960185
rs2742370	cg15361247	0.0227826	0.0147443
rs2673066	cg15361247	0.0227826	0.0147443
rs2531755	cg15361247	0.0227826	0.0147443
rs2673055	cg15361247	0.0227826	0.0147443
rs2253979	cg15361247	0.0227826	0.0147443
rs11709306	cg15361247	0.0227826	0.0147443
rs9826208	cg15361247	0.0227826	0.0147443
rs2742464	cg15361247	0.0227826	0.0147443
rs7631818	cg15361247	0.0227826	0.0147443
rs6807438	cg15361247	0.0227826	0.0147443
rs13059502	cg15361247	0.0227826	0.0147443
rs2742371	cg15361247	0.0227826	0.0147443
rs726668	cg00302379	-0.0259245	0.00015989
rs9675156	cg23470227	-0.0341261	0.00135474
rs6501843	cg23470227	-0.0341261	0.00135474
rs4788913	cg23470227	-0.0341261	0.00135474
rs11627485	cg00302379	0.0306233	1.72362e-05
rs75468875	cg23747839	-0.0430395	0.000515897
rs10852766	cg23470227	-0.0341261	0.00135474
rs9674966	cg23470227	-0.0364236	0.000667363
rs12435835	cg00302379	-0.0225947	0.000652839
rs1135640	cg23470227	-0.0341261	0.00135474
rs56248937	cg23470227	-0.0332465	0.00127594
rs17737199	cg16609459	-0.0377154	0.000721314
rs4762293	cg16609459	-0.0377154	0.000721314
rs4075637	cg06726471	0.0299967	0.00238049
rs10928766	cg09152259	0.0690111	6.92541e-09
rs1568279	cg09152259	0.0679063	2.81922e-08
rs62160266	cg09152259	0.0679063	2.81922e-08
rs55997706	cg16609459	-0.0377154	0.000721314
rs73223927	cg16609459	-0.0377154	0.000721314
rs2285147	cg20406979	0.0410328	0.000152232
rs12131153	cg08928926	0.061902	0.000739915
rs12479451	cg19070398	0.0380619	0.00142774
rs6086014	cg19070398	0.0380619	0.00142774
rs6086019	cg19070398	0.0380619	0.00142774
rs2224270	cg19070398	0.0380619	0.00142774
rs2742463	cg15361247	0.0235407	0.0128614
rs3760128	cg23470227	-0.0371002	0.000325416
rs35033486	cg06726471	0.0291284	0.00552929
rs11948747	cg06726471	0.0307104	0.00512255
rs3769157	cg02893324	-0.0601843	6.10386e-08
rs2781375	cg00302379	-0.0315642	2.29164e-05
[truncated: 6,681 more rows]
